# Supplementary material for: Genome-wide CRISPR screens identify the YAP/TEAD axis as a driver of persister cells in EGFR mutant lung cancer
Source: PubMed Central journal article supplement (PMC11043391; doi:10.1038/s42003-024-06190-w), 2024-04-24
Supplement: 42003_2024_6190_MOESM3_ESM.pdf [file 42003_2024_6190_MOESM3_ESM.pdf]

## Description of Additional Supplementary Files

**File name:** Supplementary Data 1

**Description:** Significantly enriched gefitinib or osimertinib resistance genes in *EGFR* mutant lung cancer.

**File name:** Supplementary Data 2

**Description:** Genes ranked for enrichment: MAGeCK analysis of gefitinib vs control PC-9 cells following transduction with a genome-wide CRISPRn or CRISPRa library.

**File name:** Supplementary Data 3

**Description:** Genes ranked for enrichment: MAGeCK analysis of osimertinib vs control PC-9 cells following transduction with a genome-wide CRISPRn or CRISPRa library.

**File name:** Supplementary Data 4

**Description:** Genes ranked for enrichment: MAGeCK analysis of gefitinib vs control HCC827 cells following transduction with a genome-wide CRISPRn or CRISPRa library.

**File name:** Supplementary Data 5

**Description:** Genes ranked for enrichment: MAGeCK analysis of osimertinib vs control HCC827 cells following transduction with a genome-wide CRISPRn or CRISPRa library.

**File name:** Supplementary Data 6

**Description:** Genes ranked for enrichment: MAGeCK analysis of osimertinib vs control PC-9 T790M cells following transduction with a genome-wide CRISPRn or CRISPRa library.

**File name:** Supplementary Data 7

**Description:** Genes ranked for enrichment: MAGeCK analysis of osimertinib vs control HCC827 T790M cells following transduction with a genome-wide CRISPRn or CRISPRa library.

**File name:** Supplementary Data 8

**Description:** Arrayed CRISPR screen in PC-9 cells of resistance genes with high content microscopy quantification of PI3K/MAPK/mTOR and Hippo pathway components following osimertinib treatment.

**File name:** Supplementary Data 9

**Description:** Arrayed CRISPR screen in HCC4006 cells of resistance genes with high content microscopy quantification of PI3K/MAPK/mTOR and Hippo pathway components following osimertinib treatment.

**File name:** Supplementary Data 10

**Description:** Arrayed CRISPR screen in HCC827 cells of resistance genes with high content microscopy quantification of PI3K/MAPK/mTOR and Hippo pathway components following osimertinib treatment.

**File name:** Supplementary Data 11

**Description:** Significantly enriched sensitizing genes to EGFR kinase inhibition in *EGFR* mutant lung cancer.

**File name:** Supplementary Data 12

**Description:** Differentially expressed genes detected in isogenic models (NF2 KO, WWTR1 OE, YAP1 OE or osimertinib treatment) of PC-9, HCC827 and HCC4006 cell lines.

**File name:** Supplementary Data 13

**Description:** Transcription factor (TF) activity scores in PC-9, HCC827 and HCC4006 cell lines following knockout (KO) or overexpression (OE) of the Hippo resistance genes NF2, WWTR1 and YAP1.

**File name:** Supplementary Data 14

**Description:** Gene set enrichment analyses of Molecular Signatures Database Hallmarks genesets detected in (a) isogenic models (NF2 KO, YAP1 OE, WWTR1 OE) versus parental PC-9, HCC827 and HCC4006 cell lines and (b) Osimertinib treated vs untreated cells at 24 hours.

**File name:** Supplementary Data 15

**Description:** Nuclear YAP1 and WWTR1 expression in osimertinib sensitive or resistant *EGFR* mutant lung cancer PDX models.

**File name:** Supplementary Data 16

**Description:** Q-PCR mRNA gene expression of canonical Hippo transcripts CTGF, CYR61 and AMOTL2 in *EGFR* mutant 2D cell lines and 3D organoid models following osimertinib treatment.

**File name:** Supplementary Data 17

**Description:** Guide RNA targeting sequences.

**File name:** Supplementary Data 18

**Description:** JASPAR and TRANSFAC database transcription factors (TF) used to infer TF activity from RNA-seq datasets.
