# Supplementary material for: Genome-wide CRISPR screens identify the YAP/TEAD axis as a driver of persister cells in EGFR mutant lung cancer
Source: Commun Biol. 2024 Apr 24;7:497. doi: 10.1038/s42003-024-06190-w (PMC11043391; doi:10.1038/s42003-024-06190-w)
Supplement: Supplementary file 4 — Supplementary Data 1-18 [file 42003_2024_6190_MOESM4_ESM.xlsx]

## Sheet: Table of Contents
	Table of Contents
	Pfeifer et al. Genome-wide CRISPR screens identify the YAP/TEAD axis as a driver of persister cells in EGFR mutant lung cancer.
	Supplementary Data 1	Significantly enriched gefitinib or osimertinib resistance genes in EGFR mutant lung cancer.
	Supplementary Data 2	Genes ranked for enrichment: MAGecK analysis of gefitinib vs control PC-9 cells following transduction with a genome-wide CRISPRn or CRISPRa library.
	Supplementary Data 3	Genes ranked for enrichment: MAGecK analysis of osimertinib vs control PC-9 cells following transduction with a genome-wide CRISPRn or CRISPRa library.
	Supplementary Data 4	Genes ranked for enrichment: MAGecK analysis of gefitinib vs control HCC827 cells following transduction with a genome-wide CRISPRn or CRISPRa library.
	Supplementary Data 5	Genes ranked for enrichment: MAGecK analysis of osimertinib vs control HCC827 cells following transduction with a genome-wide CRISPRn or CRISPRa library.
	Supplementary Data 6	Genes ranked for enrichment: MAGecK analysis of osimertinib vs control PC-9 T790M cells following transduction with a genome-wide CRISPRn or CRISPRa library.
	Supplementary Data 7	Genes ranked for enrichment: MAGecK analysis of osimertinib vs control HCC827 T790M cells following transduction with a genome-wide CRISPRn or CRISPRa library.
	Supplementary Data 8	Arrayed CRISPR screen in PC-9 cells of resistance genes with high content microscopy quantification of PI3K/MAPK/mTOR and Hippo pathway components following osimertinib treatment.
	Supplementary Data 9	Arrayed CRISPR screen in HCC4006 cells of resistance genes with high content microscopy quantification of PI3K/MAPK/mTOR and Hippo pathway components following osimertinib treatment.
	Supplementary Data 10	Arrayed CRISPR screen in HCC827 cells of resistance genes with high content microscopy quantification of PI3K/MAPK/mTOR and Hippo pathway components following osimertinib treatment.
	Supplementary Data 11	Significantly enriched sensitizing genes to EGFR kinase inhibition in EGFR mutant lung cancer.
	Supplementary Data 12	Differentially expressed genes detected in isogenic models (NF2 KO, WWTR1 OE, YAP1 OE or osimertinb treatment) of PC-9, HCC827 and HCC4006 cell lines.
	Supplementary Data 13	Transcription factor (TF) activity scores in PC-9, HCC827 and HCC4006 cell lines following knockout (KO) or overexpression (OE) of the Hippo resistance genes NF2, WWTR1 and YAP1.
	Supplementary Data 14	Gene set enrichment analyses of Molecular Signatures Database Hallmarks genesets detected in (a) isogenic models (NF2 KO, YAP1 OE, WWTR1 OE) versus parental PC-9, HCC827 and HCC4006 cell lines and (b) Osimertinib treated vs untreated cells at 24 hours.
	Supplementary Data 15	Nuclear YAP1 and WWTR1 expression in osimertinib sensitive or resistant EGFR mutant lung cancer PDX models.
	Supplementary Data 16	Q-PCR mRNA gene expression of canonical Hippo transcripts CTGF, CYR61 and AMOTL2 in EGFR mutant 2D cell lines and 3D organoid models following osimertinib treatment.
	Supplementary Data 17	Guide RNA targeting sequences.
	Supplementary Data 18	JASPAR and TRANSFAC database transcription factors (TF) used to infer TF activity from RNA-seq datasets.

## Sheet: Supp Data 1
	Supplementary Data 1. Significantly enriched gefitinib or osimertinib resistance genes in EGFR mutant lung cancer.
	Log fold change (LFC) values for all significantly enriched resistance genes following MAGecK analysis (p-value <0.005 and absolute fold change of ≥ 2). Blank squares indicate no significant hit.
	Genes are ranked according to frequency with which oberved as a resistance gene in the 6 studies. Full MAGeCK gene summary and raw read count files available at: https://az.box.com/s/bgxjw7l7pjkbektqw59h84iiz1anpjij
	Positive values (Red) indicate genes that confer resistance when overexpessed (from CRISPR activation screen) and Negative values (Blue) indicate genes that confer resistance when silenced (from CRISPR knockout screen).
	The top 38 genes detected in >= 4 of 6 studies are highlighted in red. Genes predicted to activate Hippo signalling are indicated (yellow highlight).
		Gefitinib	Gefitinib	Osimertinib	Osimertinib	Osimertinib	Osimertinib
	Gene	PC-9	HCC827	PC-9	PC-9_T790M	HCC827	HCC827_T790M	Freq
	FOSL1	6.2926	1.0112	6.4372	7.8698	1.7097	1.4208	6
	MET	6.7176	1.9496	6.9303	4.7493	1.7476	5.0531	6
	TSC2	-2.3153	-1.8161	-3.4519	-5.2744	-1.7805	-2.4871	6
	PTEN	-4.4976	-2.0138	-5.9365	-6.13	-1.9183	-1.562	6
	NF2	-5.5357	-3.0553	-6.4583	-9.0345	-2.7357	-1.9097	6
	WWTR1	4.5644		4.96	6.8134	1.1074	2.569	5
	NTRK1	2.9592	1.1124	3.7004		1.291	1.661	5
	PARD3	-2.2137	1.8911	-2.4353		1.3646	2.984	5
	KEAP1	-2.2282	-1.8142	-2.5479		-1.5526	-3.1226	5
	C16orf72	-1.4943	-1.5409	-2.0263	-5.9318	-1.3485		5
	PTBP1	-1.937	-1.191	-3.665	-5.306	-1.4462		5
	MED19	-2.0675	-1.007	-2.716	-8.28	-1.1417		5
	RNF7		-2.9109	-1.7617	-5.3029	-3.3884	-1.8655	5
	MED24	-2.4066	-1.2289	-3.0095	-9.4128	-1.2937		5
	KCTD9	-3.647	-1.613	-4.1348	-6.8264	-1.6181		5
	CSK	-6.1012	-1.4429	-7.2738	-11.145	-1.3304		5
	KCTD5	-7.5085	-2.916	-9.9193	-9.5933	-2.5985		5
	KRAS	6.6791		6.9641	7.4044	1.7212		4
	UNC45A	-1.6962	-1.1326	-2.1948		-1.0157		4
	UBE3D		-1.3599	-1.9129		-1.5809	-1.5689	4
	CAND1	-1.3646	-1.289	-1.8542			-2.0264	4
	MEMO1	-2.1651	-1.132	-2.3492		-1.0154		4
	TSC1	-1.3833	-1.3047	-2.7864			-1.6113	4
	MAU2	-2.046		-3.6119		-1.0542	-1.3346	4
	EWSR1	-2.2266	-1.7345	-2.7819		-1.3195		4
	CMTR2		-1.6576	-2.8313		-1.8073	-2.5627	4
	DPH1	-1.8821	-1.5123	-4.1257		-1.4023		4
	HUWE1		-1.2851		-4.4813	-1.0777	-2.1761	4
	MYH9	-2.12	-2.5633	-2.019		-2.427		4
	SMARCB1	-2.0826	-1.8427		-3.971	-1.2843		4
	NHLRC2	-2.8987	-2.1982	-3.7369		-2.0812		4
	SETD1B	-1.8243		-1.9041	-4.4276		-1.5493	4
	CUL5		-1.2115	-2.2234	-6.9531	-1.3519		4
	ETV3	-2.6695		-2.5722	-9.4326	1.1877		4
	SUPT20H	-2.3042		-4.976	-4.5563		-1.8848	4
	TCEB2	-2.2211	-3.1915		-5.7866	-3.1805		4
	MED12	-3.2926		-4.9145	-7.8746		-1.4105	4
	NF1	-7.6291	-1.0039	-11.024	-8.0709			4
	RASGRP1	3.2275		3.795	8.5316			3
	C16orf78	4.8416		5.3345	2.615			3
	LOC100130357	4.0503		3.4755	5.0034			3
	NTNG2	4.1653		4.6869	1.4822			3
	SPATA31A1		2.5323			3.2479	2.9047	3
	FBXO41	3.145		3.4585	2.0081			3
	FOXP4		1.2401		4.2805		2.0598	3
	DPCD	3.0013		3.2081	1.7092			3
	RHOG	2.9015		3.418		1.128		3
	P2RY2				2.369	1.7758	3.109	3
	ANAPC16	2.8848		2.1461	1.7021			3
	CSF1R	2.0814		2.4167	1.207			3
	CRB2		1.5267			1.2671	1.5581	3
	KLF10		-2.4742		3.7839	-2.3995		3
	SOX4		-1.2326			-1.1621	-1.3297	3
	CXXC1	-1.3695	-1.3805			-1.3857		3
	RBM47	-1.1932	-1.6461			-1.3577		3
	CAB39		-1.2085	-4.2261		-1.4292		3
	LCMT1		-1.4503			-1.1759	-1.8058	3
	UBE2F		-1.1922			-1.5852	-1.8731	3
	FAM49B	-1.3696	-1.6699			-1.7111		3
	PEX2		-1.1259	-2.5029		-1.1547		3
	USP7	-2.2479	-1.2736			-1.2953		3
	DDA1		-1.9087			-1.6597	-1.7645	3
	TRRAP		-1.8324			-1.7928	-1.7633	3
	TADA1	-2.3311		-3.64	-5.9751			3
	BTAF1		-2.0646			-1.5175	-2.1135	3
	DR1		-1.8098			-1.9503	-1.938	3
	PPP2R4		-1.9998			-2.0508	-1.6766	3
	PEX3	-1.8015		-2.8988		-1.0275		3
	PPP4C		-1.7521			-1.964	-2.2349	3
	LZTR1	-2.3945	-1.0801	-2.5633				3
	NIP7		-2.102			-2.5462	-1.5691	3
	CUL3	-2.7158	-1.987			-1.5632		3
	RIPK4	-2.1578		-1.4963	-2.7194			3
	TWISTNB		-2.2859			-1.7993	-2.2902	3
	NIFK		-2.4847			-2.44	-1.4721	3
	CARM1	-3.4323		-4.8871			1.4833	3
	FHL2	-1.097		-1.9307	-3.8214			3
	DPH5		-1.6917	-3.3472		-1.9445		3
	TXNRD1		-2.6195			-2.371	-2.4767	3
	ERF	-1.307		-2.0683	-4.1176			3
	PLEKHH3	-1.5735		-1.77	-4.2782			3
	CDC42	-2.3118		-3.3541			-2.0029	3
	DET1	-2.4326		-3.128	-3.7897			3
	DPH2	-1.974	-1.1093	-4.9576				3
	SBNO2	-1.7497		-2.5579	-3.806			3
	UBE2M		-3.2667			-3.6477	-1.6294	3
	WWC1	-2.0722		-2.5871	-4.1477			3
	ASH2L		-2.9979			-2.9356	-1.5358	3
	SGK223	-2.0685		-1.4792	-5.6166			3
	DYNLL1		-1.674		-6.1031	-1.4175		3
	RALGAPB		-2.2432		-5.2638	-2.2018		3
	CDC42BPB	-1.7525		-2.8936	-5.3217			3
	SUPT7L	-1.4268		-2.2841	-6.3561			3
	BCL2L11	-1.4666		-1.7132	-7.0403			3
	ARIH2		-1.8783		-6.9858		-1.4125	3
	PDCD10	-3.1924		-3.396	-4.2864			3
	TAF6L	-2.425		-3.4462	-5.2271			3
	TADA2B	-2.7364		-4.5214	-4.3644			3
	TAF5L	-2.285		-3.7229	-6.6512			3
	EP300	-1.4728		-2.7942	-8.6754			3
	BAX	-2.0999		-2.4251	-8.4692			3
	MED15	-3.0808		-3.9317	-6.1639			3
	PBRM1	6.018		6.2366				2
	FOSB	6.2213		5.9311				2
	SF3A3	5.2574		6.086				2
	SSTR4			4.6255	5.9363			2
	S100A12	5.2055		5.2785				2
	DTX4	4.8681		5.0309				2
	FITM1	4.5037		5.2096				2
	PDGFRB	2.2824		7.3209				2
	CYP7A1	4.68		4.8132				2
	GOLGA8N	4.3295		5.0143				2
	GPR126	4.3242		4.5899				2
	TXK	4.0173		4.7531				2
	TEAD3	4.1067		4.2499				2
	GNB2	3.8921		4.4006				2
	RPL34	4.0021		4.1477				2
	DYNC2H1		1.0711		6.3024			2
	MRPS24	3.2629		4.0605				2
	KDR	3.2931		3.807				2
	GNAQ	3.2883		3.4345				2
	UROC1	4.1284		4.7101				2
	SF3B6	3.3133		3.4019				2
	FRAT1	3.3761		3.2754				2
	FAM120A		2.3315			4.3196		2
	DAPP1	2.8657		3.7465				2
	PHB	2.9756		3.2927				2
	PNMA3		1.3292		4.8005			2
	CD6	3.0368		3.0443				2
	MRC2					2.2609	3.4025	2
	MAML2		2.5797			3.0065		2
	SRC	2.6511		2.8168				2
	TSEN2	2.8168		2.6084				2
	INSL6	2.7858		2.619				2
	PMCH	2.6731		2.6748				2
	RASGRP3	2.6204		2.7055				2
	ITGB4	2.5865		2.6732				2
	ATF3	2.4411		2.6747				2
	WNT16	3.2566		1.8572				2
	SRF	2.1721		2.5231				2
	AMIGO2		2.6714			1.95		2
	KIAA0922		2.1395			2.3763		2
	PKN2		2.4385			2.0515		2
	RGPD5	2.2704		2.1962				2
	ATP10A		2.2972			2.1528		2
	KMT2C		2.1641			2.2131		2
	FGF1	2.3916		1.8971				2
	PPAPDC3		2.309			1.9274		2
	C17orf50		2.2367			1.9877		2
	ATP8B1		1.9024			2.2806		2
	TXN2		1.9362			2.0111		2
	PIK3CD		2.0105			1.8532		2
	LRRFIP1	1.3607		2.1539				2
	CCND1		1.4675			1.8681		2
	ME3	1.7925		1.5368				2
	NKAIN2		1.4491			1.8749		2
	JAG1		1.6584			1.5356		2
	PTPRK		1.3238			1.8589		2
	MAGEB2	1.4343		1.7				2
	MLNR		1.4299			1.656		2
	PROCR		1.4128			1.601		2
	IGSF8		1.6718			1.2931		2
	MGC57346-CRHR1		1.2899			1.5778		2
	RBCK1		1.0597			1.5936		2
	ADGB		1.2551			1.3796		2
	FAM195B		1.0514			1.5473		2
	AIM1L					1.1913	1.3956	2
	NAP1L1		1.1017			1.4672		2
	HAS2		1.3033			1.2533		2
	FAM105A		1.1941			1.3381		2
	PDZRN3		1.2615			1.2506		2
	DCAF12L1		1.2369			1.2395		2
	RPS6KA4		1.0294			1.3936		2
	ROR2		1.0143			1.3073		2
	MCM4					1.1582	1.7844	2
	CLIC5	-1.7289			2.9998			2
	ELF3		-1.3235			-1.2456		2
	TMEM79			-1.9254			1.7728	2
	S100A1				-3.9483		2.1313	2
	MCAT	-1.0275				-1.0293		2
	IPO9		-1.0679			-1.0448		2
	AP2S1		-1.025			-1.1056		2
	MCM6		-1.0472			-1.0947		2
	NELFB		-1.1427			-1.0078		2
	NOP56		-1.0765			-1.0756		2
	CHMP7		-1.1119			-1.0801		2
	PET112		-1.06			-1.1573		2
	NDUFAB1		-1.0074			-1.2398		2
	SMC1A		-1.1622			-1.0923		2
	ADAT3		-1.1096			-1.1491		2
	DDX49		-1.2471			-1.0181		2
	AASDHPPT		-1.1119			-1.16		2
	AP2M1		-1.1132			-1.1737		2
	PES1		-1.0861			-1.203		2
	FDXR		-1.1128			-1.1836		2
	MCMBP		-1.1654			-1.152		2
	ELAVL1		-1.2635			-1.0541		2
	PDCD2		-1.2294			-1.0882		2
	AARS2		-1.2252			-1.1166		2
	RRP9		-1.197			-1.1544		2
	AHR		-1.076			-1.3017		2
	RRP1		-1.2542			-1.1355		2
	JPH1		-1.3375			-1.0697		2
	C18orf21		-1.1474			-1.2697		2
	GEMIN2					-1.0644	-1.354	2
	MRPL38		-1.2202			-1.2034		2
	DHPS		-1.2869			-1.1375		2
	RPL4		-1.3064			-1.119		2
	MRPS34		-1.2435			-1.1828		2
	DNLZ		-1.1957			-1.2355		2
	PWP2		-1.1676			-1.2664		2
	HEATR1		-1.2273			-1.2113		2
	ILF3		-1.2879			-1.1509		2
	PA2G4		-1.0596			-1.3825		2
	WDR55		-1.2625			-1.194		2
	NUDCD3		-1.3043			-1.1626		2
	WDR74		-1.1553			-1.3135		2
	MARS2		-1.3388			-1.1305		2
	AAGAB		-1.1565			-1.3379		2
	RPLP0		-1.3531			-1.1469		2
	POLR1E		-1.1807			-1.3265		2
	TAF3		-1.0518			-1.4595		2
	CTU2		-1.1678			-1.354		2
	RDH10		-1.1743			-1.3537		2
	COPS4		-1.1798			-1.3551		2
	CTU1		-1.4677			-1.0938		2
	RPL23		-1.2431			-1.3299		2
	SUPT5H		-1.2981			-1.2789		2
	ELP5		-1.2334			-1.3441		2
	RAB35		-1.2378			-1.3489		2
	UBTF		-1.6029			-1.0082		2
	PSMG2		-1.3848			-1.253		2
	SPATA5L1		-1.4652			-1.1757		2
	LSM11		-1.411			-1.231		2
	GNB1L		-1.0801			-1.5628		2
	ELP6		-1.4764			-1.1701		2
	ARMC7		-1.3909			-1.2563		2
	PEX26	-1.0976		-1.5707				2
	TEN1		-1.0834			-1.5982		2
	LSM12		-1.0129			-1.6751		2
	MED29		-1.3161				-1.3736	2
	AMOTL2	-1.1888		-1.5052				2
	RRS1		-1.5			-1.1977		2
	NCAPH2		-1.2683			-1.4429		2
	WDR83		-1.4251			-1.2946		2
	PTDSS1		-1.6092			-1.1187		2
	TEFM		-1.2073			-1.5584		2
	GLRX3					-1.3097	-1.4607	2
	ZIC2	-1.5223		-1.25				2
	UFSP2		-1.4388			-1.3397		2
	MOCS3		-1.384			-1.3983		2
	DDIT4	-1.3024					-1.4835	2
	PGK1		-1.349			-1.4421		2
	LANCL2		-1.7512			-1.0467		2
	DIS3		-1.5316			-1.2848		2
	PPAN		-1.3133			-1.5143		2
	HOMER2	-1.1917		-1.6418				2
	RSL1D1		-1.8112			-1.4328		2
	RAD50		-1.5569			-1.2848		2
	DDX55		-1.5759			-1.3077		2
	SPATA5		-1.6722			-1.2168		2
	SIRT6	-1.3618		-1.5436				2
	PELO		-1.5864			-1.3234		2
	RPF2					-1.5864	-1.334	2
	MRTO4		-1.5783			-1.3434		2
	PFN1		-1.5831			-1.3456		2
	TRMT112		-1.1273			-1.8354		2
	SUZ12		-1.1758			-1.8063		2
	TIPRL		-1.5409			-1.4417		2
	CINP		-1.2467			-1.7415		2
	POT1					-1.1556	-1.8339	2
	IKBKAP		-1.2247			-1.7775		2
	USP9X		-1.4326			-1.5792		2
	BCR	-1.2166		-1.8043				2
	NAA20		-1.0767			-1.9445		2
	TPI1		-1.7002			-1.3283		2
	C9orf114		-1.3562			-1.7162		2
	ZNHIT3		-1.3654			-1.7475		2
	C2orf49		-1.4095			-1.7407		2
	RPL11		-1.5358			-1.6157		2
	TTC4		-1.7342			-1.4318		2
	SEH1L		-1.7239			-1.4509		2
	DDX1		-1.4521			-1.7347		2
	WDR77		-2.069			-1.1464		2
	UTP23		-1.2762			-1.9545		2
	METTL1		-1.7076			-1.5365		2
	PMVK		-1.4891			-1.7714		2
	ATP1A1		-1.4821			-1.7918		2
	COPS5		-1.4202			-1.8837		2
	MGA	-1.4566		-1.8645				2
	DDX54		-1.8994			-1.425		2
	NFIB	-1.3103		-2.0144				2
	PEX10	-1.4685		-1.8834				2
	DPH6		-2.0429			-1.7107		2
	CRYBB3	-1.3285		-2.0363				2
	NR2C2AP		-1.805			-1.5602		2
	NOB1		-1.4872			-1.8856		2
	MAGI1	-1.5392		-1.8468				2
	SLC25A26		-1.4051			-1.9901		2
	RPL13A		-1.8309			-1.5898		2
	TRMT61A		-1.827			-1.5994		2
	THG1L		-1.5021			-1.9283		2
	MIDN	-1.1204		-2.3184				2
	NLE1		-1.9993			-1.4439		2
	NDNL2		-1.9262			-1.5348		2
	MYO18B	-1.5172		-1.9899				2
	PROSER2	-1.3317		-2.1779				2
	EXOSC4		-1.5519			-1.9786		2
	CENPA		-1.0237			-2.5517		2
	RPLP2		-1.9303			-1.6485		2
	TMA16					-1.0858	-2.4935	2
	HTR3A	-1.5223		-2.08				2
	SEPT1	-1.052		-1.8101				2
	BRD2	-1.8277		-2.4518				2
	ZNF281	-1.5989		-2.0508				2
	FAM96B		-1.7205			-1.9312		2
	DPY30		-2.1004			-1.5802		2
	GSKIP	-1.1788		-2.5119				2
	RBM15	-1.5669		-2.1298				2
	FRMD6	-1.4179		-2.2803				2
	KAT7		-1.9678			-1.7613		2
	VGLL4	-1.3576		-2.4135				2
	DNAJC9		-1.9394			-1.8516		2
	UBA3		-2.024			-1.7846		2
	SHB	-1.6016		-2.2351				2
	HSCB		-1.8725			-1.9675		2
	HSPA13		-2.099			-1.7428		2
	SPNS1		-1.0651	-2.7857				2
	NHP2		-2.0159			-1.8388		2
	SUV420H1	-1.5975		-2.2591				2
	C1orf27		-1.8046			-2.0578		2
	VEZT		-1.9467			-1.9303		2
	SHROOM3	-1.3538		-2.5452				2
	PFKFB3	-1.5517		-2.3672				2
	HS6ST2	-1.5573		-2.3817				2
	SIAH1	-1.5457		-2.4035				2
	FTSJ3		-2.2146			-1.7714		2
	GTF2H3		-1.8916			-2.1066		2
	NAE1		-2.1902			-2.832		2
	NR2C2	-1.8155		-2.2166				2
	EIF6		-2.001			-2.0356		2
	MAZ			-1.0958	-2.9823			2
	TTI2		-1.7473			-2.3485		2
	NFAT5	-1.9346		-2.1986				2
	NUP43		-1.745			-2.4183		2
	STK40	-1.9605		-2.2095				2
	TELO2		-2.0459			-2.1277		2
	NOL9		-2.2083			-2.0285		2
	RNF20		-2.1341			-2.1098		2
	CAPZB		-2.1237			-2.1647		2
	DDX51		-1.9741			-2.3338		2
	CRB3	-1.5062		-2.8169				2
	NOP16		-2.3857			-1.9578		2
	JUND	-1.8812		-2.4958				2
	FOSL2	-1.426		-2.9712				2
	MAP3K1	-1.4353		-2.9789				2
	FARSB		-1.9811			-2.4878		2
	PIAS1	-1.6962		-2.8101				2
	ARHGAP17	-1.2902			-3.22			2
	TCEB1		-2.4558			-2.0921		2
	RFWD2	-2.0079		-2.5479				2
	DKC1		-2.3964			-2.2132		2
	TIMM9		-1.9879			-2.6282		2
	C1orf172	-2.0909		-2.5334				2
	FNTB		-2.5722			-2.06		2
	SDAD1		-2.5891			-2.094		2
	MED23				-3.7049	-1.0057		2
	TPT1		-2.0529			-2.6631		2
	WDR18		-2.285			-2.4444		2
	ADRBK1	-2.1549		-2.5779				2
	DPH3		-2.3827			-2.4067		2
	THAP11	-2.1103		-2.6974				2
	DAB2IP			-1.5362	-3.2753			2
	AJUBA	-2.3747		-2.5366				2
	TINF2		-2.5095			-2.5013		2
	NMD3		-2.1772			-2.8562		2
	SPRED2	-2.3279		-2.7333				2
	MMS19		-2.6209			-2.463		2
	CNOT4	-2.5854		-2.5513				2
	SPRED1	-2.1051		-3.047				2
	YWHAZ	-1.9641		-3.2273				2
	LIMK2	-2.4425		-2.7506				2
	DHX33		-2.4038			-2.8053		2
	MPP5	-2.4123		-2.8332				2
	DNTTIP1	-1.889		-3.3581				2
	TAOK2	-2.3505		-2.9056				2
	PHF10	-2.4634		-2.8171				2
	GTPBP4		-2.6104			-2.6856		2
	CASP9	-1.6865			-3.6159			2
	IFI27			-1.0082	-4.3601			2
	CBFB				-4.2834	-1.1283		2
	UBE2L3				-3.3714		-2.0908	2
	GNL3		-2.6807			-2.8375		2
	C1orf109		-2.6505			-2.9298		2
	GATA6	-2.5895		-3.0169				2
	METAP1		-2.9612			-2.7415		2
	RAB40C			-1.8042	-3.9065			2
	C11orf73	-2.0466		-3.6739				2
	THBS3	-1.0484			-4.7037			2
	ANKRD39			-1.7474	-4.0563			2
	PAK1IP1		-3.0312			-2.8661		2
	APAF1	-1.2858			-4.6706			2
	PLEKHA1	-1.2431			-4.7232			2
	SMARCE1				-4.7356	-1.2473		2
	ATMIN	-1.2332			-4.7635			2
	MYL6	-2.7988		-3.2035				2
	EFNA3			-2.296	-3.8801			2
	LAS1L		-3.5497			-2.8009		2
	PPM1F	-3.0274		-3.4172				2
	GRWD1		-3.3834			-3.1233		2
	PTPN12	-3.0749		-3.5164				2
	DAPK3	-2.5204		-4.391				2
	CBLB	-2.7198		-4.1924				2
	CREBBP	-1.8714			-5.1453			2
	RASSF3				-5.0236	-1.9973		2
	ACTR10		1.1158		-8.27			2
	ROCK2	-2.8082		-4.4075				2
	SETDB1	-3.8377		-3.4682				2
	HCCS	-2.303			-5.0043			2
	PAWR	-2.9283		-4.4052				2
	LATS2			-2.3032	-5.4675			2
	HIVEP1	-2.9563		-4.8813				2
	KIAA0907	-3.4773		-4.8139				2
	WDR82				-7.0965	-1.2315		2
	RARG	-1.7385			-6.7239			2
	RASA1	-4.0687		-5.0472				2
	CIC	-5.2559		-6.6094				2
	GCM1				7.9203			1
	HRC				7.7009			1
	ATP5O	7.5942						1
	ARL4C				6.8589			1
	TNNC1				6.6367			1
	OR10V1				6.58			1
	CYBA			6.1297				1
	SRMS				6.0965			1
	DMBT1				5.7181			1
	MYO5B				5.6303			1
	EEF1A1				5.6162			1
	SPDYC				5.5681			1
	SEMG2				5.4651			1
	CD93				5.4605			1
	NTSR2			5.395				1
	ALOX15B	5.3426						1
	JUN				5.2306			1
	TREX1				5.1415			1
	UHRF1BP1L				4.9206			1
	C3orf36	4.8467						1
	RNF112	4.6808						1
	TPPP				4.6728			1
	PRKCD	4.6105						1
	GSTA5				4.6007			1
	TSPAN32				4.5499			1
	APOBEC3H				4.5437			1
	TANC2			4.5407				1
	GRINA	4.5387						1
	ZNF526			4.4716				1
	WASL			4.388				1
	DCC				4.3646			1
	TEX36	4.3276						1
	WDR26			4.2752				1
	RPS6KL1				4.1263			1
	AIF1L				4.0753			1
	CBFA2T2				4.0187			1
	SUPT4H1				4.0131			1
	RBMY1B			3.9929				1
	PNRC1	3.9622						1
	NDRG1	3.9333						1
	SOX13				3.8781			1
	XG				3.8513			1
	OSBPL7				3.8509			1
	PRRG2			3.8385				1
	PQLC2L	3.8293						1
	SLC35B4				3.8079			1
	GOLGA1				3.7639			1
	PLXNB3	3.7224						1
	IL10RB				3.6903			1
	C2orf61						3.6507	1
	BCL3				3.6355			1
	ZNF202				3.5756			1
	CDK9			3.5513				1
	SIRT2			3.5049				1
	TRPC4AP				3.5032			1
	FERMT1				3.4511			1
	TRNT1						3.4438	1
	CYP11A1			3.4384				1
	C7orf31				3.3978			1
	STKLD1					3.3824		1
	CYB5D2				3.3815			1
	NT5C1A	3.3753						1
	SERPINF1			3.3731				1
	ZNF180				3.3091			1
	GCKR				3.2977			1
	ANLN						3.24	1
	TSC22D4			3.2183				1
	SAMHD1				3.201			1
	GRIN1				3.1991			1
	DLL4				3.1757			1
	ALDH7A1				3.1545			1
	TMEM184A			3.1453				1
	RASGRF2	3.0285						1
	WIPI2				3.0233			1
	COL4A2				2.9911			1
	CCND3			2.9843				1
	C21orf59				2.9732			1
	RHOV				2.9694			1
	OR5H6						2.9288	1
	BCAS3				2.9207			1
	SATB1				2.9143			1
	TSSK1B					2.9111		1
	FAHD1				2.911			1
	KIAA0040				2.8948			1
	PDCD4				2.893			1
	CHURC1-FNTB	2.8749						1
	ENO4	2.8742						1
	ABCG2	2.8703						1
	FAM227B				2.8502			1
	KRT77				2.8387			1
	LRRC8A				2.7947			1
	OS9			2.7883				1
	AGO3						2.7442	1
	ARHGAP20				2.7375			1
	C9orf171						2.7122	1
	MAPK9				2.6925			1
	KHSRP			2.6569				1
	RPS4Y1				2.6279			1
	MGAT3				2.6243			1
	AVPR2			2.6209				1
	CHRNA5						2.6155	1
	PTP4A2				2.6113			1
	ATPAF1				2.5642			1
	MAATS1						2.5623	1
	KCNK9		2.5307					1
	SEC61B	2.5302						1
	CYP21A2			2.5063				1
	EFNA5						2.4927	1
	KIAA0895				2.4914			1
	GCFC2			2.4752				1
	AGTR1			2.4717				1
	ZNF106				2.4668			1
	SLC25A13						2.4337	1
	EI24						2.424	1
	TEX264	2.3839						1
	ZNF677						2.3813	1
	KIAA1324L			2.3743				1
	ARL6IP5						2.3482	1
	MFSD12			2.339				1
	MAP3K8						2.3171	1
	DAZAP2					2.3162		1
	OR2A1				2.2873			1
	B3GNT5					2.2185		1
	NDUFAF6	2.2084						1
	PPY						2.2081	1
	RPL9						2.1909	1
	YAP1				2.1731			1
	CCT6A		2.1717					1
	SLC9A9						2.1691	1
	UCP1					2.1689		1
	TMEM237			2.168				1
	EXO1	2.1668						1
	LOC100129083						2.12	1
	C6orf222						2.1093	1
	CYP4F12	2.0592						1
	MCL1						2.0382	1
	PAOX					2.0239		1
	PDZD8	2.0053						1
	ERGIC2						1.9976	1
	TMSB10						1.9965	1
	COL20A1					1.9941		1
	C7orf57						1.9864	1
	SBDS						1.9666	1
	NBPF11				1.9555			1
	MORF4L2				1.9547			1
	HSPB9						1.9294	1
	ZNF653		1.9248					1
	SLC35E2B						1.9091	1
	MEAF6						1.9002	1
	SLC28A2		1.8705					1
	CNKSR3		1.8681					1
	FLRT2					1.8443		1
	COL5A2					1.837		1
	RABL2B						1.8369	1
	LACE1						1.8136	1
	FIGN						1.7988	1
	CYP17A1						1.7927	1
	EPN2						1.7746	1
	CCDC122		1.7705					1
	RAB4A						1.7405	1
	PIM2						1.7383	1
	DEGS2		1.6958					1
	ERBB2	1.6827						1
	SLC33A1						1.6805	1
	VPS37B		1.6769					1
	RHD		1.6635					1
	EEF1D	1.6539						1
	DNAJB1					1.6443		1
	MED12L				1.6122			1
	LRRCC1						1.6081	1
	RBM26						1.6057	1
	FGFR1				1.5983			1
	CALB2						1.5964	1
	KDM5A			1.5816				1
	KLF13					1.5624		1
	MYBPC3						1.5526	1
	FTH1						1.5483	1
	OR10Q1					1.537		1
	TNP1				1.5324			1
	PSMA4						1.5297	1
	GLI3					1.501		1
	TRIM40						1.4901	1
	PHOSPHO2						1.4802	1
	JADE3						1.4683	1
	GRAMD1A		1.4591					1
	MAP3K9				1.4534			1
	ANKUB1					1.4389		1
	PODNL1	1.4297						1
	DOCK9						1.4122	1
	TMEM117						1.412	1
	FKBP2				1.3932			1
	COPZ2		1.3922					1
	BCL2L1						1.386	1
	PPP1CA		1.3695					1
	CTDNEP1						1.3659	1
	SQSTM1					1.3648		1
	SNAPC3					1.3459		1
	FBRS						1.3339	1
	FZD9					1.3267		1
	UPF1					1.3222		1
	SMAD6					1.3092		1
	CCDC71L					1.2909		1
	IDI2					1.2792		1
	HNRNPH2		1.2787					1
	RASGRP4	1.2689						1
	SETD5		1.2485					1
	COL24A1					1.2383		1
	CRHR1					1.2117		1
	NUP98		1.2073					1
	MPG				1.2005			1
	CSRNP1		1.1965					1
	PANK4					1.1958		1
	TPK1					1.1929		1
	P2RX4		1.1884					1
	OR3A2					1.1836		1
	ZNF358		1.1806					1
	ANKIB1					1.1779		1
	TREML1	1.1776						1
	ERMN			1.1767				1
	C11orf44					1.157		1
	ZNF783					1.1463		1
	DSCAM					1.142		1
	CAMKV					1.1381		1
	PTPRS		1.1237					1
	CDH11		1.1181					1
	OSTM1		1.1118					1
	OR6X1		1.102					1
	ELOVL4		1.0825					1
	COL8A1					1.0803		1
	RDH12					1.0669		1
	SPRYD4		1.0653					1
	HPCAL4		1.0638					1
	CYTH3		1.042					1
	HIF1AN		1.0347					1
	TNNI3		1.033					1
	TUBB3		1.0305					1
	CPLX2		1.0275					1
	KIF13B		1.0264					1
	ZNF554				1.0262			1
	TUSC5					1.0247		1
	DUSP12				1.0208			1
	NBPF1					1.0167		1
	CRABP1		1.0045					1
	H2AFZ		1.842					1
	PEX13					-1.0344		1
	TFAP2C				-6.0873			1
	CYB5R4		-1.0029					1
	VN1R2					-1.0047		1
	ESRP1					-1.0048		1
	ZNF397	-1.0068						1
	ALKBH5	-1.0106						1
	GRHL2		-1.0137					1
	PHF12	-1.0177						1
	POP4					-1.022		1
	C21orf91					-1.0223		1
	MRP63					-1.0235		1
	HIST1H3C	-1.0247						1
	UBE2E1	-1.0279						1
	EMC3					-1.0296		1
	METTL16					-1.0321		1
	URM1		-1.0351					1
	NPEPPS		-1.0366					1
	MMP26	-1.038						1
	SSRP1		-1.0401					1
	LAT	-1.0417						1
	RCN2	-1.045						1
	UFC1					-1.0462		1
	TGM3			-1.0471				1
	URB2		-1.0478					1
	THAP7	-1.0503						1
	BOP1					-1.0573		1
	SHQ1		-1.0627					1
	CCDC92	-1.0631						1
	MRPL32		-1.0651					1
	TSSK6	-1.0744						1
	QPRT	-1.0751						1
	OIP5					-1.0753		1
	CCDC17	-1.0763						1
	SMARCA4		-1.0721					1
	SAE1		-1.0809					1
	CTNNBL1		-1.0837					1
	SARS2					-1.0838		1
	C1QTNF8	-1.0867						1
	GPX1			-1.0879				1
	CNOT3		-1.0887					1
	NELFCD					-1.0891		1
	TRPM7					-1.0894		1
	URGCP-MRPS24		-1.0895					1
	YWHAH			-1.0911				1
	ELP4					-1.0976		1
	RMI2		-1.0987					1
	FLYWCH1	-1.1048						1
	SLC14A2	-1.1066						1
	MPHOSPH10		-1.1073					1
	ACTB					-1.108		1
	UBL4B	-1.1098						1
	DUSP4	-1.1104						1
	HDAC2	-1.1117						1
	TRMT6		-1.1121					1
	CEBPZ					-1.1171		1
	RAD51D					-1.1198		1
	F8A3	-1.121						1
	DGKD		-1.1225					1
	SLC25A37	-1.1226						1
	HMGXB4	-1.1229						1
	NFKBIZ	-1.1244						1
	CGREF1	-1.1256						1
	SDCCAG3			-1.1258				1
	KIF20B					-1.1276		1
	TMPRSS9			-1.1281				1
	SMC5					-1.1302		1
	DCTN6					-1.1313		1
	S100A7A				-6.8602			1
	TAOK1			-1.1354				1
	ATP5J2					-1.1385		1
	TMEM65	-1.1392						1
	DUSP1	-1.1418						1
	DCLRE1B		-1.1437					1
	MRGBP		-1.1437					1
	ADAM10	-1.1469						1
	HUS1		-1.1484					1
	TGIF1					-1.1484		1
	GNAZ	-1.1493						1
	CNOT1		-1.1507					1
	MRPL45					-1.1581		1
	DTYMK					-1.1583		1
	ZNF280A	-1.1598						1
	ZNF83					-1.1647		1
	RPL28		-1.1665					1
	ELP2					-1.1684		1
	ZNF280C	-1.1691						1
	MRPS21		-1.1694					1
	VSNL1	-1.1718						1
	GDF7	-1.1736						1
	FABP12					-1.1758		1
	SNRPA					-1.1797		1
	PPP2CA		-1.1893					1
	TTI1		-1.192					1
	RASA2					-1.1954		1
	CLASRP		-1.1964					1
	AATF					-1.1979		1
	CDKN2A			-1.2013				1
	SH3BP5			-1.2051				1
	SMARCA5					-1.2076		1
	NARG2		-1.2086					1
	NSMCE2		-1.2102					1
	DIMT1					-1.2123		1
	TGFBR2	-1.2124						1
	UTP15					-1.4312		1
	MYBBP1A		-1.226					1
	TMED10					-1.2267		1
	BIRC6		-1.227					1
	TBL3					-1.2287		1
	MSGN1	-1.2293						1
	ABT1					-1.2335		1
	FAM98B					-1.2377		1
	PRPF4	-1.2411						1
	KRT18	-1.2428						1
	ZSWIM6	-1.2448						1
	RTEL1		-1.2481					1
	CENPW		-1.2711					1
	FXR1	-1.2519						1
	FRYL	-1.2531						1
	GTF3C5					-1.2538		1
	ORC2					-1.2557		1
	SZT2	-1.2625						1
	TUFM					-1.2628		1
	NOL12		-1.2703					1
	F11R	-1.2723						1
	GUK1		-1.2724					1
	TMEM222	-1.2755						1
	TNP2			-1.2788				1
	TSPAN14	-1.2831						1
	PWP1		-1.2924					1
	CPSF3					-1.2928		1
	NSMCE1		-1.3009					1
	HLA-DMB	-1.3079						1
	FCHO1	-1.3098						1
	MARS		-1.3108					1
	XYLB	-1.317						1
	CEP68	-1.3186						1
	WDR6	-1.3194						1
	NDUFV3			-1.322				1
	RASSF7	-1.3253						1
	TFPT						-1.3255	1
	HJURP					-1.326		1
	SOX7	-1.328						1
	TRIB1	-1.329						1
	NOSIP		-1.3298					1
	TSC22D3	-1.3311						1
	TOB2	-1.3328						1
	DDX27						-1.3347	1
	NEUROD1	-1.3363						1
	TNFAIP3						-1.3414	1
	TEX10		-1.3426					1
	SMEK1						-1.3429	1
	AKIP1	-1.3468						1
	GUCD1			-1.3531				1
	RPL7A						-1.3532	1
	H1FOO			-1.355				1
	IMPA1					-1.3622		1
	FFAR4	-1.3634						1
	DPH7	-1.3652						1
	LDB1			-1.3752				1
	NCL					-1.3757		1
	CRYBB2			-1.3797				1
	MAP2K1				-1.3852			1
	SULT1A2			-1.3902				1
	PRRC1		-1.3903					1
	CRISPLD1			-1.3932				1
	YEATS4					-1.402		1
	EIF4E2						-1.4046	1
	ADRBK2	-1.4074						1
	FBXO11						-1.4144	1
	SHC4	-1.4158						1
	CFLAR						-1.4204	1
	RGL4			-1.4204				1
	PLK4		-1.421					1
	ARHGEF10L	-1.4231						1
	MRE11A						-1.4233	1
	LEAP2	-1.4243						1
	NOC2L					-1.4244		1
	CHRNB2			-1.427				1
	IMP3		-1.4313					1
	RBBP4		-1.4362					1
	RPL36					-1.4368		1
	TAF1C					-1.444		1
	UBA5		-1.4455					1
	SEZ6L2			-1.4523				1
	SCAP					-1.4525		1
	DUSP7			-1.4551				1
	IZUMO4			-1.4598				1
	PSMA1					-1.4611		1
	DDX56		-1.4624					1
	WDR61					-1.466		1
	RPS11					-1.4701		1
	MRPS6					-1.4736		1
	CHKB			-1.4802				1
	LOXHD1			-1.4895				1
	MEIS2	-1.4966						1
	MYL12B			-1.8248				1
	CYP2D6			-1.5096				1
	RBM10						-1.5126	1
	MAT2A					-1.5189		1
	SEZ6L			-1.5221				1
	ANO9			-1.5231				1
	AURKB						-1.525	1
	IRF6	-1.5312						1
	MARCH2	-1.5378						1
	ASAP2	-1.5401						1
	CCS						-1.543	1
	POLR3H					-1.5537		1
	BRD4						-1.5631	1
	PGAM5			-1.5647				1
	OMP			-1.5674				1
	SOCS5	-1.5675						1
	ACTR8		-1.572					1
	ELMSAN1	-1.5736						1
	OXSM					-1.5737		1
	FAM110D			-1.5754				1
	CPSF4					-1.5826		1
	VARS2		-1.5826					1
	CDKN2B	-1.5837						1
	ZBTB48			-1.5904				1
	PRDM15			-1.5929				1
	SAFB	-1.5933						1
	PPP2R2A						-1.5939	1
	LATS1	-1.5977						1
	PDS5B	-1.606						1
	COL17A1			-1.6062				1
	TOMM22					-1.6171		1
	CLSTN1			-1.6173				1
	CDPF1				-1.619			1
	ZBTB8OS						-1.6236	1
	NVL		-1.639					1
	EXOSC1					-1.64		1
	GEMIN4					-1.6403		1
	CHEK2	-1.6718						1
	GDF15	-1.6736						1
	DSTN		-1.675					1
	DCTPP1			-1.6982				1
	TXLNA			-1.7056				1
	RPL37A					-1.7063		1
	MRPS26	-1.7122						1
	YPEL3	-1.7172						1
	LMO7			-1.7183				1
	RNF214	-1.7187						1
	C5orf64			-1.7198				1
	C9orf41						-1.7249	1
	ELP3					-1.7301		1
	GAL3ST1			-1.7377				1
	WDR13			-1.7402				1
	SFXN4	-1.7476						1
	NOL6		-1.7483					1
	LONP1						-1.7518	1
	TARDBP						-1.7551	1
	SIRT1						-1.757	1
	TCF3			-1.7593				1
	GNB2L1		-1.7648					1
	LUC7L3					-1.7772		1
	CCDC85C			-1.7838				1
	ITPRIPL2	-1.7937						1
	RNF185			-1.8009				1
	FBXL20	-1.8109						1
	ARHGAP36			-1.8144				1
	DNPEP			-1.8171				1
	SLC25A47			-1.8284				1
	STRAP						-1.8407	1
	USP15	-1.8525						1
	GABPB1						-1.8536	1
	GFM1					-1.8563		1
	MAPRE3			-1.8579				1
	SAP30L			-1.8622				1
	TMSB15A					-1.882		1
	OGT						-1.8821	1
	COPS8					-1.9019		1
	AGO1			-1.9079				1
	HIVEP2			-1.911				1
	RNF146	-1.9168						1
	RPL8					-1.9178		1
	TOMM20					-1.9181		1
	IFT57	-1.9292						1
	GPN3						-1.9358	1
	COX8C			-1.9588				1
	ZNF236	-1.9701						1
	AADAC			-1.9721				1
	HSFX1			-1.975				1
	RPL30		-1.99					1
	DHX15						-1.9933	1
	ACTR6		-2					1
	CCNL1			-2.0024				1
	CTDSPL2	-2.0167						1
	ARHGEF18			-2.0236				1
	HSD17B4			-2.0394				1
	CDC42EP3			-2.0547				1
	INO80D			-2.0711				1
	NEUROG1			-2.0747				1
	PKDREJ			-2.0786				1
	CLUAP1			-2.0811				1
	IRF2BP1			-2.082				1
	GIPC3			-2.0913				1
	RPL18A					-2.1007		1
	WEE1		-2.1033					1
	PQLC2			-2.1054				1
	CDC37	-2.1142						1
	RNMT					-2.1154		1
	FAM161B			-2.1229				1
	WDR48						-2.1263	1
	RFC3		-2.1356					1
	ARMC10			-2.1423				1
	TPM1			-2.1698				1
	CTIF			-2.1783				1
	DOLPP1			-2.1928				1
	NASP		-2.1929					1
	SRSF7						-2.1939	1
	KBTBD7			-2.2037				1
	SGCG			-2.2066				1
	UBASH3B			-2.2139				1
	C19orf53					-2.23		1
	DCAF4			-2.2314				1
	INPP4A				-5.5257			1
	CCDC102B			-2.2449				1
	RREB1			-2.2466				1
	HIST1H3B			-2.2514				1
	LUZP1			-2.2544				1
	LACC1			-2.2672				1
	RBX1		-2.2678					1
	PGP	-2.2729						1
	TMEM189			-2.2885				1
	YWHAQ			-2.2895				1
	ARSA	-2.31						1
	RTCB					-2.3247		1
	ELMOD3			-2.3379				1
	TASP1			-2.3407				1
	NUP160						-2.3602	1
	KCTD18			-2.3619				1
	FAM181A			-2.3645				1
	SRM			-2.4168				1
	RABGGTA				-2.4468			1
	IRF2BPL			-2.4603				1
	TKT	-2.491						1
	XRN1						-2.5294	1
	CNOT10				-2.5318			1
	CHRNA4			-2.5497				1
	EIF2AK2			-2.5523				1
	MBD2	-2.5724						1
	TLE1				-2.573			1
	RPL12		-2.5923					1
	SLC25A3				-2.6271			1
	PTPRF			-2.6368				1
	HIST1H2BL		-2.6434					1
	HIST1H2AL					-2.6469		1
	RPL15		-2.6631					1
	C1D		-2.672					1
	BST2			-2.6887				1
	BPIFB4				-2.689			1
	TOE1					-2.695		1
	DHX29						-2.7486	1
	ARID3A			-2.7678				1
	RIIAD1			-2.8501				1
	RRAGD			-2.8523				1
	SLIRP			-2.8669				1
	ZC3HAV1				-2.8866			1
	OVOL2				-2.9232			1
	STK38				-2.9253			1
	PLCG1	-2.9494						1
	PPAT				-2.9675			1
	TEKT2				-2.9736			1
	NPR1				-2.9835			1
	KLHL12			-3.0482				1
	KCNK13				-3.0586			1
	FBXL5			-3.1034				1
	EFHD1				-3.1432			1
	BCAS4				-3.1448			1
	TRIM42				-3.1508			1
	UBL5					-3.1596		1
	BRAP			-3.1914				1
	ACTR5				-3.2244			1
	TRIM28			-3.2334				1
	CLNK				-3.2816			1
	ZNF787				-3.2934			1
	GOLGB1			-3.3189				1
	DUSP18				-3.3212			1
	CREG2				-3.3289			1
	CNPPD1				-3.3384			1
	INSIG2				-3.3598			1
	C1orf56				-3.4095			1
	FUT11				-3.4223			1
	DESI1				-3.454			1
	LMAN2L				-3.4761			1
	JOSD1				-3.4812			1
	ARID1B				-3.4845			1
	L3MBTL2				-3.5222			1
	ICT1				-3.571			1
	TTC24				-3.5759			1
	EIF4A1			-3.6151				1
	ESRRA				-3.6498			1
	IKBKB				-3.6508			1
	CELSR1				-3.654			1
	EPB41L5				-3.6552			1
	ACSM2B				-3.6809			1
	MSI2				-3.684			1
	PYGL				-3.7171			1
	PRR14				-3.7232			1
	PINX1				-3.7313			1
	GPBP1L1				-3.7379			1
	EPHA8				-3.7447			1
	APOA2				-3.7539			1
	LAMTOR2				-3.7665			1
	SRSF10				-3.7808			1
	NOTCH2NL				-3.8015			1
	ARHGEF11				-3.8076			1
	NFRKB				-6.5996			1
	KRT36				-3.8623			1
	MLF2				-3.8709			1
	BBS2				-3.8736			1
	GABPB2				-3.8779			1
	MED11				-3.8821			1
	CABIN1				-3.9292			1
	BEND7				-3.9536			1
	BCAN				-3.9698			1
	GATAD2B				-3.981			1
	MKNK1				-3.982			1
	CDYL				-3.9847			1
	BAD				-3.9856			1
	OSBP2				-3.9967			1
	TTC14				-4.0272			1
	GAD1				-4.0356			1
	C19orf10				-4.0447			1
	SIPA1L1				-4.1258			1
	CNNM3				-4.1332			1
	ITPRIPL1				-4.1389			1
	RPL32						-4.1407	1
	FOXN1				-4.1461			1
	UNC5A				-4.1823			1
	GATSL3				-4.1884			1
	TFAP4				-4.2862			1
	CMIP				-4.295			1
	GNG7				-4.312			1
	GPX7				-4.325			1
	ARMCX3				-4.3349			1
	CHST10				-4.3407			1
	APOBEC3A				-4.3556			1
	NOG				-4.3731			1
	RFX5				-4.3871			1
	ZNF454				-4.3926			1
	POTEJ				-4.3936			1
	TNFAIP1				-4.3939			1
	INPP5J				-4.4014			1
	APOBEC3C				-4.4208			1
	RNF135				-4.4274			1
	GGA1				-4.4401			1
	LCE3C				-4.4424			1
	MUL1				-4.4609			1
	ATP2B4				-4.4986			1
	ZMAT5				-4.5172			1
	ACR				-4.5197			1
	RAD54L2				-4.5306			1
	SCG5				-4.5385			1
	SNN				-4.5503			1
	FAM189B				-4.5512			1
	ASTL				-4.5923			1
	LONRF1				-4.6152			1
	GNB1				-4.6204			1
	CARD10				-4.625			1
	MED1				-4.632			1
	KCNIP3				-4.6329			1
	SCTR				-4.649			1
	ADIPOR2				-4.6521			1
	HAPLN2				-4.6865			1
	KIAA1211L				-4.7068			1
	RTF1				-4.7138			1
	C5orf22				-4.7652			1
	CSF2RB				-4.8056			1
	NPDC1				-4.8434			1
	TMEM161A				-4.8496			1
	MARCKS				-4.876			1
	SAR1A				-4.8807			1
	RFX8				-4.8859			1
	RAX2				-4.8873			1
	TBL1XR1				-4.9172			1
	LLGL2				-4.9536			1
	MIEF1				-4.9556			1
	IKBKG				-4.9607			1
	MED16				-4.9681			1
	POU4F1				-4.9725			1
	ZNF2				-5.0501			1
	SLC16A8				-5.0533			1
	GPAT2				-5.1042			1
	KAT2A				-5.1127			1
	PCDP1				-5.1163			1
	ANGEL1				-5.1461			1
	CDC42BPG				-5.1524			1
	SF3B1				-5.2214			1
	ACOXL				-5.2389			1
	FOXRED2				-5.2519			1
	MTFP1				-5.2543			1
	ACLY				-5.2775			1
	CCDC101				-5.3037			1
	TAF7L				-5.313			1
	SLC39A6				-5.3417			1
	MICALL1				-5.4169			1
	HIRA				-5.4659			1
	XPNPEP3				-5.4802			1
	SUPT6H				-5.585			1
	INO80B				-5.6533			1
	ASB7				-5.6738			1
	CHAF1B				-5.703			1
	NUS1				-5.7175			1
	UXS1				-5.8188			1
	KLF5				-5.8417			1
	CNOT11				-5.9848			1
	EIF3L				-6.1037			1
	UMPS				-6.1254			1
	ARID5A				-6.2319			1
	POGZ				-6.2615			1
	ARCN1				-6.5299			1
	CIAPIN1				-6.5922			1
	BCL6				-6.7386			1
	TYMP				-6.7484			1
	GYPE			-6.9893				1
	TRIP12				-7.0635			1
	RPS7				-7.3036			1
	BMF				-8.0126			1

## Sheet: Supp Data 2
	Supplementary Data 2. Genes ranked for enrichment: MAGeCK analysis of gefitinib vs control PC-9 cells following transduction with a genome-wide CRISPRn or CRISPRa library.
	Cells were transduced with either a genome-wide loss-of-function CRISPR/Cas9 library (targeting 18,010 human genes) or in parallel a genome-wide gain-of-function (activation) CRISPR/dCas9 SAM library targeting 23,430 coding isoforms with a unique transcription start site.
	After selection, library transduced cells were treated with gefitinib (100nM each) twice a week over 21 days to select for resistance genes using the MAGeCK software package.
	Genes from both screens are ranked for enrichment (resistance) in the tables below.
	A description of the table headers is found at: https://sourceforge.net/p/mageck/wiki/Home/#gene_summary_txt
	CRISPR/Cas9 knockout library - PC-9/gefitinib															CRISPR/dCas9 SAM activation library - PC-9/gefitinib
	Gene	num	neg|score	neg|p-value	neg|fdr	neg|rank	neg|goodsgrna	neg|lfc	pos|score	pos|p-value	pos|fdr	pos|rank	pos|goodsgrna	pos|lfc		Gene	num	neg|score	neg|p-value	neg|fdr	neg|rank	neg|goodsgrna	neg|lfc	pos|score	pos|p-value	pos|fdr	pos|rank	pos|goodsgrna	pos|lfc
	NF2	10	1	1	1	18002	0	5.5357	2.8548e-33	2.7498e-07	0.00015	1	10	5.5357		FGF1	18	0.24043	0.57362	0.999148	7215	3	2.3916	5.3167e-07	6.0038e-06	0.056931	1	14	2.3916
	KCTD5	5	1	1	1	18001	0	7.5085	5.4867e-20	2.7498e-07	0.00015	2	5	7.5085		WWTR1	7	0.22041	0.44816	0.996744	6724	2	4.5644	6.719e-07	3.9155e-06	0.056931	2	5	4.5644
	NF1	5	1	1	1	18000	0	7.6291	8.2594e-19	2.7498e-07	0.00015	3	5	7.6291		NTRK1	6	0.56807	0.72098	0.999665	11764	2	2.9592	4.273e-06	2.6886e-05	0.169967	3	4	2.9592
	CSK	5	1	1	1	18003	0	6.1012	1.7288e-17	2.7498e-07	0.00015	4	5	6.1012		MET	3	0.99992	0.99991	0.999965	18962	0	6.7176	1.3043e-05	4.5159e-05	0.214109	4	3	6.7176
	CIC	5	1	1	1	17999	0	5.2559	4.4106e-16	2.7498e-07	0.00015	5	5	5.2559		ATP5O	3	0.93276	0.9329	0.999665	17681	0	7.5942	1.829e-05	5.8732e-05	0.218647	5	3	7.5942
	AJUBA	10	1	1	1	17998	0	2.3747	3.1081e-14	2.7498e-07	0.00015	6	10	2.3747		PCDH19	3	0.21981	0.33827	0.991358	6710	2	-0.6098	2.1364e-05	6.9174e-05	0.218647	6	1	-0.6098
	RASA1	5	1	1	1	17997	0	4.0687	1.5709e-13	2.7498e-07	0.00015	7	5	4.0687		EXO1	6	0.99997	0.99997	0.999965	18965	0	2.1668	3.0297e-05	0.0001715	0.361386	7	6	2.1668
	PAWR	5	1	1	1	17996	0	2.9283	5.3581e-13	2.7498e-07	0.00015	8	5	2.9283		FOSL1	3	0.47614	0.53733	0.997083	10624	1	6.2926	3.8403e-05	0.00012242	0.331683	8	2	6.2926
	ETV3	9	1	1	1	17994	0	2.6695	8.0302e-13	2.7498e-07	0.00015	9	9	2.6695		TXK	3	0.99995	0.99995	0.999965	18964	0	4.0173	5.2832e-05	0.0001621	0.361386	9	3	4.0173
	PDCD10	5	1	1	1	17995	0	3.1924	2.4783e-12	2.7498e-07	0.00015	10	5	3.1924		PBRM1	3	0.99458	0.99468	0.999665	18864	0	6.018	6.4281e-05	0.00020387	0.386551	10	3	6.018
	MED12	5	1	1	1	17993	0	3.2926	6.3566e-12	2.7498e-07	0.00015	11	5	3.2926		KRAS	3	0.93623	0.93638	0.999665	17743	0	6.6791	7.9259e-05	0.00024407	0.386551	11	3	6.6791
	PPM1F	5	1	1	1	17992	0	3.0274	8.8446e-12	2.7498e-07	0.00015	12	5	3.0274		FOSB	3	0.99992	0.99992	0.999965	18963	0	6.2213	7.9623e-05	0.00024459	0.386551	12	3	6.2213
	MED15	5	1	1	1	17991	0	3.0808	1.0035e-11	2.7498e-07	0.00015	13	5	3.0808		GPR126	3	0.99991	0.99991	0.999965	18961	0	4.3242	8.9495e-05	0.00027017	0.394136	13	3	4.3242
	PTEN	4	1	1	1	17990	0	4.4976	2.3837e-11	2.7498e-07	0.00015	14	4	4.4976		MRPS24	3	0.99988	0.99988	0.999965	18960	0	3.2629	0.00011543	0.00035474	0.480552	14	3	3.2629
	KIAA0907	5	1	1	1	17981	0	3.4773	1.1657e-10	2.7498e-07	0.00015	15	5	3.4773		CSF1R	6	0.47944	0.66195	0.999665	10675	1	2.0814	0.00012818	0.00069826	0.661245	15	5	2.0814
	MED24	5	1	1	1	17989	0	2.4066	7.5526e-10	2.7498e-07	0.00015	16	5	2.4066		PDGFRB	3	0.56885	0.59859	0.999665	11774	1	2.2824	0.00014954	0.00045916	0.580528	16	2	2.2824
	MYL6	4	1	1	1	17988	0	2.7988	1.4577e-09	2.7498e-07	0.00015	17	4	2.7988		ATF3	9	0.67627	0.84876	0.999665	13272	1	2.4411	0.00016077	0.0011927	0.694419	17	8	2.4411
	SETDB1	5	1	1	1	17973	0	3.8377	1.5505e-09	2.7498e-07	0.00015	18	5	3.8377		GHR	27	0.12655	0.43113	0.99446	4495	8	0.48673	0.00016368	0.0020896	0.825598	18	16	0.48673
	CASP9	8	0.99621	0.99617	1	17753	0	1.6865	2.1525e-09	2.7498e-07	0.00015	19	7	1.6865		WNT16	6	0.96606	0.96625	0.999665	18306	0	3.2566	0.00019341	0.0010517	0.694419	19	5	3.2566
	SGK223	5	1	1	1	17987	0	2.0685	5.1542e-09	2.7498e-07	0.00015	20	5	2.0685		RASGRF2	3	0.9998	0.9998	0.999965	18959	0	3.0285	0.00019602	0.00058654	0.622937	20	3	3.0285
	TAOK2	5	1	1	1	17986	0	2.3505	5.1938e-09	2.7498e-07	0.00015	21	5	2.3505		NDRG1	3	0.9998	0.9998	0.999965	18958	0	3.9333	0.00019645	0.00058654	0.622937	21	3	3.9333
	BCL2L11	17	0.9429	0.98522	1	16451	1	1.4666	6.1177e-09	2.7498e-07	0.00015	22	14	1.4666		SF3B6	3	0.9998	0.9998	0.999965	18957	0	3.3133	0.0001995	0.00059124	0.622937	22	3	3.3133
	PLCG1	5	1	1	1	17985	0	2.9494	8.0975e-09	2.7498e-07	0.00015	23	5	2.9494		SRC	6	0.89501	0.90233	0.999665	16977	1	2.6511	0.00020135	0.0010935	0.694419	23	5	2.6511
	TAF5L	5	1	1	1	17975	0	2.285	8.2493e-09	2.7498e-07	0.00015	24	5	2.285		ABCG2	6	0.87553	0.89022	0.999665	16611	1	2.8703	0.00022018	0.0011817	0.694419	24	4	2.8703
	CARM1	5	0.94672	0.9469	1	16514	0	3.4323	9.7337e-09	2.7498e-07	0.00015	25	4	3.4323		RASGRP3	9	0.62993	0.81855	0.999665	12597	2	2.6204	0.00022331	0.00165	0.751414	25	7	2.6204
	RIPK4	5	1	1	1	17984	0	2.1578	1.0472e-08	2.7498e-07	0.00015	26	5	2.1578		ANAPC16	3	0.99504	0.99516	0.999665	18871	0	2.8848	0.00023499	0.00070087	0.661245	26	3	2.8848
	LZTR1	5	1	1	1	17974	0	2.3945	1.6252e-08	2.7498e-07	0.00015	27	5	2.3945		GNAQ	3	0.99975	0.99974	0.999965	18956	0	3.2883	0.00024537	0.0007322	0.661245	27	3	3.2883
	SBNO2	5	1	1	1	17983	0	1.7497	2.0853e-08	2.7498e-07	0.00015	28	5	1.7497		CYP7A1	3	0.36002	0.4699	0.997083	9265	1	4.68	0.00027267	0.00081416	0.685966	28	2	4.68
	BAX	5	1	1	1	17982	0	2.0999	2.9879e-08	2.7498e-07	0.00015	29	5	2.0999		FOXP1	21	0.22826	0.57545	0.999407	6914	8	0.56777	0.00027734	0.0031708	0.93883	29	12	0.56777
	TSC2	4	1	1	1	17980	0	2.3153	5.0103e-08	2.7498e-07	0.00015	30	4	2.3153		NDUFAF6	3	0.45506	0.52437	0.997083	10393	1	2.2084	0.00027771	0.00083191	0.685966	30	2	2.2084
	CRB3	5	1	1	1	17979	0	1.5062	5.5186e-08	2.7498e-07	0.00015	31	5	1.5062		RGPD5	8	0.99754	0.99752	0.99968	18923	0	2.2704	0.00030107	0.0020128	0.812197	31	8	2.2704
	PGP	5	1	1	1	17978	0	2.2729	7.7741e-08	2.7498e-07	0.00015	32	5	2.2729		CD6	3	0.99969	0.99968	0.999965	18955	0	3.0368	0.00030937	0.00091231	0.694419	32	3	3.0368
	MYO18B	5	1	1	1	17977	0	1.5172	9.9034e-08	2.7498e-07	0.00015	33	5	1.5172		CYP4F12	3	0.45654	0.52528	0.997083	10412	1	2.0592	0.00032043	0.00095512	0.694419	33	2	2.0592
	SUPT20H	5	1	1	1	17976	0	2.3042	1.4368e-07	8.2495e-07	0.000362	34	5	2.3042		ENO4	3	0.99965	0.99964	0.999965	18954	0	2.8742	0.00035289	0.0010585	0.694419	34	3	2.8742
	WWC1	5	1	0.99999	1	17953	0	2.0722	1.4547e-07	8.2495e-07	0.000362	35	5	2.0722		DPEP2	3	0.49099	0.54663	0.997083	10808	1	0.47115	0.00036315	0.0010841	0.694419	35	2	0.47115
	DET1	5	1	1	1	17971	0	2.4326	1.5e-07	8.2495e-07	0.000362	36	5	2.4326		ME3	9	0.23295	0.48675	0.997083	7037	3	1.7925	0.00036847	0.0026999	0.902783	36	6	1.7925
	GATA6	5	0.99999	0.99999	1	17949	0	2.5895	1.5674e-07	8.2495e-07	0.000362	37	5	2.5895		S100A12	3	0.98625	0.98641	0.999665	18693	0	5.2055	0.00040062	0.0011827	0.694419	37	3	5.2055
	CBLB	5	0.99997	0.99997	1	17941	0	2.7198	1.6755e-07	8.2495e-07	0.000362	38	5	2.7198		FRAT1	3	0.99959	0.99959	0.999965	18953	0	3.3761	0.00040944	0.0012083	0.694419	38	3	3.3761
	YPEL3	8	1	1	1	17958	0	1.7172	1.7387e-07	2.4748e-06	0.000928	39	8	1.7172		RPL34	4	0.17598	0.32158	0.991358	5687	1	4.0021	0.00042677	0.001556	0.751414	39	3	4.0021
	TADA2B	5	1	1	1	17968	0	2.7364	2.1208e-07	8.2495e-07	0.000362	40	5	2.7364		FGF13	12	0.51006	0.77875	0.999665	11044	3	0.6027	0.00042721	0.0037028	0.93883	40	7	0.6027
	HIVEP1	5	0.99898	0.99899	1	17868	0	2.9563	2.2523e-07	8.2495e-07	0.000362	41	5	2.9563		GOLGA8N	3	0.34779	0.4632	0.996866	9132	1	4.3295	0.00042852	0.0012741	0.710687	41	2	4.3295
	DAPK3	5	0.97196	0.97209	1	17058	0	2.5204	2.4171e-07	8.2495e-07	0.000362	42	4	2.5204		NTNG2	3	0.018409	0.047675	0.962523	1007	1	4.1653	0.00044859	0.0013341	0.722914	42	2	4.1653
	ROCK2	5	0.9999	0.99991	1	17928	0	2.8082	4.9216e-07	1.9249e-06	0.000753	43	5	2.8082		ERBB2	6	0.23942	0.43881	0.995347	7185	1	1.6827	0.00045718	0.0024221	0.863311	43	5	1.6827
	MBD2	5	1	1	1	17972	0	2.5724	4.963e-07	1.9249e-06	0.000753	44	5	2.5724		FABP12	3	0.54053	0.57908	0.999665	11412	1	0.50117	0.0004913	0.0014511	0.751414	44	2	0.50117
	SPRED2	4	1	1	1	17970	0	2.3279	5.0656e-07	1.3749e-06	0.000589	45	4	2.3279		PLXNB3	3	0.99948	0.99948	0.999965	18952	0	3.7224	0.00051631	0.0015111	0.751414	45	3	3.7224
	THAP11	5	1	1	1	17969	0	2.1103	5.5096e-07	1.9249e-06	0.000753	46	5	2.1103		C16orf78	3	0.96436	0.96456	0.999665	18264	0	4.8416	0.0005234	0.001532	0.751414	46	3	4.8416
	ADRBK1	5	0.99965	0.99966	1	17903	0	2.1549	6.0156e-07	1.9249e-06	0.000753	47	5	2.1549		SF3A3	3	0.092632	0.17581	0.983159	3591	1	5.2574	0.0005483	0.001602	0.751414	47	2	5.2574
	TAF6L	5	1	1	1	17967	0	2.425	6.689e-07	2.4748e-06	0.000928	48	5	2.425		DAPP1	3	0.99943	0.99944	0.999965	18951	0	2.8657	0.00056975	0.0016641	0.751414	48	3	2.8657
	TADA1	5	0.99299	0.99304	1	17641	0	2.3311	8.543e-07	3.5748e-06	0.001287	49	5	2.3311		ITGB4	6	0.38803	0.60444	0.999665	9617	1	2.5865	0.00059268	0.0031243	0.93883	49	5	2.5865
	PTPN12	4	0.99989	0.9999	1	17925	0	3.0749	9.0891e-07	3.0248e-06	0.001111	50	4	3.0749		TEX264	6	0.23687	0.43584	0.995281	7118	2	2.3839	0.00060287	0.0031802	0.93883	50	4	2.3839
	EWSR1	5	0.99938	0.99936	1	17885	0	2.2266	1.0187e-06	4.1247e-06	0.001401	51	5	2.2266		TSEN2	6	0.99622	0.99621	0.999665	18897	0	2.8168	0.00061654	0.0032533	0.93883	51	6	2.8168
	CNOT4	5	0.99997	0.99997	1	17938	0	2.5854	1.0348e-06	4.1247e-06	0.001401	52	5	2.5854		FBXO41	3	0.79602	0.79606	0.999665	15274	0	3.145	0.00061944	0.0018103	0.798411	52	2	3.145
	C1orf172	5	0.99871	0.99872	1	17855	0	2.0909	1.1298e-06	4.1247e-06	0.001401	53	5	2.0909		DTX4	3	0.049226	0.11783	0.974719	2381	1	4.8681	0.00064119	0.0018693	0.805693	53	2	4.8681
	ZIC2	5	1	1	1	17966	0	1.5223	1.2567e-06	4.6747e-06	0.001558	54	5	1.5223		ERMN	6	0.52102	0.68909	0.999665	11197	2	0.54298	0.00065057	0.0034125	0.93883	54	3	0.54298
	KEAP1	5	1	1	1	17965	0	2.2282	1.5492e-06	6.3246e-06	0.001998	55	5	2.2282		RHOG	3	0.99788	0.99793	0.999778	18929	0	2.9015	0.00066215	0.0019298	0.812197	55	3	2.9015
	NHLRC2	5	0.99998	0.99998	1	17945	0	2.8987	1.6439e-06	6.3246e-06	0.001998	56	5	2.8987		NT5C1A	3	0.99932	0.99933	0.999965	18950	0	3.3753	0.00068148	0.0019792	0.812197	56	3	3.3753
	MAGI1	5	1	1	1	17964	0	1.5392	1.6464e-06	6.3246e-06	0.001998	57	5	1.5392		EEF1D	5	0.060813	0.16613	0.983159	2712	2	1.6539	0.00068623	0.0031013	0.93883	57	3	1.6539
	DNTTIP1	5	1	1	1	17959	0	1.889	1.7685e-06	6.8745e-06	0.002134	58	5	1.889		KDM5A	3	0.29252	0.42723	0.994188	8410	2	-0.31479	0.00079028	0.0022827	0.863311	58	1	-0.31479
	RARG	5	1	1	1	17963	0	1.7385	2.1062e-06	7.4245e-06	0.002265	59	5	1.7385		LRRFIP1	6	0.070516	0.18927	0.983159	2969	1	1.3607	0.00081158	0.0042013	0.93883	59	5	1.3607
	PTBP1	5	1	1	1	17962	0	1.937	2.3355e-06	8.5244e-06	0.002558	60	5	1.937		RASGRP1	3	0.98	0.9801	0.999665	18581	0	3.2275	0.00083298	0.0023887	0.863311	60	3	3.2275
	DPH2	5	1	1	1	17961	0	1.974	2.3673e-06	9.0744e-06	0.002678	61	5	1.974		PRKCD	3	0.82876	0.82869	0.999665	15828	0	4.6105	0.00084995	0.0024399	0.863311	61	2	4.6105
	TMEM222	5	1	1	1	17960	0	1.2755	2.5502e-06	1.1274e-05	0.003274	62	5	1.2755		PMCH	3	0.99915	0.99916	0.999965	18949	0	2.6731	0.00085412	0.0024514	0.863311	62	3	2.6731
	C16orf72	5	0.51511	0.65962	1	11155	1	1.4943	3.0842e-06	1.4024e-05	0.003825	63	4	1.4943		B4GALNT2	9	0.28971	0.54884	0.997083	8341	1	1.7201	0.00085546	0.0059701	0.93883	63	8	1.7201
	LIMK2	5	0.99982	0.99983	1	17918	0	2.4425	3.0989e-06	1.4024e-05	0.003825	64	5	2.4425		SEC61B	3	0.99914	0.99915	0.999965	18948	0	2.5302	0.0008572	0.0024581	0.863311	64	3	2.5302
	SPRED1	5	0.99999	0.99999	1	17952	0	2.1051	3.1933e-06	1.4024e-05	0.003825	65	5	2.1051		RASGRP4	3	0.68101	0.68561	0.999665	13345	1	1.2689	0.00091839	0.0026346	0.902783	65	2	1.2689
	SIRT6	5	1	1	1	17957	0	1.3618	3.2403e-06	1.4024e-05	0.003825	66	5	1.3618		PODNL1	6	0.41002	0.61806	0.999665	9875	2	1.4297	0.00094242	0.0048544	0.93883	66	4	1.4297
	SMARCB1	5	1	0.99999	1	17956	0	2.0826	3.382e-06	1.4574e-05	0.003916	67	5	2.0826		UBE2D3	15	0.61405	0.86204	0.999665	12364	4	0.81051	0.00096097	0.0084431	0.953118	67	9	0.81051
	RNF214	5	1	0.99999	1	17955	0	1.7187	3.5629e-06	1.5124e-05	0.004004	68	5	1.7187		SLC9B1	3	0.24307	0.36696	0.992996	7279	2	-0.37151	0.00096109	0.0027547	0.902783	68	1	-0.37151
	CDKN2B	6	0.99812	0.99808	1	17820	0	1.5837	3.5666e-06	2.3923e-05	0.005982	69	6	1.5837		CHURC1-FNTB	3	0.99904	0.99906	0.999965	18947	0	2.8749	0.00096349	0.0027609	0.902783	69	3	2.8749
	CDC42BPB	5	1	0.99999	1	17954	0	1.7525	4.2282e-06	1.8424e-05	0.004738	70	5	1.7525		KDR	3	0.95957	0.95983	0.999665	18172	0	3.2931	0.0010038	0.0028669	0.921547	70	3	3.2931
	RFWD2	5	0.99353	0.99356	1	17670	0	2.0079	4.488e-06	1.8424e-05	0.004738	71	5	2.0079		GCFC2	6	0.99473	0.99472	0.999665	18868	0	2.2649	0.0010176	0.0052314	0.93883	71	6	2.2649
	VGLL4	5	0.99993	0.99994	1	17934	0	1.3576	5.3906e-06	2.3923e-05	0.005982	72	5	1.3576		FRMD1	6	0.40756	0.6165	0.999665	9849	2	3.048	0.0010241	0.0052611	0.93883	72	4	3.048
	STK40	5	0.99998	0.99998	1	17946	0	1.9605	6.2964e-06	2.7773e-05	0.006849	73	5	1.9605		GNB2	3	0.99895	0.99897	0.999965	18946	0	3.8921	0.0010506	0.0030183	0.93883	73	3	3.8921
	TSC22D3	13	0.96915	0.98679	1	17003	1	1.3311	6.7798e-06	6.2421e-05	0.013874	74	11	1.3311		PDC	6	0.081	0.21055	0.988233	3256	3	0.2004	0.0010677	0.0054668	0.93883	74	3	0.2004
	NR2C2	5	0.99991	0.99992	1	17931	0	1.8155	9.2268e-06	4.1522e-05	0.010102	75	5	1.8155		SLC43A1	6	0.92447	0.92513	0.999665	17512	1	3.1905	0.0011283	0.0057607	0.93883	75	5	3.1905
	ARHGAP17	5	0.99999	0.99999	1	17951	0	1.2902	9.5284e-06	4.2622e-05	0.010227	76	5	1.2902		ADD2	6	0.79052	0.85061	0.999665	15181	1	1.0632	0.0011531	0.0058793	0.93883	76	5	1.0632
	HTR3A	5	0.90433	0.9047	1	15680	0	1.5223	9.6669e-06	4.3172e-05	0.010227	77	4	1.5223		PQLC2L	3	0.99883	0.99886	0.99991	18945	0	3.8293	0.0011701	0.0033436	0.93883	77	3	3.8293
	TKT	5	0.99873	0.99873	1	17857	0	2.491	1.1494e-05	5.0322e-05	0.011765	78	5	2.491		RABGEF1	9	0.3502	0.61239	0.999665	9162	2	1.6067	0.0011832	0.0080631	0.943925	78	7	1.6067
	MSGN1	5	0.99999	0.99999	1	17950	0	1.2293	1.2885e-05	5.4446e-05	0.012567	79	5	1.2293		PHB	4	0.29694	0.44278	0.995347	8509	1	2.9756	0.0011923	0.004311	0.93883	79	3	2.9756
	HS6ST2	5	0.99304	0.99309	1	17647	0	1.5573	1.3587e-05	5.6921e-05	0.012972	80	5	1.5573		CDK5RAP3	6	0.99879	0.99877	0.999873	18944	0	1.4377	0.001213	0.0061648	0.93883	80	6	1.4377
	SETD1B	5	0.99998	0.99997	1	17943	0	1.8243	1.4742e-05	6.2421e-05	0.013874	81	5	1.8243		MAGEB2	3	0.98192	0.98209	0.999665	18618	0	1.4343	0.0012173	0.0034678	0.93883	81	3	1.4343
	JUND	5	0.99998	0.99998	1	17948	0	1.8812	1.5387e-05	6.4621e-05	0.014187	82	5	1.8812		SRF	3	0.99871	0.99874	0.999873	18943	0	2.1721	0.0012898	0.0036673	0.93883	82	3	2.1721
	NFIB	9	0.90428	0.94228	1	15679	1	1.3103	1.581e-05	0.00013089	0.025949	83	8	1.3103		RNF112	3	0.14158	0.23941	0.988921	4873	1	4.6808	0.0013011	0.0036954	0.93883	83	2	4.6808
	PDS5B	5	0.99998	0.99998	1	17947	0	1.606	1.7085e-05	7.562e-05	0.016207	84	5	1.606		TEAD3	3	0.99357	0.9937	0.999665	18840	0	4.1067	0.0013046	0.0037028	0.93883	84	3	4.1067
	CUL3	4	0.98471	0.98476	1	17394	0	2.7158	1.8373e-05	6.6821e-05	0.014494	85	4	2.7158		CSMD3	6	0.99868	0.99865	0.999863	18942	0	2.0954	0.0013219	0.0066587	0.93883	85	6	2.0954
	HCCS	5	0.99998	0.99998	1	17944	0	2.303	2.2165e-05	9.7618e-05	0.020676	86	5	2.303		DPCD	3	0.42944	0.50919	0.997083	10089	1	3.0013	0.0013454	0.0038187	0.93883	86	2	3.0013
	PARD3	5	0.9998	0.99981	1	17915	0	2.2137	2.6165e-05	0.00012457	0.025596	87	5	2.2137		CYP21A2	5	0.99864	0.99862	0.999863	18941	0	2.2042	0.0013622	0.0060698	0.93883	87	5	2.2042
	TCEB2	5	0.99997	0.99997	1	17942	0	2.2211	2.6459e-05	0.00012512	0.025596	88	5	2.2211		C3orf36	3	0.98048	0.98059	0.999665	18591	0	4.8467	0.0013795	0.0039043	0.93883	88	3	4.8467
	ZNF236	5	0.98432	0.98442	1	17388	0	1.9701	2.7467e-05	0.00012842	0.025949	89	5	1.9701		PDZD8	3	0.99861	0.99865	0.999863	18940	0	2.0053	0.0013916	0.0039351	0.93883	89	3	2.0053
	GDPD5	5	0.03232	0.096277	0.86368	1957	3	-0.51679	2.8112e-05	0.00013117	0.025949	90	2	-0.51679		CSNK1E	6	0.9986	0.99856	0.999863	18939	0	1.4991	0.0014041	0.0070602	0.93883	90	6	1.4991
	LATS1	4	0.99997	0.99997	1	17940	0	1.5977	3.009e-05	0.00010807	0.022623	91	4	1.5977		FITM1	3	0.44595	0.51886	0.997083	10284	1	4.5037	0.0014103	0.0039826	0.93883	91	2	4.5037
	F8A3	5	0.99997	0.99997	1	17939	0	1.121	3.059e-05	0.00014437	0.02825	92	5	1.121		ZNF226	6	0.99858	0.99854	0.999863	18938	0	1.9436	0.0014247	0.0071672	0.93883	92	6	1.9436
	ZSWIM6	5	0.99988	0.99988	1	17923	0	1.2448	3.2932e-05	0.00015811	0.030282	93	5	1.2448		LOC100130357	3	0.9444	0.94458	0.999665	17891	0	4.0503	0.0014307	0.0040379	0.93883	93	3	4.0503
	NFAT5	5	0.97931	0.97946	1	17246	0	1.9346	3.7818e-05	0.00018341	0.034499	94	5	1.9346		GRINA	3	0.6847	0.68877	0.999665	13398	1	4.5387	0.0014415	0.0040645	0.93883	94	2	4.5387
	USP15	5	0.87659	0.87706	1	15171	1	1.8525	3.806e-05	0.00018396	0.034499	95	4	1.8525		TEX36	3	0.51601	0.56278	0.997083	11125	1	4.3276	0.0014619	0.0041277	0.93883	95	2	4.3276
	MED19	5	0.99727	0.99727	1	17784	0	2.0675	3.9006e-05	0.00018891	0.035062	96	5	2.0675		INSL6	3	0.99854	0.99856	0.999863	18937	0	2.7858	0.0014631	0.0041319	0.93883	96	3	2.7858
	CRYBB3	5	0.96838	0.96857	1	16983	0	1.3285	4.2045e-05	0.00020266	0.03723	97	4	1.3285		GTPBP3	6	0.48759	0.66718	0.999665	10771	2	2.0591	0.0014855	0.0074632	0.93883	97	4	2.0591
	CGREF1	14	0.9996	0.99961	1	17896	0	1.1256	4.4206e-05	0.00048589	0.071279	98	12	1.1256		C14orf180	6	0.22073	0.41706	0.994188	6729	3	0.26564	0.0014946	0.0075149	0.93883	98	3	0.26564
	MPP5	5	0.99422	0.99425	1	17689	0	2.4123	4.4366e-05	0.00021146	0.038454	99	5	2.4123		TMEM9	6	0.99849	0.99846	0.999863	18936	0	1.6729	0.0015133	0.0076047	0.93883	99	6	1.6729
	MGA	5	0.99995	0.99996	1	17937	0	1.4566	4.5705e-05	0.00021861	0.038876	100	5	1.4566		PNRC1	3	0.9884	0.98856	0.999665	18733	0	3.9622	0.0015144	0.0042854	0.93883	100	3	3.9622
	AMOTL2	5	0.99995	0.99996	1	17936	0	1.1888	4.5895e-05	0.00021971	0.038876	101	5	1.1888		RAPGEF1	6	0.30136	0.51029	0.997083	8604	1	1.842	0.0015254	0.0076689	0.93883	101	3	1.842
	ITPRIPL2	5	0.989	0.98909	1	17511	0	1.7937	4.6089e-05	0.00022026	0.038876	102	5	1.7937		TREML1	3	0.054093	0.12449	0.974719	2515	1	1.1776	0.0015588	0.0044175	0.93883	102	2	1.1776
	KCTD9	3	0.92672	0.92686	1	16123	0	3.647	4.6215e-05	0.00014877	0.028798	103	3	3.647		WEE1	6	0.99843	0.9984	0.999863	18935	0	2.1524	0.0015714	0.0078934	0.93883	103	6	2.1524
	PIAS1	5	0.99158	0.99165	1	17594	0	1.6962	4.7284e-05	0.00022576	0.03946	104	5	1.6962		ALOX15B	3	0.98963	0.98976	0.999665	18769	0	5.3426	0.0015794	0.0044812	0.93883	104	3	5.3426
	FRYL	5	0.99995	0.99996	1	17935	0	1.2531	5.0873e-05	0.00024171	0.041841	105	5	1.2531		WIPI2	6	0.9873	0.98732	0.999665	18714	0	3.362	0.0016395	0.008215	0.946946	105	6	3.362
	FBXL20	5	0.99981	0.99982	1	17916	0	1.8109	5.275e-05	0.00024721	0.042386	106	5	1.8109		PTPRK	4	0.99832	0.99835	0.999863	18934	0	2.2816	0.0016763	0.0060521	0.93883	106	4	2.2816
	SHB	5	0.54127	0.68342	1	11518	1	1.6016	6.7631e-05	0.00031155	0.05242	107	4	1.6016		UROC1	3	0.88619	0.88625	0.999665	16806	0	4.1284	0.0017254	0.0048941	0.93883	107	3	4.1284
	PHF10	4	0.58389	0.64754	1	11967	1	2.4634	6.9944e-05	0.00026096	0.044321	108	3	2.4634		CYP11A1	5	0.51988	0.667	0.999665	11182	1	2.795	0.0017314	0.0075979	0.93883	108	4	2.795
	MAU2	5	0.99993	0.99994	1	17933	0	2.046	7.0601e-05	0.0003242	0.05315	109	5	2.046		WDR26	3	0.99821	0.99825	0.999863	18933	0	3.6894	0.0017854	0.0050633	0.93883	109	3	3.6894
	CDC42	5	0.99921	0.99922	1	17877	0	2.3118	7.0693e-05	0.00032475	0.05315	110	5	2.3118		PEX13	3	0.89991	0.90001	0.999665	17078	0	0.73843	0.0018149	0.0051437	0.93883	110	3	0.73843
	ZNF281	5	0.81399	0.82482	1	14164	1	1.5989	7.479e-05	0.0003418	0.055437	111	4	1.5989		C1orf56	3	0.83526	0.83521	0.999665	15928	0	4.0161	0.0018576	0.0052601	0.93883	111	2	4.0161
	ERF	5	0.98313	0.98324	1	17346	0	1.307	7.6223e-05	0.00034675	0.055737	112	5	1.307		NAA30	3	0.91121	0.91128	0.999665	17270	0	4.303	0.0018799	0.0053206	0.93883	112	3	4.303
	PLEKHH3	5	0.9999	0.99991	1	17926	0	1.5735	7.7347e-05	0.00035335	0.056295	113	5	1.5735		TMEM217	6	0.97837	0.9783	0.999665	18541	0	1.5961	0.0018814	0.009387	0.968017	113	5	1.5961
	BRD2	5	0.6658	0.74209	1	12597	1	1.8277	8.5226e-05	0.0003913	0.061794	114	4	1.8277		MED30	3	0.99538	0.99549	0.999665	18880	0	5.6722	0.0019002	0.0053755	0.93883	114	3	5.6722
	RNF146	4	0.98634	0.9864	1	17431	0	1.9168	8.5909e-05	0.00031815	0.053034	115	4	1.9168		KALRN	6	0.25037	0.45176	0.996744	7451	2	2.2151	0.0019055	0.0095034	0.968017	115	4	2.2151
	CAND1	5	0.99991	0.99992	1	17932	0	1.3646	8.6626e-05	0.0003968	0.062118	116	5	1.3646		SLC25A13	3	0.40675	0.49594	0.997083	9839	1	4.2835	0.0019115	0.0054068	0.93883	116	2	4.2835
	VSNL1	5	0.81011	0.822	1	14112	1	1.1718	9.0842e-05	0.00041605	0.06457	117	4	1.1718		ZNF526	3	0.99041	0.99053	0.999665	18785	0	3.578	0.0019429	0.0055023	0.93883	117	3	3.578
	C11orf73	5	0.99991	0.99991	1	17930	0	2.0466	9.4081e-05	0.00043255	0.066412	118	5	2.0466		KBTBD4	5	0.25349	0.44933	0.996744	7519	2	0.64058	0.0019569	0.0085575	0.956897	118	3	0.64058
	HIST1H3C	5	0.99991	0.99991	1	17929	0	1.0247	9.4521e-05	0.0004353	0.066412	119	5	1.0247		HIST1H2BJ	3	0.99804	0.99809	0.999828	18932	0	2.2778	0.00196	0.005554	0.93883	119	3	2.2778
	LAT	5	0.9999	0.99991	1	17927	0	1.0417	0.00010096	0.00046609	0.070173	120	5	1.0417		DBH	3	0.75189	0.75209	0.999665	14531	0	0.37936	0.0019856	0.0056099	0.93883	120	2	0.37936
	ASAP2	5	0.99987	0.99987	1	17922	0	1.5401	0.00010203	0.00046774	0.070173	121	5	1.5401		COQ10A	6	0.62552	0.76154	0.999665	12520	2	1.8327	0.0019903	0.00993	0.968017	121	4	1.8327
	SOX7	5	0.98772	0.98779	1	17477	0	1.328	0.00010512	0.00048204	0.071279	122	5	1.328		COLEC11	9	0.068514	0.21745	0.988233	2921	3	2.0619	0.0019989	0.013272	0.968017	122	6	2.0619
	DPH1	5	0.97005	0.97019	1	17024	0	1.8821	0.00010648	0.00048699	0.071279	123	4	1.8821		ASB16	3	0.998	0.99805	0.999828	18931	0	2.337	0.0020045	0.0056579	0.93883	123	3	2.337
	MYH9	5	0.99934	0.99934	1	17883	0	2.12	0.00010731	0.00049139	0.071343	124	5	2.12		DEDD2	6	0.98391	0.9839	0.999665	18653	0	1.9859	0.0020147	0.010039	0.968017	124	6	1.9859
	DUSP4	5	0.98475	0.98487	1	17395	0	1.1104	0.00010967	0.00049909	0.071881	125	5	1.1104		CD37	3	0.79489	0.79494	0.999665	15251	0	4.1403	0.0020782	0.0058526	0.93883	125	2	4.1403
	MEMO1	5	0.99347	0.9935	1	17669	0	2.1651	0.00011307	0.00051229	0.073197	126	5	2.1651		SIRT2	4	0.67613	0.71454	0.999665	13269	1	2.9957	0.002082	0.0074893	0.93883	126	3	2.9957
	DUSP7	5	0.99988	0.99989	1	17924	0	0.9212	0.00011811	0.00053704	0.076128	127	5	0.9212		ECM1	3	0.31658	0.44666	0.996627	8790	1	3.6819	0.0020848	0.0058709	0.93883	127	2	3.6819
	SUPT7L	5	0.99961	0.99961	1	17900	0	1.4268	0.00012839	0.00058324	0.082031	128	5	1.4268		PPIAL4B	4	0.99722	0.99724	0.99968	18916	0	2.8758	0.0021131	0.0076073	0.93883	128	4	2.8758
	B3GALT6	5	0.00018725	0.00086537	0.168264	90	4	-0.67177	0.00014055	0.00063768	0.088385	129	1	-0.67177		DYNC2H1	3	0.99788	0.99793	0.999778	18930	0	4.0452	0.0021151	0.0059487	0.93883	129	3	4.0452
	THAP7	5	0.99986	0.99987	1	17921	0	1.0503	0.00014069	0.00063823	0.088385	130	5	1.0503		SSTR2	3	0.95351	0.95382	0.999665	18068	0	4.2182	0.002154	0.0060531	0.93883	130	3	4.2182
	RASSF1	5	0.99985	0.99986	1	17920	0	0.79475	0.00015394	0.00071138	0.097697	131	5	0.79475		CDK9	3	0.99783	0.99787	0.999778	18928	0	3.1309	0.0021748	0.0061168	0.93883	131	3	3.1309
	CREBBP	5	0.9896	0.98969	1	17529	0	1.8714	0.00015475	0.00071633	0.097697	132	5	1.8714		TRIM27	3	0.56275	0.59427	0.999665	11699	1	2.6152	0.0021989	0.0061831	0.93883	132	2	2.6152
	SUV420H1	5	0.99984	0.99985	1	17919	0	1.5975	0.00016046	0.00074383	0.100685	133	5	1.5975		LRRC58	3	0.99015	0.99028	0.999665	18777	0	4.2311	0.0022151	0.0062301	0.93883	133	3	4.2311
	CTDSPL2	5	0.82769	0.8348	1	14366	1	2.0167	0.00016571	0.00076582	0.102127	134	4	2.0167		NTSR2	3	0.89543	0.89551	0.999665	16988	0	4.4736	0.0022357	0.006287	0.93883	134	3	4.4736
	EP300	5	0.99816	0.99814	1	17823	0	1.4728	0.00016779	0.00077737	0.102905	135	5	1.4728		SLC25A42	3	0.96547	0.96563	0.999665	18295	0	2.0146	0.0022416	0.0062985	0.93883	135	3	2.0146
	SEZ6L	5	0.99982	0.99982	1	17917	0	0.9274	0.0001825	0.00084337	0.110826	136	5	0.9274		NDRG4	12	0.7226	0.89727	0.999665	14025	3	0.37316	0.0022434	0.016495	0.968017	136	7	0.37316
	MRPS26	5	0.85016	0.85269	1	14712	1	1.7122	0.00018771	0.00086867	0.113323	137	4	1.7122		RBBP8	6	0.99402	0.99398	0.999665	18850	0	1.6666	0.0022625	0.011209	0.968017	137	6	1.6666
	DUSP1	5	0.99593	0.99594	1	17744	0	1.1418	0.00019016	0.00087857	0.11379	138	5	1.1418		HIST1H2BF	3	0.54814	0.58421	0.999665	11497	1	1.0051	0.0022843	0.0064076	0.93883	138	2	1.0051
	RNF7	7	0.19324	0.40497	1	6334	2	0.95267	0.00019055	0.0011508	0.139577	139	5	0.95267		TPD52L3	3	0.96796	0.96813	0.999665	18347	0	4.0587	0.0022979	0.0064478	0.93883	139	3	4.0587
	GNPDA1	4	0.040198	0.10085	0.868997	2308	2	0.054423	0.00020239	0.00076032	0.102127	140	2	0.054423		SCML1	3	0.87467	0.8748	0.999665	16591	0	3.6863	0.0023119	0.0064922	0.93883	140	3	3.6863
	SHC4	5	0.99979	0.99979	1	17914	0	1.4158	0.0002145	0.00098141	0.126202	141	5	1.4158		MEF2A	6	0.98953	0.98955	0.999665	18765	0	2.0585	0.0023222	0.011486	0.968017	141	6	2.0585
	SAFB	5	0.89566	0.89613	1	15523	0	1.5933	0.00021957	0.0010029	0.128046	142	4	1.5933		RNF121	3	0.11056	0.1993	0.986185	4080	2	-0.96374	0.0023269	0.0065386	0.93883	142	1	-0.96374
	SIAH1	5	0.99978	0.99978	1	17913	0	1.5457	0.00022245	0.0010155	0.128748	143	5	1.5457		NES	3	0.92553	0.92561	0.999665	17532	0	3.4496	0.0023305	0.0065485	0.93883	143	3	3.4496
	UNC45A	5	0.98588	0.986	1	17425	0	1.6962	0.00023262	0.0010612	0.132666	144	5	1.6962		RNF187	3	0.99764	0.99768	0.99968	18927	0	2.3201	0.0023606	0.0066378	0.93883	144	3	2.3201
	SHROOM3	5	0.65596	0.73778	1	12507	1	1.3538	0.00024194	0.0011008	0.135732	145	4	1.3538		HAS2	3	0.44187	0.51647	0.997083	10233	1	1.6349	0.0023696	0.006654	0.93883	145	2	1.6349
	TGFBR2	5	0.93113	0.93138	1	16208	0	1.2124	0.00025025	0.0011431	0.139577	146	3	1.2124		PPP2R1B	3	0.99761	0.99764	0.99968	18926	0	2.6569	0.0023949	0.0067161	0.93883	146	3	2.6569
	FLYWCH1	5	0.99975	0.99975	1	17912	0	1.1048	0.00025329	0.0011552	0.139577	147	5	1.1048		ZNF684	3	0.28999	0.42421	0.994188	8348	1	2.2476	0.0024122	0.0067615	0.93883	147	2	2.2476
	MMP26	5	0.99974	0.99974	1	17911	0	1.038	0.00026237	0.0012008	0.144125	148	5	1.038		PUS7	3	0.94353	0.94371	0.999665	17875	0	3.6747	0.0024154	0.0067678	0.93883	148	3	3.6747
	ZNF280A	5	0.99887	0.99887	1	17862	0	1.1598	0.00028546	0.0013147	0.156744	149	5	1.1598		PHOSPHO2	3	0.99758	0.9976	0.99968	18925	0	2.5223	0.0024241	0.0067897	0.93883	149	3	2.5223
	KRT18	4	0.99971	0.99972	1	17910	0	1.2428	0.00028855	0.0010579	0.132666	150	4	1.2428		PRRG2	3	0.99755	0.99757	0.99968	18924	0	2.4289	0.0024527	0.0068662	0.93883	150	3	2.4289
	MEIS2	5	0.98759	0.98767	1	17470	0	1.4966	0.0002922	0.001346	0.158448	151	5	1.4966		MAPK12	3	0.9756	0.97578	0.999665	18487	0	2.4682	0.0024549	0.0068727	0.93883	151	3	2.4682
	DPH7	4	0.99971	0.99972	1	17909	0	1.3652	0.00029295	0.0010738	0.133322	152	4	1.3652		PDE1B	9	0.99534	0.9954	0.999665	18879	0	1.5753	0.002455	0.015972	0.968017	152	8	1.5753
	ARHGEF10L	5	0.94126	0.94145	1	16411	0	1.4231	0.00029336	0.0013499	0.158448	153	4	1.4231		LHFPL3	3	0.5917	0.61505	0.999665	12049	1	4.6418	0.0024824	0.0069558	0.93883	153	2	4.6418
	APAF1	5	0.99971	0.9997	1	17908	0	1.2858	0.00029462	0.0013554	0.158448	154	5	1.2858		MFSD12	3	0.90257	0.90263	0.999665	17118	0	2.2957	0.0024976	0.0069928	0.93883	154	3	2.2957
	SIK3	5	0.9997	0.9997	1	17907	0	0.8851	0.00030245	0.0013955	0.162089	155	5	0.8851		AGTR1	6	0.95726	0.95743	0.999665	18141	0	1.9123	0.0025055	0.012382	0.968017	155	5	1.9123
	TSC1	5	0.99969	0.99969	1	17906	0	1.3833	0.00031088	0.0014329	0.165366	156	5	1.3833		KIAA0586	9	0.35335	0.61561	0.999665	9191	3	0.83611	0.0025057	0.016231	0.968017	156	5	0.83611
	FOSL2	5	0.30944	0.48063	1	8260	1	1.426	0.00031482	0.0014472	0.165952	157	4	1.426		AFF4	3	0.55562	0.58936	0.999665	11597	1	0.33555	0.0025402	0.0071061	0.93883	157	2	0.33555
	RBM15	5	0.99968	0.99968	1	17905	0	1.5669	0.00032402	0.0014819	0.167605	158	5	1.5669		SMARCB1	3	0.99745	0.99747	0.99968	18922	0	2.2071	0.0025495	0.0071286	0.93883	158	3	2.2071
	HMGXB4	5	0.99968	0.99968	1	17904	0	1.1229	0.00032411	0.001483	0.167605	159	5	1.1229		NUDT17	3	0.80781	0.80772	0.999665	15485	0	3.4987	0.0025528	0.0071395	0.93883	159	2	3.4987
	FHL2	5	0.95045	0.95063	1	16586	0	1.097	0.00032567	0.0014896	0.167605	160	4	1.097		HOXA2	3	0.99743	0.99746	0.99968	18921	0	2.0282	0.0025655	0.0071714	0.93883	160	3	2.0282
	LEAP2	5	0.86278	0.86378	1	14919	1	1.4243	0.00033459	0.0015264	0.170684	161	4	1.4243		CCDC63	3	0.99743	0.99745	0.99968	18920	0	2.5689	0.0025703	0.0071849	0.93883	161	3	2.5689
	WDR13	5	0.8826	0.88306	1	15286	0	0.91484	0.00035414	0.0016111	0.176088	162	4	0.91484		ZNF730	3	0.99742	0.99745	0.99968	18919	0	2.2189	0.00258	0.0072168	0.93883	162	3	2.2189
	SLC25A37	5	0.99965	0.99965	1	17902	0	1.1226	0.00035426	0.0016111	0.176088	163	5	1.1226		FAM72C	3	0.055797	0.12685	0.974719	2573	2	-0.72639	0.0025829	0.0072251	0.93883	163	1	-0.72639
	CHEK2	5	0.92887	0.92913	1	16164	0	1.6718	0.00035431	0.0016111	0.176088	164	4	1.6718		C22orf15	3	0.57378	0.60206	0.999665	11841	1	1.6061	0.0026255	0.0073389	0.93883	164	2	1.6061
	MCAT	5	0.99964	0.99965	1	17901	0	1.0275	0.00035563	0.0016139	0.176088	165	5	1.0275		VAMP3	3	0.99736	0.99739	0.99968	18918	0	2.7874	0.002635	0.0073645	0.93883	165	3	2.7874
	F11R	5	0.96277	0.96296	1	16860	0	1.2723	0.00036409	0.001654	0.177894	166	4	1.2723		CACNB2	15	0.23363	0.54513	0.997083	7052	2	1.2543	0.0026385	0.020639	0.968017	166	13	1.2543
	SNX7	5	0.36527	0.52813	1	9069	2	0.18758	0.0003654	0.0016601	0.177894	167	2	0.18758		ARHGEF16	3	0.62561	0.64057	0.999665	12522	1	3.914	0.002654	0.0074173	0.93883	167	2	3.914
	NFKBIZ	5	0.99577	0.99577	1	17736	0	1.1244	0.00037026	0.0016799	0.17895	168	5	1.1244		MARCKS	3	0.38281	0.48253	0.997083	9555	1	3.4281	0.0026689	0.0074585	0.93883	168	2	3.4281
	C1QTNF8	5	0.99961	0.99961	1	17899	0	1.0867	0.00038828	0.0017596	0.186342	169	5	1.0867		TAPBPL	3	0.2179	0.33589	0.991358	6659	1	3.8748	0.002699	0.0075358	0.93883	169	2	3.8748
	UBE2E1	7	0.99961	0.99961	1	17898	0	1.0279	0.00039144	0.0023145	0.219307	170	7	1.0279		AP4S1	9	0.98456	0.98476	0.999665	18663	0	1.5363	0.0027155	0.01731	0.968017	170	8	1.5363
	FRMD6	5	0.99961	0.9996	1	17897	0	1.4179	0.00039431	0.0017838	0.1878	171	5	1.4179		MRPS7	3	0.8412	0.84116	0.999665	16031	0	3.2515	0.0027267	0.0076151	0.93883	171	2	3.2515
	BCR	5	0.98672	0.9868	1	17448	0	1.2166	0.00040062	0.0018157	0.190047	172	5	1.2166		NTN5	3	0.98701	0.98715	0.999665	18708	0	3.8709	0.0027393	0.0076511	0.93883	172	3	3.8709
	GSKIP	5	0.97126	0.9714	1	17048	0	1.1788	0.00040385	0.0018317	0.190608	173	4	1.1788		CSMD2	6	0.11501	0.27678	0.991165	4212	2	1.5445	0.0027742	0.013683	0.968017	173	4	1.5445
	ITM2C	5	0.96797	0.96816	1	16976	0	0.77513	0.00040629	0.001846	0.190992	174	4	0.77513		TLR9	3	0.99723	0.99726	0.99968	18917	0	2.7425	0.0027743	0.0077399	0.93883	174	3	2.7425
	TSSK6	5	0.96701	0.96721	1	16955	0	1.0744	0.0004177	0.0018982	0.194504	175	4	1.0744		ANGPTL3	3	0.72054	0.72131	0.999665	13990	1	-0.11417	0.0027961	0.0078015	0.93883	175	1	-0.11417
	RASSF7	5	0.92917	0.92943	1	16169	0	1.3253	0.00041819	0.0019015	0.194504	176	3	1.3253		TMED2	3	0.90134	0.90143	0.999665	17099	0	3.5853	0.0027978	0.0078041	0.93883	176	3	3.5853
	USP7	5	0.88424	0.88469	1	15319	0	2.2479	0.00042452	0.0019361	0.196929	177	4	2.2479		ICAM5	3	0.98845	0.9886	0.999665	18735	0	1.6658	0.0028388	0.0079195	0.93883	177	3	1.6658
	PKDREJ	5	0.99956	0.99955	1	17895	0	0.95252	0.00043929	0.0020082	0.203109	178	5	0.95252		MDP1	3	0.99716	0.99719	0.99968	18915	0	2.845	0.0028398	0.0079205	0.93883	178	3	2.845
	GTPBP8	5	0.99955	0.99954	1	17894	0	0.91022	0.00044628	0.0020368	0.203982	179	5	0.91022		CCNH	6	0.58073	0.72966	0.999665	11916	2	1.3896	0.0028406	0.013996	0.968017	179	3	1.3896
	PROSER2	5	0.9743	0.97443	1	17110	0	1.3317	0.00044663	0.0020395	0.203982	180	4	1.3317		PLA2G12B	3	0.90385	0.90388	0.999665	17141	0	0.93278	0.0028814	0.0080448	0.943925	180	3	0.93278
	TRIB1	5	0.99955	0.99954	1	17893	0	1.329	0.00044899	0.0020508	0.203982	181	5	1.329		TICAM1	3	0.98023	0.98033	0.999665	18586	0	4.2245	0.0029113	0.0081314	0.946091	181	3	4.2245
	ZNF397	5	0.99955	0.99953	1	17892	0	1.0068	0.0004529	0.0020703	0.204793	182	5	1.0068		ANO6	6	0.53757	0.70018	0.999665	11375	2	0.72599	0.0029447	0.014482	0.968017	182	4	0.72599
	PLEKHA1	5	0.99954	0.99953	1	17891	0	1.2431	0.00046248	0.0021116	0.207731	183	5	1.2431		PPP1R14B	3	0.59231	0.61552	0.999665	12056	1	-0.12839	0.0029667	0.008274	0.946946	183	1	-0.12839
	ARSA	5	0.86633	0.86711	1	14977	1	2.31	0.0004729	0.0021561	0.210961	184	4	2.31		OXA1L	3	0.92864	0.92877	0.999665	17591	0	3.2841	0.0029742	0.0082886	0.946946	184	3	3.2841
	OSGIN1	5	0.99952	0.99952	1	17890	0	0.79218	0.00047592	0.0021754	0.211694	185	5	0.79218		TSPO2	6	0.99701	0.99699	0.99968	18914	0	1.2515	0.0029945	0.014719	0.968017	185	6	1.2515
	ADAM10	5	0.97855	0.97871	1	17224	0	1.1469	0.00048935	0.002232	0.216039	186	5	1.1469		NATD1	3	0.99177	0.9919	0.999665	18807	0	3.1778	0.0030094	0.0083914	0.952955	186	3	3.1778
	LGALS4	5	0.99951	0.9995	1	17889	0	0.9097	0.00049233	0.0022469	0.216313	187	5	0.9097		CAMTA2	6	0.91787	0.91939	0.999665	17391	1	2.1749	0.0030274	0.014874	0.968017	187	5	2.1749
	PFKFB3	5	0.96392	0.96411	1	16881	0	1.5517	0.00049526	0.0022634	0.216742	188	4	1.5517		TEX28	6	0.12034	0.28669	0.991358	4328	3	-1.2046	0.0030299	0.014886	0.968017	188	1	-1.2046
	PACSIN2	5	0.9995	0.99949	1	17888	0	0.80385	0.00049807	0.0022788	0.217062	189	5	0.80385		IGSF11	6	0.99663	0.9966	0.999665	18906	0	1.6403	0.0030306	0.014889	0.968017	189	6	1.6403
	C9orf163	5	0.99948	0.99947	1	17887	0	0.78004	0.00051812	0.0023629	0.22272	190	5	0.78004		TBX22	6	0.38099	0.59901	0.999665	9537	2	0.41758	0.0030481	0.014975	0.968017	190	3	0.41758
	GNAZ	5	0.96385	0.96403	1	16878	0	1.1493	0.0005266	0.0023954	0.224603	191	4	1.1493		WDR4	6	0.095099	0.23865	0.988921	3657	4	-0.41755	0.0030775	0.015115	0.968017	191	2	-0.41755
	CYB5A	5	0.44269	0.59534	1	10170	2	-0.1516	0.00054512	0.002474	0.230606	192	2	-0.1516		ZNF546	3	0.94663	0.94681	0.999665	17926	0	2.7264	0.0030947	0.0086144	0.956897	192	3	2.7264
	HLA-DMB	5	0.92019	0.92052	1	16001	0	1.3079	0.00054763	0.002485	0.230606	193	4	1.3079		SLC18A3	3	0.99688	0.99692	0.999665	18913	0	2.032	0.0031165	0.008678	0.956897	193	3	2.032
	YWHAZ	3	0.99537	0.99547	1	17724	0	1.9641	0.00055625	0.001643	0.177894	194	3	1.9641		CDC25B	9	0.075664	0.23166	0.988233	3102	3	0.60893	0.0031217	0.019431	0.968017	194	5	0.60893
	CCDC92	5	0.047075	0.1334	0.914929	2585	1	1.0631	0.00055663	0.0025197	0.231316	195	4	1.0631		DRG2	3	0.99687	0.99691	0.999665	18912	0	2.3511	0.0031302	0.0087156	0.956897	195	3	2.3511
	MARCH2	5	0.99656	0.99655	1	17758	0	1.5378	0.00055725	0.0025252	0.231316	196	5	1.5378		TSPAN33	3	0.098717	0.18381	0.983159	3777	2	-1.0383	0.0031373	0.0087376	0.956897	196	1	-1.0383
	ALKBH5	5	0.99944	0.99943	1	17886	0	1.0106	0.00055932	0.0025312	0.231316	197	5	1.0106		JAKMIP3	3	0.99685	0.9969	0.999665	18911	0	2.6043	0.0031541	0.0087793	0.956897	197	3	2.6043
	SLC14A2	5	0.97459	0.97476	1	17120	0	1.1066	0.00056722	0.0025692	0.233598	198	5	1.1066		FGFR4	6	0.49733	0.67344	0.999665	10881	2	1.8245	0.0031935	0.015619	0.968017	198	4	1.8245
	ZNF280C	5	0.983	0.9831	1	17343	0	1.1691	0.00057769	0.0026148	0.236015	199	5	1.1691		KIAA0040	6	0.88861	0.89813	0.999665	16844	1	1.9537	0.0032047	0.015686	0.968017	199	5	1.9537
	TJP2	5	0.77998	0.80208	1	13750	1	0.99355	0.00057961	0.002622	0.236015	200	4	0.99355		SHOC2	6	0.79327	0.85164	0.999665	15229	1	1.28	0.0032083	0.015698	0.968017	200	3	1.28
	WDR6	5	0.9916	0.99167	1	17595	0	1.3194	0.00062502	0.0028199	0.252574	201	5	1.3194		URB2	3	0.61413	0.63181	0.999665	12366	1	3.9328	0.0032131	0.0089219	0.961087	201	2	3.9328
	CALML4	10	0.99322	0.99331	1	17659	0	0.67322	0.00062659	0.0048174	0.344197	202	9	0.67322		SLC22A12	3	0.61957	0.63591	0.999665	12436	1	3.8509	0.0032226	0.0089511	0.961087	202	2	3.8509
	ATMIN	5	0.99937	0.99936	1	17884	0	1.2332	0.00062799	0.0028375	0.252892	203	5	1.2332		TNFAIP8L1	6	0.99675	0.99673	0.999665	18910	0	1.378	0.0032491	0.015876	0.968017	203	6	1.378
	UBL4B	5	0.85923	0.86052	1	14857	1	1.1098	0.00064406	0.0029112	0.258182	204	3	1.1098		HMGN4	3	0.99675	0.9968	0.999665	18909	0	2.1075	0.0032534	0.0090346	0.961087	204	3	2.1075
	GDF7	5	0.99052	0.99059	1	17556	0	1.1736	0.00065735	0.0029706	0.262158	205	5	1.1736		SSTR4	3	0.93978	0.93994	0.999665	17820	0	3.5033	0.003257	0.0090472	0.961087	205	3	3.5033
	IRF6	5	0.99933	0.99933	1	17882	0	1.5312	0.0006659	0.0030124	0.262998	206	5	1.5312		KIAA0319	9	0.74523	0.87983	0.999665	14425	2	0.95617	0.003264	0.020202	0.968017	206	7	0.95617
	TOB2	5	0.99793	0.99791	1	17812	0	1.3328	0.00066848	0.0030212	0.262998	207	5	1.3328		PSD4	3	0.074929	0.15236	0.983159	3088	2	-1.5513	0.0032652	0.0090712	0.961087	207	1	-1.5513
	DAB2IP	5	0.99599	0.99599	1	17748	0	0.97151	0.00066875	0.003024	0.262998	208	5	0.97151		PEX5L	6	0.99673	0.99671	0.999665	18908	0	1.3558	0.0032679	0.015957	0.968017	208	6	1.3558
	SOCS5	5	0.99497	0.99499	1	17709	0	1.5675	0.00069468	0.0031257	0.269245	209	5	1.5675		OTX1	6	0.91159	0.91431	0.999665	17276	1	0.13304	0.0032856	0.016034	0.968017	209	2	0.13304
	ELMSAN1	5	0.71675	0.76644	1	13049	1	1.5736	0.00071563	0.0032159	0.275695	210	4	1.5736		TSSK6	3	0.39234	0.48777	0.997083	9670	1	3.7112	0.0032901	0.0091401	0.962611	210	2	3.7112
	GADL1	5	0.43394	0.58777	1	10055	1	0.96112	0.00072076	0.0032357	0.276078	211	3	0.96112		AFF1	6	0.99669	0.99666	0.999665	18907	0	1.8628	0.0033065	0.016136	0.968017	211	6	1.8628
	CACUL1	5	0.99927	0.99927	1	17881	0	0.92596	0.00072774	0.0032654	0.277251	212	5	0.92596		VWA5B2	3	0.29518	0.43052	0.99446	8474	1	0.49401	0.0033078	0.0091871	0.962611	212	2	0.49401
	CXXC1	5	0.99927	0.99926	1	17880	0	1.3695	0.00073087	0.0032803	0.277251	213	5	1.3695		ARHGAP20	9	0.85124	0.9253	0.999665	16199	1	1.0798	0.0033251	0.020509	0.968017	213	6	1.0798
	ZBTB7A	5	0.97697	0.97713	1	17178	0	0.94592	0.00074252	0.0033347	0.280536	214	5	0.94592		LILRA3	4	0.39576	0.54259	0.997083	9709	1	2.6062	0.0033592	0.011907	0.968017	214	3	2.6062
	CCDC17	5	0.96706	0.96727	1	16957	0	1.0763	0.00074627	0.0033523	0.280705	215	4	1.0763		KIAA1456	6	0.19404	0.38547	0.993744	6110	3	-0.04592	0.0033708	0.016462	0.968017	215	3	-0.04592
	MIDN	5	0.99923	0.99923	1	17879	0	1.1204	0.0007671	0.003448	0.287381	216	5	1.1204		APPL2	6	0.96691	0.96709	0.999665	18324	0	1.7216	0.0033714	0.016463	0.968017	216	5	1.7216
	HDAC2	5	0.99923	0.99923	1	17878	0	1.1117	0.00077345	0.0034722	0.288064	217	5	1.1117		GOLGA3	6	0.99662	0.99659	0.999665	18905	0	1.2199	0.0033797	0.0165	0.968017	217	6	1.2199
	IFT57	5	0.9927	0.99277	1	17632	0	1.9292	0.00078803	0.0035415	0.291265	218	5	1.9292		CBX7	3	0.99427	0.99436	0.999665	18857	0	3.7996	0.0033848	0.0093844	0.968017	218	3	3.7996
	CDC37	5	0.69466	0.75551	1	12845	1	2.1142	0.00078862	0.0035431	0.291265	219	3	2.1142		C10orf120	3	0.12046	0.2121	0.988233	4332	1	3.3904	0.0034298	0.0095024	0.968017	219	2	3.3904
	FAM49B	5	0.99745	0.99745	1	17795	0	1.3696	0.00079755	0.0035816	0.293092	220	5	1.3696		PDXP	3	0.45252	0.52281	0.997083	10360	1	0.98582	0.0034357	0.0095175	0.968017	220	2	0.98582
	ZFR2	8	0.97582	0.97593	1	17149	0	0.75828	0.00081495	0.0053135	0.355607	221	7	0.75828		FAN1	4	0.99656	0.99659	0.999665	18904	0	2.0358	0.0034416	0.012192	0.968017	221	4	2.0358
	CLIC5	5	0.79214	0.80979	1	13895	1	1.7289	0.00082778	0.0037076	0.300665	222	3	1.7289		ABCG1	15	0.030223	0.13562	0.979332	1574	4	0.75203	0.0034609	0.026213	0.973885	222	9	0.75203
	MAP3K1	5	0.98929	0.98938	1	17524	0	1.4353	0.0008428	0.0037736	0.30336	223	5	1.4353		CCNA1	6	0.99653	0.99651	0.999665	18903	0	1.4265	0.0034679	0.016902	0.968017	223	6	1.4265
	MIF	5	0.99915	0.99916	1	17876	0	0.92253	0.000847	0.0037879	0.30336	224	5	0.92253		CRKL	3	0.85154	0.85155	0.999665	16208	0	3.5573	0.0034784	0.0096313	0.968017	224	2	3.5573
	FCHO1	5	0.96081	0.96096	1	16814	0	1.3098	0.00084938	0.0037972	0.30336	225	3	1.3098		OR51I1	3	0.37028	0.47552	0.997083	9396	1	3.4037	0.0035523	0.0098438	0.968017	225	2	3.4037
	SFXN4	4	0.91936	0.91914	1	15982	0	1.7476	0.00084942	0.0030751	0.266161	226	3	1.7476		DAO	3	0.22076	0.33941	0.991358	6731	2	-0.91137	0.0035636	0.0098751	0.968017	226	1	-0.91137
	RGL4	5	0.99915	0.99916	1	17875	0	0.99452	0.00085289	0.0038082	0.30336	227	5	0.99452		TADA1	3	0.99269	0.99281	0.999665	18828	0	4.1032	0.0035955	0.0099519	0.968017	227	3	4.1032
	TMEM65	5	0.99913	0.99914	1	17874	0	1.1392	0.00086538	0.0038566	0.304197	228	5	1.1392		COX10	3	0.9964	0.99647	0.999665	18902	0	2.2392	0.003596	0.0099566	0.968017	228	3	2.2392
	FXR1	5	0.99793	0.99792	1	17813	0	1.2519	0.00086819	0.0038671	0.304197	229	5	1.2519		ZNF106	6	0.9964	0.99638	0.999665	18901	0	1.8459	0.0035978	0.017528	0.968017	229	6	1.8459
	PRPF4	5	0.41108	0.56792	1	9734	1	1.2411	0.00087117	0.0038792	0.304197	230	3	1.2411		ZNF345	9	0.97873	0.97941	0.999665	18549	1	1.5029	0.0036112	0.021995	0.973885	230	8	1.5029
	PEX26	5	0.99913	0.99913	1	17873	0	1.0976	0.00087258	0.0038863	0.304197	231	5	1.0976		SLFNL1	4	0.85056	0.85003	0.999665	16183	0	1.827	0.0036128	0.012776	0.968017	231	3	1.827
	NEUROD1	5	0.42359	0.57869	1	9916	1	1.3363	0.00089322	0.0039754	0.309769	232	4	1.3363		BTBD7	3	0.062591	0.13598	0.979332	2762	1	3.858	0.0036331	0.010053	0.968017	232	2	3.858
	ARHGAP4	5	0.25886	0.43827	1	7539	1	0.9794	0.00090183	0.0040101	0.309841	233	4	0.9794		FAM104B	5	0.97006	0.97014	0.999665	18384	0	1.8633	0.0036358	0.01541	0.968017	233	5	1.8633
	RCN2	5	0.85711	0.85863	1	14823	1	1.045	0.00092252	0.0040986	0.314471	234	3	1.045		MS4A1	3	0.26253	0.39089	0.994188	7734	2	-0.27064	0.0036915	0.010212	0.968017	234	1	-0.27064
	TRAPPC2L	5	0.11348	0.24434	0.990359	4423	2	0.322	0.00092735	0.0041228	0.314471	235	3	0.322		ZNF285	3	0.99626	0.99633	0.999665	18899	0	2.787	0.0037372	0.010341	0.968017	235	3	2.787
	ADRBK2	5	0.4769	0.62548	1	10642	2	1.4074	0.00093017	0.0041332	0.314471	236	3	1.4074		FBXO47	3	0.99626	0.99633	0.999665	18898	0	3.1613	0.0037382	0.010342	0.968017	236	3	3.1613
	XYLB	5	0.99755	0.99754	1	17799	0	1.317	0.00093143	0.0041398	0.314471	237	5	1.317		INMT	3	0.89068	0.89073	0.999665	16889	0	2.3698	0.0037767	0.010445	0.968017	237	3	2.3698
	SEPT1	5	0.99906	0.99906	1	17872	0	1.052	0.00094235	0.0041915	0.31706	238	5	1.052		BCL9L	3	0.3117	0.44414	0.995666	8740	1	3.425	0.0038123	0.010536	0.968017	238	2	3.425
	CDPF1	5	0.99904	0.99905	1	17871	0	0.97502	0.00095544	0.004252	0.319851	239	5	0.97502		NUDCD1	6	0.99619	0.99618	0.999665	18896	0	0.82105	0.0038135	0.018494	0.968017	239	6	0.82105
	GUCD1	5	0.98196	0.9821	1	17316	0	0.54217	0.00095888	0.0042641	0.319851	240	5	0.54217		FAM8A1	3	0.98605	0.98621	0.999665	18688	0	2.1338	0.0038194	0.010555	0.968017	240	3	2.1338
	EXPH5	5	0.99904	0.99904	1	17870	0	0.93098	0.00096259	0.0042817	0.319851	241	5	0.93098		PCDHB9	3	0.99615	0.99622	0.999665	18894	0	2.1989	0.0038526	0.010644	0.968017	241	3	2.1989
	QPRT	5	0.92046	0.92079	1	16009	0	1.0751	0.000974	0.0043389	0.322785	242	4	1.0751		MBTPS1	3	0.89202	0.89207	0.999665	16919	0	0.51342	0.003862	0.010662	0.968017	242	3	0.51342
	CEP68	5	0.9941	0.99413	1	17685	0	1.3186	0.0010026	0.004466	0.329512	243	5	1.3186		SH3D21	6	0.99612	0.99613	0.999665	18893	0	1.6514	0.0038766	0.018778	0.968017	243	6	1.6514
	RBM47	5	0.99899	0.999	1	17869	0	1.1932	0.0010106	0.0045023	0.330835	244	5	1.1932		UBA7	3	0.99612	0.9962	0.999665	18892	0	3.671	0.0038789	0.010714	0.968017	244	3	3.671
	FBXO15	4	0.10984	0.23232	0.985434	4314	3	-0.2537	0.0010116	0.0036427	0.296738	245	1	-0.2537		TANC2	3	0.8686	0.86865	0.999665	16505	0	3.7524	0.003881	0.01072	0.968017	245	3	3.7524
	GDF15	5	0.75469	0.78689	1	13451	1	1.6736	0.0010193	0.0045397	0.331803	246	3	1.6736		ATPAF1	6	0.96137	0.9615	0.999665	18202	0	2.0488	0.0038857	0.018815	0.968017	246	4	2.0488
	AKIP1	5	0.99812	0.99811	1	17819	0	1.3468	0.0010221	0.0045523	0.331803	247	5	1.3468		CTAG2	3	0.89563	0.89572	0.999665	16991	0	3.087	0.0039927	0.011039	0.968017	247	3	3.087
	MAZ	9	0.99317	0.9933	1	17654	0	0.8305	0.0010325	0.0070965	0.405579	248	8	0.8305		LOC100996693	3	0.996	0.99608	0.999665	18891	0	1.8681	0.0039961	0.011052	0.968017	248	3	1.8681
	TMBIM1	5	0.99895	0.99896	1	17867	0	0.78408	0.0010452	0.00467	0.339009	249	5	0.78408		GAPDH	9	0.19082	0.43609	0.995342	6025	2	0.89693	0.0040135	0.02398	0.973885	249	6	0.89693
	TSPAN14	5	0.94754	0.94773	1	16529	0	1.2831	0.0010642	0.0047558	0.343149	250	4	1.2831		LAMC3	3	0.806	0.80587	0.999665	15443	0	3.8372	0.0040293	0.011143	0.968017	250	2	3.8372
	SZT2	5	0.49915	0.64532	1	10932	1	1.2625	0.0010669	0.0047652	0.343149	251	4	1.2625		TTK	3	0.10777	0.19564	0.986185	4017	2	-1.2946	0.0040325	0.011148	0.968017	251	1	-1.2946
	THBS3	5	0.9989	0.99891	1	17866	0	1.0484	0.0011001	0.0049219	0.346939	252	5	1.0484		STAM2	3	0.99596	0.99604	0.999665	18890	0	2.7308	0.0040382	0.01116	0.968017	252	3	2.7308
	DDIT4	5	0.72906	0.77279	1	13168	1	1.3024	0.0011012	0.0049268	0.346939	253	4	1.3024		CCDC136	6	0.13552	0.314	0.991358	4725	3	0.47848	0.0040524	0.019557	0.968017	253	3	0.47848
	PHF12	5	0.99889	0.9989	1	17865	0	1.0177	0.0011054	0.0049455	0.346939	254	5	1.0177		SUB1	3	0.99594	0.99603	0.999665	18889	0	1.787	0.0040621	0.011219	0.968017	254	3	1.787
	EPX	5	0.99889	0.9989	1	17864	0	0.87754	0.0011059	0.0049466	0.346939	255	5	0.87754		FGD2	3	0.092231	0.17528	0.983159	3578	2	-1.8824	0.0040751	0.011246	0.968017	255	1	-1.8824
	HOMER2	4	0.78028	0.78187	1	13753	1	1.1917	0.001106	0.0039919	0.309769	256	3	1.1917		FAM105A	3	0.99589	0.99598	0.999665	18888	0	4.0878	0.004109	0.011334	0.968017	256	3	4.0878
	PEX10	5	0.99889	0.9989	1	17863	0	1.4685	0.0011069	0.0049527	0.346939	257	5	1.4685		BCAT2	3	0.99527	0.99539	0.999665	18877	0	3.6991	0.0041121	0.011344	0.968017	257	3	3.6991
	PVRL4	5	0.59477	0.71276	1	12053	1	1.2026	0.0011227	0.0050214	0.348906	258	4	1.2026		KRTAP5-9	3	0.76283	0.76309	0.999665	14708	0	0.91168	0.0041177	0.011361	0.968017	258	2	0.91168
	RREB1	5	0.57916	0.70686	1	11946	1	1.3899	0.0011279	0.0050396	0.348906	259	4	1.3899		SLC19A2	3	0.99587	0.99596	0.999665	18887	0	2.871	0.0041332	0.011398	0.968017	259	3	2.871
	TGFBR1	5	0.53182	0.67479	1	11384	1	1.7581	0.0011317	0.0050583	0.348906	260	4	1.7581		SLC22A18	6	0.65341	0.78186	0.999665	12939	2	-0.022306	0.0041376	0.019926	0.968017	260	2	-0.022306
	NR2F6	5	0.97039	0.97054	1	17032	0	0.87251	0.0011472	0.0051309	0.351729	261	4	0.87251		DNAH5	3	0.0026614	0.0074402	0.962523	163	2	-2.5171	0.0041603	0.011462	0.968017	261	1	-2.5171
	TRUB1	5	0.99885	0.99886	1	17861	0	0.97719	0.0011523	0.0051457	0.351729	262	5	0.97719		SLC38A3	3	0.97366	0.97379	0.999665	18451	0	3.6716	0.0041616	0.011463	0.968017	262	3	3.6716
	IGLL5	5	0.016726	0.054585	0.779907	1239	1	1.2233	0.0011559	0.0051578	0.351729	263	4	1.2233		KIAA1324L	6	0.87434	0.88951	0.999665	16583	1	1.5497	0.0041689	0.020062	0.968017	263	5	1.5497
	RPE	8	0.99817	0.99816	1	17824	0	1.5463	0.0011573	0.0074022	0.409595	264	8	1.5463		CUL4A	12	0.16477	0.41993	0.994188	5435	3	0.87507	0.0041772	0.028784	0.973885	264	8	0.87507
	MNT	5	0.029473	0.088823	0.854206	1837	1	1.9381	0.0011723	0.0052244	0.353625	265	4	1.9381		SIRPA	9	0.7231	0.87146	0.999665	14035	1	1.1993	0.0041796	0.024847	0.973885	265	8	1.1993
	TCN2	5	0.99883	0.99883	1	17860	0	0.62933	0.0011727	0.0052249	0.353625	266	5	0.62933		TMEM119	3	0.52181	0.56659	0.997125	11209	1	1.1377	0.0042029	0.011578	0.968017	266	2	1.1377
	AIRE	5	0.49646	0.6429	1	10904	1	1.1225	0.0011865	0.0052843	0.355607	267	4	1.1225		KIAA1522	6	0.034904	0.11263	0.974719	1780	2	-0.15758	0.0042227	0.020294	0.968017	267	2	-0.15758
	C11orf87	5	0.99881	0.99881	1	17859	0	1.0066	0.0011899	0.0052975	0.355607	268	5	1.0066		DFNA5	6	0.96368	0.96389	0.999665	18249	0	2.0003	0.0042431	0.020381	0.968017	268	5	2.0003
	PEX6	5	0.99198	0.99204	1	17606	0	1.1544	0.0011975	0.0053393	0.356014	269	5	1.1544		PLCB3	3	0.94754	0.94776	0.999665	17946	0	1.1021	0.0042455	0.011709	0.968017	269	3	1.1021
	FFAR4	4	0.21864	0.35465	1	6933	1	1.3634	0.0012089	0.0043587	0.322923	270	3	1.3634		TMEM234	3	0.99571	0.99581	0.999665	18886	0	1.9311	0.0042869	0.01183	0.968017	270	3	1.9311
	C16orf92	5	0.36466	0.5276	1	9063	1	1.538	0.0012186	0.0054251	0.3604	271	4	1.538		SALL2	6	0.063685	0.17519	0.983159	2800	4	-0.7496	0.0043079	0.02069	0.968017	271	2	-0.7496
	DPP9	5	0.99877	0.99877	1	17858	0	0.85525	0.0012303	0.0054746	0.362351	272	5	0.85525		GUK1	9	0.010236	0.048233	0.962523	567	5	-0.92694	0.0043085	0.025514	0.973885	272	3	-0.92694
	SEC14L6	5	0.97068	0.97083	1	17038	0	1.4807	0.001247	0.0055461	0.364512	273	4	1.4807		CDH17	6	0.88102	0.89341	0.999665	16715	1	0.46114	0.0043129	0.020709	0.968017	273	4	0.46114
	PA2G4	5	0.56434	0.70151	1	11837	1	0.3908	0.0012473	0.0055478	0.364512	274	4	0.3908		SERPINF1	3	0.97604	0.97621	0.999665	18494	0	2.7531	0.004315	0.011909	0.968017	274	3	2.7531
	SIGLEC10	5	0.10213	0.22644	0.981392	4125	1	0.79629	0.0012596	0.0056033	0.366823	275	4	0.79629		RGS3	24	0.0087115	0.059058	0.962523	475	10	0.04042	0.0043294	0.03746	0.976916	275	9	0.04042
	BST1	5	0.95429	0.95449	1	16657	0	1.1943	0.0012708	0.0056495	0.368507	276	4	1.1943		TSKU	6	0.96462	0.9648	0.999665	18269	0	2.0468	0.0043447	0.020852	0.969241	276	4	2.0468
	AREG	5	0.61307	0.71996	1	12181	1	-0.30706	0.0012819	0.0056929	0.37	277	2	-0.30706		CCL3	3	0.89782	0.89792	0.999665	17035	0	1.1952	0.0043733	0.012064	0.968017	277	3	1.1952
	CSHL1	6	0.99872	0.99869	1	17856	0	0.88692	0.0012845	0.0065734	0.395697	278	6	0.88692		TBC1D26	3	0.99561	0.99572	0.999665	18885	0	1.7432	0.0043938	0.012121	0.968017	278	3	1.7432
	CPSF1	5	0.99854	0.99853	1	17847	0	1.6228	0.0013119	0.0058293	0.377502	279	5	1.6228		ELAC1	3	0.72719	0.7277	0.999665	14107	1	2.0117	0.0044159	0.012189	0.968017	279	2	2.0117
	DOK1	5	0.96217	0.96235	1	16849	0	1.3377	0.0013202	0.0058645	0.37842	280	4	1.3377		COLGALT2	3	0.99558	0.99569	0.999665	18884	0	1.9648	0.0044214	0.012204	0.968017	280	3	1.9648
	ERN2	5	0.99705	0.99706	1	17774	0	1.0906	0.0013335	0.0059228	0.380817	281	5	1.0906		NLE1	5	0.96794	0.96808	0.999665	18346	0	2.3773	0.004443	0.018633	0.968017	281	5	2.3773
	PEX3	4	0.99866	0.99867	1	17854	0	1.8015	0.0013384	0.004818	0.344197	282	4	1.8015		CA11	3	0.99554	0.99565	0.999665	18883	0	3.102	0.0044571	0.012315	0.968017	282	3	3.102
	ZC3H14	12	0.54448	0.79051	1	11572	2	0.96614	0.001347	0.010277	0.471683	283	10	0.96614		DAZAP1	3	0.80856	0.80847	0.999665	15501	0	0.6726	0.0044585	0.012318	0.968017	283	2	0.6726
	SATB2	5	0.99864	0.99863	1	17853	0	1.0465	0.0013578	0.0060163	0.383386	284	5	1.0465		CELF3	6	0.22992	0.42775	0.994188	6961	2	2.3407	0.0045117	0.021578	0.973885	284	4	2.3407
	SLC23A2	5	0.4407	0.59363	1	10142	2	0.591	0.0013602	0.0060246	0.383386	285	3	0.591		WDR34	3	0.98889	0.989	0.999665	18747	0	3.3808	0.0045484	0.012578	0.968017	285	3	3.3808
	DNM1	5	0.58928	0.71066	1	12012	1	0.61559	0.0013767	0.0060878	0.383386	286	4	0.61559		TRIM63	3	0.9954	0.99552	0.999665	18882	0	2.2029	0.004601	0.012728	0.968017	286	3	2.2029
	LRRC57	5	0.99862	0.99861	1	17852	0	0.87885	0.0013771	0.0060884	0.383386	287	5	0.87885		CBS	6	0.9954	0.9954	0.999665	18881	0	1.6317	0.0046039	0.02198	0.973885	287	6	1.6317
	GDPD3	5	0.99862	0.99861	1	17851	0	1.0351	0.0013774	0.0060906	0.383386	288	5	1.0351		HGH1	3	0.99533	0.99545	0.999665	18878	0	1.9732	0.0046699	0.012907	0.968017	288	3	1.9732
	ZNF740	5	0.96941	0.96955	1	17009	0	1.7579	0.0013927	0.006145	0.385466	289	4	1.7579		HCRT	3	0.63762	0.65005	0.999665	12701	1	-0.28794	0.0047141	0.013036	0.968017	289	1	-0.28794
	SH2D3A	4	0.98408	0.98413	1	17378	0	1.0369	0.001406	0.0050572	0.348906	290	4	1.0369		HNRNPH2	3	0.94655	0.94673	0.999665	17923	0	3.2272	0.0047481	0.013125	0.968017	290	3	3.2272
	CORO1A	5	0.9684	0.9686	1	16986	0	0.2994	0.0014066	0.0061951	0.387256	291	3	0.2994		VPS13D	3	0.72908	0.72948	0.999665	14138	1	1.6171	0.0047567	0.013149	0.968017	291	2	1.6171
	ENOPH1	5	0.12505	0.26222	0.990693	4725	1	0.95679	0.0014159	0.0062407	0.387658	292	4	0.95679		SLC24A2	3	0.99519	0.99531	0.999665	18876	0	1.8022	0.004811	0.013282	0.968017	292	3	1.8022
	NFKBIA	5	0.97906	0.97922	1	17237	0	0.56999	0.0014171	0.0062446	0.387658	293	5	0.56999		DNAJB9	3	0.23582	0.35802	0.992088	7094	2	-0.56371	0.0048419	0.013363	0.968017	293	1	-0.56371
	ARHGAP20	5	0.99857	0.99856	1	17850	0	0.77071	0.0014326	0.0063163	0.389321	294	5	0.77071		LIN54	6	0.15582	0.33896	0.991358	5199	3	0.55139	0.0048536	0.023083	0.973885	294	3	0.55139
	IDH2	5	0.33878	0.50555	1	8697	1	0.15177	0.0014329	0.0063183	0.389321	295	1	0.15177		TMC8	3	0.56902	0.5987	0.999665	11775	1	3.7527	0.0048545	0.013395	0.968017	295	2	3.7527
	MEX3C	5	0.88276	0.88322	1	15292	0	0.85284	0.0014416	0.0063557	0.389321	296	4	0.85284		GTF2H2	3	0.99513	0.99524	0.999665	18875	0	1.8892	0.0048721	0.013443	0.968017	296	3	1.8892
	RNF40	5	0.99856	0.99855	1	17849	0	0.9579	0.0014425	0.0063579	0.389321	297	5	0.9579		ZNF416	3	0.90691	0.90699	0.999665	17194	0	1.9765	0.0048845	0.013472	0.968017	297	3	1.9765
	XXYLT1	5	0.99855	0.99854	1	17848	0	0.781	0.0014527	0.0063974	0.390418	298	5	0.781		NFAM1	3	0.078097	0.15669	0.983159	3172	1	3.2373	0.0048914	0.013496	0.968017	298	2	3.2373
	ATP10B	5	0.99853	0.99853	1	17846	0	0.6137	0.0014721	0.0064865	0.394518	299	5	0.6137		TRIO	3	0.99509	0.99522	0.999665	18874	0	2.6809	0.0049053	0.013528	0.968017	299	3	2.6809
	ZNF768	5	0.99741	0.99742	1	17792	0	1.2477	0.0014838	0.0065272	0.395656	300	5	1.2477		ATP2C1	14	0.10508	0.32927	0.991358	3953	5	0.45256	0.0049088	0.034287	0.973885	300	8	0.45256
	R3HDM1	5	0.37669	0.53805	1	9232	1	1.2627	0.0014928	0.0065696	0.395697	301	3	1.2627		SHANK3	3	0.99508	0.99521	0.999665	18873	0	2.7726	0.0049165	0.013564	0.968017	301	3	2.7726
	HIST1H3B	5	0.87877	0.87923	1	15211	0	1.049	0.001503	0.0066152	0.395697	302	4	1.049		NBPF11	7	0.65087	0.79437	0.999665	12901	2	1.4249	0.0049243	0.025665	0.973885	302	5	1.4249
	MAGEC2	5	0.90936	0.90972	1	15776	0	1.2585	0.001504	0.0066191	0.395697	303	4	1.2585		SPOCD1	3	0.99507	0.99518	0.999665	18872	0	1.939	0.0049338	0.013607	0.968017	303	3	1.939
	IL32	6	0.99849	0.99846	1	17845	0	0.49926	0.001507	0.0076596	0.409595	304	6	0.49926		C15orf40	3	0.99501	0.99513	0.999665	18870	0	2.9517	0.0049947	0.013767	0.968017	304	3	2.9517
	AQP8	5	0.99849	0.99849	1	17844	0	0.69254	0.0015113	0.0066521	0.395697	305	5	0.69254		RAB4A	3	0.45264	0.52289	0.997083	10361	1	0.52853	0.0050123	0.013815	0.968017	305	2	0.52853
	RPL3L	5	0.99849	0.99849	1	17843	0	0.9486	0.0015125	0.0066598	0.395697	306	5	0.9486		FAM114A1	3	0.99494	0.99507	0.999665	18869	0	2.3005	0.0050561	0.013931	0.968017	306	3	2.3005
	ZNF474	5	0.90331	0.90366	1	15670	0	2.1262	0.0015332	0.006739	0.399085	307	4	2.1262		TNNI2	9	0.097822	0.27433	0.991165	3745	2	1.56	0.0050603	0.02925	0.973885	307	7	1.56
	ZDHHC18	5	0.8199	0.82907	1	14254	1	1.3346	0.0015454	0.0067874	0.400633	308	4	1.3346		RNF44	3	0.85375	0.85377	0.999665	16244	0	2.7076	0.0050974	0.014053	0.968017	308	2	2.7076
	TRIM39	5	0.99844	0.99844	1	17842	0	0.73741	0.0015602	0.0068462	0.401231	309	5	0.73741		CCR6	6	0.4469	0.64116	0.999665	10291	2	1.9682	0.0050985	0.024147	0.973885	309	4	1.9682
	DPH5	5	0.67113	0.74448	1	12646	1	2.0144	0.0015604	0.0068462	0.401231	310	4	2.0144		MMS19	6	0.22848	0.4261	0.994188	6920	2	2.4909	0.0051797	0.02452	0.973885	310	4	2.4909
	ZC3H18	5	0.96071	0.96086	1	16812	0	1.4785	0.0015721	0.0068954	0.401743	311	4	1.4785		RNF13	3	0.67054	0.67658	0.999665	13189	1	3.1027	0.0051826	0.014279	0.968017	311	2	3.1027
	CHD2	5	0.99841	0.99842	1	17841	0	0.97928	0.0015892	0.0069667	0.404583	312	5	0.97928		PRKCZ	12	0.21724	0.50085	0.997083	6645	5	0.17691	0.0052005	0.034372	0.973885	312	5	0.17691
	VEZF1	5	0.9984	0.9984	1	17840	0	1.4415	0.0016002	0.0070195	0.405007	313	5	1.4415		ANKRD36B	3	0.16733	0.27229	0.991165	5486	1	1.1145	0.0052252	0.014396	0.968017	313	2	1.1145
	MEGF6	5	0.28367	0.45908	1	7878	2	0.35259	0.0016014	0.0070244	0.405007	314	3	0.35259		STRA6	15	0.42973	0.7445	0.999665	10093	5	1.3461	0.0052356	0.037567	0.976916	314	10	1.3461
	ABCC6	10	0.99322	0.99331	1	17660	0	0.80071	0.0016022	0.010755	0.483905	315	9	0.80071		FBXW11	3	0.98494	0.98512	0.999665	18668	0	3.5351	0.0052498	0.014465	0.968017	315	3	3.5351
	SLC25A29	5	0.99839	0.9984	1	17839	0	0.52293	0.0016058	0.0070415	0.405007	316	5	0.52293		ITPK1	3	0.89314	0.89317	0.999665	16935	0	3.0463	0.0052777	0.014534	0.968017	316	3	3.0463
	ARID2	5	0.90571	0.90608	1	15706	0	1.6283	0.0016173	0.0070882	0.405579	317	4	1.6283		UBE2O	3	0.79486	0.79491	0.999665	15249	0	3.0504	0.0052846	0.014551	0.968017	317	2	3.0504
	SPATA18	5	0.99836	0.99837	1	17838	0	0.89733	0.0016371	0.0071734	0.407518	318	5	0.89733		PRR25	3	0.11959	0.21098	0.988233	4314	1	3.5394	0.0052881	0.014563	0.968017	318	2	3.5394
	ITPRIP	5	0.74711	0.78263	1	13365	1	0.99951	0.0016384	0.0071756	0.407518	319	4	0.99951		S1PR2	3	0.9947	0.99481	0.999665	18867	0	2.9604	0.0052952	0.014583	0.968017	319	3	2.9604
	TCHHL1	5	0.98647	0.98657	1	17437	0	1.1369	0.0016494	0.0072268	0.409132	320	5	1.1369		MCCC2	3	0.99469	0.9948	0.999665	18866	0	1.834	0.0053056	0.014617	0.968017	320	3	1.834
	TRMT10C	5	0.5998	0.71476	1	12086	1	0.17105	0.0016575	0.0072653	0.409595	321	1	0.17105		NELFCD	3	0.84991	0.84991	0.999665	16174	0	3.239	0.0053195	0.014652	0.968017	321	2	3.239
	PBRM1	5	0.99788	0.99787	1	17811	0	1.5796	0.0016643	0.0072906	0.409595	322	5	1.5796		ZNF410	3	0.87049	0.87058	0.999665	16537	0	2.9905	0.005323	0.01466	0.968017	322	3	2.9905
	PPP5C	5	0.99832	0.99831	1	17836	0	1.0808	0.001682	0.0073648	0.409595	323	5	1.0808		DONSON	3	0.70443	0.70644	0.999665	13714	1	3.1426	0.0053721	0.014787	0.968017	323	2	3.1426
	C20orf112	4	0.83272	0.83207	1	14448	0	1.393	0.0016825	0.0060515	0.383386	324	3	1.393		IP6K2	3	0.99459	0.99469	0.999665	18865	0	2.5273	0.0054116	0.014877	0.968017	324	3	2.5273
	TEX14	5	0.99832	0.99831	1	17835	0	0.8043	0.0016834	0.0073731	0.409595	325	5	0.8043		CTDSP2	3	0.32461	0.45087	0.996744	8872	1	3.2699	0.0054213	0.014905	0.968017	325	2	3.2699
	ABCG8	5	0.84524	0.84858	1	14625	1	1.0033	0.0016852	0.0073835	0.409595	326	4	1.0033		RAPGEF6	3	0.99457	0.99467	0.999665	18863	0	1.6135	0.00543	0.014928	0.968017	326	3	1.6135
	TAOK3	5	0.9983	0.99829	1	17834	0	0.84985	0.0017039	0.0074578	0.409595	327	5	0.84985		MYBL1	3	0.96805	0.96823	0.999665	18350	0	3.7461	0.0054355	0.014942	0.968017	327	3	3.7461
	ZMIZ1	5	0.99829	0.99828	1	17833	0	0.90535	0.0017094	0.0074809	0.409595	328	5	0.90535		CPSF2	3	0.012073	0.031999	0.962523	667	2	-1.2003	0.0054381	0.01495	0.968017	328	1	-1.2003
	UBASH3A	5	0.99829	0.99828	1	17832	0	0.74772	0.0017131	0.0074935	0.409595	329	5	0.74772		EPC1	9	0.13449	0.3413	0.991358	4702	3	0.081473	0.005452	0.03117	0.973885	329	4	0.081473
	CST9	5	0.99608	0.99607	1	17750	0	0.96138	0.0017138	0.0074952	0.409595	330	5	0.96138		TSC22D4	3	0.99453	0.99463	0.999665	18862	0	2.7887	0.0054671	0.015024	0.968017	330	3	2.7887
	CCAR2	5	0.59228	0.71182	1	12030	1	0.95324	0.0017229	0.0075337	0.409595	331	4	0.95324		GPAM	3	0.96341	0.96364	0.999665	18243	0	0.81028	0.0054806	0.015053	0.968017	331	3	0.81028
	TXNDC17	5	0.99828	0.99827	1	17831	0	1.1879	0.0017245	0.0075408	0.409595	332	5	1.1879		IDH3B	3	0.97477	0.97493	0.999665	18468	0	2.9891	0.0054957	0.015092	0.968017	332	3	2.9891
	ZNF843	5	0.99827	0.99826	1	17830	0	0.62137	0.0017311	0.0075645	0.409595	333	5	0.62137		LCP2	3	0.032813	0.081721	0.969866	1696	2	-0.2808	0.0055232	0.015158	0.968017	333	1	-0.2808
	PKP3	5	0.99763	0.99761	1	17803	0	0.98492	0.0017336	0.0075777	0.409595	334	5	0.98492		GPR128	3	0.95631	0.9566	0.999665	18120	0	3.0343	0.0055562	0.01524	0.968017	334	3	3.0343
	TCF3	5	0.97637	0.97654	1	17162	0	1.3695	0.0017388	0.0075991	0.409595	335	5	1.3695		IL10RB	3	0.28018	0.41237	0.994188	8122	1	2.4612	0.0055658	0.01527	0.968017	335	2	2.4612
	FAM175B	5	0.49039	0.63744	1	10823	1	1.3492	0.0017409	0.0076101	0.409595	336	4	1.3492		FGFR1	6	0.99443	0.9944	0.999665	18861	0	1.2988	0.0055725	0.026229	0.973885	336	6	1.2988
	GPR68	5	0.99824	0.99823	1	17829	0	0.68817	0.0017587	0.0076849	0.409595	337	5	0.68817		LPO	3	0.74634	0.74653	0.999665	14439	0	1.5671	0.0056083	0.015388	0.968017	337	2	1.5671
	GSC2	5	0.99518	0.99519	1	17717	0	1.12	0.0017608	0.0076899	0.409595	338	5	1.12		HIST1H1E	3	0.99439	0.99448	0.999665	18860	0	2.2849	0.0056115	0.015393	0.968017	338	3	2.2849
	SH3TC1	5	0.99824	0.99823	1	17828	0	0.62769	0.0017629	0.007697	0.409595	339	5	0.62769		NAA25	3	0.99439	0.99448	0.999665	18859	0	1.5789	0.0056142	0.015402	0.968017	339	3	1.5789
	MAP2K1	5	0.22097	0.40421	1	6984	2	0.017049	0.0017698	0.0077289	0.409595	340	2	0.017049		PPP3CB	3	0.99438	0.99447	0.999665	18858	0	2.1102	0.0056196	0.015414	0.968017	340	3	2.1102
	SPAG1	5	0.99823	0.99822	1	17827	0	0.85329	0.0017718	0.0077355	0.409595	341	5	0.85329		YAP1	6	0.96476	0.96494	0.999665	18271	0	0.85401	0.0056816	0.02673	0.973885	341	5	0.85401
	COL6A1	5	0.99822	0.99821	1	17826	0	0.86565	0.0017781	0.0077603	0.409701	342	5	0.86565		TAL2	3	0.060502	0.13319	0.979103	2710	1	0.29157	0.0056935	0.015619	0.968017	342	2	0.29157
	TUFM	5	0.88413	0.88458	1	15315	0	1.7009	0.0017841	0.0077872	0.409921	343	4	1.7009		GSTZ1	6	0.74771	0.83559	0.999665	14464	1	1.715	0.0056948	0.026795	0.973885	343	5	1.715
	ATF7IP	5	0.26525	0.4436	1	7614	2	0.88722	0.0017941	0.0078318	0.411064	344	3	0.88722		ICA1L	8	0.034395	0.12456	0.974719	1757	3	0.68244	0.0056961	0.031538	0.973885	344	4	0.68244
	TPM1	5	0.99649	0.99648	1	17757	0	1.2092	0.0018041	0.0078769	0.412229	345	5	1.2092		WASL	3	0.24624	0.37084	0.992996	7353	1	3.6476	0.0056962	0.015627	0.968017	345	2	3.6476
	SKOR1	5	0.99819	0.99817	1	17825	0	0.83995	0.0018114	0.0079076	0.412365	346	5	0.83995		RPSA	6	0.76324	0.84081	0.999665	14717	1	0.29054	0.0057132	0.026881	0.973885	346	3	0.29054
	IL27RA	5	0.18793	0.35694	1	6208	2	0.61141	0.0018147	0.0079252	0.412365	347	3	0.61141		C6orf226	3	0.99425	0.99435	0.999665	18856	0	1.9258	0.0057503	0.015768	0.968017	347	3	1.9258
	COQ7	5	0.98744	0.98751	1	17467	0	1.2537	0.0018235	0.0079703	0.413516	348	5	1.2537		IL17RC	4	0.54051	0.64391	0.999665	11411	1	2.4104	0.0057701	0.020034	0.968017	348	3	2.4104
	PHKA1	5	0.99814	0.99813	1	17822	0	1.2419	0.0018557	0.0081117	0.418169	349	5	1.2419		LMO1	6	0.53683	0.69971	0.999665	11367	1	2.3763	0.0057811	0.027171	0.973885	349	5	2.3763
	CHKB	5	0.95958	0.95976	1	16774	0	0.67326	0.0018562	0.008115	0.418169	350	4	0.67326		RAB23	6	0.87223	0.88828	0.999665	16556	1	1.5777	0.0058116	0.027314	0.973885	350	5	1.5777
	MSRB1	5	0.99814	0.99813	1	17821	0	1.0119	0.0018598	0.0081348	0.418169	351	5	1.0119		IGSF9	3	0.99419	0.99429	0.999665	18855	0	1.9639	0.005815	0.015945	0.968017	351	3	1.9639
	MATN3	5	0.99748	0.99747	1	17796	0	0.98844	0.0018655	0.0081529	0.418169	352	5	0.98844		C17orf50	3	0.70335	0.70545	0.999665	13695	1	-0.0021825	0.0058212	0.015962	0.968017	352	1	-0.0021825
	RAF1	5	0.038762	0.11281	0.884552	2242	4	-0.40614	0.0018821	0.0082277	0.420806	353	1	-0.40614		KLF10	6	0.96196	0.96213	0.999665	18213	0	1.8876	0.0058396	0.027405	0.973885	353	4	1.8876
	COMMD5	5	0.41804	0.57387	1	9839	1	0.91427	0.0018951	0.0082783	0.421071	354	3	0.91427		FAM184B	3	0.90135	0.90143	0.999665	17100	0	3.0893	0.0058416	0.016014	0.968017	354	3	3.0893
	RASL10A	5	0.22951	0.41375	1	7142	1	0.91809	0.001898	0.0082866	0.421071	355	4	0.91809		PON3	3	0.061239	0.13417	0.979332	2719	1	0.78099	0.0058637	0.016062	0.968017	355	2	0.78099
	KANSL3	5	0.99019	0.99026	1	17547	0	0.8037	0.0019011	0.0083031	0.421071	356	5	0.8037		MRPL15	3	0.99414	0.99425	0.999665	18854	0	2.5802	0.0058649	0.016066	0.968017	356	3	2.5802
	MAN1A1	4	0.99809	0.99812	1	17818	0	1.1209	0.0019122	0.0068644	0.401231	357	4	1.1209		FNDC9	3	0.76964	0.76986	0.999665	14820	0	1.8862	0.0059063	0.016167	0.968017	357	2	1.8862
	TMEM179	5	0.99802	0.99801	1	17817	0	0.90677	0.0019824	0.0086347	0.43312	358	5	0.90677		POLR2B	3	0.99408	0.99418	0.999665	18853	0	2.301	0.0059234	0.01622	0.968017	358	3	2.301
	KIAA1984	5	0.998	0.99799	1	17816	0	1.0084	0.0019991	0.0087062	0.435382	359	5	1.0084		CLDND2	3	0.99407	0.99417	0.999665	18852	0	1.6904	0.0059332	0.016251	0.968017	359	3	1.6904
	LIN52	5	0.52065	0.66466	1	11221	2	0.75768	0.0020267	0.0088244	0.439585	360	3	0.75768		FERMT1	3	0.86537	0.86539	0.999665	16443	0	2.5043	0.0059489	0.016288	0.968017	360	2	2.5043
	PCYT2	5	0.99796	0.99795	1	17815	0	0.68054	0.002036	0.0088635	0.439585	361	5	0.68054		C1orf122	3	0.99404	0.99415	0.999665	18851	0	2.3263	0.0059599	0.016317	0.968017	361	3	2.3263
	CDH13	5	0.2094	0.38794	1	6724	3	-0.21493	0.002036	0.0088635	0.439585	362	2	-0.21493		SLC11A2	12	0.99302	0.99361	0.999665	18833	1	1.0141	0.0059775	0.038506	0.976916	362	10	1.0141
	TAOK1	5	0.99794	0.99793	1	17814	0	0.81178	0.002057	0.0089388	0.442104	363	5	0.81178		MORC4	3	0.18468	0.29446	0.991358	5886	1	-0.01675	0.0059914	0.016406	0.968017	363	1	-0.01675
	GALNT9	5	0.36439	0.52737	1	9060	2	1.3247	0.0020769	0.0090175	0.443157	364	3	1.3247		TMEM184A	3	0.994	0.99411	0.999665	18849	0	2.3294	0.0059993	0.016427	0.968017	364	3	2.3294
	AFF4	5	0.1397	0.28491	0.997997	5090	1	1.2974	0.0020778	0.0090241	0.443157	365	4	1.2974		USP5	5	0.35184	0.5296	0.997083	9176	2	-0.12854	0.0060032	0.024795	0.973885	365	2	-0.12854
	MAML2	5	0.94181	0.94199	1	16427	0	1.4087	0.0020799	0.009034	0.443157	366	4	1.4087		FHL1	18	0.6376	0.88931	0.999665	12699	5	0.32183	0.0060236	0.044773	0.981752	366	9	0.32183
	PAGE1	5	0.80895	0.82118	1	14096	1	1.3858	0.0021037	0.009139	0.447092	367	4	1.3858		ODF3B	3	0.66133	0.66897	0.999665	13059	1	3.1456	0.0060333	0.016512	0.968017	367	2	3.1456
	KCNAB3	5	0.80654	0.8195	1	14061	1	0.88484	0.0021504	0.0093513	0.452944	368	4	0.88484		IRAK3	3	0.91125	0.91132	0.999665	17271	0	3.4506	0.0060556	0.016564	0.968017	368	3	3.4506
	C5orf66	5	0.14264	0.28942	1	5157	2	1.2047	0.0021556	0.0093717	0.452944	369	3	1.2047		ZNF682	6	0.99393	0.9939	0.999665	18848	0	0.57265	0.006066	0.028387	0.973885	369	6	0.57265
	HIC2	5	0.88743	0.88791	1	15377	0	0.92317	0.002158	0.0093837	0.452944	370	4	0.92317		KHSRP	3	0.99389	0.99401	0.999665	18847	0	2.3307	0.0061114	0.016711	0.968017	370	3	2.3307
	ARIH2	5	0.93347	0.93369	1	16257	0	0.80492	0.0021681	0.0094189	0.452944	371	4	0.80492		POLR2D	3	0.99389	0.99401	0.999665	18846	0	2.6337	0.0061143	0.016723	0.968017	371	3	2.6337
	ARSI	5	0.98767	0.98774	1	17476	0	0.79217	0.0021719	0.0094349	0.452944	372	5	0.79217		COG8	3	0.21532	0.33279	0.991358	6598	1	-0.27934	0.0061191	0.016734	0.968017	372	1	-0.27934
	LYG1	5	0.99783	0.99781	1	17810	0	0.98819	0.002174	0.0094464	0.452944	373	5	0.98819		MEN1	9	0.97787	0.97871	0.999665	18526	1	1.343	0.0061568	0.034588	0.973885	373	7	1.343
	ELF3	5	0.99782	0.9978	1	17809	0	1.0459	0.0021827	0.0094838	0.452944	374	5	1.0459		ABCA9	3	0.99383	0.99395	0.999665	18845	0	1.6998	0.0061702	0.016871	0.968017	374	3	1.6998
	RORA	5	0.37384	0.53557	1	9186	1	1.1904	0.0021833	0.009486	0.452944	375	4	1.1904		PFDN2	3	0.93526	0.93541	0.999665	17733	0	3.4053	0.006179	0.016892	0.968017	375	3	3.4053
	BMF	5	0.96991	0.97005	1	17021	0	1.3241	0.0021883	0.0095102	0.452944	376	4	1.3241		GLMN	3	0.74929	0.74949	0.999665	14493	0	1.4987	0.0062042	0.016961	0.968017	376	2	1.4987
	ABHD12	5	0.098302	0.22032	0.974871	4036	2	0.88531	0.0022141	0.0096224	0.457078	377	3	0.88531		C11orf80	3	0.56542	0.59617	0.999665	11726	1	3.4906	0.0062204	0.017007	0.968017	377	2	3.4906
	TTC36	5	0.98502	0.98515	1	17404	0	1.1243	0.0022346	0.0097165	0.460331	378	5	1.1243		DNAJB11	3	0.99377	0.99389	0.999665	18844	0	1.8668	0.0062322	0.017033	0.968017	378	3	1.8668
	MUC7	5	0.44642	0.59861	1	10228	1	0.26018	0.002275	0.0098798	0.466841	379	3	0.26018		GDNF-AS1	3	0.99374	0.99386	0.999665	18843	0	1.6757	0.0062626	0.017112	0.968017	379	3	1.6757
	PRDM15	5	0.99771	0.9977	1	17808	0	0.92284	0.0022866	0.009937	0.468314	380	5	0.92284		MYO1F	3	0.20495	0.31997	0.991358	6354	1	2.9381	0.0063074	0.017227	0.968017	380	2	2.9381
	CA8	5	0.99767	0.99765	1	17807	0	1.2667	0.002333	0.010125	0.471683	381	5	1.2667		APOL4	3	0.73483	0.73504	0.999665	14230	1	3.4302	0.0063112	0.017238	0.968017	381	2	3.4302
	CTIF	5	0.99765	0.99764	1	17806	0	0.99512	0.0023467	0.010186	0.471683	382	5	0.99512		MAPK10	9	0.39292	0.65548	0.999665	9681	2	1.4118	0.006318	0.035349	0.973885	382	7	1.4118
	RAB11FIP3	5	0.99765	0.99764	1	17805	0	0.63159	0.0023489	0.010197	0.471683	383	5	0.63159		PDIA6	9	0.27256	0.53029	0.997083	7940	3	0.26972	0.0063316	0.035408	0.973885	383	5	0.26972
	NNMT	5	0.99765	0.99763	1	17804	0	0.81515	0.0023547	0.010222	0.471683	384	5	0.81515		RARRES1	3	0.99364	0.99377	0.999665	18842	0	2.7993	0.0063633	0.017375	0.968017	384	3	2.7993
	SMARCA1	5	0.55124	0.69254	1	11659	1	1.3226	0.0023566	0.010229	0.471683	385	4	1.3226		TCP11	3	0.94915	0.94936	0.999665	17981	0	1.3875	0.0063744	0.017409	0.968017	385	3	1.3875
	BARHL1	5	0.97711	0.97727	1	17185	0	1.0636	0.0023654	0.010265	0.471683	386	5	1.0636		ISX	3	0.85257	0.85255	0.999665	16226	0	3.186	0.0063835	0.017436	0.968017	386	2	3.186
	DGCR8	5	0.99249	0.99256	1	17627	0	1.3877	0.002368	0.010276	0.471683	387	5	1.3877		SLC25A34	3	0.99362	0.99375	0.999665	18841	0	2.3674	0.0063839	0.017436	0.968017	387	3	2.3674
	PLEK2	5	0.9798	0.97997	1	17259	0	1.063	0.0023728	0.010297	0.471683	388	5	1.063		KSR2	3	0.64637	0.65694	0.999665	12837	1	3.0549	0.0064716	0.01765	0.968017	388	2	3.0549
	YBEY	4	0.99763	0.99764	1	17802	0	1.1341	0.0023748	0.0084824	0.428955	389	4	1.1341		NRIP1	3	0.99352	0.99365	0.999665	18839	0	1.9232	0.006477	0.017659	0.968017	389	3	1.9232
	PITRM1	4	0.64093	0.68053	1	12395	1	1.0972	0.0023988	0.0085693	0.432135	390	2	1.0972		HK1	9	0.74075	0.8781	0.999665	14341	1	1.4018	0.0064921	0.036178	0.973885	390	8	1.4018
	GRIN3B	5	0.9976	0.99758	1	17801	0	0.68331	0.0024039	0.010422	0.47526	391	5	0.68331		SLFN5	3	0.71126	0.71265	0.999665	13827	1	0.44598	0.006502	0.017718	0.968017	391	2	0.44598
	CHRM3	5	0.99759	0.99758	1	17800	0	1.2074	0.0024066	0.010428	0.47526	392	5	1.2074		CENPU	3	0.9935	0.99362	0.999665	18838	0	1.8102	0.0065038	0.017722	0.968017	392	3	1.8102
	SMS	5	0.98029	0.98044	1	17268	0	1.4957	0.0024434	0.010566	0.480361	393	5	1.4957		AVPR2	3	0.99348	0.99361	0.999665	18837	0	1.9197	0.0065216	0.017766	0.968017	393	3	1.9197
	RUSC2	5	0.88288	0.88334	1	15295	0	0.99376	0.0024681	0.010675	0.482947	394	3	0.99376		ELOVL1	6	0.51909	0.68781	0.999665	11169	2	1.9057	0.0065275	0.030399	0.973885	394	4	1.9057
	AGAP1	5	0.98388	0.984	1	17372	0	1.0724	0.0024688	0.010677	0.482947	395	5	1.0724		EIF2B3	3	0.29805	0.43404	0.995281	8534	1	1.9275	0.0065871	0.017943	0.968017	395	2	1.9275
	GSK3A	5	0.99752	0.99751	1	17798	0	1.0635	0.0024761	0.010709	0.483201	396	5	1.0635		IL20RB	3	0.99341	0.99354	0.999665	18836	0	1.8331	0.0065935	0.017959	0.968017	396	3	1.8331
	IFFO2	5	0.9975	0.9975	1	17797	0	0.61326	0.0024965	0.010791	0.483905	397	5	0.61326		FAM122C	7	0.29355	0.52113	0.997083	8436	3	1.1628	0.006618	0.033794	0.973885	397	4	1.1628
	MAPRE2	5	0.87836	0.8788	1	15202	0	0.32934	0.0024995	0.010805	0.483905	398	2	0.32934		OR13F1	3	0.95627	0.95656	0.999665	18119	0	1.1303	0.0066722	0.018174	0.968017	398	3	1.1303
	IFI27	5	0.54816	0.68968	1	11617	1	1.091	0.002518	0.010885	0.486266	399	4	1.091		DPY19L3	6	0.63652	0.76953	0.999665	12686	2	0.58398	0.0066897	0.031086	0.973885	399	4	0.58398
	TP63	5	0.76993	0.79587	1	13629	1	0.19001	0.0025556	0.011049	0.489034	400	3	0.19001		BCL2L1	3	0.26352	0.39204	0.994188	7756	1	2.9427	0.0066964	0.018227	0.968017	400	2	2.9427
	DNPEP	5	0.99744	0.99745	1	17793	0	0.84722	0.0025567	0.011052	0.489034	401	5	0.84722		HOXB7	3	0.45169	0.52231	0.997083	10355	1	-0.11855	0.0067147	0.018269	0.968017	401	1	-0.11855
	ALOXE3	5	0.99658	0.99656	1	17759	0	1.0138	0.0025632	0.01108	0.489034	402	5	1.0138		NAT14	3	0.28756	0.42122	0.994188	8291	2	-0.66183	0.0067573	0.018397	0.968017	402	1	-0.66183
	ARHGAP21	5	0.8978	0.89819	1	15558	0	0.99803	0.0025675	0.011096	0.489034	403	4	0.99803		GABPB2	3	0.99324	0.99339	0.999665	18835	0	1.7196	0.0067586	0.018398	0.968017	403	3	1.7196
	DCAF16	5	0.1658	0.3244	1	5709	1	1.1686	0.0025697	0.011108	0.489034	404	4	1.1686		FAM117A	3	0.87047	0.87055	0.999665	16536	0	3.0015	0.0067669	0.018425	0.968017	404	3	3.0015
	QRICH1	5	0.85339	0.85543	1	14764	1	1.2204	0.0025699	0.01111	0.489034	405	4	1.2204		RHBDF2	6	0.70397	0.82018	0.999665	13705	2	0.68917	0.0067747	0.031466	0.973885	405	3	0.68917
	NPC1	5	0.99563	0.99563	1	17732	0	1.0219	0.0025956	0.011215	0.492454	406	5	1.0219		PRPS1	3	0.8947	0.89478	0.999665	16970	0	1.3139	0.0067998	0.018521	0.968017	406	3	1.3139
	CHRNB2	5	0.99738	0.99739	1	17791	0	1.0151	0.0026209	0.011318	0.495772	407	5	1.0151		RBM7	3	0.62706	0.64172	0.999665	12543	1	0.9925	0.0068423	0.018629	0.968017	407	2	0.9925
	INSIG1	5	0.95303	0.95321	1	16638	0	1.4951	0.0026315	0.011366	0.496092	408	4	1.4951		SPDYC	3	0.93658	0.93674	0.999665	17750	0	2.3651	0.0068849	0.018742	0.968017	408	3	2.3651
	COL3A1	5	0.99736	0.99737	1	17790	0	0.81103	0.0026359	0.011381	0.496092	409	5	0.81103		IL11	3	0.9931	0.99324	0.999665	18834	0	2.7329	0.0069032	0.018797	0.968017	409	3	2.7329
	AK7	5	0.99736	0.99736	1	17789	0	0.56939	0.0026442	0.01141	0.496185	410	5	0.56939		EIF1AD	3	0.67843	0.68338	0.999665	13306	1	3.4271	0.0069566	0.018926	0.968017	410	2	3.4271
	CALD1	5	0.99733	0.99733	1	17788	0	1.1803	0.0026671	0.011515	0.499547	411	5	1.1803		TDRKH	3	0.93798	0.93818	0.999665	17774	0	1.4427	0.0069699	0.018965	0.968017	411	3	1.4427
	KIAA1522	4	0.99733	0.99736	1	17787	0	0.86202	0.0026676	0.0094646	0.452944	412	4	0.86202		CEACAM20	3	0.99301	0.99315	0.999665	18832	0	2.9979	0.0069872	0.019009	0.968017	412	3	2.9979
	SPEG	6	0.99181	0.99182	1	17599	0	0.89364	0.0026727	0.013226	0.521037	413	6	0.89364		EFR3A	3	0.29619	0.43175	0.994671	8497	1	3.0911	0.0069964	0.019033	0.968017	413	2	3.0911
	CHD6	5	0.99499	0.99502	1	17711	0	0.92763	0.0026958	0.011631	0.500342	414	5	0.92763		THAP8	3	0.41006	0.49787	0.997083	9877	1	3.0088	0.0070044	0.019052	0.968017	414	2	3.0088
	MORC2	5	0.73022	0.77338	1	13178	1	1.4027	0.0026987	0.011644	0.500342	415	4	1.4027		EEF2K	3	0.46368	0.5296	0.997083	10497	1	1.3486	0.0070125	0.019074	0.968017	415	2	1.3486
	SOX10	5	0.9973	0.9973	1	17786	0	0.98092	0.0027017	0.011653	0.500342	416	5	0.98092		ECI2	6	0.36303	0.5793	0.999665	9298	3	0.097008	0.0070296	0.032547	0.973885	416	3	0.097008
	NONO	5	0.98214	0.98227	1	17324	0	1.1208	0.0027047	0.011669	0.500342	417	5	1.1208		KCTD10	3	0.3889	0.48588	0.997083	9629	1	2.9249	0.0070364	0.019132	0.968017	417	2	2.9249
	KREMEN1	5	0.99729	0.9973	1	17785	0	0.69636	0.0027056	0.011673	0.500342	418	5	0.69636		ARL6IP6	3	0.28494	0.4181	0.994188	8225	1	2.8772	0.0070484	0.019164	0.968017	418	2	2.8772
	FAM110D	5	0.97718	0.97735	1	17186	0	0.63473	0.0027239	0.011744	0.501396	419	5	0.63473		CRB2	3	0.99294	0.99308	0.999665	18831	0	3.1542	0.0070577	0.019187	0.968017	419	3	3.1542
	HMOX2	5	0.96452	0.96471	1	16891	0	1.1404	0.002727	0.011753	0.501396	420	4	1.1404		PDE3B	3	0.51001	0.55879	0.997083	11041	1	-0.44499	0.0070975	0.019294	0.968017	420	1	-0.44499
	YWHAH	5	0.29825	0.47131	1	8083	1	0.67655	0.0027541	0.011868	0.504402	421	4	0.67655		NDUFA11	3	0.38328	0.48279	0.997083	9562	1	0.68004	0.00714	0.019402	0.968017	421	2	0.68004
	PCDHA6	5	0.99724	0.99725	1	17783	0	0.8705	0.0027571	0.011879	0.504402	422	5	0.8705		NM_031858	3	0.99285	0.99298	0.999665	18830	0	1.6822	0.0071477	0.019428	0.968017	422	3	1.6822
	MFF	5	0.99722	0.99723	1	17782	0	1.2074	0.0027763	0.011955	0.506191	423	5	1.2074		GTF3C6	3	0.83835	0.83832	0.999665	15979	0	3.4095	0.0071852	0.01954	0.968017	423	2	3.4095
	SOD3	5	0.91852	0.91882	1	15961	0	1.057	0.0027843	0.011988	0.506191	424	4	1.057		C17orf67	3	0.9928	0.99293	0.999665	18829	0	3.0317	0.0071954	0.019565	0.968017	424	3	3.0317
	FBLN5	5	0.99721	0.99722	1	17781	0	1.1281	0.00279	0.012006	0.506191	425	5	1.1281		TTPA	3	0.43926	0.51494	0.997083	10202	1	3.2292	0.0072095	0.019599	0.968017	425	2	3.2292
	NKRF	5	0.5722	0.70436	1	11892	1	1.6513	0.0028097	0.012094	0.508232	426	3	1.6513		MLNR	3	0.89532	0.8954	0.999665	16987	0	3.4094	0.0072257	0.019642	0.968017	426	3	3.4094
	C16orf58	5	0.99719	0.99719	1	17780	0	0.72045	0.0028135	0.012114	0.508232	427	5	0.72045		ONECUT2	3	0.62064	0.63672	0.999665	12450	1	0.0035872	0.0072676	0.019746	0.968017	427	1	0.0035872
	SPN	5	0.99718	0.99719	1	17779	0	0.89435	0.0028197	0.012139	0.508232	428	5	0.89435		SGMS2	6	0.96001	0.96017	0.999665	18180	0	1.0368	0.0072727	0.033563	0.973885	428	3	1.0368
	MXRA8	5	0.97073	0.97088	1	17039	0	0.58639	0.0028361	0.012206	0.509855	429	4	0.58639		LPAR5	6	0.63368	0.76745	0.999665	12643	1	2.1352	0.0072804	0.033605	0.973885	429	5	2.1352
	SEZ6L2	5	0.99715	0.99715	1	17778	0	0.82775	0.0028495	0.012264	0.511104	430	5	0.82775		NSUN5	3	0.95123	0.95148	0.999665	18027	0	2.3506	0.0072825	0.019783	0.968017	430	3	2.3506
	SLC25A51	4	0.99715	0.99717	1	17777	0	1.1098	0.0028544	0.010141	0.471683	431	4	1.1098		C17orf80	6	0.070355	0.18894	0.983159	2967	3	-0.12865	0.0072844	0.033619	0.973885	431	2	-0.12865
	MANBA	5	0.65994	0.73951	1	12540	1	0.94772	0.0028694	0.012351	0.51327	432	4	0.94772		NHLRC4	3	0.91553	0.91557	0.999665	17350	0	1.9364	0.0073101	0.019855	0.968017	432	3	1.9364
	TNFAIP1	5	0.84864	0.85142	1	14686	1	0.72537	0.0028797	0.012389	0.51327	433	4	0.72537		ASXL2	3	0.99267	0.99278	0.999665	18827	0	2.2045	0.0073316	0.019908	0.968017	433	3	2.2045
	HMGA1	5	0.92191	0.92222	1	16036	0	1.2226	0.0028833	0.012402	0.51327	434	4	1.2226		MSANTD1	3	0.68413	0.68828	0.999665	13389	1	3.5772	0.0073927	0.020056	0.968017	434	2	3.5772
	AMBN	4	0.54217	0.62554	1	11533	1	1.1254	0.0028873	0.01026	0.471683	435	3	1.1254		WFDC8	3	0.50036	0.55259	0.997083	10925	1	2.1738	0.0074377	0.020177	0.968017	435	2	2.1738
	SOX14	5	0.58574	0.7093	1	11982	1	0.03748	0.0028922	0.012435	0.513455	436	2	0.03748		XAF1	3	0.99256	0.99268	0.999665	18826	0	2.2542	0.0074385	0.020177	0.968017	436	3	2.2542
	SAP30L	7	0.99711	0.99708	1	17776	0	0.79207	0.0028944	0.015896	0.56406	437	7	0.79207		PSG11	2	0.65893	0.65857	0.999665	13022	0	3.5724	0.007492	0.014245	0.968017	437	1	3.5724
	GFER	5	0.40483	0.5625	1	9628	1	1.5671	0.0029106	0.012508	0.515293	438	4	1.5671		METTL16	3	0.071362	0.14763	0.983159	2982	1	3.1155	0.0075227	0.020401	0.968017	438	2	3.1155
	FAM122B	5	0.99708	0.99708	1	17775	0	0.65424	0.0029211	0.012545	0.515631	439	5	0.65424		ZBTB49	3	0.99247	0.99258	0.999665	18825	0	2.1549	0.0075334	0.02043	0.968017	439	3	2.1549
	APOBR	5	0.99703	0.99704	1	17773	0	0.60064	0.0029689	0.012734	0.521037	440	5	0.60064		CNTN4	9	0.66414	0.84088	0.999665	13100	2	1.0093	0.0075487	0.041261	0.976916	440	7	1.0093
	PTPRA	5	0.99689	0.99689	1	17768	0	0.9536	0.0029781	0.012769	0.521037	441	5	0.9536		RPL36AL	3	0.89865	0.89879	0.999665	17054	0	3	0.0075575	0.020492	0.968017	441	3	3
	HIRIP3	5	0.98427	0.98437	1	17386	0	0.74136	0.0029875	0.012802	0.521037	442	5	0.74136		YY1AP1	15	0.11034	0.34465	0.991358	4073	6	0.88061	0.0075594	0.050588	0.985559	442	9	0.88061
	HSPB1	5	0.76447	0.79261	1	13573	1	0.75568	0.0030044	0.012874	0.521037	443	4	0.75568		STXBP4	3	0.011938	0.031662	0.962523	660	1	0.44962	0.0075652	0.020509	0.968017	443	2	0.44962
	ACCS	5	0.99698	0.99699	1	17772	0	1.0502	0.0030179	0.012926	0.521037	444	5	1.0502		FAM9A	4	0.909	0.90877	0.999665	17236	0	2.98	0.0075653	0.025903	0.973885	444	3	2.98
	NANS	5	0.21858	0.40085	1	6929	3	-0.37225	0.0030402	0.013016	0.521037	445	2	-0.37225		BAIAP2L2	3	0.9721	0.97227	0.999665	18418	0	3.5755	0.0075741	0.020526	0.968017	445	3	3.5755
	CBL	5	0.99301	0.99306	1	17645	0	1.1709	0.0030465	0.013044	0.521037	446	5	1.1709		DPH3	3	0.99237	0.99248	0.999665	18824	0	2.3043	0.007634	0.020685	0.968017	446	3	2.3043
	SUN2	5	0.99695	0.99695	1	17771	0	0.69814	0.0030467	0.013045	0.521037	447	5	0.69814		STOM	2	0.99236	0.99221	0.999665	18823	0	3.4514	0.0076416	0.014528	0.968017	447	2	3.4514
	SLC25A47	5	0.91888	0.9192	1	15967	0	0.92504	0.0030505	0.013059	0.521037	448	4	0.92504		NAV1	6	0.97905	0.97896	0.999665	18557	0	1.856	0.0076481	0.035229	0.973885	448	5	1.856
	TAF4	5	0.99433	0.99436	1	17695	0	1.1566	0.003052	0.013064	0.521037	449	5	1.1566		KDM7A	3	0.51078	0.5593	0.997083	11056	1	0.52306	0.0076503	0.020723	0.968017	449	2	0.52306
	PPP1R11	5	0.7628	0.79165	1	13556	1	2.4653	0.0030595	0.013095	0.521037	450	4	2.4653		MARVELD1	3	0.99232	0.99243	0.999665	18822	0	3.4692	0.0076771	0.020801	0.969241	450	3	3.4692
	ARRDC5	5	0.54293	0.68491	1	11549	1	0.28891	0.0030605	0.013097	0.521037	451	4	0.28891		SLC34A3	6	0.71472	0.82537	0.999665	13892	1	2.2367	0.0077337	0.035575	0.973885	451	5	2.2367
	ZNF233	5	0.25943	0.43871	1	7546	1	1.3114	0.00307	0.013136	0.521037	452	4	1.3114		ACKR4	6	0.97599	0.97596	0.999665	18493	0	1.4098	0.0077381	0.035593	0.973885	452	5	1.4098
	TBC1D24	5	0.9784	0.97856	1	17221	0	0.7846	0.003082	0.013182	0.521037	453	5	0.7846		RUNX2	6	0.8277	0.86594	0.999665	15810	1	2.0541	0.0077623	0.0357	0.973885	453	5	2.0541
	KRTAP19-4	3	0.9568	0.9571	1	16710	0	1.441	0.0030858	0.0086369	0.43312	454	3	1.441		TCN1	3	0.99224	0.99235	0.999665	18821	0	2.7703	0.0077639	0.021023	0.973885	454	3	2.7703
	TRIP12	5	0.85039	0.85288	1	14717	1	1.7086	0.0030877	0.013209	0.521037	455	4	1.7086		DDT	6	0.99222	0.99221	0.999665	18820	0	1.0712	0.0077773	0.035772	0.973885	455	6	1.0712
	KIF26B	5	0.99691	0.99692	1	17770	0	0.62829	0.0030879	0.01321	0.521037	456	5	0.62829		UBE2J1	3	0.9922	0.99232	0.999665	18819	0	2.3752	0.0078025	0.021139	0.973885	456	3	2.3752
	MSTO1	5	0.99691	0.99692	1	17769	0	0.61771	0.0030906	0.013221	0.521037	457	5	0.61771		DUSP16	3	0.99218	0.99229	0.999665	18818	0	3.264	0.0078244	0.021199	0.973885	457	3	3.264
	ATP13A1	5	0.010007	0.03541	0.714085	889	2	-0.25053	0.0031165	0.013326	0.523812	458	2	-0.25053		UROS	2	0.99218	0.99202	0.999665	18817	0	3.3893	0.0078245	0.014874	0.968017	458	2	3.3893
	FBXL16	5	0.98777	0.98783	1	17478	0	1.1206	0.003154	0.013474	0.525882	459	5	1.1206		SLC22A5	3	0.99217	0.99229	0.999665	18816	0	2.2915	0.0078311	0.021215	0.973885	459	3	2.2915
	FLAD1	5	0.96866	0.96886	1	16996	0	1.0783	0.0031569	0.013493	0.525882	460	4	1.0783		ZNF211	3	0.99216	0.99227	0.999665	18815	0	1.8921	0.0078429	0.021248	0.973885	460	3	1.8921
	REEP1	11	0.80473	0.91961	1	14040	1	0.92059	0.0031574	0.021127	0.606851	461	8	0.92059		ZNF224	3	0.39246	0.48783	0.997083	9674	1	0.88533	0.0078628	0.021293	0.973885	461	2	0.88533
	HLA-G	5	0.99682	0.99682	1	17767	0	0.66472	0.0031766	0.013582	0.525882	462	5	0.66472		UPF2	6	0.6424	0.77375	0.999665	12783	1	0.073967	0.0078789	0.036205	0.973885	462	2	0.073967
	CCDC85C	5	0.99682	0.99682	1	17766	0	0.78154	0.00318	0.013594	0.525882	463	5	0.78154		GLRX2	7	0.59942	0.76564	0.999665	12148	1	1.6074	0.0078875	0.039734	0.976916	463	6	1.6074
	SMAD3	5	0.86676	0.86752	1	14986	1	1.2143	0.0031856	0.013616	0.525882	464	4	1.2143		BSG	6	0.99211	0.9921	0.999665	18814	0	0.89998	0.0078885	0.036247	0.973885	464	6	0.89998
	AMMECR1	5	0.99681	0.99682	1	17765	0	0.90221	0.0031879	0.013626	0.525882	465	5	0.90221		FCRL6	6	0.37336	0.59062	0.999665	9430	1	0.21698	0.0079393	0.036451	0.973885	465	3	0.21698
	TPM4	5	0.95811	0.9583	1	16739	0	1.1274	0.0032011	0.013675	0.525882	466	4	1.1274		LIF	3	0.065208	0.13941	0.983159	2830	1	2.7126	0.0079903	0.021631	0.973885	466	2	2.7126
	CRLF3	5	0.98216	0.98229	1	17326	0	1.4042	0.0032067	0.013699	0.525882	467	5	1.4042		TRPM6	9	0.14428	0.35827	0.992088	4928	3	0.62349	0.0079913	0.043294	0.981752	467	6	0.62349
	SIK2	5	0.99679	0.9968	1	17764	0	1.174	0.0032072	0.0137	0.525882	468	5	1.174		FBXO7	6	0.99201	0.99199	0.999665	18813	0	1.0819	0.0079949	0.036688	0.973885	468	6	1.0819
	CHID1	5	0.99678	0.99678	1	17763	0	0.47947	0.0032225	0.013768	0.52599	469	5	0.47947		CES5A	6	0.99199	0.99198	0.999665	18812	0	1.0321	0.0080101	0.036755	0.973885	469	6	1.0321
	ITGA9	5	0.95557	0.95579	1	16690	0	0.57231	0.0032287	0.01379	0.52599	470	4	0.57231		NSG1	6	0.92146	0.92246	0.999665	17455	1	1.4167	0.0080132	0.036768	0.973885	470	4	1.4167
	RUNDC3A	5	0.95726	0.95745	1	16722	0	1.1503	0.003238	0.013834	0.526521	471	4	1.1503		PCDHGA4	3	0.99198	0.99211	0.999665	18811	0	1.7869	0.0080197	0.021697	0.973885	471	3	1.7869
	CS	5	0.99006	0.99013	1	17539	0	1.4577	0.0032674	0.01395	0.528744	472	5	1.4577		STARD4	3	0.21219	0.32891	0.991358	6518	2	-0.47594	0.0080753	0.021847	0.973885	472	1	-0.47594
	PPP3CA	5	0.99006	0.99014	1	17540	0	1.2832	0.0032678	0.013951	0.528744	473	5	1.2832		RNF149	3	0.89325	0.89329	0.999665	16940	0	2.0514	0.0081178	0.021952	0.973885	473	3	2.0514
	CCDC182	5	0.99668	0.99667	1	17762	0	0.7099	0.0033231	0.014171	0.535974	474	5	0.7099		KLK12	3	0.11543	0.20562	0.986185	4222	1	2.375	0.0081265	0.021974	0.973885	474	2	2.375
	SEMA4F	5	0.9696	0.96974	1	17011	0	1.1111	0.003353	0.014278	0.538898	475	4	1.1111		SCARF1	3	0.99186	0.99198	0.999665	18810	0	3.256	0.0081418	0.022013	0.973885	475	3	3.256
	VBP1	5	0.039621	0.11497	0.887137	2280	3	-1.0047	0.0033969	0.014451	0.542007	476	1	-1.0047		TBCD	3	0.99185	0.99197	0.999665	18809	0	2.6389	0.0081522	0.022043	0.973885	476	3	2.6389
	TSPYL2	5	0.99659	0.99658	1	17761	0	0.77769	0.0034124	0.014512	0.542151	477	5	0.77769		TUBA3D	3	0.60429	0.62445	0.999665	12227	1	0.88024	0.0081603	0.022062	0.973885	477	2	0.88024
	KIF7	5	0.99659	0.99657	1	17760	0	0.67392	0.0034142	0.014518	0.542151	478	5	0.67392		GSG2	3	0.95506	0.95536	0.999665	18101	0	3.0284	0.0081953	0.022149	0.973885	478	3	3.0284
	APOC3	5	0.87362	0.87413	1	15115	1	0.79089	0.0034298	0.014574	0.542151	479	3	0.79089		P2RX6	4	0.16732	0.31277	0.991358	5485	1	0.37538	0.0082071	0.027917	0.973885	479	3	0.37538
	DDX39B	5	0.072442	0.17834	0.950781	3343	2	-0.043623	0.0035091	0.014898	0.551858	480	2	-0.043623		FAM187B	3	0.99179	0.99191	0.999665	18808	0	1.7997	0.0082129	0.022192	0.973885	480	3	1.7997
	TNFRSF25	5	0.97992	0.98008	1	17263	0	1.5029	0.0035257	0.014968	0.552596	481	5	1.5029		CITED1	9	0.037275	0.13492	0.979332	1878	3	0.64134	0.0082377	0.044433	0.981752	481	5	0.64134
	KIAA0196	5	0.9939	0.99392	1	17679	0	1.1543	0.0035384	0.015021	0.552596	482	5	1.1543		BEX1	3	0.71146	0.71284	0.999665	13834	1	1.623	0.0082453	0.02227	0.973885	482	2	1.623
	BTLA	5	0.34653	0.51216	1	8799	2	0.90861	0.003543	0.01504	0.552596	483	3	0.90861		CTTNBP2NL	3	0.99173	0.99186	0.999665	18806	0	1.6549	0.0082687	0.022342	0.973885	483	3	1.6549
	TAF1	5	0.74438	0.78105	1	13338	1	0.93849	0.0035651	0.015112	0.554082	484	3	0.93849		GGT1	6	0.99173	0.99175	0.999665	18805	0	1.1804	0.0082691	0.037822	0.976916	484	6	1.1804
	RAB40C	5	0.95882	0.959	1	16754	0	1.4605	0.0035879	0.015215	0.555508	485	4	1.4605		ORMDL1	3	0.99172	0.99184	0.999665	18804	0	1.8572	0.008281	0.022369	0.973885	485	3	1.8572
	C16orf96	5	0.17721	0.34123	1	5974	1	0.99257	0.0035884	0.015216	0.555508	486	4	0.99257		NAT2	3	0.42325	0.50554	0.997083	10022	1	2.335	0.0082878	0.022389	0.973885	486	2	2.335
	MRAP2	5	0.97485	0.97502	1	17128	0	0.98448	0.0035957	0.015243	0.555508	487	5	0.98448		HMOX2	11	0.085229	0.26497	0.989799	3369	5	0.90657	0.0083003	0.049288	0.985559	487	6	0.90657
	DHRS11	5	0.17452	0.33732	1	5916	2	-0.17447	0.0036084	0.015291	0.556146	488	2	-0.17447		TRIM64	3	0.9917	0.99183	0.999665	18803	0	1.2549	0.008302	0.02242	0.973885	488	3	1.2549
	EXOC2	5	0.022246	0.069664	0.815981	1521	4	-0.57339	0.0036212	0.015335	0.556418	489	1	-0.57339		SPX	3	0.99167	0.99179	0.999665	18802	0	1.7655	0.0083335	0.022512	0.973885	489	3	1.7655
	MOB1A	5	0.90789	0.90825	1	15750	0	1.4069	0.003629	0.015361	0.556418	490	4	1.4069		AGAP5	3	0.85036	0.85035	0.999665	16181	0	1.1637	0.0083728	0.022603	0.973885	490	2	1.1637
	LIMK1	5	0.99636	0.99634	1	17756	0	0.69338	0.0036424	0.015418	0.556446	491	5	0.69338		CRLS1	6	0.99159	0.99159	0.999665	18801	0	1.0804	0.0084148	0.038425	0.976916	491	6	1.0804
	AMMECR1L	5	0.99635	0.99633	1	17755	0	0.57696	0.0036506	0.015451	0.556446	492	5	0.57696		ZMYND11	10	0.12818	0.34355	0.991358	4546	4	1.0489	0.0084176	0.048076	0.985559	492	6	1.0489
	THBS2	5	0.99635	0.99633	1	17754	0	0.59752	0.0036519	0.015454	0.556446	493	5	0.59752		ILDR2	2	0.99156	0.99139	0.999665	18800	0	3.0836	0.0084357	0.016029	0.968017	493	2	3.0836
	HIST2H2AA3	4	0.98523	0.98529	1	17412	0	0.49326	0.0036608	0.01291	0.521037	494	4	0.49326		SOWAHD	3	0.45043	0.52154	0.997083	10340	1	2.9648	0.0084381	0.022772	0.973885	494	2	2.9648
	DGKZ	5	0.9795	0.97965	1	17252	0	0.81867	0.003691	0.015611	0.560967	495	5	0.81867		IVNS1ABP	3	0.73444	0.73466	0.999665	14226	1	0.25372	0.0084577	0.022826	0.973885	495	2	0.25372
	LUZP1	5	0.9954	0.99542	1	17728	0	1.0595	0.0037132	0.015703	0.56224	496	5	1.0595		WNT5B	6	0.77305	0.84421	0.999665	14876	1	1.9348	0.0084853	0.038725	0.976916	496	4	1.9348
	ZBTB26	5	0.48237	0.63039	1	10728	2	0.48854	0.003716	0.015709	0.56224	497	3	0.48854		ESCO2	3	0.94295	0.94314	0.999665	17866	0	2.7594	0.0084862	0.022895	0.973885	497	3	2.7594
	ASB2	5	0.018721	0.060085	0.788131	1354	1	0.8284	0.0037433	0.015818	0.56406	498	4	0.8284		UHRF1BP1L	3	0.93675	0.93692	0.999665	17755	0	3.6916	0.0085081	0.022951	0.973885	498	3	3.6916
	AMER2	5	0.82855	0.83543	1	14379	1	1.1437	0.003747	0.015832	0.56406	499	4	1.1437		MYEOV2	3	0.99147	0.99159	0.999665	18799	0	2.6902	0.0085336	0.023013	0.973885	499	3	2.6902
	PTPN14	5	0.99427	0.9943	1	17691	0	0.85842	0.0037687	0.015912	0.56406	500	5	0.85842		RFTN2	3	0.99146	0.99158	0.999665	18798	0	2.3831	0.0085407	0.023027	0.973885	500	3	2.3831
	ZNF664	5	0.61706	0.72157	1	12213	1	1.2044	0.0037829	0.015967	0.56406	501	3	1.2044		TRMT11	3	0.99145	0.99157	0.999665	18797	0	1.6532	0.0085532	0.023066	0.973885	501	3	1.6532
	ZNF649	5	0.20464	0.3811	1	6610	3	-0.26641	0.0037894	0.015998	0.56406	502	2	-0.26641		TMEM70	3	0.36512	0.4727	0.997083	9331	1	2.9432	0.0085652	0.0231	0.973885	502	2	2.9432
	BEST2	5	0.99619	0.99617	1	17752	0	0.65903	0.0038123	0.016091	0.56406	503	5	0.65903		COPA	3	0.8264	0.82633	0.999665	15790	0	2.8359	0.008574	0.023117	0.973885	503	2	2.8359
	CCDC149	5	0.8671	0.86781	1	14994	1	1.2794	0.0038183	0.016112	0.56406	504	4	1.2794		MFSD1	3	0.71334	0.71457	0.999665	13863	1	2.5552	0.0085852	0.023143	0.973885	504	2	2.5552
	CRTC2	5	0.8203	0.82935	1	14262	1	1.1998	0.00382	0.016118	0.56406	505	4	1.1998		UBP1	3	0.99141	0.99152	0.999665	18796	0	1.7132	0.0085872	0.023147	0.973885	505	3	1.7132
	GOLGB1	5	0.74666	0.78238	1	13359	1	0.96485	0.0038201	0.016119	0.56406	506	4	0.96485		KRT36	3	0.90146	0.90154	0.999665	17103	0	2.9852	0.0086578	0.023326	0.973885	506	3	2.9852
	KBTBD7	5	0.69265	0.75454	1	12823	1	1.2159	0.0038397	0.016204	0.56406	507	3	1.2159		ZNF554	3	0.66062	0.66838	0.999665	13048	1	0.17179	0.0086702	0.02336	0.973885	507	1	0.17179
	NRK	5	0.42298	0.57817	1	9905	2	1.1627	0.0038414	0.016212	0.56406	508	3	1.1627		BCL3	3	0.21932	0.33766	0.991358	6698	2	-1.38	0.0087126	0.023465	0.973885	508	1	-1.38
	SERPINA4	5	0.99615	0.99614	1	17751	0	0.55922	0.0038451	0.016223	0.56406	509	5	0.55922		FYCO1	3	0.99125	0.99134	0.999665	18795	0	2.4049	0.008755	0.023554	0.973885	509	3	2.4049
	RAD21	5	0.78602	0.8059	1	13811	1	0.64865	0.0038454	0.016224	0.56406	510	4	0.64865		GPR37	3	0.74156	0.7417	0.999665	14358	1	3.1677	0.008782	0.023633	0.973885	510	2	3.1677
	ZNF689	5	0.91692	0.91722	1	15932	0	1.1502	0.0038463	0.01623	0.56406	511	3	1.1502		PGRMC1	3	0.71128	0.71266	0.999665	13829	1	3.3121	0.008791	0.023651	0.973885	511	2	3.3121
	EIF2AK2	4	0.62373	0.67031	1	12276	1	1.1728	0.0038669	0.013599	0.525882	512	3	1.1728		RBM12B	3	0.90589	0.90598	0.999665	17173	0	0.83212	0.0087976	0.023668	0.973885	512	3	0.83212
	KRT8	4	0.78952	0.79022	1	13863	1	1.6133	0.003892	0.013674	0.525882	513	3	1.6133		BBIP1	6	0.14159	0.3215	0.991358	4874	3	0.66562	0.0088776	0.040352	0.976916	513	3	0.66562
	CAB39	5	0.048535	0.137	0.918866	2633	2	0.69888	0.0039015	0.016459	0.570938	514	3	0.69888		MROH7	3	0.9506	0.95081	0.999665	18013	0	3.2982	0.0088802	0.02388	0.973885	514	3	3.2982
	SUMF1	5	0.94455	0.94474	1	16476	0	0.083779	0.0039575	0.016664	0.575384	515	2	0.083779		ZNF679	3	0.4556	0.5247	0.997083	10398	1	-0.013188	0.008925	0.023998	0.973885	515	1	-0.013188
	RNF168	5	0.98784	0.98791	1	17481	0	1.0713	0.0039614	0.016678	0.575384	516	5	1.0713		FSD1	3	0.96903	0.96923	0.999665	18364	0	3.0101	0.008925	0.023998	0.973885	516	3	3.0101
	BCL2L12	5	0.93186	0.93211	1	16218	0	0.94905	0.0039655	0.016695	0.575384	517	4	0.94905		CD68	3	0.95641	0.95669	0.999665	18121	0	2.5046	0.0089295	0.024007	0.973885	517	3	2.5046
	TP53I3	5	0.99603	0.99602	1	17749	0	0.77868	0.0039709	0.016715	0.575384	518	5	0.77868		ATP5G3	6	0.12114	0.2882	0.991358	4351	4	-0.55359	0.0089638	0.040715	0.976916	518	2	-0.55359
	PDIK1L	5	0.96845	0.96864	1	16988	0	1.1796	0.0039897	0.016797	0.577047	519	4	1.1796		ANKRD44	3	0.99102	0.99113	0.999665	18794	0	1.8329	0.008982	0.024153	0.973885	519	3	1.8329
	GOT1	5	0.98823	0.98829	1	17492	0	1.1033	0.0040029	0.016845	0.577047	520	5	1.1033		CLCF1	6	0.55978	0.71527	0.999665	11658	2	0.42367	0.008982	0.040787	0.976916	520	3	0.42367
	SEPT2	5	0.99599	0.99599	1	17747	0	1.0718	0.0040082	0.016869	0.577047	521	5	1.0718		TBCCD1	6	0.991	0.99101	0.999665	18793	0	1.3737	0.0089986	0.040859	0.976916	521	6	1.3737
	ATP7A	5	0.92235	0.92264	1	16046	0	1.436	0.0040136	0.016892	0.577047	522	4	1.436		GPR17	3	0.991	0.99112	0.999665	18792	0	1.9249	0.0090041	0.024213	0.973885	522	3	1.9249
	STX16	5	0.99596	0.99596	1	17746	0	0.69482	0.0040416	0.017002	0.579724	523	5	0.69482		UGP2	6	0.99099	0.99101	0.999665	18791	0	1.4725	0.0090053	0.040887	0.976916	523	6	1.4725
	KLHL12	5	0.98157	0.9817	1	17308	0	1.0149	0.0040546	0.01706	0.580345	524	5	1.0149		MASP2	3	0.99099	0.99111	0.999665	18790	0	2.6746	0.0090115	0.02423	0.973885	524	3	2.6746
	TRIM35	5	0.99594	0.99594	1	17745	0	0.96427	0.0040642	0.017097	0.580345	525	5	0.96427		MT1A	3	0.99094	0.99106	0.999665	18789	0	3.1276	0.0090616	0.024364	0.973885	525	3	3.1276
	IL6	5	0.018894	0.060544	0.788988	1363	3	-0.84318	0.0040696	0.017117	0.580345	526	2	-0.84318		OPRL1	6	0.29045	0.49783	0.997083	8362	1	0.46617	0.0090668	0.041126	0.976916	526	3	0.46617
	TMEM99	5	0.99592	0.99592	1	17743	0	0.78905	0.0040849	0.017174	0.58062	527	5	0.78905		GYPC	3	0.70215	0.70437	0.999665	13680	1	2.6969	0.0090827	0.024416	0.973885	527	2	2.6969
	SFTPC	5	0.99591	0.99592	1	17742	0	0.63056	0.0040883	0.01719	0.58062	528	5	0.63056		EPS8L2	3	0.99092	0.99104	0.999665	18788	0	2.77	0.0090839	0.024418	0.973885	528	3	2.77
	PDZK1	6	0.86661	0.87715	1	14985	1	0.48027	0.0040978	0.019771	0.60246	529	3	0.48027		ASRGL1	3	0.22769	0.34796	0.991358	6899	1	3.0529	0.0090872	0.024426	0.973885	529	2	3.0529
	PDS5A	4	0.93033	0.93003	1	16193	0	1.6531	0.0040996	0.014376	0.541437	530	2	1.6531		MSMB	3	0.94255	0.94269	0.999665	17856	0	1.1456	0.0090949	0.024448	0.973885	530	3	1.1456
	COX7B	4	0.11475	0.241	0.989933	4455	3	-0.56387	0.0041092	0.014407	0.541464	531	1	-0.56387		FAM218A	3	0.96739	0.96756	0.999665	18336	0	3.0435	0.0091008	0.024463	0.973885	531	3	3.0435
	TSPO	5	0.0051404	0.021098	0.617604	611	3	-0.60288	0.0041256	0.017341	0.581021	532	2	-0.60288		EPHA5	3	0.9836	0.98375	0.999665	18647	0	2.404	0.0091144	0.0245	0.973885	532	3	2.404
	ARGFX	5	0.96646	0.96668	1	16948	0	1.0244	0.0041295	0.017355	0.581021	533	4	1.0244		ZMAT3	3	0.55393	0.58819	0.999665	11574	1	3.2721	0.0091325	0.024551	0.973885	533	2	3.2721
	TMEM260	5	0.54072	0.68292	1	11509	2	0.99967	0.0041306	0.017358	0.581021	534	3	0.99967		MMP10	3	0.49151	0.54695	0.997083	10819	1	1.4347	0.0091374	0.024563	0.973885	534	2	1.4347
	NLE1	7	0.51164	0.7015	1	11116	1	1.0826	0.0041367	0.021995	0.6208	535	6	1.0826		CRAT	3	0.061403	0.13439	0.979332	2722	1	1.0581	0.0092223	0.024791	0.973885	535	2	1.0581
	IDI1	4	0.67477	0.70182	1	12678	1	1.0615	0.0041574	0.014575	0.542151	536	3	1.0615		LRRC66	3	0.11267	0.20207	0.986185	4140	2	-1.2922	0.0092648	0.024908	0.973885	536	1	-1.2922
	SCAMP5	5	0.99584	0.99584	1	17741	0	0.74603	0.0041607	0.017494	0.582411	537	5	0.74603		TUB	6	0.83615	0.86981	0.999665	15948	1	1.5396	0.0092697	0.041987	0.981752	537	5	1.5396
	PTK2B	5	0.84417	0.84769	1	14612	1	1.0604	0.0041623	0.017502	0.582411	538	4	1.0604		HNRNPC	3	0.99072	0.99084	0.999665	18787	0	2.1183	0.0092825	0.024955	0.973885	538	3	2.1183
	TTC32	4	0.99583	0.9959	1	17740	0	1.0777	0.0041692	0.014608	0.542258	539	4	1.0777		XPNPEP1	3	0.71914	0.71998	0.999665	13967	1	2.8747	0.0094112	0.025273	0.973885	539	2	2.8747
	WBP1	5	0.99581	0.99581	1	17739	0	0.79596	0.0041852	0.017594	0.582975	540	5	0.79596		LMX1A	6	0.98854	0.98855	0.999665	18739	0	1.6008	0.0094265	0.042621	0.981752	540	6	1.6008
	APOA1BP	5	0.93344	0.93366	1	16256	0	0.77088	0.00419	0.017616	0.582975	541	4	0.77088		TCEB3CL	3	0.99056	0.99068	0.999665	18786	0	1.2884	0.0094362	0.025328	0.973885	541	3	1.2884
	DPYSL5	5	0.99581	0.9958	1	17738	0	0.74891	0.0041944	0.017639	0.582975	542	5	0.74891		NKAIN2	3	0.90923	0.90931	0.999665	17237	0	3.6314	0.0094435	0.025346	0.973885	542	3	3.6314
	BRWD3	5	0.44621	0.59843	1	10223	1	0.86605	0.0042105	0.017705	0.582975	543	4	0.86605		EXOSC3	3	0.78632	0.7864	0.999665	15110	0	1.062	0.0094771	0.025432	0.973885	543	2	1.062
	TMEM208	5	0.9956	0.99561	1	17730	0	1.479	0.0042146	0.017726	0.582975	544	5	1.479		ACSL5	9	0.97516	0.97674	0.999665	18477	1	1.088	0.0095093	0.050339	0.985559	544	6	1.088
	TOM1	5	0.98906	0.98915	1	17513	0	0.88757	0.0042176	0.01774	0.582975	545	5	0.88757		NAPA	3	0.88959	0.88962	0.999665	16868	0	2.8558	0.0095127	0.025523	0.973885	545	3	2.8558
	PYGO2	5	0.99578	0.99578	1	17737	0	0.5123	0.0042191	0.017745	0.582975	546	5	0.5123		MCC	6	0.36819	0.58492	0.999665	9370	1	1.4497	0.0095346	0.043056	0.981752	546	5	1.4497
	PEX2	5	0.99308	0.99312	1	17650	0	1.9063	0.004232	0.017799	0.583662	547	5	1.9063		PBX4	3	0.88437	0.88444	0.999665	16780	0	3.3653	0.009559	0.025636	0.973885	547	3	3.3653
	METTL5	5	0.6234	0.72405	1	12272	1	1.2246	0.0042485	0.017863	0.584689	548	4	1.2246		ERMAP	6	0.27823	0.48393	0.997083	8065	3	0.64144	0.009588	0.043272	0.981752	548	3	0.64144
	PRSS8	5	0.85807	0.85949	1	14837	1	0.90852	0.0042744	0.017971	0.584854	549	4	0.90852		OSCAR	3	0.10687	0.19446	0.985108	3993	2	-0.94854	0.0096045	0.025754	0.973885	549	1	-0.94854
	HIST1H1A	5	0.99572	0.99572	1	17735	0	0.58547	0.0042839	0.01801	0.584854	550	5	0.58547		AKTIP	3	0.99038	0.9905	0.999665	18784	0	1.9726	0.0096167	0.025783	0.973885	550	3	1.9726
	C10orf11	4	0.37463	0.51818	1	9200	1	-0.22921	0.0042886	0.015016	0.552596	551	1	-0.22921		OS9	3	0.99037	0.99049	0.999665	18783	0	2.216	0.0096302	0.025824	0.973885	551	3	2.216
	MINA	5	0.9957	0.9957	1	17734	0	0.88499	0.0043048	0.018084	0.584854	552	5	0.88499		NXPE4	3	0.9802	0.98031	0.999665	18585	0	2.0289	0.0096894	0.025974	0.973885	552	3	2.0289
	PIWIL3	5	0.99203	0.9921	1	17608	0	1.4033	0.0043113	0.018111	0.584854	553	5	1.4033		ADAMTS15	3	0.99031	0.99044	0.999665	18782	0	1.4702	0.0096923	0.025985	0.973885	553	3	1.4702
	NRP1	5	0.98277	0.98287	1	17338	0	1.0172	0.0043265	0.018157	0.584854	554	5	1.0172		SSH3	3	0.94302	0.94321	0.999665	17868	0	2.89	0.0096986	0.025998	0.973885	554	3	2.89
	ASCC2	5	0.97931	0.97946	1	17245	0	0.75034	0.0043297	0.018174	0.584854	555	5	0.75034		CATSPERG	3	0.97897	0.97912	0.999665	18555	0	2.7579	0.0097033	0.026013	0.973885	555	3	2.7579
	GGT5	5	0.99566	0.99566	1	17733	0	1.2266	0.0043372	0.018205	0.584854	556	5	1.2266		C9orf131	9	0.66074	0.83869	0.999665	13050	2	0.50632	0.0097169	0.051312	0.985559	556	6	0.50632
	PI4K2B	5	0.70286	0.75951	1	12912	1	1.0353	0.0043486	0.018243	0.584854	557	4	1.0353		STAT5B	3	0.99028	0.99041	0.999665	18781	0	2.1506	0.0097234	0.026068	0.973885	557	3	2.1506
	ENTPD3	5	0.3412	0.50762	1	8730	1	0.15932	0.0043525	0.018257	0.584854	558	3	0.15932		RPL9	6	0.49011	0.66881	0.999665	10803	1	2.4419	0.0097248	0.043868	0.981752	558	5	2.4419
	KRT9	5	0.89428	0.89475	1	15501	0	1.0359	0.0043629	0.018306	0.585381	559	3	1.0359		QPCT	3	0.86051	0.86051	0.999665	16356	0	1.1316	0.0097318	0.026092	0.973885	559	2	1.1316
	FAM211B	5	0.99561	0.99561	1	17731	0	0.4702	0.0043896	0.018417	0.587041	560	5	0.4702		SF3B4	3	0.9902	0.99032	0.999665	18780	0	2.4545	0.0097995	0.02628	0.973885	560	3	2.4545
	HTR1B	5	0.41196	0.56865	1	9748	1	0.75258	0.0043907	0.018423	0.587041	561	4	0.75258		ENTPD6	3	0.95145	0.95171	0.999665	18031	0	3.109	0.009825	0.026333	0.973885	561	3	3.109
	TMEM204	5	0.98555	0.98566	1	17419	0	0.73258	0.0044183	0.018518	0.588995	562	5	0.73258		ADGB	3	0.99017	0.9903	0.999665	18779	0	1.7529	0.0098269	0.02634	0.973885	562	3	1.7529
	RIN3	5	0.86656	0.86733	1	14984	1	0.5672	0.0044618	0.018689	0.59236	563	4	0.5672		PPP1CA	3	0.99015	0.99028	0.999665	18778	0	2.0074	0.0098504	0.0264	0.973885	563	3	2.0074
	UBE2QL1	5	0.99553	0.99555	1	17729	0	0.64835	0.0044699	0.018727	0.592519	564	5	0.64835		EIF4G1	10	0.94576	0.97048	0.999665	17912	1	1.1341	0.0098528	0.055087	0.985559	564	8	1.1341
	CDKN2A	9	0.31513	0.57026	1	8333	3	0.71114	0.0044959	0.025723	0.643667	565	6	0.71114		SRRM5	3	0.1078	0.1957	0.986185	4019	1	2.5397	0.0098592	0.026416	0.973885	565	2	2.5397
	ZHX2	5	0.96149	0.96167	1	16832	0	0.74286	0.0044985	0.018852	0.595334	566	4	0.74286		PLCXD2	3	0.97327	0.97341	0.999665	18441	0	3.0524	0.0098956	0.026511	0.973885	566	3	3.0524
	CUL5	5	0.71675	0.76644	1	13048	1	0.93694	0.0045753	0.019152	0.599647	567	4	0.93694		AKAP10	3	0.77634	0.77647	0.999665	14930	0	0.045244	0.0099016	0.026526	0.973885	567	1	0.045244
	C11orf35	5	0.99539	0.99542	1	17727	0	0.37582	0.0046088	0.019307	0.60246	568	5	0.37582		MAP2K3	6	0.48067	0.66276	0.999665	10689	2	-0.023188	0.0099146	0.04468	0.981752	568	2	-0.023188
	CHST7	5	0.99538	0.9954	1	17726	0	0.73135	0.0046224	0.01937	0.60246	569	5	0.73135		PRMT7	6	0.99006	0.99007	0.999665	18776	0	1.6427	0.0099374	0.044759	0.981752	569	6	1.6427
	ATP8B3	5	0.99537	0.9954	1	17725	0	0.52919	0.0046255	0.01938	0.60246	570	5	0.52919		ANP32A	3	0.99005	0.99018	0.999665	18775	0	1.7048	0.009947	0.026638	0.973885	570	3	1.7048
	MFN2	5	0.083087	0.19572	0.964209	3617	1	0.074195	0.0046299	0.019395	0.60246	571	2	0.074195		NIPAL2	3	0.99003	0.99016	0.999665	18773	0	2.4228	0.0099687	0.026693	0.973885	571	3	2.4228
	ZNF770	5	0.99535	0.99537	1	17723	0	0.78148	0.0046469	0.019466	0.60246	572	5	0.78148		EHF	6	0.090358	0.2292	0.988233	3523	1	1.5975	0.0099768	0.0449	0.981752	572	5	1.5975
	C12orf57	5	0.19774	0.37109	1	6438	1	1.3011	0.0046527	0.019492	0.60246	573	3	1.3011		TMEM104	3	0.86029	0.8603	0.999665	16352	0	1.3975	0.0099865	0.026734	0.973885	573	2	1.3975
	MYBPH	5	0.92487	0.92517	1	16090	0	1.0996	0.0046564	0.019507	0.60246	574	4	1.0996		PPP2R2B	10	0.88891	0.94784	0.999665	16853	1	1.1828	0.0099866	0.055739	0.985559	574	9	1.1828
	GKAP1	5	0.66506	0.74176	1	12586	1	1.3156	0.0046859	0.019628	0.60246	575	3	1.3156		PTS	3	0.36874	0.47466	0.997083	9375	1	2.8404	0.010009	0.026796	0.973885	575	2	2.8404
	NEFH	5	0.84426	0.84776	1	14613	1	1.0738	0.0047406	0.019839	0.60246	576	4	1.0738		RANBP3	3	0.64455	0.65551	0.999665	12810	1	0.74737	0.010071	0.026959	0.973885	576	2	0.74737
	GCLM	5	0.99526	0.99526	1	17721	0	1.619	0.0047441	0.019852	0.60246	577	5	1.619		CMTM1	6	0.95374	0.95389	0.999665	18075	0	0.95761	0.010084	0.045347	0.981752	577	5	0.95761
	HIVEP2	5	0.79848	0.81399	1	13967	1	1.1102	0.0047462	0.019859	0.60246	578	4	1.1102		LRRC63	3	0.9899	0.99004	0.999665	18772	0	1.9725	0.010096	0.027027	0.973885	578	3	1.9725
	RAB36	5	0.21493	0.39572	1	6855	1	0.95464	0.0047533	0.019887	0.60246	579	4	0.95464		VTI1A	3	0.52932	0.57156	0.998929	11285	1	2.0504	0.010114	0.027061	0.973885	579	2	2.0504
	ACTR5	5	0.99523	0.99524	1	17720	0	1.1704	0.0047721	0.019962	0.60246	580	5	1.1704		GRPEL2	3	0.98988	0.99001	0.999665	18771	0	1.6442	0.010118	0.027077	0.973885	580	3	1.6442
	HS3ST4	5	0.99519	0.9952	1	17719	0	0.99561	0.0047723	0.019966	0.60246	581	5	0.99561		C2orf54	6	0.44765	0.64165	0.999665	10303	2	0.95252	0.010149	0.045627	0.985559	581	3	0.95252
	HNRNPLL	5	0.98478	0.98491	1	17398	0	1.926	0.0047859	0.020021	0.60246	582	5	1.926		COL21A1	3	0.87943	0.87949	0.999665	16681	0	2.9855	0.010152	0.027168	0.973885	582	3	2.9855
	NEK11	5	0.20843	0.38654	1	6697	1	0.91767	0.0047916	0.020041	0.60246	583	4	0.91767		ATG9B	3	0.67488	0.68031	0.999665	13246	1	0.83132	0.010156	0.027177	0.973885	583	2	0.83132
	GAA	5	0.18072	0.34638	1	6042	2	0.10092	0.0047979	0.020066	0.60246	584	2	0.10092		KIF7	3	0.88335	0.8834	0.999665	16758	0	2.6511	0.010161	0.027191	0.973885	584	3	2.6511
	KIAA1671	5	0.51668	0.66104	1	11177	1	0.84419	0.0048182	0.020142	0.60246	585	4	0.84419		MYEF2	3	0.97817	0.97831	0.999665	18535	0	3.2814	0.010185	0.027252	0.973885	585	3	3.2814
	SF3A2	5	0.99518	0.99519	1	17718	0	0.90873	0.0048184	0.020143	0.60246	586	5	0.90873		KLK10	9	0.95691	0.96679	0.999665	18135	1	1.0915	0.010212	0.053586	0.985559	586	7	1.0915
	PDXP	5	0.32424	0.49314	1	8479	1	1.0934	0.0048353	0.020219	0.60246	587	4	1.0934		TRIAP1	3	0.12922	0.22345	0.988233	4568	2	-1.1413	0.010241	0.027393	0.973885	587	1	-1.1413
	TNK2	5	0.95781	0.95799	1	16732	0	0.62357	0.0048539	0.020297	0.60246	588	3	0.62357		NRXN1	6	0.87951	0.8925	0.999665	16683	1	1.3017	0.010254	0.046049	0.985559	588	4	1.3017
	ABLIM3	5	0.90817	0.90854	1	15754	0	0.83903	0.0048554	0.020303	0.60246	589	4	0.83903		HIPK2	3	0.91012	0.91022	0.999665	17251	0	3.2263	0.010271	0.027466	0.973885	589	3	3.2263
	ZNF410	5	0.10233	0.22676	0.981392	4130	2	1.2603	0.0048563	0.020304	0.60246	590	3	1.2603		GPRC5B	3	0.61968	0.63598	0.999665	12439	1	0.46344	0.010284	0.027505	0.973885	590	2	0.46344
	KLHL29	5	0.9926	0.99267	1	17629	0	0.85352	0.0048639	0.020337	0.60246	591	5	0.85352		TTBK1	3	0.88255	0.8826	0.999665	16740	0	3.195	0.010315	0.027582	0.973885	591	3	3.195
	CRADD	5	0.17093	0.33202	1	5827	2	0.20068	0.0048649	0.020342	0.60246	592	3	0.20068		CSGALNACT2	3	0.1957	0.30833	0.991358	6154	2	-0.71166	0.010326	0.02761	0.973885	592	1	-0.71166
	GYPC	8	0.849	0.9096	1	14692	1	0.84555	0.0048716	0.026286	0.644751	593	6	0.84555		ZNF675	3	0.98964	0.98977	0.999665	18770	0	3.2205	0.010362	0.027715	0.973885	593	3	3.2205
	CCDC157	5	0.99513	0.99514	1	17716	0	0.82501	0.0048722	0.020368	0.60246	594	5	0.82501		DYNLRB1	3	0.90598	0.90607	0.999665	17174	0	1.0838	0.010368	0.027733	0.973885	594	3	1.0838
	TMPRSS4	5	0.35082	0.51582	1	8858	2	0.81956	0.0048744	0.020378	0.60246	595	3	0.81956		HIP1	3	0.98963	0.98975	0.999665	18768	0	2.3757	0.010374	0.027747	0.973885	595	3	2.3757
	IGFBP2	5	0.86683	0.86758	1	14987	1	1.0503	0.0048754	0.020382	0.60246	596	4	1.0503		PSPC1	3	0.98961	0.98974	0.999665	18767	0	2.2822	0.01039	0.027787	0.973885	596	3	2.2822
	PTH2	5	0.91597	0.91623	1	15921	0	0.87967	0.0048983	0.02047	0.60246	597	4	0.87967		CSAD	9	0.93829	0.95994	0.999665	17787	1	1.8403	0.010449	0.054675	0.985559	597	6	1.8403
	MAP1LC3C	5	0.9951	0.99511	1	17715	0	0.60524	0.0049009	0.020483	0.60246	598	5	0.60524		DPY19L1	3	0.0096045	0.025754	0.962523	524	1	2.832	0.010464	0.027966	0.973885	598	2	2.832
	TTLL2	5	0.95944	0.95962	1	16773	0	0.84098	0.0049063	0.0205	0.60246	599	4	0.84098		LPAR1	2	0.93113	0.93099	0.999665	17642	0	5.3876	0.01047	0.019857	0.968017	599	2	5.3876
	NIPBL	5	0.99509	0.9951	1	17714	0	1.0704	0.0049121	0.020523	0.60246	600	5	1.0704		S1PR3	3	0.98952	0.98963	0.999665	18764	0	3.1402	0.010482	0.028002	0.973885	600	3	3.1402
	CBR1	5	0.32486	0.49366	1	8488	1	0.86123	0.0049171	0.020541	0.60246	601	3	0.86123		C12orf42	3	0.6241	0.63944	0.999665	12497	1	1.2647	0.010496	0.028037	0.973885	601	2	1.2647
	ATIC	5	0.99227	0.99233	1	17616	0	1.4647	0.0049281	0.020585	0.60246	602	5	1.4647		PENK	6	0.17442	0.36168	0.992088	5656	3	-0.1635	0.010508	0.047071	0.985559	602	3	-0.1635
	HRG	5	0.98824	0.98831	1	17493	0	1.0881	0.0049384	0.020624	0.60246	603	5	1.0881		GEMIN5	3	0.33077	0.45407	0.996866	8929	1	3.0334	0.010517	0.028098	0.973885	603	2	3.0334
	CPSF4	5	0.99506	0.99508	1	17713	0	1.2354	0.0049425	0.020643	0.60246	604	5	1.2354		ADCYAP1	6	0.6059	0.74757	0.999665	12256	1	1.3351	0.010535	0.047184	0.985559	604	5	1.3351
	MRPL49	5	0.97501	0.97518	1	17133	0	0.99668	0.0049442	0.020648	0.60246	605	5	0.99668		MYD88	3	0.39074	0.48688	0.997083	9654	1	2.2912	0.010538	0.028146	0.973885	605	2	2.2912
	FAM63B	5	0.99504	0.99506	1	17712	0	0.61358	0.0049594	0.02071	0.603312	606	5	0.61358		TRIOBP	6	0.98944	0.98947	0.999665	18763	0	1.6256	0.010555	0.047263	0.985559	606	6	1.6256
	STARD4	4	0.20788	0.34327	1	6684	2	-0.35149	0.0049609	0.017291	0.581021	607	1	-0.35149		SUGT1	3	0.98941	0.98953	0.999665	18762	0	1.7709	0.010587	0.028276	0.973885	607	3	1.7709
	ACOT13	4	0.099695	0.21413	0.971089	4074	1	1.419	0.0049875	0.017363	0.581021	608	3	1.419		KRT34	3	0.88314	0.88321	0.999665	16752	0	2.8047	0.010595	0.028294	0.973885	608	3	2.8047
	CNP	5	0.79646	0.81263	1	13944	1	1.2696	0.0049893	0.020825	0.60519	609	3	1.2696		CCDC78	3	0.83494	0.83489	0.999665	15921	0	2.5742	0.0106	0.028307	0.973885	609	2	2.5742
	KCNG2	5	0.70205	0.7591	1	12906	1	0.91777	0.0049984	0.020853	0.60519	610	3	0.91777		SNRNP200	3	0.98938	0.98951	0.999665	18761	0	1.8201	0.010616	0.028345	0.973885	610	3	1.8201
	MOAP1	5	0.99499	0.99501	1	17710	0	0.67917	0.0050072	0.02089	0.60519	611	5	0.67917		EBNA1BP2	6	0.75737	0.83879	0.999665	14622	1	2.0829	0.01062	0.047532	0.985559	611	4	2.0829
	SPSB3	5	0.98718	0.98725	1	17460	0	0.98811	0.0050219	0.020957	0.60519	612	5	0.98811		CDCP1	3	0.89164	0.89169	0.999665	16913	0	3.0892	0.010624	0.028369	0.973885	612	3	3.0892
	HOXC5	5	0.79249	0.81003	1	13901	1	0.29305	0.0050219	0.020957	0.60519	613	3	0.29305		YPEL4	3	0.98934	0.98946	0.999665	18760	0	2.0385	0.010657	0.028459	0.973885	613	3	2.0385
	GUCA2B	5	0.87419	0.87471	1	15123	1	0.89075	0.0050277	0.020976	0.60519	614	4	0.89075		IKBKAP	3	0.22697	0.34705	0.991358	6877	1	0.039302	0.010665	0.028482	0.973885	614	1	0.039302
	CXorf56	7	0.29778	0.5139	1	8074	2	1.3065	0.0050424	0.02643	0.644751	615	5	1.3065		CALHM1	3	0.59524	0.61773	0.999665	12098	1	3.4141	0.010668	0.028488	0.973885	615	2	3.4141
	SNAP25	5	0.99492	0.99495	1	17708	0	0.54136	0.0050757	0.021173	0.606851	616	5	0.54136		SP1	6	0.98933	0.98935	0.999665	18759	0	1.061	0.010671	0.047756	0.985559	616	6	1.061
	LDB2	5	0.86473	0.86559	1	14950	1	0.48256	0.0050779	0.02118	0.606851	617	4	0.48256		KRT40	3	0.27737	0.40896	0.994188	8041	1	2.6015	0.010698	0.02857	0.973885	617	2	2.6015
	ABCC8	5	0.99492	0.99494	1	17707	0	0.60462	0.0050848	0.021204	0.606851	618	5	0.60462		ABLIM2	6	0.9893	0.98932	0.999665	18758	0	1.2956	0.010701	0.047874	0.985559	618	6	1.2956
	GPD1	5	0.9949	0.99493	1	17706	0	0.49062	0.0051045	0.021276	0.606851	619	5	0.49062		TCF24	3	0.98925	0.98938	0.999665	18757	0	2.461	0.01075	0.028705	0.973885	619	3	2.461
	EYA1	5	0.98869	0.98877	1	17502	0	0.96359	0.0051122	0.021304	0.606851	620	5	0.96359		KRTAP1-4	3	0.19475	0.30716	0.991358	6131	1	0.42221	0.01075	0.028705	0.973885	620	2	0.42221
	TAF2	4	0.47324	0.59273	1	10598	1	1.5334	0.0051843	0.018035	0.584854	621	3	1.5334		POGZ	6	0.0074543	0.0304	0.962523	411	2	0.84601	0.010762	0.048115	0.985559	621	4	0.84601
	CACYBP	6	0.82104	0.85099	1	14273	1	0.64856	0.0051871	0.024552	0.642141	622	5	0.64856		ANGEL1	3	0.58191	0.60783	0.999665	11928	1	0.69186	0.010793	0.02881	0.973885	622	2	0.69186
	APOBEC3H	5	0.97274	0.97287	1	17075	0	1.1286	0.0051899	0.021602	0.614385	623	4	1.1286		TSSC4	3	0.76321	0.76348	0.999665	14716	0	2.9306	0.01083	0.028909	0.973885	623	2	2.9306
	C16orf93	4	0.99478	0.99488	1	17705	0	0.93177	0.0052172	0.018139	0.584854	624	4	0.93177		SLC15A2	3	0.92692	0.92702	0.999665	17554	0	2.7845	0.01084	0.028931	0.973885	624	3	2.7845
	ARHGAP36	4	0.90853	0.90822	1	15760	0	0.83825	0.0052298	0.018178	0.584854	625	3	0.83825		TAS1R1	3	0.98913	0.98925	0.999665	18755	0	3.1845	0.010871	0.029022	0.973885	625	3	3.1845
	NMS	5	0.99057	0.99064	1	17558	0	1.493	0.0052321	0.021759	0.617867	626	5	1.493		OCSTAMP	3	0.064513	0.13847	0.983159	2814	1	2.9106	0.010899	0.029102	0.973885	626	2	2.9106
	LOXL1	5	0.98386	0.98398	1	17371	0	0.83845	0.0052566	0.021852	0.619529	627	5	0.83845		SLC25A5	3	0.22549	0.34524	0.991358	6842	1	3.1593	0.01092	0.029161	0.973885	627	2	3.1593
	MANSC4	5	0.55894	0.69955	1	11793	1	1.2891	0.0053002	0.022014	0.6208	628	3	1.2891		ABCC1	3	0.93489	0.93505	0.999665	17726	0	3.0327	0.010949	0.029229	0.973885	628	3	3.0327
	SLC5A3	5	0.18726	0.35597	1	6192	1	0.27653	0.0053019	0.02202	0.6208	629	3	0.27653		TMEM230	3	0.98904	0.98916	0.999665	18753	0	1.337	0.010956	0.029245	0.973885	629	3	1.337
	TMEM127	5	0.18836	0.35757	1	6219	1	1.2959	0.0053106	0.02206	0.6208	630	4	1.2959		PVR	3	0.98904	0.98915	0.999665	18752	0	1.6278	0.01096	0.02926	0.973885	630	3	1.6278
	ZNF683	5	0.97156	0.97171	1	17053	0	0.97833	0.0053135	0.022069	0.6208	631	4	0.97833		TEX101	6	0.98904	0.98906	0.999665	18751	0	1.4679	0.010962	0.048912	0.985559	631	6	1.4679
	TAF11	4	0.99466	0.99476	1	17704	0	0.96296	0.0053449	0.018566	0.589511	632	4	0.96296		UBXN6	6	0.029081	0.099189	0.974719	1523	1	1.5204	0.010991	0.049028	0.985559	632	5	1.5204
	FOXN4	5	0.99017	0.99025	1	17545	0	0.68902	0.0053451	0.022209	0.623747	633	5	0.68902		CLEC4C	3	0.98897	0.98908	0.999665	18750	0	1.7796	0.011032	0.02943	0.973885	633	3	1.7796
	FCRLB	5	0.90786	0.90822	1	15749	0	0.86065	0.0053647	0.022289	0.625027	634	4	0.86065		BTNL10	3	0.98895	0.98907	0.999665	18749	0	1.6011	0.011046	0.029468	0.973885	634	3	1.6011
	ARL8A	5	0.91656	0.91685	1	15928	0	0.71384	0.0053769	0.02233	0.625202	635	4	0.71384		FRK	3	0.48788	0.54461	0.997083	10777	1	2.6493	0.011083	0.02955	0.973885	635	2	2.6493
	MRAS	8	0.28078	0.52794	1	7841	2	0.4969	0.005397	0.028723	0.651765	636	5	0.4969		DNAJA2	3	0.70634	0.70816	0.999665	13745	1	2.0932	0.01109	0.029567	0.973885	636	2	2.0932
	SYTL4	5	0.72904	0.77278	1	13167	1	0.89244	0.0054027	0.022432	0.625683	637	4	0.89244		USH1G	3	0.98889	0.98901	0.999665	18748	0	1.7551	0.01111	0.029616	0.973885	637	3	1.7551
	CIB2	8	0.35052	0.58717	1	8854	1	0.78459	0.0054106	0.028782	0.651765	638	6	0.78459		PLAU	3	0.98887	0.98899	0.999665	18746	0	2.2271	0.011125	0.029653	0.973885	638	3	2.2271
	HARBI1	5	0.72178	0.76901	1	13100	1	0.2252	0.0054139	0.022478	0.625683	639	2	0.2252		SLC7A13	3	0.71748	0.71842	0.999665	13940	1	-0.17421	0.011132	0.029671	0.973885	639	1	-0.17421
	GCLC	5	0.99459	0.99461	1	17703	0	0.73982	0.0054145	0.02248	0.625683	640	5	0.73982		FXYD1	11	0.56518	0.8046	0.999665	11723	1	1.2034	0.011145	0.062188	0.985559	640	8	1.2034
	RAX2	5	0.99206	0.99212	1	17609	0	0.94201	0.0054162	0.022486	0.625683	641	5	0.94201		FOCAD	3	0.95245	0.95271	0.999665	18046	0	3.166	0.011177	0.02978	0.973885	641	3	3.166
	LINGO4	5	0.99458	0.9946	1	17702	0	0.58293	0.0054248	0.022526	0.625833	642	5	0.58293		HPCAL1	15	0.91731	0.9773	0.999665	17384	2	1.2149	0.011185	0.069838	0.985559	642	11	1.2149
	WDR48	4	0.72663	0.73833	1	13149	1	2.1364	0.005442	0.018882	0.595334	643	3	2.1364		SLC7A2	6	0.8974	0.90394	0.999665	17026	1	2.1656	0.011209	0.04992	0.985559	643	5	2.1656
	DUSP3	5	0.84034	0.84462	1	14556	1	0.86347	0.0054532	0.022625	0.62629	644	4	0.86347		PLEKHH1	3	0.55786	0.59089	0.999665	11626	1	3.0793	0.011222	0.029889	0.973885	644	2	3.0793
	C4orf26	4	0.86047	0.85997	1	14885	0	0.16006	0.0054538	0.018922	0.595557	645	2	0.16006		STK24	6	0.44953	0.6429	0.999665	10326	1	1.5843	0.01127	0.050154	0.985559	645	4	1.5843
	TMEM63B	5	0.00049713	0.0022727	0.263973	153	2	0.30998	0.0054698	0.022692	0.62629	646	3	0.30998		OR5J2	3	0.69529	0.69813	0.999665	13576	1	2.6936	0.011272	0.030015	0.973885	646	2	2.6936
	NPBWR2	5	0.99453	0.99456	1	17701	0	0.69844	0.0054744	0.022708	0.62629	647	5	0.69844		CCNY	6	0.094221	0.23687	0.988921	3631	1	2.0297	0.011293	0.050252	0.985559	647	5	2.0297
	ALPK3	5	0.93466	0.93489	1	16282	0	1.2382	0.0054864	0.022754	0.62629	648	4	1.2382		SHQ1	3	0.75463	0.75479	0.999665	14578	0	1.7095	0.011302	0.030085	0.973885	648	2	1.7095
	ABHD3	5	0.43526	0.5889	1	10074	1	0.3669	0.0054894	0.022769	0.62629	649	3	0.3669		KCNK18	3	0.98868	0.98881	0.999665	18745	0	1.9134	0.011318	0.030132	0.973885	649	3	1.9134
	PRPSAP1	5	0.40468	0.56236	1	9627	1	0.69152	0.0054944	0.02279	0.62629	650	3	0.69152		RALGAPA1	3	0.98866	0.98879	0.999665	18744	0	2.3735	0.011337	0.030177	0.973885	650	3	2.3735
	GSK3B	4	0.44382	0.57954	1	10189	1	0.77934	0.0054986	0.019071	0.598156	651	2	0.77934		LRP1B	3	0.17201	0.27823	0.991221	5602	1	0.74549	0.011344	0.030193	0.973885	651	2	0.74549
	KIAA1210	5	0.96489	0.96511	1	16902	0	1.0743	0.0055029	0.022821	0.62629	652	4	1.0743		SLC22A2	3	0.98865	0.98878	0.999665	18743	0	1.4162	0.01135	0.03021	0.973885	652	3	1.4162
	TPM3	6	0.99448	0.99446	1	17700	0	0.59744	0.0055199	0.026005	0.644751	653	6	0.59744		HTR1B	3	0.67349	0.6791	0.999665	13227	1	3.427	0.011358	0.030233	0.973885	653	2	3.427
	MSC	5	0.99447	0.99451	1	17699	0	0.56819	0.0055295	0.022925	0.62689	654	5	0.56819		DENND4B	3	0.98863	0.98876	0.999665	18742	0	1.8022	0.01137	0.03026	0.973885	654	3	1.8022
	GADD45G	5	0.79723	0.81314	1	13953	1	0.84025	0.0055296	0.022925	0.62689	655	3	0.84025		DEF6	3	0.98862	0.98875	0.999665	18741	0	1.7566	0.011383	0.030292	0.973885	655	3	1.7566
	MDH1B	5	0.40872	0.56588	1	9693	1	1.1419	0.0055366	0.022957	0.62689	656	4	1.1419		ZMAT1	3	0.98861	0.98875	0.999665	18740	0	2.1308	0.011387	0.030302	0.973885	656	3	2.1308
	OLFML3	5	0.99446	0.99449	1	17698	0	0.87773	0.0055427	0.022982	0.62689	657	5	0.87773		KIAA1045	3	0.72095	0.7217	0.999665	14000	1	3.2439	0.011413	0.030363	0.973885	657	2	3.2439
	APOL2	5	0.78851	0.80748	1	13850	1	1.2431	0.0055798	0.023132	0.629154	658	4	1.2431		SFTA3	3	0.26877	0.39843	0.994188	7867	2	-0.28144	0.011471	0.030499	0.973885	658	1	-0.28144
	TRIM34	5	0.70815	0.76213	1	12972	1	0.32862	0.0055818	0.023135	0.629154	659	3	0.32862		SPAG5	3	0.67197	0.67781	0.999665	13204	1	3.5162	0.011474	0.030505	0.973885	659	2	3.5162
	PTGS2	5	0.9944	0.99442	1	17697	0	0.85868	0.0056038	0.02323	0.630789	660	5	0.85868		RPA3	3	0.98851	0.98865	0.999665	18738	0	2.2396	0.011493	0.030555	0.973885	660	3	2.2396
	DUSP21	5	0.99437	0.9944	1	17696	0	0.44046	0.0056314	0.02335	0.633074	661	5	0.44046		DDX58	3	0.98846	0.98861	0.999665	18737	0	2.3184	0.011541	0.030662	0.973885	661	3	2.3184
	SEC14L3	5	0.99432	0.99436	1	17694	0	0.90503	0.0056779	0.023523	0.633553	662	5	0.90503		TSHZ1	3	0.98845	0.9886	0.999665	18736	0	1.5795	0.011548	0.030683	0.973885	662	3	1.5795
	PACSIN3	5	0.93134	0.93157	1	16213	0	1.1677	0.0056826	0.023542	0.633553	663	3	1.1677		IGSF3	6	0.11115	0.26945	0.990823	4095	2	1.3233	0.011554	0.051271	0.985559	663	4	1.3233
	MAP2K5	5	0.76629	0.79367	1	13594	1	0.80453	0.0056882	0.023562	0.633553	664	4	0.80453		CYBA	3	0.0070975	0.019294	0.962523	387	1	2.2378	0.011556	0.030698	0.973885	664	2	2.2378
	AIFM2	5	0.49789	0.64417	1	10918	2	0.42355	0.0056937	0.023584	0.633553	665	3	0.42355		FLG2	3	0.98841	0.98857	0.999665	18734	0	1.974	0.011591	0.030785	0.973885	665	3	1.974
	PAK6	5	0.9943	0.99434	1	17693	0	0.47746	0.005695	0.023589	0.633553	666	5	0.47746		HPSE	9	0.7841	0.89505	0.999665	15062	1	1.0063	0.011624	0.059979	0.985559	666	8	1.0063
	TBC1D2	5	0.90089	0.90125	1	15611	0	0.83724	0.0056972	0.023594	0.633553	667	4	0.83724		SERPINF2	6	0.97965	0.97958	0.999665	18570	0	1.0234	0.011677	0.051761	0.985559	667	5	1.0234
	DUSP11	5	0.9943	0.99433	1	17692	0	0.65984	0.0057013	0.023614	0.633553	668	5	0.65984		NAGS	3	0.98821	0.98838	0.999665	18730	0	2.3567	0.011682	0.031025	0.973885	668	3	2.3567
	C14orf105	5	0.87712	0.8776	1	15183	1	0.76498	0.0057123	0.023649	0.633568	669	4	0.76498		VSTM5	3	0.22707	0.34718	0.991358	6880	1	0.74291	0.011683	0.031027	0.973885	669	2	0.74291
	FZD2	5	0.99193	0.99199	1	17603	0	0.73125	0.0057497	0.023803	0.635768	670	5	0.73125		ONECUT1	3	0.98827	0.98845	0.999665	18732	0	1.5571	0.011728	0.031125	0.973885	670	3	1.5571
	HPCA	5	0.99424	0.99427	1	17690	0	0.86521	0.0057583	0.023836	0.635768	671	5	0.86521		GAS6	3	0.98825	0.98842	0.999665	18731	0	1.4936	0.011754	0.031194	0.973885	671	3	1.4936
	DMRT1	5	0.44227	0.59496	1	10162	2	1.1603	0.005759	0.023837	0.635768	672	3	1.1603		PTF1A	3	0.98498	0.98515	0.999665	18669	0	3.5451	0.011764	0.03122	0.973885	672	3	3.5451
	HNRNPA2B1	4	0.99422	0.99434	1	17688	0	1.3834	0.005779	0.020008	0.60246	673	4	1.3834		OR5K2	3	0.28706	0.42062	0.994188	8276	1	0.093907	0.01181	0.031339	0.973885	673	1	0.093907
	C8G	5	0.60597	0.71715	1	12126	1	0.90473	0.0057949	0.023991	0.637252	674	4	0.90473		HLA-DRA	3	0.98814	0.98831	0.999665	18729	0	1.4965	0.01186	0.031474	0.973885	674	3	1.4965
	TCL1A	4	0.9942	0.99433	1	17687	0	1.295	0.0057998	0.020078	0.60246	675	4	1.295		RCAN3	12	0.074822	0.24857	0.989799	3086	3	1.5389	0.011899	0.068051	0.985559	675	8	1.5389
	PSMD2	5	0.67139	0.7446	1	12649	1	0.85597	0.0058057	0.024032	0.637252	676	3	0.85597		RGS9	3	0.9881	0.98827	0.999665	18728	0	1.8126	0.011905	0.03158	0.973885	676	3	1.8126
	APCS	4	0.99302	0.99314	1	17646	0	1.1206	0.005808	0.020101	0.60246	677	4	1.1206		PCGF5	9	0.77606	0.89179	0.999665	14924	2	1.6527	0.011938	0.061416	0.985559	677	7	1.6527
	COQ6	5	0.29469	0.46832	1	8025	1	1.0177	0.0058102	0.024045	0.637252	678	4	1.0177		SLC2A8	3	0.98804	0.98822	0.999665	18727	0	2.069	0.011956	0.03171	0.973885	678	3	2.069
	HMBS	5	0.97918	0.97933	1	17239	0	1.1627	0.0058317	0.024127	0.637829	679	5	1.1627		COL5A2	3	0.45406	0.52375	0.997083	10378	1	2.3887	0.01198	0.031767	0.973885	679	2	2.3887
	NEO1	5	0.99415	0.99418	1	17686	0	0.75848	0.0058525	0.024211	0.639049	680	5	0.75848		ARL5B	3	0.98798	0.98815	0.999665	18726	0	2.4137	0.012023	0.031868	0.973885	680	3	2.4137
	UNKL	13	0.79398	0.92455	1	13916	2	0.5693	0.0058539	0.038211	0.706869	681	10	0.5693		C19orf40	3	0.98795	0.98813	0.999665	18725	0	1.7786	0.01205	0.031937	0.973885	681	3	1.7786
	WNT5A	5	0.81732	0.82722	1	14217	1	1.1759	0.0058616	0.024244	0.639049	682	4	1.1759		ARG1	3	0.91785	0.91793	0.999665	17390	0	1.1637	0.012065	0.031977	0.973885	682	3	1.1637
	LEMD3	5	0.81161	0.82309	1	14136	1	0.02197	0.0058822	0.024332	0.640132	683	2	0.02197		RDH12	2	0.408	0.42593	0.994188	9856	1	2.0112	0.012084	0.022871	0.973885	683	1	2.0112
	TBX6	5	0.90507	0.90544	1	15695	0	0.8662	0.0058876	0.024357	0.640132	684	4	0.8662		CCNF	3	0.98791	0.98808	0.999665	18724	0	2.1881	0.012089	0.032039	0.973885	684	3	2.1881
	TTC29	4	0.057827	0.13562	0.918866	2910	2	-0.65426	0.0059017	0.020408	0.60246	685	1	-0.65426		CSAG1	3	0.9879	0.98808	0.999665	18723	0	1.6212	0.012095	0.032062	0.973885	685	3	1.6212
	KRAS	5	0.041578	0.11989	0.898215	2354	3	-1.0031	0.0059176	0.024469	0.642141	686	2	-1.0031		PTPRD	6	0.9879	0.98791	0.999665	18722	0	1.0377	0.012096	0.0534	0.985559	686	6	1.0377
	ELAC1	5	0.85397	0.85594	1	14772	1	1.0632	0.0059358	0.024535	0.642141	687	4	1.0632		PTH2	3	0.60726	0.62662	0.999665	12274	1	2.5513	0.012107	0.032091	0.973885	687	2	2.5513
	LATS2	5	0.99403	0.99405	1	17684	0	0.92098	0.0059702	0.02467	0.642141	688	5	0.92098		RGS1	3	0.98788	0.98806	0.999665	18721	0	1.6961	0.012116	0.03211	0.973885	688	3	1.6961
	TMEM37	5	0.29539	0.46889	1	8036	2	-0.0087346	0.0059707	0.024671	0.642141	689	2	-0.0087346		WDR86	6	0.030415	0.10228	0.974719	1589	4	-0.59845	0.012116	0.053486	0.985559	689	2	-0.59845
	MEP1B	5	0.94862	0.94883	1	16553	0	0.077711	0.0059735	0.024683	0.642141	690	2	0.077711		TMEM216	3	0.30102	0.43766	0.995347	8596	1	2.5161	0.012146	0.03218	0.973885	690	2	2.5161
	DYX1C1	5	0.55814	0.69885	1	11777	1	1.2195	0.0059831	0.024719	0.642171	691	4	1.2195		PIRT	3	0.34134	0.45972	0.996866	9045	1	2.3669	0.012234	0.032405	0.973885	691	2	2.3669
	ATF2	5	0.85506	0.85687	1	14788	1	1.49	0.0060021	0.024782	0.64219	692	3	1.49		MAP4K2	3	0.98771	0.98787	0.999665	18720	0	2.7237	0.01229	0.032547	0.973885	692	3	2.7237
	CD68	5	0.994	0.99402	1	17683	0	1.0535	0.0060049	0.024792	0.64219	693	5	1.0535		UTP18	3	0.94338	0.94357	0.999665	17872	0	3.8739	0.012292	0.03255	0.973885	693	3	3.8739
	ZNF169	5	0.44262	0.59528	1	10168	1	1.0761	0.006029	0.024889	0.642904	694	3	1.0761		SYT15	3	0.80953	0.80942	0.999665	15513	0	2.6044	0.012297	0.032558	0.973885	694	2	2.6044
	OMP	5	0.10182	0.22594	0.980918	4115	1	0.54119	0.0060295	0.024891	0.642904	695	4	0.54119		SHPK	3	0.9877	0.98786	0.999665	18719	0	1.8488	0.012301	0.032569	0.973885	695	3	1.8488
	CNGA3	5	0.99395	0.99397	1	17682	0	0.71571	0.0060548	0.024989	0.643247	696	5	0.71571		CD177	3	0.98769	0.98784	0.999665	18718	0	2.9447	0.012313	0.032599	0.973885	696	3	2.9447
	IDH3G	5	0.99393	0.99395	1	17681	0	0.74264	0.0060709	0.025047	0.643247	697	5	0.74264		KRTAP1-5	3	0.97675	0.97693	0.999665	18509	0	2.5692	0.012319	0.032611	0.973885	697	3	2.5692
	CCDC71L	5	0.99392	0.99394	1	17680	0	0.82093	0.0060785	0.025075	0.643247	698	5	0.82093		TENM4	3	0.83174	0.8317	0.999665	15875	0	2.6812	0.012323	0.032618	0.973885	698	2	2.6812
	BSN	5	0.9932	0.99324	1	17657	0	0.72883	0.0060805	0.025082	0.643247	699	5	0.72883		IQSEC1	6	0.92799	0.92831	0.999665	17574	1	2.0839	0.012339	0.054397	0.985559	699	4	2.0839
	CABP7	5	0.91602	0.91628	1	15923	0	0.76667	0.0061032	0.025176	0.643667	700	4	0.76667		ENTPD4	3	0.74565	0.74581	0.999665	14430	0	2.1507	0.012361	0.032714	0.973885	700	2	2.1507
	TMEM57	5	0.99389	0.99391	1	17678	0	0.75868	0.0061061	0.025187	0.643667	701	5	0.75868		RFX7	3	0.95706	0.95734	0.999665	18139	0	2.621	0.01237	0.032731	0.973885	701	3	2.621
	TRAF3	5	0.93666	0.93689	1	16318	0	1.556	0.0061171	0.025234	0.643667	702	4	1.556		LHX2	3	0.89484	0.89493	0.999665	16973	0	2.985	0.012438	0.032895	0.973885	702	3	2.985
	ATP6AP1	5	0.8039	0.81763	1	14032	1	0.1785	0.0061414	0.025329	0.643667	703	2	0.1785		TUBB6	3	0.98755	0.98769	0.999665	18717	0	2.1681	0.012454	0.032933	0.973885	703	3	2.1681
	ABI3BP	5	0.78044	0.80237	1	13756	1	1.4897	0.0061517	0.025361	0.643667	704	4	1.4897		PCDHB11	3	0.98638	0.98655	0.999665	18696	0	2.6834	0.01246	0.032942	0.973885	704	3	2.6834
	DYNLL1	4	0.78302	0.78433	1	13779	1	1.7442	0.0061539	0.021216	0.606851	705	3	1.7442		WDR90	3	0.47993	0.53967	0.997083	10683	1	-0.16632	0.012489	0.033011	0.973885	705	1	-0.16632
	SKIV2L	5	0.5233	0.66708	1	11259	2	0.76314	0.0061601	0.025393	0.643667	706	3	0.76314		HS3ST3B1	3	0.83856	0.83854	0.999665	15987	0	2.6242	0.012502	0.033048	0.973885	706	2	2.6242
	PPP2R1B	4	0.99128	0.99139	1	17584	0	1.2086	0.0061742	0.021288	0.606851	707	4	1.2086		SLC24A1	6	0.53335	0.6974	0.999665	11326	1	1.7577	0.012526	0.055138	0.985559	707	5	1.7577
	CSTF2T	5	0.99382	0.99385	1	17677	0	0.52538	0.0061778	0.025456	0.643667	708	5	0.52538		OR7G1	3	0.17434	0.28119	0.991358	5652	2	-0.76105	0.012531	0.033124	0.973885	708	1	-0.76105
	TBC1D9B	5	0.98863	0.98871	1	17501	0	0.95357	0.0061883	0.025502	0.643667	709	5	0.95357		ZBTB10	6	0.89631	0.90322	0.999665	17005	1	1.5635	0.012533	0.055161	0.985559	709	5	1.5635
	NPM2	5	0.99379	0.99381	1	17676	0	0.47696	0.0062086	0.025581	0.643667	710	5	0.47696		DOCK4	3	0.98746	0.98762	0.999665	18716	0	1.2791	0.012537	0.033144	0.973885	710	3	1.2791
	ANKRD39	5	0.6391	0.7306	1	12382	1	0.71135	0.0062372	0.025687	0.643667	711	4	0.71135		BRSK2	8	0.15253	0.36168	0.992088	5122	3	0.65959	0.012544	0.060343	0.985559	711	4	0.65959
	ACOX1	5	0.91512	0.91538	1	15897	0	0.94011	0.0062386	0.025688	0.643667	712	4	0.94011		FLRT1	3	0.78117	0.78125	0.999665	15019	0	1.1584	0.012573	0.033221	0.973885	712	2	1.1584
	LACC1	5	0.04404	0.12601	0.905822	2452	3	-0.58253	0.0062533	0.02574	0.643667	713	1	-0.58253		FAM126A	3	0.98741	0.98756	0.999665	18715	0	2.2849	0.012593	0.033269	0.973885	713	3	2.2849
	PHKG2	5	0.99374	0.99377	1	17675	0	1.1028	0.006256	0.025751	0.643667	714	5	1.1028		GFRA4	3	0.18577	0.29584	0.991358	5909	1	2.5459	0.012597	0.033283	0.973885	714	2	2.5459
	ACTN4	5	0.84014	0.84444	1	14554	1	1.0019	0.0062612	0.025766	0.643667	715	4	1.0019		MS4A3	3	0.82621	0.82615	0.999665	15784	0	0.068394	0.012616	0.033327	0.973885	715	1	0.068394
	FXYD1	5	0.95176	0.95195	1	16610	0	1.0657	0.0062664	0.025781	0.643667	716	3	1.0657		MXRA8	12	0.089666	0.28405	0.991358	3501	5	1.2442	0.012633	0.071477	0.985559	716	7	1.2442
	DUSP9	5	0.99373	0.99375	1	17674	0	0.67458	0.0062725	0.025802	0.643667	717	5	0.67458		TTLL7	3	0.43311	0.51133	0.997083	10128	1	1.6308	0.012658	0.033433	0.973885	717	2	1.6308
	GPR113	5	0.96486	0.96508	1	16900	0	1.0245	0.0062754	0.025814	0.643667	718	4	1.0245		TCEA2	6	0.27966	0.48551	0.997083	8105	2	2.2461	0.012672	0.055723	0.985559	718	4	2.2461
	KCNMB2	5	0.43626	0.58979	1	10085	2	0.84808	0.0063092	0.025949	0.644751	719	3	0.84808		MRTO4	3	0.42431	0.50617	0.997083	10036	1	1.4749	0.0127	0.033546	0.973885	719	2	1.4749
	TULP2	5	0.99367	0.9937	1	17673	0	0.68046	0.0063271	0.02602	0.644751	720	5	0.68046		DUS3L	3	0.98727	0.98741	0.999665	18713	0	1.9885	0.012732	0.033633	0.973885	720	3	1.9885
	CRMP1	5	0.8686	0.86924	1	15022	1	0.65873	0.0063454	0.026084	0.644751	721	3	0.65873		ZNF107	3	0.98727	0.98741	0.999665	18712	0	1.8771	0.012734	0.033641	0.973885	721	3	1.8771
	CNTNAP4	5	0.99365	0.99368	1	17672	0	0.83508	0.0063507	0.026099	0.644751	722	5	0.83508		PIP4K2C	3	0.98726	0.98741	0.999665	18711	0	2.4201	0.012739	0.033652	0.973885	722	3	2.4201
	PEX14	5	0.35464	0.51902	1	8918	2	1.1723	0.0063703	0.026169	0.644751	723	3	1.1723		APOOL	3	0.75152	0.75171	0.999665	14523	0	1.2532	0.012743	0.033664	0.973885	723	2	1.2532
	YPEL5	5	0.99361	0.99364	1	17671	0	0.8671	0.0063881	0.026238	0.644751	724	5	0.8671		ARMC10	3	0.98725	0.9874	0.999665	18710	0	2.1831	0.012751	0.033683	0.973885	724	3	2.1831
	LYPD2	5	0.29973	0.47255	1	8107	1	1.211	0.0064135	0.026325	0.644751	725	4	1.211		RABL2B	3	0.59377	0.61663	0.999665	12079	1	2.461	0.012785	0.033771	0.973885	725	2	2.461
	FCRL4	5	0.19107	0.36149	1	6279	1	1.1567	0.0064181	0.026339	0.644751	726	3	1.1567		FGF12	6	0.96251	0.96269	0.999665	18225	0	0.98926	0.012793	0.056183	0.985559	726	4	0.98926
	C4orf17	5	0.38696	0.54689	1	9376	2	0.056851	0.0064211	0.026352	0.644751	727	2	0.056851		OR56A3	3	0.39674	0.49025	0.997083	9721	1	1.1029	0.012828	0.033879	0.973885	727	2	1.1029
	CHRNA10	5	0.89885	0.89923	1	15575	0	1.1013	0.0064546	0.026473	0.644751	728	3	1.1013		PRR27	3	0.92048	0.92053	0.999665	17430	0	0.70798	0.01287	0.033983	0.973885	728	3	0.70798
	C2orf42	5	0.52881	0.67209	1	11340	1	0.89994	0.006461	0.026495	0.644751	729	4	0.89994		PPP2R5B	3	0.14151	0.23931	0.988921	4871	1	2.3197	0.012912	0.034094	0.973885	729	2	2.3197
	MAPK3	5	0.66709	0.74268	1	12611	1	0.86303	0.0064706	0.026537	0.644751	730	3	0.86303		QTRT1	3	0.14149	0.23928	0.988921	4869	2	-1.4051	0.012955	0.034201	0.973885	730	1	-1.4051
	CCDC64B	5	0.99114	0.99122	1	17576	0	0.93428	0.0064752	0.026555	0.644751	731	5	0.93428		MTHFD1L	6	0.98703	0.98707	0.999665	18709	0	1.4628	0.012966	0.056873	0.985559	731	6	1.4628
	PAXBP1	5	0.68229	0.7497	1	12726	1	0.36841	0.006477	0.02656	0.644751	732	3	0.36841		PTDSS2	3	0.88734	0.88743	0.999665	16825	0	0.43593	0.012997	0.034291	0.973885	732	3	0.43593
	LRIG1	5	0.97731	0.97748	1	17190	0	0.75945	0.0064834	0.026584	0.644751	733	5	0.75945		OR2W3	3	0.0081094	0.021938	0.962523	447	2	-1.7851	0.013039	0.034398	0.973885	733	1	-1.7851
	BAI1	5	0.016005	0.05255	0.771927	1205	1	1.036	0.0064913	0.026622	0.644751	734	4	1.036		METTL24	3	0.78768	0.78778	0.999665	15136	0	3.088	0.013061	0.034442	0.973885	734	2	3.088
	IRF7	5	0.044313	0.12668	0.906419	2466	1	0.64718	0.0065073	0.026682	0.644751	735	4	0.64718		POLR3C	3	0.87504	0.87514	0.999665	16599	0	0.75556	0.013082	0.034496	0.973885	735	3	0.75556
	SMARCC2	5	0.94356	0.94375	1	16467	0	1.0099	0.0065129	0.026708	0.644751	736	4	1.0099		XAGE3	6	0.98691	0.98694	0.999665	18707	0	1.1348	0.013095	0.057366	0.985559	736	6	1.1348
	TPRG1L	5	0.98587	0.98599	1	17424	0	1.6379	0.0065212	0.026735	0.644751	737	5	1.6379		RNF128	6	0.11358	0.27406	0.991165	4169	2	1.1153	0.013125	0.057496	0.985559	737	3	1.1153
	DGKE	5	0.97431	0.97444	1	17111	0	0.85251	0.0065255	0.026753	0.644751	738	4	0.85251		AP1S1	3	0.83682	0.83681	0.999665	15956	0	3.0779	0.013147	0.03466	0.973885	738	2	3.0779
	MSH4	5	0.022205	0.069558	0.815269	1520	1	0.60502	0.0065637	0.026902	0.647153	739	3	0.60502		ANO5	3	0.98684	0.98699	0.999665	18706	0	1.9847	0.013161	0.034693	0.973885	739	3	1.9847
	DDX59	5	0.96988	0.97002	1	17019	0	1.7937	0.0065696	0.026924	0.647153	740	4	1.7937		ARL1	3	0.98683	0.98698	0.999665	18705	0	1.4659	0.013166	0.03471	0.973885	740	3	1.4659
	CYP27B1	5	0.34854	0.51385	1	8830	1	0.73879	0.0065889	0.027002	0.647407	741	4	0.73879		P2RY2	6	0.94782	0.94788	0.999665	17955	0	2.642	0.013194	0.057753	0.985559	741	5	2.642
	SLC27A1	5	0.99341	0.99345	1	17668	0	0.72855	0.0065909	0.027007	0.647407	742	5	0.72855		PADI1	3	0.9868	0.98695	0.999665	18704	0	1.6405	0.013199	0.034782	0.973885	742	3	1.6405
	PTRHD1	5	0.99339	0.99343	1	17667	0	0.75905	0.0066092	0.027069	0.648047	743	5	0.75905		RGPD3	3	0.9868	0.98694	0.999665	18703	0	1.7657	0.013204	0.034797	0.973885	743	3	1.7657
	RLN1	4	0.99337	0.99348	1	17666	0	0.92527	0.0066324	0.022768	0.62629	744	4	0.92527		ART1	3	0.44589	0.51883	0.997083	10281	1	1.636	0.013209	0.034811	0.973885	744	2	1.636
	PRPF18	5	0.95689	0.95708	1	16713	0	1.7022	0.0066447	0.027199	0.648764	745	4	1.7022		LRRC8A	6	0.97384	0.97381	0.999665	18454	0	1.3415	0.013215	0.057825	0.985559	745	5	1.3415
	CTSL	5	0.43145	0.58559	1	10026	2	0.8691	0.0066459	0.027203	0.648764	746	3	0.8691		EPN2	3	0.86405	0.86406	0.999665	16420	0	2.6935	0.013261	0.03494	0.973885	746	2	2.6935
	NXPE3	5	0.99335	0.99339	1	17665	0	1.6792	0.0066478	0.027208	0.648764	747	5	1.6792		TBPL2	3	0.98674	0.98688	0.999665	18701	0	2.0366	0.013261	0.034941	0.973885	747	3	2.0366
	IL3RA	5	0.99328	0.99332	1	17664	0	0.41411	0.0067194	0.027469	0.649973	748	5	0.41411		PCP2	6	0.9692	0.96934	0.999665	18373	0	1.2554	0.013276	0.058063	0.985559	748	4	1.2554
	PTGER3	5	0.96944	0.96959	1	17010	0	1.0807	0.0067279	0.027498	0.649973	749	4	1.0807		TFEB	12	0.15361	0.4017	0.994188	5147	2	1.1604	0.013295	0.074671	0.985559	749	9	1.1604
	SPEN	5	0.99327	0.99331	1	17663	0	0.99187	0.0067338	0.02752	0.649973	750	5	0.99187		ACOT7	12	0.86787	0.95514	0.999665	16490	3	0.60077	0.013299	0.074693	0.985559	750	7	0.60077
	ZKSCAN2	5	0.99325	0.9933	1	17662	0	0.75312	0.0067451	0.027559	0.649973	751	5	0.75312		RAD23B	9	0.98905	0.98917	0.999665	18754	0	0.91919	0.013303	0.067371	0.985559	751	8	0.91919
	CCDC166	5	0.99325	0.9933	1	17661	0	0.97801	0.0067493	0.027578	0.649973	752	5	0.97801		PTBP2	3	0.19376	0.3059	0.991358	6103	2	-0.69471	0.013336	0.035129	0.973885	752	1	-0.69471
	VSIG8	5	0.99322	0.99326	1	17658	0	0.63162	0.0067844	0.02771	0.650637	753	5	0.63162		CIB1	3	0.77822	0.77834	0.999665	14967	0	3.4244	0.013364	0.035199	0.973885	753	2	3.4244
	DNTT	5	0.99319	0.99323	1	17656	0	0.44051	0.0068093	0.027811	0.650637	754	5	0.44051		SCGB2A2	3	0.021992	0.056437	0.962523	1180	2	-0.35358	0.013378	0.035233	0.973885	754	1	-0.35358
	CDCA3	5	0.067922	0.17091	0.946143	3210	3	-1.1369	0.0068172	0.027841	0.650637	755	2	-1.1369		LYZL6	6	0.98661	0.98665	0.999665	18700	0	1.7286	0.013388	0.058501	0.985559	755	6	1.7286
	MYL12B	5	0.99318	0.99322	1	17655	0	1.0178	0.0068197	0.027849	0.650637	756	5	1.0178		ING4	3	0.94735	0.94756	0.999665	17942	0	1.6857	0.01342	0.03535	0.973885	756	3	1.6857
	AANAT	5	0.20595	0.38295	1	6643	2	0.48692	0.0068283	0.027878	0.650637	757	3	0.48692		P2RY6	15	0.36132	0.68448	0.999665	9281	2	1.256	0.013457	0.081361	0.985559	757	11	1.256
	MARC2	5	0.81729	0.8272	1	14216	1	0.78869	0.0068337	0.0279	0.650637	758	4	0.78869		SPRTN	3	0.97877	0.97892	0.999665	18551	0	1.4214	0.013463	0.035454	0.973885	758	3	1.4214
	TRIM40	5	0.99313	0.99317	1	17653	0	0.70402	0.0068729	0.028076	0.651765	759	5	0.70402		CLDN14	12	0.93511	0.97379	0.999665	17731	2	1.3023	0.013471	0.075501	0.985559	759	8	1.3023
	ARNT2	5	0.99312	0.99315	1	17652	0	0.62436	0.0068844	0.028113	0.651765	760	5	0.62436		DDX26B	3	0.82629	0.82623	0.999665	15786	0	1.9561	0.013505	0.03555	0.973885	760	2	1.9561
	PDLIM1	5	0.99311	0.99315	1	17651	0	0.76993	0.0068865	0.02812	0.651765	761	5	0.76993		DDN	3	0.98649	0.98665	0.999665	18699	0	1.5813	0.013509	0.03556	0.973885	761	3	1.5813
	FDFT1	5	0.98163	0.98176	1	17310	0	0.8086	0.0068867	0.02812	0.651765	762	5	0.8086		CDC7	6	0.43837	0.63569	0.999665	10193	1	1.5094	0.01351	0.05899	0.985559	762	5	1.5094
	TFAP2D	5	0.9801	0.98026	1	17264	0	0.54201	0.006912	0.02822	0.651765	763	5	0.54201		ETV7	3	0.83285	0.83281	0.999665	15889	0	2.2398	0.013511	0.035563	0.973885	763	2	2.2398
	C3orf58	5	0.0044058	0.01848	0.586133	556	2	0.22883	0.0069244	0.028263	0.651765	764	3	0.22883		ZNF146	3	0.98648	0.98664	0.999665	18698	0	2.0936	0.013516	0.035579	0.973885	764	3	2.0936
	GLDN	5	0.99307	0.99311	1	17649	0	0.61186	0.0069338	0.028292	0.651765	765	5	0.61186		EHMT1	3	0.49571	0.54964	0.997083	10861	1	2.6171	0.013544	0.03564	0.973885	765	2	2.6171
	RWDD1	7	0.1043	0.25854	0.990693	4178	3	-0.23812	0.0069454	0.034501	0.697533	766	2	-0.23812		FOXH1	3	0.87787	0.87795	0.999665	16653	0	0.35293	0.013548	0.035649	0.973885	766	3	0.35293
	DDTL	3	0.99305	0.99318	1	17648	0	0.93207	0.0069468	0.018974	0.596142	767	3	0.93207		RABEP2	3	0.98645	0.98661	0.999665	18697	0	2.0103	0.013548	0.03565	0.973885	767	3	2.0103
	HSCB	5	0.37434	0.53604	1	9196	1	0.67177	0.0069803	0.028461	0.651765	768	4	0.67177		ARPC2	6	0.97206	0.97212	0.999665	18416	0	1.6457	0.013557	0.059172	0.985559	768	4	1.6457
	PADI4	5	0.993	0.99305	1	17644	0	0.35199	0.0069951	0.028518	0.651765	769	5	0.35199		KLC2	8	0.25825	0.50187	0.997083	7641	2	1.8072	0.013564	0.064397	0.985559	769	6	1.8072
	C2CD4D	5	0.993	0.99305	1	17643	0	0.63477	0.0070015	0.028542	0.651765	770	5	0.63477		ATP5G1	3	0.44733	0.51973	0.997083	10295	1	0.88306	0.013632	0.035866	0.973885	770	2	0.88306
	TTC14	4	0.99299	0.9931	1	17642	0	1.4689	0.0070081	0.023945	0.637252	771	4	1.4689		MRPS26	3	0.98635	0.98651	0.999665	18695	0	1.7841	0.01365	0.035923	0.973885	771	3	1.7841
	COA3	5	0.8071	0.81989	1	14074	1	1.7038	0.007009	0.028568	0.651765	772	3	1.7038		GSG1	6	0.96244	0.96263	0.999665	18221	0	1.1458	0.013671	0.059643	0.985559	772	4	1.1458
	TASP1	5	0.89202	0.89245	1	15459	0	1.2413	0.0070131	0.028586	0.651765	773	4	1.2413		ZNF274	3	0.095922	0.18014	0.983159	3680	2	-1.0766	0.013675	0.035988	0.973885	773	1	-1.0766
	KCNE1	5	0.96034	0.96048	1	16796	0	0.71742	0.0070162	0.028595	0.651765	774	4	0.71742		TPI1	9	0.87585	0.93805	0.999665	16620	1	1.3203	0.013686	0.069038	0.985559	774	7	1.3203
	CCDC28A	5	0.99298	0.99303	1	17640	0	0.7078	0.0070249	0.02863	0.651765	775	5	0.7078		CDC37	3	0.98631	0.98647	0.999665	18694	0	1.8314	0.013687	0.036014	0.973885	775	3	1.8314
	RABGAP1L	14	0.23157	0.52527	1	7171	3	0.3811	0.0070257	0.045169	0.743627	776	8	0.3811		TPCN2	3	0.008952	0.024064	0.962523	494	2	-3.5142	0.013717	0.036097	0.973885	776	1	-3.5142
	PARK7	5	0.31717	0.48719	1	8364	2	0.39924	0.0070362	0.028672	0.651765	777	3	0.39924		CFI	3	0.83412	0.8341	0.999665	15908	0	2.6059	0.01372	0.036101	0.973885	777	2	2.6059
	ATAD3B	4	0.96014	0.95997	1	16788	0	1.0943	0.0070474	0.02407	0.637252	778	4	1.0943		FMO3	3	0.46413	0.52988	0.997083	10500	1	2.6292	0.013753	0.036183	0.973885	778	2	2.6292
	PDXDC1	5	0.49558	0.64211	1	10894	1	1.1698	0.0070548	0.028737	0.651765	779	4	1.1698		C11orf45	6	0.49856	0.67422	0.999665	10896	2	0.90763	0.013759	0.059966	0.985559	779	3	0.90763
	BACE2	5	0.9711	0.97125	1	17047	0	1.119	0.0070573	0.028746	0.651765	780	4	1.119		IL20	3	0.87695	0.87701	0.999665	16633	0	2.4808	0.013759	0.036198	0.973885	780	3	2.4808
	GPR101	5	0.33315	0.50078	1	8616	1	0.55433	0.0070979	0.028905	0.652617	781	3	0.55433		TGIF2	9	0.26278	0.51964	0.997083	7739	3	1.7686	0.013794	0.069492	0.985559	781	5	1.7686
	PINX1	5	0.45981	0.6104	1	10399	1	1.0881	0.0071058	0.028935	0.652617	782	4	1.0881		ZNF551	3	0.71713	0.7181	0.999665	13933	1	3.8716	0.013797	0.036298	0.973885	782	2	3.8716
	ZSCAN18	5	0.99289	0.99295	1	17639	0	0.91291	0.0071061	0.028936	0.652617	783	5	0.91291		ICOS	3	0.9862	0.98635	0.999665	18692	0	1.7723	0.0138	0.036305	0.973885	783	3	1.7723
	C11orf21	5	0.99289	0.99294	1	17638	0	0.46831	0.0071147	0.028964	0.652617	784	5	0.46831		SDC3	3	0.21038	0.32669	0.991358	6476	2	-1.1866	0.013802	0.036309	0.973885	784	1	-1.1866
	RAB43	5	0.66695	0.74261	1	12609	1	1.052	0.0071545	0.029104	0.654142	785	4	1.052		HS3ST6	3	0.82773	0.82765	0.999665	15811	0	2.7024	0.013802	0.03631	0.973885	785	2	2.7024
	COA4	5	0.99232	0.9924	1	17618	0	0.74815	0.0071687	0.029157	0.654142	786	5	0.74815		TMEM9B	6	0.89642	0.9033	0.999665	17009	1	0.33921	0.013806	0.06014	0.985559	786	4	0.33921
	CRTC1	5	0.73317	0.77493	1	13217	1	1.3826	0.0071888	0.029229	0.654142	787	3	1.3826		NDUFS7	3	0.95579	0.95608	0.999665	18110	0	2.5796	0.013846	0.036422	0.973885	787	3	2.5796
	CADM1	5	0.9928	0.99287	1	17637	0	0.60244	0.007198	0.029269	0.654142	788	5	0.60244		CAMKV	3	0.66633	0.67313	0.999665	13139	1	2.9194	0.013858	0.036457	0.973885	788	2	2.9194
	HAAO	5	0.95867	0.95885	1	16749	0	0.8281	0.0072034	0.029289	0.654142	789	4	0.8281		CLDN15	6	0.33763	0.55111	0.997083	9011	3	1.1964	0.013866	0.060376	0.985559	789	3	1.1964
	RNPEP	5	0.27825	0.45452	1	7802	2	0.60131	0.0072039	0.029289	0.654142	790	3	0.60131		KRTAP9-4	3	0.91438	0.91446	0.999665	17333	0	2.4983	0.013874	0.036499	0.973885	790	3	2.4983
	CLDN23	5	0.99278	0.99285	1	17636	0	0.37891	0.0072186	0.029336	0.654142	791	5	0.37891		GLI4	3	0.98611	0.98626	0.999665	18691	0	1.467	0.013886	0.036536	0.973885	791	3	1.467
	RBFA	4	0.99277	0.9929	1	17635	0	0.68897	0.0072263	0.02464	0.642141	792	4	0.68897		POLH	3	0.9861	0.98625	0.999665	18690	0	1.8955	0.013898	0.036558	0.973885	792	3	1.8955
	ESX1	5	0.99276	0.99282	1	17634	0	0.56172	0.0072415	0.02942	0.654142	793	5	0.56172		RRAS	3	0.98608	0.98623	0.999665	18689	0	2.5916	0.013923	0.036628	0.973885	793	3	2.5916
	BCL11B	5	0.97672	0.97688	1	17168	0	0.70926	0.0072459	0.029439	0.654142	794	5	0.70926		MPLKIP	3	0.87924	0.87929	0.999665	16675	0	1.2286	0.013929	0.036644	0.973885	794	3	1.2286
	OSBPL5	5	0.42864	0.58309	1	9977	1	0.80146	0.007255	0.029474	0.654142	795	4	0.80146		STX7	3	0.41384	0.50009	0.997083	9923	1	3.186	0.013946	0.036686	0.973885	795	2	3.186
	OXT	5	0.99274	0.99281	1	17633	0	0.72569	0.0072579	0.029482	0.654142	796	5	0.72569		NKRF	6	0.54964	0.70841	0.999665	11513	1	1.4843	0.013968	0.060746	0.985559	796	5	1.4843
	FAM172A	5	0.052817	0.14564	0.927289	2771	3	-1.4639	0.0072598	0.029489	0.654142	797	1	-1.4639		ADRB1	3	0.98603	0.98618	0.999665	18687	0	1.3844	0.01397	0.036746	0.973885	797	3	1.3844
	BPIFB2	5	0.71595	0.76605	1	13045	1	1.1039	0.0072649	0.029504	0.654142	798	4	1.1039		LBX1	3	0.19115	0.30269	0.991358	6038	2	-0.65635	0.013971	0.036748	0.973885	798	1	-0.65635
	MC1R	5	0.50706	0.6525	1	11048	2	0.7905	0.0072797	0.029559	0.654555	799	3	0.7905		ILK	6	0.986	0.98603	0.999665	18686	0	1.1407	0.013996	0.060848	0.985559	799	6	1.1407
	KLLN	5	0.39233	0.55153	1	9449	1	1.0608	0.0073168	0.029703	0.65612	800	4	1.0608		ESRRA	6	0.98598	0.986	0.999665	18685	0	0.9778	0.014025	0.06097	0.985559	800	6	0.9778
	STMN4	5	0.99263	0.9927	1	17631	0	0.44877	0.0073678	0.029886	0.659368	801	5	0.44877		RGS18	3	0.98529	0.98544	0.999665	18676	0	2.219	0.014063	0.036963	0.976916	801	3	2.219
	ZNF280D	6	0.99262	0.99262	1	17630	0	0.57329	0.0073777	0.033971	0.695623	802	6	0.57329		BRDT	6	0.91507	0.9171	0.999665	17344	1	1.4175	0.014094	0.061238	0.985559	802	5	1.4175
	TMEM170B	5	0.99258	0.99266	1	17628	0	0.47728	0.0074155	0.030066	0.662524	803	5	0.47728		SMC1A	3	0.76508	0.76531	0.999665	14752	0	0.77288	0.014098	0.037044	0.976916	803	2	0.77288
	CHMP2B	6	0.45906	0.63355	1	10389	2	1.0528	0.0074333	0.03422	0.696894	804	4	1.0528		TYW3	3	0.70114	0.70344	0.999665	13664	1	0.98641	0.01414	0.03715	0.976916	804	2	0.98641
	FRMD8	4	0.64782	0.68476	1	12451	1	0.99842	0.0074576	0.025425	0.643667	805	3	0.99842		LPXN	6	0.63534	0.76868	0.999665	12671	2	0.85504	0.014141	0.061406	0.985559	805	4	0.85504
	UBXN11	5	0.99249	0.99256	1	17626	0	0.51544	0.0075116	0.030409	0.668438	806	5	0.51544		ANKUB1	3	0.39166	0.48739	0.997083	9663	1	1.9561	0.014183	0.037249	0.976916	806	2	1.9561
	MED21	5	0.021874	0.068676	0.81277	1502	1	1.0864	0.0075373	0.030521	0.669376	807	4	1.0864		ITIH6	3	0.94477	0.94494	0.999665	17897	0	2.6241	0.014186	0.037255	0.976916	807	3	2.6241
	SMAD2	4	0.99246	0.99258	1	17625	0	1.5483	0.0075424	0.025706	0.643667	808	4	1.5483		XIRP2	6	0.98579	0.98579	0.999665	18684	0	1.2708	0.014211	0.061686	0.985559	808	6	1.2708
	FAHD1	5	0.99246	0.99253	1	17624	0	0.85219	0.0075442	0.030544	0.669376	809	5	0.85219		KIF2A	3	0.98576	0.9859	0.999665	18683	0	1.8097	0.014239	0.037398	0.976916	809	3	1.8097
	FKBP8	5	0.1398	0.28507	0.997997	5092	1	0.82379	0.0075569	0.030582	0.669376	810	4	0.82379		KLHL34	3	0.59311	0.61613	0.999665	12072	1	2.5347	0.014287	0.037522	0.976916	810	2	2.5347
	GTPBP2	5	0.99244	0.99252	1	17623	0	0.75717	0.0075612	0.0306	0.669376	811	5	0.75717		UGDH	3	0.9857	0.98584	0.999665	18682	0	1.528	0.0143	0.037566	0.976916	811	3	1.528
	PTDSS1	5	0.88496	0.88541	1	15334	0	0.26827	0.0075952	0.03072	0.670369	812	2	0.26827		GXYLT1	3	0.98569	0.98583	0.999665	18681	0	1.86	0.01431	0.037592	0.976916	812	3	1.86
	TMEM261	5	0.99238	0.99245	1	17622	0	0.66879	0.0076246	0.030821	0.670585	813	5	0.66879		ETV4	9	0.42206	0.68421	0.999665	10014	2	1.1718	0.014314	0.071701	0.985559	813	6	1.1718
	SLC2A1	5	0.99236	0.99243	1	17621	0	0.69475	0.0076428	0.03089	0.670585	814	5	0.69475		MRPS2	3	0.16427	0.26839	0.990277	5425	1	2.7634	0.014326	0.037632	0.976916	814	2	2.7634
	ASB3	5	0.99235	0.99242	1	17620	0	0.71256	0.0076508	0.030923	0.670585	815	5	0.71256		IDE	6	0.61881	0.7567	0.999665	12424	1	1.7178	0.01433	0.06212	0.985559	815	4	1.7178
	ZXDA	5	0.86256	0.86356	1	14917	1	0.22408	0.0076511	0.030923	0.670585	816	3	0.22408		XAGE1E	6	0.89904	0.90512	0.999665	17061	1	0.85977	0.014346	0.062178	0.985559	816	5	0.85977
	CHAD	5	0.99232	0.99241	1	17619	0	0.53201	0.0076759	0.031018	0.670585	817	5	0.53201		SLC16A4	3	0.79875	0.79877	0.999665	15320	0	1.9881	0.014352	0.037699	0.976916	817	2	1.9881
	TOX	5	0.13636	0.27969	0.997231	4999	1	0.99408	0.007684	0.031048	0.670585	818	4	0.99408		ACBD3	3	0.98561	0.98575	0.999665	18680	0	1.7296	0.014391	0.037777	0.976916	818	3	1.7296
	SLC2A4	4	0.99231	0.99243	1	17617	0	0.72104	0.0076943	0.026185	0.644751	819	4	0.72104		DALRD3	6	0.02641	0.092487	0.974719	1385	1	0.90679	0.014398	0.06236	0.985559	819	4	0.90679
	SMIM2	5	0.88678	0.88729	1	15366	0	0.95039	0.0076948	0.031085	0.670585	820	4	0.95039		KIAA1377	3	0.11806	0.209	0.988233	4277	1	3.5092	0.014416	0.037844	0.976916	820	2	3.5092
	LHX8	5	0.767	0.7941	1	13604	1	1.4598	0.0076993	0.031102	0.670585	821	4	1.4598		SERPINA10	6	0.047446	0.14034	0.983159	2312	3	0.046915	0.014455	0.062585	0.985559	821	3	0.046915
	BPGM	5	0.02342	0.072835	0.826346	1562	1	0.88742	0.0077043	0.031125	0.670585	822	4	0.88742		RIF1	6	0.47735	0.66064	0.999665	10643	1	1.7649	0.014483	0.062682	0.985559	822	5	1.7649
	GRINA	5	0.51375	0.65844	1	11141	2	-0.16332	0.0077069	0.03114	0.670585	823	2	-0.16332		DUSP26	3	0.48607	0.5435	0.997083	10754	1	2.184	0.014495	0.03805	0.976916	823	2	2.184
	COLCA2	5	0.99226	0.99233	1	17615	0	0.81928	0.007739	0.031262	0.67241	824	5	0.81928		FOXR1	3	0.51514	0.56218	0.997083	11113	1	3.2394	0.014506	0.038082	0.976916	824	2	3.2394
	PGLS	5	0.99223	0.9923	1	17614	0	0.93348	0.0077678	0.031355	0.673616	825	5	0.93348		GPX7	3	0.66443	0.67153	0.999665	13107	1	1.3068	0.014521	0.038117	0.976916	825	2	1.3068
	MYD88	5	0.99221	0.99227	1	17613	0	0.43359	0.007792	0.031452	0.674342	826	5	0.43359		SBDS	3	0.98548	0.98563	0.999665	18679	0	3.0093	0.014522	0.038118	0.976916	826	3	3.0093
	USP48	5	0.99219	0.99226	1	17612	0	0.55863	0.0078071	0.031513	0.674342	827	5	0.55863		ETV6	3	0.75916	0.75941	0.999665	14653	0	3.3829	0.01454	0.038172	0.976916	827	2	3.3829
	PSORS1C1	5	0.030406	0.091275	0.859876	1871	1	1.2179	0.0078187	0.031553	0.674342	828	4	1.2179		CELA3A	3	0.23782	0.36048	0.992088	7144	1	2.6606	0.014574	0.038256	0.976916	828	2	2.6606
	TMEM169	5	0.99217	0.99224	1	17611	0	1.1815	0.0078268	0.031576	0.674342	829	5	1.1815		IFIH1	3	0.23257	0.354	0.991358	7028	1	-0.25755	0.014606	0.038338	0.976916	829	1	-0.25755
	KRT76	5	0.99216	0.99222	1	17610	0	1.1004	0.0078419	0.031629	0.674657	830	5	1.1004		PLAGL1	7	0.69452	0.82012	0.999665	13563	2	0.69124	0.014614	0.065248	0.985559	830	5	0.69124
	LARP6	8	0.91881	0.93437	1	15966	1	0.82178	0.0078921	0.039677	0.711653	831	7	0.82178		SETD4	6	0.066796	0.18161	0.983159	2873	4	-0.58222	0.014638	0.063312	0.985559	831	2	-0.58222
	NCR1	5	0.01839	0.05918	0.788131	1329	3	-0.58422	0.0079359	0.032003	0.680217	832	2	-0.58422		SYNGR1	6	0.29334	0.5011	0.997083	8425	3	1.1353	0.014642	0.063326	0.985559	832	3	1.1353
	ARIH2OS	5	0.96681	0.96701	1	16953	0	0.77727	0.0079631	0.032102	0.681516	833	4	0.77727		RAPGEF5	3	0.69928	0.70174	0.999665	13638	1	2.1031	0.014648	0.038449	0.976916	833	2	2.1031
	TMEM218	5	0.82793	0.83498	1	14370	1	0.36845	0.0079897	0.032209	0.682988	834	3	0.36845		MED15	3	0.67333	0.67897	0.999665	13223	1	3.4494	0.014648	0.038449	0.976916	834	2	3.4494
	SNAI3	5	0.99199	0.99205	1	17607	0	0.95736	0.0080131	0.032292	0.683802	835	5	0.95736		UBE2G2	3	0.98534	0.98549	0.999665	18678	0	1.7192	0.014658	0.038475	0.976916	835	3	1.7192
	LRRC38	5	0.99198	0.99204	1	17605	0	0.4664	0.008025	0.032343	0.683802	836	5	0.4664		TUBB3	6	0.65198	0.78081	0.999665	12918	2	1.867	0.014696	0.063535	0.985559	836	4	1.867
	DHX34	5	0.98439	0.98451	1	17389	0	1.0985	0.0080309	0.032361	0.683802	837	5	1.0985		EIF2AK2	6	0.98529	0.98529	0.999665	18677	0	0.70341	0.014707	0.063579	0.985559	837	6	0.70341
	DOC2A	5	0.99196	0.99202	1	17604	0	0.8316	0.0080428	0.0324	0.683813	838	5	0.8316		C9orf57	3	0.98527	0.98542	0.999665	18674	0	1.3861	0.014729	0.038647	0.976916	838	3	1.3861
	CRIP1	4	0.86204	0.8616	1	14906	0	1.0894	0.008052	0.027324	0.649973	839	3	1.0894		PRPF18	3	0.19737	0.31041	0.991358	6196	1	2.9352	0.014796	0.038803	0.976916	839	2	2.9352
	C1QB	5	0.98923	0.98931	1	17519	0	0.74304	0.0080677	0.032492	0.68449	840	5	0.74304		SERPINI2	3	0.4591	0.52681	0.997083	10440	1	-0.114	0.014817	0.038853	0.976916	840	1	-0.114
	PLD2	5	0.95188	0.95206	1	16614	0	1.1456	0.0080809	0.032536	0.68449	841	4	1.1456		BLOC1S3	3	0.98515	0.98531	0.999665	18673	0	1.5887	0.01485	0.038935	0.976916	841	3	1.5887
	HCFC1R1	6	0.99191	0.99192	1	17602	0	0.43371	0.008087	0.037032	0.70253	842	6	0.43371		OSBPL7	3	0.69799	0.70058	0.999665	13620	1	2.8603	0.014916	0.039094	0.976916	842	2	2.8603
	ZNF596	4	0.23885	0.37573	1	7286	1	1.8346	0.0080941	0.027465	0.649973	843	3	1.8346		SI	3	0.92954	0.92966	0.999665	17617	0	2.9746	0.014922	0.039106	0.976916	843	3	2.9746
	YTHDF2	4	0.97554	0.97551	1	17141	0	1.2699	0.0080961	0.027476	0.649973	844	4	1.2699		DYNLT1	3	0.84489	0.84494	0.999665	16100	0	1.2117	0.014944	0.03916	0.976916	844	2	1.2117
	MELK	5	0.098991	0.22141	0.974871	4058	3	-0.43911	0.008098	0.032599	0.68449	845	2	-0.43911		TMEM129	3	0.98504	0.98521	0.999665	18672	0	1.6673	0.014956	0.039194	0.976916	845	3	1.6673
	ABRA	5	0.93757	0.93776	1	16334	0	0.77913	0.008102	0.032615	0.68449	846	4	0.77913		MGEA5	3	0.98504	0.98521	0.999665	18671	0	1.6077	0.014962	0.039208	0.976916	846	3	1.6077
	PRRT3	5	0.9919	0.99197	1	17601	0	0.49932	0.0081034	0.032622	0.68449	847	5	0.49932		TRMT2B	3	0.58279	0.60847	0.999665	11934	1	2.4717	0.014974	0.039236	0.976916	847	2	2.4717
	VCPIP1	5	0.97095	0.97111	1	17043	0	0.25898	0.0081402	0.032763	0.686643	848	4	0.25898		LIPC	3	0.90611	0.9062	0.999665	17178	0	2.5029	0.014979	0.039246	0.976916	848	3	2.5029
	KCNK13	5	0.99185	0.99192	1	17600	0	0.56915	0.0081501	0.032803	0.686685	849	5	0.56915		CTNND1	3	0.96743	0.9676	0.999665	18337	0	2.8575	0.014997	0.039286	0.976916	849	3	2.8575
	PET117	4	0.12104	0.25147	0.990693	4622	1	1.5464	0.0081894	0.027767	0.650637	850	3	1.5464		YAE1D1	3	0.98498	0.98516	0.999665	18670	0	1.8263	0.015016	0.039333	0.976916	850	3	1.8263
	STAT1	5	0.066328	0.16827	0.944169	3162	3	-0.56412	0.0082097	0.033025	0.688045	851	2	-0.56412		PPP2R5C	6	0.90104	0.90655	0.999665	17094	1	1.6061	0.015022	0.064811	0.985559	851	5	1.6061
	CCNL1	5	0.44757	0.59965	1	10242	1	1.0721	0.0082182	0.033055	0.688045	852	4	1.0721		EYA4	3	0.36691	0.47369	0.997083	9358	1	1.6595	0.015029	0.039365	0.976916	852	2	1.6595
	HIST1H3I	5	0.22172	0.40528	1	7002	1	0.91282	0.0082265	0.033091	0.688045	853	4	0.91282		ATP10D	3	0.73785	0.73809	0.999665	14286	1	3.1579	0.015048	0.03942	0.976916	853	2	3.1579
	FAM181A	5	0.99176	0.99184	1	17598	0	0.72343	0.0082356	0.033129	0.688045	854	5	0.72343		ZNF639	3	0.1298	0.2242	0.988233	4582	1	2.7886	0.015071	0.039482	0.976916	854	2	2.7886
	NR2F1	5	0.62541	0.72488	1	12287	1	0.96577	0.008248	0.03317	0.688045	855	4	0.96577		PTPN13	3	0.98492	0.98509	0.999665	18667	0	2.9585	0.015076	0.039491	0.976916	855	3	2.9585
	STRAP	5	0.92781	0.92808	1	16148	0	2.0746	0.0082534	0.033187	0.688045	856	4	2.0746		TRIP11	3	0.98489	0.98506	0.999665	18666	0	1.4502	0.01511	0.039581	0.976916	856	3	1.4502
	CHD3	5	0.95037	0.95055	1	16583	0	0.81446	0.0082641	0.033221	0.688045	857	3	0.81446		SLX1B	3	0.98485	0.98503	0.999665	18665	0	1.7827	0.015149	0.039672	0.976916	857	3	1.7827
	TRIM28	5	0.91408	0.91439	1	15884	0	1.4499	0.0082656	0.033227	0.688045	858	4	1.4499		NOP9	3	0.55241	0.58713	0.999665	11555	1	0.91549	0.015156	0.039689	0.976916	858	2	0.91549
	MDM1	6	0.91368	0.91364	1	15875	1	1.1408	0.0082692	0.037764	0.70642	859	5	1.1408		GOT1L1	3	0.088671	0.17057	0.983159	3470	2	-0.68073	0.015198	0.039792	0.976916	859	1	-0.68073
	CTH	5	0.66981	0.74388	1	12630	1	1.1004	0.0082721	0.03325	0.688045	860	4	1.1004		XPO5	3	0.60189	0.62265	0.999665	12191	1	2.5802	0.015204	0.039806	0.976916	860	2	2.5802
	DDI2	5	0.99168	0.99176	1	17597	0	0.71195	0.0083206	0.033446	0.690634	861	5	0.71195		FAM21A	3	0.90733	0.9074	0.999665	17201	0	2.7569	0.015222	0.039844	0.976916	861	3	2.7569
	LCN6	5	0.54568	0.68738	1	11591	2	1.3186	0.008323	0.033452	0.690634	862	3	1.3186		FAM129B	6	0.98477	0.98477	0.999665	18664	0	1.8651	0.015227	0.065602	0.985559	862	6	1.8651
	ORC6	4	0.72555	0.73752	1	13138	1	1.2533	0.0083559	0.028301	0.651765	863	3	1.2533		GLRA3	3	0.81115	0.81105	0.999665	15541	0	2.4387	0.015245	0.03991	0.976916	863	2	2.4387
	TMPRSS6	5	0.99162	0.99169	1	17596	0	0.69339	0.0083829	0.033682	0.694583	864	5	0.69339		ZFYVE1	6	0.22952	0.42727	0.994188	6949	2	0.21393	0.015254	0.065715	0.985559	864	3	0.21393
	DNAJA1	4	0.40229	0.54739	1	9600	1	1.3747	0.0083972	0.028419	0.651765	865	3	1.3747		YPEL2	3	0.97857	0.97871	0.999665	18543	0	2.5903	0.015285	0.039993	0.976916	865	3	2.5903
	SPNS1	5	0.98924	0.98933	1	17522	0	1.2858	0.0084094	0.033786	0.695361	866	5	1.2858		ABLIM1	9	0.60098	0.79971	0.999665	12175	1	1.1226	0.015308	0.075932	0.985559	866	7	1.1226
	ETS1	4	0.95869	0.95857	1	16750	0	1.0101	0.0084198	0.028489	0.651765	867	4	1.0101		SLC10A1	3	0.22119	0.33994	0.991358	6741	1	2.2741	0.015325	0.040093	0.976916	867	2	2.2741
	UQCRH	5	0.99157	0.99165	1	17593	0	0.65544	0.0084272	0.033852	0.695593	868	5	0.65544		AKT3	6	0.43302	0.63242	0.999665	10125	2	0.19994	0.015326	0.065975	0.985559	868	3	0.19994
	UBASH3B	5	0.99156	0.99164	1	17592	0	0.61569	0.0084358	0.033885	0.695593	869	5	0.61569		FRMPD3	3	0.59161	0.61498	0.999665	12048	1	2.8069	0.015349	0.040162	0.976916	869	2	2.8069
	NRG1	18	0.053934	0.21875	0.973945	2803	7	0.11191	0.0084454	0.058292	0.780754	870	8	0.11191		CARD8	9	0.7505	0.88184	0.999665	14510	2	1.7318	0.015373	0.076216	0.985559	870	6	1.7318
	COX7A2L	5	0.73734	0.77719	1	13264	1	0.29301	0.0084634	0.033998	0.695623	871	3	0.29301		GRB2	3	0.98147	0.98162	0.999665	18607	0	2.5236	0.015378	0.040235	0.976916	871	3	2.5236
	SLC5A11	5	0.9586	0.95877	1	16747	0	0.98545	0.0084796	0.03405	0.695623	872	4	0.98545		PGPEP1	3	0.96107	0.96134	0.999665	18198	0	2.5096	0.01539	0.040264	0.976916	872	3	2.5096
	GTF3C1	5	0.99152	0.9916	1	17591	0	1.1372	0.008484	0.03407	0.695623	873	5	1.1372		RNASE11	3	0.89303	0.89307	0.999665	16934	0	2.5877	0.015396	0.040283	0.976916	873	3	2.5877
	MVP	5	0.97152	0.97167	1	17051	0	0.81645	0.0084881	0.03408	0.695623	874	4	0.81645		SPOCK2	6	0.93902	0.93901	0.999665	17804	0	1.1917	0.015396	0.066248	0.985559	874	5	1.1917
	HSPA14	6	0.99151	0.99152	1	17590	0	1.1018	0.0084948	0.038692	0.708616	875	6	1.1018		OR1N1	3	0.51556	0.56248	0.997083	11119	1	0.17702	0.015409	0.040306	0.976916	875	1	0.17702
	MOG	13	0.83798	0.94207	1	14523	3	0.56729	0.008518	0.05245	0.764145	876	9	0.56729		GNG13	3	0.24077	0.36412	0.992088	7226	1	3.2065	0.015454	0.04041	0.976916	876	2	3.2065
	FAM57B	5	0.99145	0.99153	1	17589	0	1.2048	0.0085498	0.03431	0.697165	877	5	1.2048		JAG1	3	0.3458	0.46214	0.996866	9102	1	3.2869	0.015489	0.040495	0.976916	877	2	3.2869
	VAC14	5	0.98392	0.98403	1	17373	0	0.53833	0.0085678	0.034375	0.697533	878	5	0.53833		GNB4	3	0.95844	0.95869	0.999665	18154	0	1.3835	0.015494	0.040506	0.976916	878	3	1.3835
	LIPG	5	0.38964	0.54917	1	9413	1	1.0824	0.0085832	0.034428	0.697533	879	4	1.0824		WSCD1	3	0.98448	0.98466	0.999665	18662	0	1.4298	0.015516	0.04056	0.976916	879	3	1.4298
	ZCWPW2	5	0.42148	0.57683	1	9887	2	0.09054	0.0086006	0.034514	0.697533	880	2	0.09054		CCT8L2	3	0.96406	0.96425	0.999665	18258	0	2.6698	0.015518	0.040564	0.976916	880	3	2.6698
	TMEM189	5	0.99139	0.99147	1	17588	0	0.73124	0.008611	0.034564	0.697533	881	5	0.73124		SLC37A1	3	0.98448	0.98466	0.999665	18661	0	1.6898	0.015518	0.040565	0.976916	881	3	1.6898
	CNKSR1	5	0.97327	0.97339	1	17084	0	0.45885	0.0086118	0.034567	0.697533	882	4	0.45885		SLC2A4	3	0.30189	0.4387	0.995347	8622	1	2.4653	0.015553	0.040635	0.976916	882	2	2.4653
	B3GALT4	5	0.99137	0.99146	1	17587	0	0.74386	0.0086311	0.034647	0.697533	883	5	0.74386		KIF22	6	0.94993	0.94999	0.999665	17997	0	1.7219	0.015556	0.066858	0.985559	883	5	1.7219
	SLC16A9	5	0.98645	0.98655	1	17436	0	0.81292	0.0086366	0.034661	0.697533	884	5	0.81292		PURA	3	0.7783	0.77842	0.999665	14968	0	0.62434	0.015579	0.040706	0.976916	884	2	0.62434
	OSM	5	0.93996	0.94014	1	16383	0	0.79304	0.0086418	0.034677	0.697533	885	4	0.79304		DGKD	6	0.21683	0.41249	0.994188	6633	3	-0.43808	0.015579	0.066947	0.985559	885	2	-0.43808
	LYNX1	12	0.55674	0.79882	1	11749	3	0.34399	0.0086464	0.051211	0.762135	886	7	0.34399		ENO1	6	0.36824	0.58499	0.999665	9372	1	1.3965	0.015605	0.067038	0.985559	886	5	1.3965
	OXSM	5	0.99133	0.99143	1	17586	0	0.89331	0.0086676	0.03476	0.697929	887	5	0.89331		NDRG3	3	0.69774	0.70037	0.999665	13614	1	0.97403	0.015621	0.040813	0.976916	887	2	0.97403
	FAM107B	9	0.93093	0.9508	1	16205	1	0.89805	0.0087009	0.046153	0.746997	888	7	0.89805		PLIN2	3	0.98435	0.98452	0.999665	18660	0	1.6516	0.015652	0.04089	0.976916	888	3	1.6516
	COA6	6	0.99128	0.99129	1	17585	0	1.1681	0.0087154	0.03961	0.711653	889	6	1.1681		GOLGA8O	1	0.98434	0.98437	0.999665	18659	0	4.7192	0.01566	0.015552	0.968017	889	1	4.7192
	GPR97	5	0.99127	0.99136	1	17583	0	0.60184	0.008732	0.034982	0.697929	890	5	0.60184		EFNA2	3	0.98433	0.9845	0.999665	18658	0	2.4987	0.015673	0.040951	0.976916	890	3	2.4987
	KLHL36	5	0.97256	0.9727	1	17072	0	0.79524	0.0087405	0.035013	0.697929	891	4	0.79524		POU1F1	3	0.67048	0.67652	0.999665	13187	1	3.0805	0.015682	0.040973	0.976916	891	2	3.0805
	ATP2A1	5	0.99125	0.99134	1	17582	0	0.52491	0.0087536	0.035064	0.697929	892	5	0.52491		PMFBP1	6	0.35911	0.57494	0.999283	9257	2	1.695	0.01571	0.06745	0.985559	892	4	1.695
	FAM186B	5	0.99125	0.99134	1	17581	0	0.69627	0.0087548	0.035066	0.697929	893	5	0.69627		UIMC1	7	0.03607	0.11995	0.974719	1820	2	0.48726	0.015719	0.069115	0.985559	893	5	0.48726
	IFNGR2	5	0.1209	0.25581	0.990693	4618	2	-0.20839	0.0087681	0.035109	0.697929	894	1	-0.20839		KRT28	3	0.98427	0.98444	0.999665	18657	0	1.1759	0.015735	0.041101	0.976916	894	3	1.1759
	TMEM86A	5	0.99121	0.99131	1	17580	0	0.58616	0.0087879	0.035175	0.697929	895	5	0.58616		CDK12	3	0.98425	0.98442	0.999665	18656	0	1.4858	0.015748	0.041143	0.976916	895	3	1.4858
	RHOH	5	0.9912	0.99129	1	17579	0	0.47973	0.0088045	0.03523	0.697929	896	5	0.47973		NPW	3	0.98422	0.98439	0.999665	18655	0	1.7275	0.015783	0.041218	0.976916	896	3	1.7275
	RAB11FIP4	5	0.99119	0.99129	1	17578	0	0.89261	0.0088083	0.035243	0.697929	897	5	0.89261		SLC9A4	3	0.1799	0.28837	0.991358	5772	1	1.2737	0.01579	0.041236	0.976916	897	2	1.2737
	PGAM5	5	0.82602	0.83355	1	14346	1	0.79762	0.0088191	0.035279	0.697929	898	4	0.79762		CDC14B	6	0.55382	0.71129	0.999665	11571	2	1.6977	0.015832	0.067921	0.985559	898	4	1.6977
	IL36RN	5	0.9902	0.99027	1	17548	0	0.91423	0.0088318	0.035327	0.697929	899	5	0.91423		WRB	6	0.91297	0.91542	0.999665	17304	1	1.4341	0.015864	0.068039	0.985559	899	5	1.4341
	DCUN1D3	5	0.99117	0.99126	1	17577	0	0.76435	0.0088339	0.035335	0.697929	900	5	0.76435		RUFY2	6	0.92216	0.92305	0.999665	17469	1	1.8527	0.015878	0.068095	0.985559	900	5	1.8527
	SCRG1	5	0.85274	0.85487	1	14759	1	1.1075	0.0088346	0.035339	0.697929	901	4	1.1075		SEMA3E	6	0.98412	0.9841	0.999665	18654	0	1.1367	0.015879	0.068101	0.985559	901	6	1.1367
	CRABP2	5	0.9569	0.95709	1	16714	0	0.66063	0.0088524	0.035403	0.697929	902	4	0.66063		LZTFL1	6	0.022308	0.079676	0.967234	1194	2	1.8595	0.015918	0.068249	0.985559	902	4	1.8595
	CYP1A2	5	0.97956	0.97971	1	17253	0	0.97552	0.0088647	0.035448	0.697929	903	5	0.97552		SMPD4	3	0.12113	0.21295	0.988233	4349	2	-2.3259	0.015959	0.041664	0.981752	903	1	-2.3259
	RBCK1	5	0.99112	0.9912	1	17575	0	0.5712	0.0088774	0.035496	0.697929	904	5	0.5712		CCDC3	5	0.24676	0.44043	0.995347	7368	1	1.4815	0.015968	0.060699	0.985559	904	4	1.4815
	ITGA5	5	0.49003	0.63712	1	10819	2	0.19291	0.0088798	0.0355	0.697929	905	3	0.19291		ATP6V1B1	3	0.97895	0.9791	0.999665	18553	0	2.8924	0.015976	0.041707	0.981752	905	3	2.8924
	CCNJL	5	0.99111	0.99119	1	17574	0	0.61679	0.0088916	0.035546	0.697929	906	5	0.61679		HORMAD1	3	0.95366	0.95396	0.999665	18074	0	2.493	0.015982	0.041715	0.981752	906	3	2.493
	PLA2G12A	5	0.15386	0.3066	1	5436	2	0.99143	0.0089409	0.035717	0.697929	907	3	0.99143		NRXN2	6	0.56927	0.72178	0.999665	11778	1	1.1679	0.015996	0.068566	0.985559	907	5	1.1679
	VHL	5	0.78604	0.80591	1	13812	1	0.87904	0.0089437	0.035731	0.697929	908	4	0.87904		STIM2	3	0.3501	0.46443	0.997083	9159	1	2.9119	0.016042	0.041851	0.981752	908	2	2.9119
	FAM161B	5	0.71979	0.76799	1	13073	1	0.8968	0.0089582	0.035781	0.697929	909	4	0.8968		HMG20B	3	0.72854	0.72898	0.999665	14130	1	2.4094	0.016086	0.041967	0.981752	909	2	2.4094
	CXCL16	5	0.71213	0.76414	1	13014	1	0.73772	0.0089688	0.035823	0.697929	910	3	0.73772		NPTXR	3	0.98388	0.98404	0.999665	18652	0	1.6312	0.016122	0.04206	0.981752	910	3	1.6312
	MASP2	4	0.99103	0.99114	1	17573	0	0.61522	0.0089743	0.030258	0.665926	911	4	0.61522		CCDC151	3	0.98386	0.98402	0.999665	18651	0	2.6416	0.016135	0.042093	0.981752	911	3	2.6416
	PHYHIP	5	0.98975	0.98984	1	17531	0	0.82535	0.008983	0.035873	0.697929	912	5	0.82535		ZNF596	14	0.97978	0.99237	0.999665	18575	1	1.0091	0.016143	0.092012	0.985559	912	11	1.0091
	LAX1	5	0.99102	0.99109	1	17572	0	0.66116	0.0089845	0.035877	0.697929	913	5	0.66116		NT5C2	3	0.91428	0.91437	0.999665	17332	0	2.5124	0.016196	0.04225	0.981752	913	3	2.5124
	TYW1	5	0.16802	0.32773	1	5760	3	-0.32562	0.0089914	0.035899	0.697929	914	1	-0.32562		ZNF3	6	0.4095	0.61769	0.999665	9870	2	1.3166	0.016225	0.069413	0.985559	914	4	1.3166
	VPS37B	5	0.99095	0.99102	1	17571	0	0.587	0.0090547	0.036124	0.699913	915	5	0.587		HAUS2	3	0.93916	0.93936	0.999665	17810	0	3.215	0.016244	0.042364	0.981752	915	3	3.215
	ASGR2	5	0.99093	0.99101	1	17570	0	0.54834	0.0090678	0.036172	0.699913	916	5	0.54834		RPA1	3	0.24191	0.36549	0.992493	7250	2	-0.29597	0.016255	0.042394	0.981752	916	1	-0.29597
	YY1	5	0.92435	0.92466	1	16078	0	1.1674	0.0090703	0.03618	0.699913	917	3	1.1674		NYAP2	3	0.9276	0.92771	0.999665	17565	0	2.1783	0.016292	0.042494	0.981752	917	3	2.1783
	BST2	5	0.78625	0.80605	1	13814	1	1.1211	0.0090763	0.036195	0.699913	918	4	1.1211		CXCL6	3	0.70433	0.70635	0.999665	13711	1	-0.15116	0.016297	0.042512	0.981752	918	1	-0.15116
	SLIRP	5	0.99087	0.99095	1	17569	0	0.84087	0.0091254	0.036364	0.701074	919	5	0.84087		NPDC1	3	0.98367	0.98381	0.999665	18650	0	1.533	0.01633	0.042591	0.981752	919	3	1.533
	SMARCAD1	5	0.79094	0.80903	1	13884	1	1.1487	0.0091388	0.036403	0.701074	920	4	1.1487		OR1L1	3	0.98366	0.98381	0.999665	18649	0	1.6172	0.016335	0.042607	0.981752	920	3	1.6172
	EHF	5	0.99085	0.99093	1	17568	0	0.70929	0.0091477	0.036441	0.701074	921	5	0.70929		TMEM215	3	0.17326	0.27981	0.991358	5631	1	0.18231	0.016339	0.042621	0.981752	921	1	0.18231
	MTX1	5	0.98201	0.98215	1	17317	0	0.66177	0.009149	0.036446	0.701074	922	5	0.66177		ERRFI1	3	0.84722	0.84724	0.999665	16135	0	3.3821	0.016375	0.042705	0.981752	922	2	3.3821
	TTC39A	5	0.85134	0.85371	1	14739	1	-0.11136	0.0091589	0.036487	0.701074	923	2	-0.11136		ERCC2	3	0.95042	0.95066	0.999665	18008	0	2.3636	0.016382	0.042725	0.981752	923	3	2.3636
	CDK8	5	0.99084	0.99092	1	17567	0	0.99626	0.0091596	0.036489	0.701074	924	5	0.99626		RNF113A	3	0.98362	0.98376	0.999665	18648	0	1.8451	0.016382	0.042725	0.981752	924	3	1.8451
	GRIP1	5	0.98033	0.98048	1	17269	0	0.78949	0.0091868	0.036591	0.702185	925	5	0.78949		PAQR8	3	0.38222	0.4822	0.997083	9550	1	0.35304	0.016466	0.042948	0.981752	925	2	0.35304
	ELOVL6	5	0.9908	0.99088	1	17566	0	0.62412	0.0091978	0.036625	0.702185	926	5	0.62412		TCHHL1	3	0.98352	0.98368	0.999665	18646	0	2.0473	0.016476	0.042973	0.981752	926	3	2.0473
	ZNF442	5	0.0439	0.12565	0.905822	2445	4	-0.47279	0.0092147	0.036697	0.70253	927	1	-0.47279		FAM212B	6	0.9835	0.98349	0.999665	18645	0	1.5358	0.016498	0.070428	0.985559	927	6	1.5358
	ZNF148	5	0.12934	0.2689	0.990693	4847	2	1.6721	0.0092363	0.036771	0.70253	928	3	1.6721		UCN	3	0.66041	0.66822	0.999665	13043	1	2.7118	0.016509	0.04305	0.981752	928	2	2.7118
	CAMSAP1	5	0.77101	0.79654	1	13646	1	0.61909	0.0092519	0.036839	0.70253	929	4	0.61909		RFESD	6	0.17886	0.36711	0.992996	5749	1	1.6857	0.016528	0.070555	0.985559	929	5	1.6857
	GBA	9	0.95245	0.96006	1	16627	1	0.66534	0.009274	0.048828	0.760745	930	6	0.66534		HK3	3	0.41626	0.5015	0.997083	9951	1	-0.29902	0.016551	0.043155	0.981752	930	1	-0.29902
	SH2D5	5	0.99072	0.9908	1	17564	0	0.46882	0.009276	0.036913	0.70253	931	5	0.46882		HKR1	3	0.98345	0.98359	0.999665	18644	0	1.8163	0.016553	0.04316	0.981752	931	3	1.8163
	KRTAP12-1	3	0.78776	0.78782	1	13839	0	1.2109	0.0092807	0.024985	0.643247	932	2	1.2109		HIST3H2BB	3	0.98343	0.98357	0.999665	18643	0	2.1441	0.016567	0.043186	0.981752	932	3	2.1441
	ANKMY1	5	0.025074	0.077163	0.832625	1646	1	1.1462	0.009294	0.03699	0.70253	933	4	1.1462		OPN3	3	0.51189	0.56002	0.997083	11071	1	2.9487	0.016568	0.043186	0.981752	933	2	2.9487
	LAMA5	5	0.9907	0.99078	1	17563	0	0.37265	0.0092973	0.036999	0.70253	934	5	0.37265		CCNC	3	0.98342	0.98356	0.999665	18642	0	1.1928	0.016578	0.043218	0.981752	934	3	1.1928
	PIP4K2A	5	0.9907	0.99077	1	17562	0	0.6641	0.009304	0.037023	0.70253	935	5	0.6641		TMEM262	3	0.97352	0.97365	0.999665	18446	0	2.5087	0.016586	0.043236	0.981752	935	3	2.5087
	LYPD5	5	0.99005	0.99013	1	17538	0	0.92409	0.0093082	0.037043	0.70253	936	5	0.92409		SIRPD	3	0.84945	0.84943	0.999665	16169	0	2.0098	0.016598	0.043262	0.981752	936	2	2.0098
	HMHA1	5	0.66679	0.74253	1	12606	1	1.0417	0.009325	0.03711	0.70253	937	4	1.0417		PRR22	3	0.57009	0.59944	0.999665	11789	1	3.2277	0.016628	0.043329	0.981752	937	2	3.2277
	SMO	5	0.99066	0.99074	1	17561	0	0.35089	0.009336	0.037151	0.70253	938	5	0.35089		PKDCC	3	0.98337	0.98351	0.999665	18641	0	2.3431	0.016629	0.04333	0.981752	938	3	2.3431
	RARS	5	0.072138	0.17785	0.950781	3336	2	1.78	0.0093584	0.037232	0.70253	939	3	1.78		CCDC7	6	0.9672	0.96737	0.999665	18332	0	1.0534	0.016631	0.070975	0.985559	939	5	1.0534
	HPSE	5	0.10881	0.23698	0.98849	4286	1	1.4461	0.0093625	0.037244	0.70253	940	4	1.4461		PRR16	3	0.042019	0.1025	0.974719	2100	1	-0.11024	0.016635	0.043345	0.981752	940	1	-0.11024
	EXO1	5	0.78256	0.80372	1	13776	1	0.75093	0.0093683	0.037267	0.70253	941	4	0.75093		EYA1	9	0.24868	0.50423	0.997083	7411	2	0.83061	0.016638	0.081572	0.985559	941	6	0.83061
	RARRES2	5	0.99061	0.99069	1	17560	0	0.71859	0.0093882	0.037331	0.703007	942	5	0.71859		TRPM3	6	0.98336	0.98334	0.999665	18640	0	0.74006	0.016638	0.071003	0.985559	942	6	0.74006
	PDP1	5	0.12024	0.25482	0.990693	4601	1	0.67998	0.0094166	0.037435	0.704154	943	3	0.67998		TCEB3B	3	0.74087	0.74101	0.999665	14345	1	1.3726	0.016678	0.043441	0.981752	943	2	1.3726
	MYL1	5	0.99057	0.99065	1	17559	0	0.65051	0.0094259	0.03747	0.704154	944	5	0.65051		ATCAY	3	0.98329	0.98343	0.999665	18639	0	1.3858	0.016707	0.043513	0.981752	944	3	1.3858
	ALKBH7	5	0.088895	0.2052	0.966693	3781	1	0.82785	0.0094436	0.037544	0.704803	945	4	0.82785		CYP1B1	3	0.98327	0.98342	0.999665	18638	0	1.9271	0.016726	0.043568	0.981752	945	3	1.9271
	PTRF	4	0.99054	0.99063	1	17557	0	0.78965	0.0094627	0.031795	0.677409	946	4	0.78965		JUN	3	0.76982	0.77005	0.999665	14824	0	1.1908	0.016762	0.04366	0.981752	946	2	1.1908
	TAF10	5	0.97421	0.97435	1	17106	0	0.69423	0.0094952	0.037746	0.70642	947	4	0.69423		TMCC2	6	0.82432	0.86447	0.999665	15756	1	1.0881	0.016785	0.071545	0.985559	947	3	1.0881
	FBXO47	5	0.86571	0.86653	1	14966	1	1.1446	0.0094961	0.037751	0.70642	948	4	1.1446		C3orf56	3	0.98321	0.98335	0.999665	18637	0	2.1209	0.01679	0.043717	0.981752	948	3	2.1209
	FSIP1	5	0.38145	0.54213	1	9296	1	1.0709	0.0095081	0.037787	0.70642	949	4	1.0709		HCK	3	0.91991	0.91993	0.999665	17417	0	2.5138	0.016803	0.043749	0.981752	949	3	2.5138
	IL4R	5	0.99044	0.99051	1	17555	0	0.6786	0.00956	0.037981	0.706869	950	5	0.6786		ALX1	3	0.57569	0.60343	0.999665	11858	1	3.1086	0.016821	0.04379	0.981752	950	2	3.1086
	KRT26	5	0.98997	0.99005	1	17536	0	0.9302	0.0095804	0.038055	0.706869	951	5	0.9302		TM9SF4	3	0.98315	0.9833	0.999665	18636	0	1.5473	0.016849	0.043856	0.981752	951	3	1.5473
	POU6F1	5	0.42149	0.57685	1	9889	1	0.83842	0.0095855	0.038069	0.706869	952	4	0.83842		CRIPT	3	0.98315	0.98329	0.999665	18635	0	1.9325	0.016852	0.043864	0.981752	952	3	1.9325
	TH	5	0.99041	0.99048	1	17554	0	0.68545	0.0095873	0.038075	0.706869	953	5	0.68545		PPIP5K1	6	0.84449	0.87374	0.999665	16090	1	1.631	0.016876	0.071891	0.985559	953	5	1.631
	RIMBP3B	5	0.99041	0.99048	1	17553	0	0.65244	0.00959	0.038087	0.706869	954	5	0.65244		TBC1D1	12	0.58927	0.82573	0.999665	12018	2	0.92412	0.016949	0.091522	0.985559	954	10	0.92412
	CASP7	5	0.76349	0.79205	1	13560	1	1.4022	0.0095926	0.038097	0.706869	955	3	1.4022		SUSD1	3	0.98303	0.98318	0.999665	18634	0	1.5741	0.01697	0.044166	0.981752	955	3	1.5741
	TMEM185B	5	0.73587	0.77639	1	13245	1	0.9305	0.0096053	0.038148	0.706869	956	4	0.9305		OTOGL	3	0.1005	0.18614	0.983159	3834	1	1.7504	0.016973	0.044173	0.981752	956	2	1.7504
	C9orf171	5	0.99037	0.99044	1	17552	0	0.47921	0.0096311	0.038243	0.706869	957	5	0.47921		COG3	3	0.80152	0.8015	0.999665	15359	0	2.4627	0.016979	0.044188	0.981752	957	2	2.4627
	TMEM136	5	0.89203	0.89246	1	15460	0	0.46163	0.0096639	0.038357	0.707245	958	4	0.46163		PSMA2	3	0.93379	0.93394	0.999665	17696	0	2.2263	0.017004	0.044242	0.981752	958	3	2.2263
	KAZN	5	0.9903	0.99037	1	17551	0	0.4289	0.009697	0.038478	0.707245	959	5	0.4289		A1BG	3	0.51609	0.56284	0.997083	11128	1	0.80665	0.017016	0.044266	0.981752	959	2	0.80665
	RETN	5	0.9903	0.99037	1	17550	0	1.1378	0.0097039	0.038501	0.707245	960	5	1.1378		TNS2	9	0.84512	0.92225	0.999665	16105	2	0.84112	0.017034	0.08321	0.985559	960	7	0.84112
	LAG3	5	0.47237	0.62153	1	10585	1	1.1468	0.0097075	0.038514	0.707245	961	3	1.1468		SYBU	17	0.018876	0.09888	0.974719	1031	6	0.37262	0.017078	0.10232	0.985559	961	11	0.37262
	TENM1	5	0.99029	0.99036	1	17549	0	0.72237	0.009715	0.038538	0.707245	962	5	0.72237		ARHGEF28	6	0.2495	0.45074	0.996744	7431	2	1.2561	0.01708	0.07266	0.985559	962	3	1.2561
	DEPDC5	5	0.43143	0.58556	1	10024	2	1.1763	0.0097459	0.038659	0.708616	963	3	1.1763		SLCO4C1	3	0.98292	0.98306	0.999665	18632	0	1.9185	0.017084	0.044426	0.981752	963	3	1.9185
	GSS	5	0.82027	0.82933	1	14260	1	0.47353	0.0097727	0.038756	0.709073	964	3	0.47353		OTOL1	3	0.88559	0.88565	0.999665	16796	0	2.3132	0.017089	0.044439	0.981752	964	3	2.3132
	IRF4	5	0.99018	0.99025	1	17546	0	0.84761	0.0098231	0.038942	0.71014	965	5	0.84761		RAVER2	3	0.98291	0.98305	0.999665	18631	0	1.8631	0.017089	0.044439	0.981752	965	3	1.8631
	INPP4A	5	0.98516	0.98528	1	17410	0	1.1914	0.0098279	0.038953	0.71014	966	5	1.1914		LRRC3C	3	0.28117	0.41357	0.994188	8143	2	-0.35837	0.0171	0.044478	0.981752	966	1	-0.35837
	KMT2E	5	0.9674	0.9676	1	16964	0	1.3161	0.0098321	0.03897	0.71014	967	4	1.3161		HDAC4	3	0.98289	0.98303	0.999665	18630	0	1.5361	0.017109	0.044498	0.981752	967	3	1.5361
	PBXIP1	5	0.99017	0.99024	1	17544	0	0.69676	0.0098328	0.038972	0.71014	968	5	0.69676		KRTAP24-1	3	0.019211	0.049641	0.962523	1044	1	1.4794	0.017142	0.044586	0.981752	968	2	1.4794
	GRAMD2	5	0.99012	0.9902	1	17543	0	0.76153	0.0098803	0.039154	0.711653	969	5	0.76153		UGT1A6	6	0.018425	0.067253	0.962523	1009	2	1.1325	0.017181	0.073036	0.985559	969	4	1.1325
	PATE1	5	0.97946	0.97961	1	17250	0	0.75532	0.0098829	0.039166	0.711653	970	5	0.75532		TMEM120B	3	0.82857	0.82849	0.999665	15825	0	2.7051	0.017187	0.044696	0.981752	970	2	2.7051
	CDC42EP3	5	0.99011	0.99019	1	17542	0	0.87617	0.0098901	0.039191	0.711653	971	5	0.87617		CRHR1	3	0.085722	0.16675	0.983159	3381	2	-4.2343	0.017227	0.044796	0.981752	971	1	-4.2343
	TSNAXIP1	5	0.95871	0.95889	1	16751	0	0.72447	0.0099076	0.039243	0.711653	972	4	0.72447		TYMSOS	3	0.98275	0.98289	0.999665	18629	0	2.1725	0.017248	0.044849	0.981752	972	3	2.1725
	NUDT11	3	0.99008	0.99019	1	17541	0	1.2524	0.009919	0.026607	0.644751	973	3	1.2524		SMPD1	3	0.92779	0.9279	0.999665	17571	0	3.4294	0.017285	0.044941	0.981752	973	3	3.4294
	SMPD4	6	0.98328	0.98323	1	17354	0	0.80708	0.0099309	0.044607	0.74009	974	5	0.80708		SCAF11	3	0.85262	0.8526	0.999665	16227	0	2.3796	0.017322	0.045025	0.981752	974	2	2.3796
	SCNN1G	5	0.98234	0.98245	1	17329	0	1.016	0.0099381	0.039345	0.711653	975	5	1.016		GPHN	3	0.80381	0.80375	0.999665	15399	0	0.43723	0.017353	0.045106	0.981752	975	2	0.43723
	C1orf116	5	0.087223	0.20248	0.96613	3733	1	0.51565	0.0099872	0.039522	0.711653	976	4	0.51565		ZNF76	3	0.98265	0.98279	0.999665	18628	0	1.4607	0.017354	0.045107	0.981752	976	3	1.4607
	EMID1	5	0.85447	0.85637	1	14779	1	0.46621	0.010001	0.039572	0.711653	977	3	0.46621		VRK2	8	0.061489	0.18876	0.983159	2725	5	-0.48667	0.017357	0.07929	0.985559	977	3	-0.48667
	TBL3	5	0.99	0.99007	1	17537	0	1.0103	0.010004	0.039583	0.711653	978	5	1.0103		ATG9A	3	0.55957	0.5921	0.999665	11656	1	2.6172	0.017371	0.045152	0.981752	978	2	2.6172
	LIPJ	5	0.93446	0.93469	1	16278	0	1.4207	0.010006	0.03959	0.711653	979	3	1.4207		KLF12	3	0.98261	0.98276	0.999665	18627	0	1.7622	0.017394	0.045209	0.981752	979	3	1.7622
	PHF6	5	0.55222	0.69344	1	11674	2	1.1034	0.010014	0.039624	0.711653	980	3	1.1034		SLC6A13	3	0.98259	0.98274	0.999665	18626	0	1.7787	0.017409	0.045254	0.981752	980	3	1.7787
	CCL5	5	0.98996	0.99004	1	17535	0	0.56826	0.010035	0.039688	0.711653	981	5	0.56826		CD151	3	0.79028	0.79039	0.999665	15174	0	0.52383	0.017438	0.045329	0.981752	981	2	0.52383
	CACNB1	5	0.95715	0.95734	1	16720	0	0.86192	0.010093	0.039899	0.714728	982	4	0.86192		SPRED3	3	0.13058	0.22518	0.988233	4605	1	2.4915	0.017439	0.045331	0.981752	982	2	2.4915
	AKR1C1	4	0.88751	0.88706	1	15379	0	0.21082	0.010104	0.033797	0.695361	983	2	0.21082		DAP3	4	0.83918	0.83857	0.999665	15996	0	1.6223	0.017463	0.056448	0.985559	983	3	1.6223
	PARP4	5	0.98986	0.98994	1	17533	0	0.57162	0.010145	0.040084	0.717055	984	5	0.57162		CDYL	9	0.85119	0.92527	0.999665	16197	2	1.4368	0.017535	0.085316	0.985559	984	7	1.4368
	CNTNAP1	5	0.92329	0.92358	1	16061	0	1.0103	0.010151	0.040109	0.717055	985	4	1.0103		KIAA0895	9	0.54139	0.76149	0.999665	11422	1	1.0973	0.017544	0.085364	0.985559	985	8	1.0973
	LRFN1	5	0.49428	0.64095	1	10876	2	0.74692	0.010219	0.040366	0.719319	986	3	0.74692		SLC1A1	3	0.74381	0.74397	0.999665	14395	1	2.3063	0.017649	0.045859	0.985559	986	2	2.3063
	MED10	4	0.8623	0.86186	1	14911	0	1.1032	0.010238	0.034218	0.696894	987	3	1.1032		KCTD1	15	0.57429	0.84013	0.999665	11843	3	1.0354	0.017652	0.10201	0.985559	987	12	1.0354
	PRH2	5	0.21099	0.3902	1	6761	1	0.63722	0.010239	0.040448	0.719319	988	4	0.63722		MAGI2	3	0.98232	0.98247	0.999665	18625	0	2.1363	0.017683	0.045947	0.985559	988	3	2.1363
	NEURL1B	5	0.98975	0.98984	1	17532	0	0.40502	0.010252	0.040496	0.719319	989	5	0.40502		GAREML	6	0.55934	0.71497	0.999665	11653	2	-0.20687	0.017686	0.074951	0.985559	989	2	-0.20687
	DPYSL2	5	0.039749	0.11529	0.887137	2290	1	1.0354	0.01027	0.04056	0.719319	990	3	1.0354		HLA-A	3	0.16372	0.2677	0.989799	5412	2	-0.81757	0.017691	0.045971	0.985559	990	1	-0.81757
	PROM2	5	0.87138	0.87191	1	15079	1	0.57383	0.010282	0.040596	0.719319	991	3	0.57383		TMEM204	6	0.98228	0.98223	0.999665	18624	0	1.2649	0.017719	0.075081	0.985559	991	6	1.2649
	ANGEL1	5	0.8456	0.8489	1	14632	1	1.3474	0.010282	0.040596	0.719319	992	4	1.3474		CMTM3	6	0.98228	0.98223	0.999665	18623	0	1.0465	0.017722	0.075092	0.985559	992	6	1.0465
	ASB11	5	0.012336	0.042168	0.751046	1007	1	0.43516	0.010295	0.040646	0.719319	993	3	0.43516		QKI	3	0.62595	0.64084	0.999665	12529	1	2.0438	0.017733	0.046083	0.985559	993	2	2.0438
	SMIM20	3	0.23796	0.35939	1	7273	1	1.3586	0.010302	0.027583	0.649973	994	2	1.3586		LYG1	3	0.98226	0.98242	0.999665	18622	0	1.8472	0.017735	0.04609	0.985559	994	3	1.8472
	ANXA1	5	0.86595	0.86676	1	14971	1	1.0704	0.010309	0.040693	0.719319	995	4	1.0704		OSMR	6	0.61576	0.75456	0.999665	12386	2	1.4067	0.017749	0.075185	0.985559	995	3	1.4067
	TCTE1	5	0.26534	0.44368	1	7617	1	0.5065	0.010315	0.040715	0.719319	996	3	0.5065		MC1R	3	0.9822	0.98235	0.999665	18621	0	1.4128	0.017805	0.046257	0.985559	996	3	1.4128
	MTDH	5	0.98968	0.98977	1	17530	0	0.72538	0.01032	0.040732	0.719319	997	5	0.72538		POU2F3	6	0.072203	0.19273	0.983159	2999	1	0.98897	0.017833	0.07545	0.985559	997	5	0.98897
	SYCE3	5	0.92461	0.92491	1	16084	0	1.5487	0.010322	0.04074	0.719319	998	4	1.5487		ITPA	6	0.22364	0.42045	0.994188	6796	2	1.4334	0.017847	0.075491	0.985559	998	3	1.4334
	MECOM	5	0.0025281	0.010925	0.494166	393	3	-0.6996	0.01033	0.04077	0.719319	999	2	-0.6996		DEAF1	3	0.81139	0.81129	0.999665	15546	0	1.0356	0.01786	0.046388	0.985559	999	2	1.0356
	TRMT11	5	0.7717	0.79697	1	13655	1	1.8504	0.010348	0.040835	0.719319	1000	4	1.8504		BLCAP	12	0.12395	0.35214	0.991358	4421	4	0.7932	0.017893	0.095725	0.985559	1000	8	0.7932
	DCAF12L1	5	0.67125	0.74453	1	12647	1	0.75185	0.010378	0.040946	0.720331	1001	4	0.75185		HAVCR2	3	0.98208	0.98224	0.999665	18620	0	1.4808	0.017922	0.046524	0.985559	1001	3	1.4808
	SWT1	3	0.66366	0.66668	1	12573	1	1.4726	0.010378	0.027792	0.650637	1002	2	1.4726		PHLDB2	9	0.67707	0.84931	0.999665	13286	1	1.3993	0.017993	0.087188	0.985559	1002	7	1.3993
	EXOC5	5	0.032322	0.09628	0.86368	1959	4	-0.80488	0.010386	0.040972	0.720331	1003	1	-0.80488		PPM1A	6	0.32894	0.54143	0.997083	8913	2	1.3501	0.018023	0.07602	0.985559	1003	4	1.3501
	SUFU	5	0.49441	0.64106	1	10879	1	0.53612	0.010444	0.041169	0.72217	1004	4	0.53612		SPATS2	3	0.51643	0.56305	0.997083	11134	1	2.8429	0.018023	0.046775	0.985559	1004	2	2.8429
	FCRL5	5	0.98164	0.98177	1	17311	0	1.3403	0.010451	0.041197	0.72217	1005	5	1.3403		GPR52	3	0.98194	0.98211	0.999665	18619	0	1.4545	0.018057	0.046854	0.985559	1005	3	1.4545
	ANKRD30A	5	0.64387	0.73261	1	12421	1	0.9903	0.010471	0.041271	0.722183	1006	4	0.9903		INHA	3	0.98189	0.98205	0.999665	18617	0	1.2256	0.01811	0.046975	0.985559	1006	3	1.2256
	RYR3	5	0.98951	0.9896	1	17528	0	0.81472	0.010492	0.041359	0.722183	1007	5	0.81472		CC2D1A	3	0.039193	0.096188	0.974719	1968	1	2.235	0.018111	0.04698	0.985559	1007	2	2.235
	CRISPLD1	5	0.96304	0.96324	1	16866	0	0.55593	0.010498	0.041374	0.722183	1008	4	0.55593		PREX1	3	0.1814	0.29029	0.991358	5811	1	2.0075	0.018113	0.046983	0.985559	1008	2	2.0075
	SPRY3	5	0.98373	0.98384	1	17363	0	1.054	0.010498	0.041375	0.722183	1009	5	1.054		TMEM167B	3	0.98188	0.98204	0.999665	18616	0	1.2665	0.018118	0.046995	0.985559	1009	3	1.2665
	SQSTM1	5	0.95215	0.95233	1	16619	0	0.91394	0.010504	0.0414	0.722183	1010	4	0.91394		SSX2B	3	0.98188	0.98204	0.999665	18615	0	1.4988	0.018124	0.047008	0.985559	1010	3	1.4988
	TGM4	5	0.92938	0.92964	1	16175	0	0.96387	0.010514	0.041438	0.722183	1011	4	0.96387		ZNF485	3	0.98187	0.98203	0.999665	18614	0	2.2961	0.01813	0.047022	0.985559	1011	3	2.2961
	CYB5D1	5	0.78762	0.80692	1	13836	1	0.39608	0.010553	0.041578	0.723217	1012	4	0.39608		LOC100505478	3	0.98186	0.98202	0.999665	18613	0	1.5638	0.018136	0.047035	0.985559	1012	3	1.5638
	ITGB1BP1	5	0.64311	0.73229	1	12416	1	0.58266	0.010573	0.04166	0.723943	1013	4	0.58266		IFT74	9	0.56604	0.77737	0.999665	11733	1	1.2755	0.018146	0.087844	0.985559	1013	8	1.2755
	PCDHB1	5	0.9894	0.9895	1	17527	0	0.43647	0.010598	0.041747	0.724763	1014	5	0.43647		TP53TG5	3	0.92758	0.92769	0.999665	17564	0	2.1792	0.018156	0.047079	0.985559	1014	3	2.1792
	L3HYPDH	5	0.89925	0.89962	1	15582	0	0.31989	0.010665	0.041969	0.727208	1015	3	0.31989		PCTP	6	0.8868	0.89698	0.999665	16816	1	1.1869	0.018172	0.07645	0.985559	1015	5	1.1869
	TPSAB1	4	0.98933	0.98946	1	17526	0	0.83255	0.010665	0.035547	0.697929	1016	4	0.83255		NEK9	3	0.97398	0.97411	0.999665	18455	0	2.041	0.018174	0.04712	0.985559	1016	3	2.041
	RFPL3	4	0.4802	0.59592	1	10701	1	0.7057	0.010684	0.035603	0.697929	1017	3	0.7057		TG	3	0.82824	0.82818	0.999665	15821	0	2.4534	0.018187	0.047148	0.985559	1017	2	2.4534
	IL16	5	0.98931	0.9894	1	17525	0	0.53882	0.010689	0.042052	0.727946	1018	5	0.53882		ACACA	9	0.10934	0.29573	0.991358	4048	3	1.7175	0.018203	0.088079	0.985559	1018	6	1.7175
	ZNF688	5	0.98929	0.98938	1	17523	0	0.82664	0.010713	0.042137	0.728516	1019	5	0.82664		TMEM86B	3	0.9673	0.96747	0.999665	18334	0	2.7784	0.018218	0.04722	0.985559	1019	3	2.7784
	GCGR	5	0.80956	0.82159	1	14108	1	0.57757	0.010721	0.042166	0.728516	1020	3	0.57757		TMEM140	3	0.98175	0.9819	0.999665	18612	0	1.2859	0.018251	0.047301	0.985559	1020	3	1.2859
	DCLRE1C	5	0.94283	0.94301	1	16449	0	1.0834	0.010742	0.042243	0.728627	1021	4	1.0834		NBPF15	6	0.14643	0.32744	0.991358	4987	1	1.0304	0.018252	0.076689	0.985559	1021	5	1.0304
	ADCY9	5	0.48618	0.63378	1	10770	1	1.0813	0.010757	0.042291	0.728627	1022	4	1.0813		TNS4	3	0.98168	0.98183	0.999665	18611	0	2.0376	0.01832	0.047465	0.985559	1022	3	2.0376
	ABCG2	5	0.98923	0.98932	1	17520	0	0.75382	0.010767	0.042323	0.728627	1023	5	0.75382		NUP54	3	0.98166	0.9818	0.999665	18610	0	2.4988	0.018343	0.04752	0.985559	1023	3	2.4988
	CYP1B1	5	0.56685	0.70243	1	11859	1	0.98116	0.01077	0.042334	0.728627	1024	4	0.98116		B3GNT9	3	0.59266	0.61578	0.999665	12063	1	0.24998	0.018367	0.047566	0.985559	1024	2	0.24998
	ENOX2	5	0.98921	0.98929	1	17518	0	0.75854	0.010792	0.042413	0.729293	1025	5	0.75854		NDFIP2	3	0.98162	0.98177	0.999665	18609	0	1.8175	0.018376	0.047591	0.985559	1025	3	1.8175
	ZNF629	4	0.9892	0.98932	1	17517	0	0.67106	0.010803	0.035982	0.698799	1026	4	0.67106		HPS1	3	0.89979	0.8999	0.999665	17076	0	2.703	0.018395	0.047644	0.985559	1026	3	2.703
	MBNL1	5	0.88038	0.88084	1	15246	0	1.1438	0.010814	0.042488	0.729315	1027	3	1.1438		SAMD15	3	0.76845	0.76867	0.999665	14803	0	0.13257	0.018409	0.047675	0.985559	1027	1	0.13257
	AP1G2	5	0.98917	0.98925	1	17516	0	0.80252	0.010834	0.042561	0.729315	1028	5	0.80252		PPP1R3F	3	0.98153	0.98169	0.999665	18608	0	1.8806	0.018466	0.047821	0.985559	1028	3	1.8806
	ARHGAP25	5	0.87656	0.87704	1	15170	1	0.1742	0.010834	0.042561	0.729315	1029	3	0.1742		PPP1R17	3	0.074085	0.15125	0.983159	3060	1	2.4602	0.018471	0.047833	0.985559	1029	2	2.4602
	H1F0	5	0.98916	0.98924	1	17515	0	0.70445	0.01084	0.042577	0.729315	1030	5	0.70445		NLRP1	3	0.88273	0.88279	0.999665	16746	0	2.1905	0.018484	0.047869	0.985559	1030	3	2.1905
	TMC7	5	0.4637	0.6138	1	10465	2	1.2383	0.010855	0.042628	0.729497	1031	3	1.2383		GGTLC1	6	0.65988	0.78661	0.999665	13036	1	1.5615	0.018491	0.077418	0.985559	1031	4	1.5615
	SBK1	5	0.94432	0.9445	1	16474	0	0.76096	0.010878	0.042717	0.730327	1032	4	0.76096		IL17REL	3	0.76945	0.76968	0.999665	14816	0	0.19981	0.018493	0.047894	0.985559	1032	2	0.19981
	SNN	5	0.98908	0.98917	1	17514	0	0.658	0.010923	0.042883	0.732096	1033	5	0.658		BBS7	3	0.97514	0.9753	0.999665	18476	0	2.6901	0.018503	0.047914	0.985559	1033	3	2.6901
	ARNT	5	0.79982	0.81488	1	13984	1	1.0172	0.010964	0.043037	0.733558	1034	4	1.0172		PAX8	3	0.97532	0.97549	0.999665	18481	0	2.549	0.018515	0.047943	0.985559	1034	3	2.549
	ADI1	5	0.20829	0.38636	1	6691	1	1.0837	0.010972	0.043069	0.733558	1035	4	1.0837		CEP85L	6	0.77904	0.84634	0.999665	14979	1	1.3511	0.018528	0.077527	0.985559	1035	4	1.3511
	NINJ2	5	0.98902	0.98911	1	17512	0	0.66178	0.010984	0.043119	0.733707	1036	5	0.66178		OR10V1	3	0.0050123	0.013815	0.962523	286	2	-1.161	0.018578	0.048087	0.985559	1036	1	-1.161
	TRAF7	5	0.98897	0.98906	1	17510	0	0.57956	0.011034	0.043308	0.734913	1037	5	0.57956		GIGYF2	3	0.98139	0.98155	0.999665	18606	0	2.1861	0.018606	0.04815	0.985559	1037	3	2.1861
	NXPH1	5	0.80283	0.81689	1	14020	1	0.28202	0.011055	0.043375	0.734913	1038	4	0.28202		SIGLEC14	3	0.11519	0.20531	0.986185	4217	1	0.57908	0.01862	0.048185	0.985559	1038	2	0.57908
	PHOX2B	5	0.98894	0.98902	1	17509	0	0.9566	0.011059	0.043393	0.734913	1039	5	0.9566		NEURL3	3	0.98138	0.98153	0.999665	18605	0	2.4795	0.018621	0.048189	0.985559	1039	3	2.4795
	RLN2	3	0.98891	0.98901	1	17508	0	0.69032	0.011091	0.0296	0.654651	1040	3	0.69032		POP4	3	0.56115	0.5932	0.999665	11678	1	3.6339	0.018623	0.048193	0.985559	1040	2	3.6339
	DCP1B	4	0.98891	0.98904	1	17507	0	0.89188	0.011094	0.036897	0.70253	1041	4	0.89188		TIE1	3	0.98138	0.98153	0.999665	18604	0	1.4599	0.018624	0.048195	0.985559	1041	3	1.4599
	MRGPRE	5	0.86826	0.86892	1	15010	1	0.30891	0.011105	0.043579	0.736259	1042	3	0.30891		PGM3	6	0.69085	0.81002	0.999665	13494	1	1.1753	0.018644	0.077884	0.985559	1042	5	1.1753
	SHISA9	5	0.84971	0.85231	1	14704	1	0.60539	0.011112	0.043605	0.736259	1043	4	0.60539		DLL3	3	0.98134	0.98148	0.999665	18603	0	2.6584	0.01866	0.048283	0.985559	1043	3	2.6584
	ZNF444	5	0.85127	0.85364	1	14736	1	1.0831	0.011124	0.043653	0.736259	1044	4	1.0831		TMEM171	3	0.1665	0.27125	0.991165	5470	2	-1.6116	0.018662	0.048286	0.985559	1044	1	-1.6116
	STAG3	5	0.98887	0.98895	1	17506	0	0.505	0.011126	0.043658	0.736259	1045	5	0.505		NEU4	6	0.97362	0.97361	0.999665	18448	0	1.5439	0.018696	0.078023	0.985559	1045	5	1.5439
	EIF3G	5	0.30214	0.47451	1	8152	1	0.97362	0.011133	0.043687	0.736259	1046	3	0.97362		KCNQ1	5	0.9066	0.90691	0.999665	17187	0	1.903	0.018702	0.070107	0.985559	1046	4	1.903
	CCDC68	5	0.84356	0.8472	1	14602	1	2.0474	0.011143	0.04372	0.736259	1047	4	2.0474		TMEM43	3	0.54022	0.57887	0.999665	11408	1	0.1232	0.018704	0.048405	0.985559	1047	1	0.1232
	MAPK4	5	0.98885	0.98893	1	17505	0	0.80873	0.011154	0.043759	0.736259	1048	5	0.80873		RNF212	3	0.65447	0.66344	0.999665	12952	1	2.6058	0.018719	0.048447	0.985559	1048	2	2.6058
	SV2A	5	0.79697	0.81298	1	13951	1	0.95233	0.011182	0.043861	0.736838	1049	3	0.95233		RBMY1B	2	0.98126	0.98119	0.999665	18602	0	2.5778	0.018745	0.034862	0.973885	1049	2	2.5778
	RFPL1	4	0.83337	0.83273	1	14456	0	0.80709	0.011205	0.037267	0.70253	1050	2	0.80709		RHBDF1	3	0.62517	0.64025	0.999665	12514	1	0.28319	0.018746	0.048511	0.985559	1050	2	0.28319
	CYP2B6	5	0.64148	0.73159	1	12402	1	0.94289	0.011222	0.04399	0.736838	1051	3	0.94289		RCBTB1	3	0.49715	0.55053	0.997083	10879	1	2.848	0.018795	0.048632	0.985559	1051	2	2.848
	IKBKB	5	0.87584	0.87634	1	15159	1	0.98006	0.011224	0.043996	0.736838	1052	4	0.98006		CCND3	5	0.58974	0.72727	0.999665	12023	1	2.8278	0.018814	0.070481	0.985559	1052	4	2.8278
	MUCL1	5	0.96165	0.96182	1	16836	0	1.2838	0.011257	0.04411	0.736838	1053	4	1.2838		RBMY1F	3	0.62546	0.64046	0.999665	12518	1	-0.083666	0.018831	0.04872	0.985559	1053	1	-0.083666
	IKBKE	5	0.89477	0.89522	1	15511	0	1.0531	0.011266	0.044144	0.736838	1054	4	1.0531		EMID1	3	0.84345	0.84347	0.999665	16072	0	2.8432	0.018872	0.04882	0.985559	1054	2	2.8432
	BOC	5	0.98872	0.9888	1	17504	0	0.61088	0.011276	0.044169	0.736838	1055	5	0.61088		AK7	3	0.63825	0.65053	0.999665	12708	1	1.3009	0.018873	0.048822	0.985559	1055	2	1.3009
	CACNG4	5	0.71178	0.76395	1	13011	1	0.38036	0.011278	0.04418	0.736838	1056	3	0.38036		TSEN34	9	0.39025	0.65282	0.999665	9649	4	1.4198	0.018875	0.090863	0.985559	1056	5	1.4198
	MED16	5	0.64041	0.73115	1	12389	1	1.0168	0.011279	0.044183	0.736838	1057	4	1.0168		ZNF407	3	0.9811	0.98122	0.999665	18600	0	1.2845	0.018902	0.048895	0.985559	1057	3	1.2845
	STRADA	5	0.9887	0.98878	1	17503	0	0.7131	0.011297	0.044237	0.736838	1058	5	0.7131		UGGT2	3	0.64789	0.65815	0.999665	12865	1	2.5392	0.018904	0.048899	0.985559	1058	2	2.5392
	GDE1	5	0.89676	0.89719	1	15537	0	1.3317	0.011309	0.044279	0.736838	1059	4	1.3317		CNGA4	3	0.041248	0.1008	0.974719	2060	2	-3.287	0.018957	0.049036	0.985559	1059	1	-3.287
	PPP1R14D	5	0.9341	0.93431	1	16272	0	1.3325	0.011321	0.044326	0.736838	1060	3	1.3325		ZIM3	3	0.41042	0.49807	0.997083	9882	1	2.5433	0.018968	0.049061	0.985559	1060	2	2.5433
	TFPT	5	0.89587	0.89634	1	15525	0	0.94882	0.011351	0.044432	0.737921	1061	4	0.94882		PGLYRP4	3	0.98099	0.98111	0.999665	18599	0	1.3975	0.019014	0.04917	0.985559	1061	3	1.3975
	KIAA1217	5	0.18936	0.35902	1	6237	1	1.0276	0.011408	0.044645	0.74009	1062	4	1.0276		RAB3D	3	0.98094	0.98107	0.999665	18598	0	2.4094	0.019063	0.049293	0.985559	1062	3	2.4094
	LETM1	5	0.11754	0.25066	0.990693	4529	2	0.24246	0.011445	0.044772	0.741513	1063	1	0.24246		NKX1-2	3	0.66596	0.67282	0.999665	13133	1	2.8717	0.019065	0.049297	0.985559	1063	2	2.8717
	DLAT	5	0.25589	0.43578	1	7504	2	0.81331	0.011478	0.044893	0.742843	1064	3	0.81331		KRTAP4-3	3	0.85062	0.85058	0.999665	16185	0	0.86808	0.019084	0.04934	0.985559	1064	2	0.86808
	CSN1S1	4	0.14793	0.27993	0.997231	5281	2	-0.35658	0.011487	0.038112	0.706869	1065	1	-0.35658		PRR7	6	0.64316	0.77431	0.999665	12789	2	1.5386	0.019085	0.079209	0.985559	1065	4	1.5386
	ALDH6A1	5	0.5391	0.68142	1	11484	1	0.9664	0.011495	0.044955	0.742978	1066	3	0.9664		SLC22A10	3	0.69403	0.69698	0.999665	13550	1	2.398	0.019103	0.049388	0.985559	1066	2	2.398
	MASP1	5	0.68198	0.74954	1	12725	1	0.36335	0.011501	0.044984	0.742978	1067	4	0.36335		WDR76	3	0.31346	0.44504	0.995666	8762	1	3.3738	0.01911	0.049405	0.985559	1067	2	3.3738
	REG1A	3	0.18148	0.28777	0.999468	6066	1	1.2658	0.011534	0.030661	0.669897	1068	2	1.2658		BIRC6	3	0.8803	0.88033	0.999665	16701	0	2.85	0.019116	0.049421	0.985559	1068	3	2.85
	SGCZ	5	0.98846	0.98853	1	17500	0	0.64411	0.011543	0.045129	0.743627	1069	5	0.64411		PRSS46	3	0.89482	0.89491	0.999665	16972	0	2.81	0.019123	0.049434	0.985559	1069	3	2.81
	CELA3B	4	0.98845	0.98857	1	17499	0	0.57546	0.011551	0.038323	0.707245	1070	4	0.57546		TAGLN2	9	0.78326	0.8947	0.999665	15045	2	0.91548	0.019135	0.091919	0.985559	1070	6	0.91548
	CLN5	5	0.98845	0.98852	1	17498	0	0.8508	0.011554	0.045162	0.743627	1071	5	0.8508		FAM107B	12	0.10841	0.32492	0.991358	4032	4	0.47124	0.019143	0.10119	0.985559	1071	7	0.47124
	STAC	5	0.98843	0.9885	1	17497	0	0.60319	0.011573	0.045234	0.743627	1072	5	0.60319		CMPK2	3	0.98083	0.98096	0.999665	18597	0	1.4361	0.019167	0.049537	0.985559	1072	3	1.4361
	CLLU1OS	5	0.34534	0.51113	1	8786	1	0.26259	0.011578	0.045252	0.743627	1073	3	0.26259		OR8K1	3	0.96407	0.96427	0.999665	18259	0	1.633	0.019168	0.04954	0.985559	1073	3	1.633
	PKNOX2	5	0.91284	0.91317	1	15857	0	1.1082	0.011584	0.045271	0.743627	1074	3	1.1082		RFPL2	11	0.48242	0.7462	0.999665	10712	4	0.089284	0.019182	0.096671	0.985559	1074	5	0.089284
	TM2D1	5	0.81625	0.82648	1	14198	1	0.11079	0.011612	0.045366	0.744501	1075	1	0.11079		LOC100144595	3	0.49341	0.54816	0.997083	10837	1	0.6796	0.019211	0.049641	0.985559	1075	2	0.6796
	DDT	3	0.80727	0.80717	1	14075	0	0.99163	0.011631	0.030908	0.670585	1076	2	0.99163		EPG5	3	0.98079	0.98092	0.999665	18596	0	1.4582	0.019213	0.049646	0.985559	1076	3	1.4582
	TNFSF13	5	0.98836	0.98843	1	17495	0	0.79542	0.011645	0.045493	0.745911	1077	5	0.79542		UBALD2	3	0.78115	0.78123	0.999665	15018	0	2.4152	0.019245	0.049728	0.985559	1077	2	2.4152
	RAB39A	5	0.19191	0.36269	1	6304	2	0.96376	0.011663	0.045565	0.746251	1078	3	0.96376		LY6K	3	0.95428	0.95459	0.999665	18086	0	1.0933	0.019295	0.049842	0.985559	1078	3	1.0933
	BTRC	5	0.98833	0.9884	1	17494	0	0.58583	0.011674	0.045597	0.746251	1079	5	0.58583		EPS15L1	3	0.050507	0.11957	0.974719	2415	1	2.5457	0.019303	0.049864	0.985559	1079	2	2.5457
	HSPG2	5	0.97365	0.97378	1	17091	0	0.85499	0.011713	0.04575	0.74665	1080	4	0.85499		SLC26A8	7	0.92221	0.93113	0.999665	17470	1	1.654	0.019343	0.081645	0.985559	1080	5	1.654
	VTN	5	0.53313	0.67601	1	11398	2	0.62404	0.011724	0.045787	0.74665	1081	3	0.62404		ARRB2	3	0.95269	0.95297	0.999665	18049	0	2.7972	0.019355	0.049983	0.985559	1081	3	2.7972
	PDGFD	5	0.32161	0.49083	1	8435	2	0.561	0.011756	0.045894	0.746997	1082	3	0.561		RTBDN	12	0.39982	0.69406	0.999665	9757	3	1.2397	0.019394	0.1023	0.985559	1082	8	1.2397
	NIPAL1	5	0.94399	0.94419	1	16468	0	1.1417	0.011779	0.045978	0.746997	1083	4	1.1417		CLPTM1L	3	0.16355	0.26747	0.989799	5406	1	2.8458	0.019407	0.0501	0.985559	1083	2	2.8458
	COMMD3	5	0.98822	0.98828	1	17491	0	1.08	0.011781	0.045988	0.746997	1084	5	1.08		PGR	8	0.38939	0.63352	0.999665	9634	3	0.88927	0.019413	0.087122	0.985559	1084	5	0.88927
	ASPDH	5	0.86602	0.86682	1	14973	1	0.78448	0.011811	0.04609	0.746997	1085	4	0.78448		MYL10	3	0.74937	0.74957	0.999665	14494	0	1.4148	0.019421	0.050136	0.985559	1085	2	1.4148
	WFDC1	5	0.45157	0.60316	1	10298	1	0.66208	0.011818	0.046113	0.746997	1086	4	0.66208		CYP4F3	3	0.92946	0.92958	0.999665	17614	0	3.1868	0.019452	0.050209	0.985559	1086	3	3.1868
	ACVR1	5	0.0013206	0.0058656	0.409146	260	1	0.60763	0.011821	0.046124	0.746997	1087	4	0.60763		SCAPER	6	0.98075	0.98069	0.999665	18595	0	1.3288	0.019453	0.080296	0.985559	1087	5	1.3288
	ZNF41	5	0.96391	0.9641	1	16880	0	0.75346	0.011824	0.046137	0.746997	1088	4	0.75346		PRAMEF19	3	0.98053	0.98065	0.999665	18593	0	1.2789	0.019468	0.050253	0.985559	1088	3	1.2789
	NIFK	5	0.98816	0.98821	1	17490	0	1.9399	0.011839	0.046192	0.746997	1089	5	1.9399		SYNE4	3	0.98051	0.98062	0.999665	18592	0	1.6498	0.019493	0.050315	0.985559	1089	3	1.6498
	PABPC1L2B	3	0.98325	0.98338	1	17352	0	1.0434	0.011853	0.031464	0.674342	1090	3	1.0434		HAUS1	3	0.98043	0.98055	0.999665	18590	0	1.2888	0.019567	0.050489	0.985559	1090	3	1.2888
	MLLT4	5	0.98815	0.98819	1	17489	0	0.80708	0.011854	0.046248	0.746997	1091	5	0.80708		GAB4	3	0.98043	0.98055	0.999665	18589	0	1.801	0.01957	0.050496	0.985559	1091	3	1.801
	PDCD2	7	0.95294	0.95295	1	16636	0	1.0144	0.01186	0.05318	0.767101	1092	6	1.0144		SNTN	3	0.77357	0.77373	0.999665	14879	0	0.64533	0.01959	0.050538	0.985559	1092	2	0.64533
	MYO18A	5	0.98813	0.98818	1	17488	0	0.63078	0.011867	0.046291	0.746997	1093	5	0.63078		BTN3A3	3	0.98037	0.98049	0.999665	18588	0	1.5594	0.019626	0.05062	0.985559	1093	3	1.5594
	ZG16B	5	0.98813	0.98818	1	17487	0	0.36892	0.01187	0.046306	0.746997	1094	5	0.36892		SEMG2	3	0.91778	0.91787	0.999665	17389	0	2.136	0.019632	0.05063	0.985559	1094	3	2.136
	FOXE1	4	0.9832	0.98327	1	17349	0	1.1009	0.011878	0.039312	0.711653	1095	4	1.1009		ZNF761	9	0.82655	0.91351	0.999665	15792	1	0.96536	0.019666	0.094095	0.985559	1095	8	0.96536
	ATP2B2	5	0.93975	0.93993	1	16378	0	0.7102	0.011889	0.046375	0.747299	1096	4	0.7102		FAM210A	3	0.89938	0.89951	0.999665	17070	0	0.88481	0.019674	0.050728	0.985559	1096	3	0.88481
	REM2	5	0.44414	0.59661	1	10193	1	0.52179	0.0119	0.046408	0.747299	1097	4	0.52179		C3orf17	3	0.98029	0.98039	0.999665	18587	0	1.3954	0.019714	0.050817	0.985559	1097	3	1.3954
	KCNQ1	5	0.98807	0.98812	1	17486	0	0.49404	0.01193	0.046521	0.748454	1098	5	0.49404		PPID	3	0.82868	0.8286	0.999665	15827	0	1.5552	0.019717	0.050827	0.985559	1098	2	1.5552
	CRYBA2	5	0.98805	0.98809	1	17485	0	0.50944	0.011954	0.046614	0.749271	1099	5	0.50944		FBXO17	6	0.94573	0.94575	0.999665	17911	0	1.5665	0.019779	0.081248	0.985559	1099	5	1.5665
	YLPM1	5	0.19896	0.37292	1	6470	1	0.875	0.011983	0.046713	0.750192	1100	4	0.875		TENM1	3	0.89321	0.89324	0.999665	16938	0	2.5681	0.019837	0.051109	0.985559	1100	3	2.5681
	NXPE2	5	0.94056	0.94074	1	16395	0	0.79844	0.012011	0.046815	0.751174	1101	3	0.79844		SATL1	3	0.98013	0.98024	0.999665	18584	0	1.6976	0.019873	0.051197	0.985559	1101	3	1.6976
	CCDC101	5	0.69576	0.75604	1	12855	1	1.0133	0.012058	0.046998	0.752762	1102	4	1.0133		MED31	3	0.98005	0.98016	0.999665	18583	0	1.8115	0.019945	0.051371	0.985559	1102	3	1.8115
	SEMA4D	5	0.0094937	0.033924	0.705377	863	2	1.2311	0.012081	0.047086	0.752963	1103	3	1.2311		ACO1	3	0.98002	0.98012	0.999665	18582	0	1.7546	0.019983	0.051474	0.985559	1103	3	1.7546
	BAG3	5	0.98792	0.98799	1	17484	0	0.53873	0.012084	0.047094	0.752963	1104	5	0.53873		PTCD3	3	0.97996	0.98007	0.999665	18580	0	1.7692	0.020036	0.051605	0.985559	1104	3	1.7692
	ZBTB42	5	0.9879	0.98797	1	17483	0	0.61678	0.012105	0.047164	0.753156	1105	5	0.61678		NRIP3	3	0.87737	0.87744	0.999665	16641	0	0.9838	0.020054	0.051654	0.985559	1105	3	0.9838
	CYP27C1	5	0.21359	0.39383	1	6829	2	-0.24456	0.012113	0.04719	0.753156	1106	2	-0.24456		POP7	3	0.97993	0.98003	0.999665	18577	0	1.5721	0.020074	0.051705	0.985559	1106	3	1.5721
	NBR1	5	0.89347	0.89391	1	15485	0	0.85875	0.012147	0.047319	0.75374	1107	4	0.85875		C11orf31	3	0.014775	0.038759	0.962523	820	1	1.6283	0.020096	0.051761	0.985559	1107	2	1.6283
	JAGN1	5	0.98782	0.98789	1	17480	0	0.86095	0.012178	0.04742	0.75415	1108	5	0.86095		DDX41	3	0.26362	0.39216	0.994188	7761	1	2.6001	0.020113	0.051812	0.985559	1108	2	2.6001
	ADAMTS9	5	0.11025	0.23923	0.988959	4328	1	1.0443	0.012201	0.047507	0.754865	1109	4	1.0443		MSANTD2	3	0.97946	0.97959	0.999665	18567	0	1.9193	0.020138	0.051868	0.985559	1109	3	1.9193
	ADM2	5	0.9535	0.9537	1	16644	0	0.93997	0.012241	0.047648	0.755757	1110	3	0.93997		TLR6	3	0.97983	0.97995	0.999665	18576	0	1.2996	0.020169	0.051955	0.985559	1110	3	1.2996
	ITPKB	5	0.84785	0.85073	1	14672	1	0.84744	0.012249	0.047673	0.755757	1111	4	0.84744		LRP5L	6	0.19447	0.386	0.993744	6125	2	1.6537	0.0202	0.082453	0.985559	1111	4	1.6537
	SENP7	5	0.96292	0.96312	1	16863	0	1.0635	0.012253	0.047689	0.755757	1112	4	1.0635		HIF1A	6	0.11927	0.2848	0.991358	4306	1	1.1828	0.020221	0.082516	0.985559	1112	5	1.1828
	DISP1	5	0.43434	0.58811	1	10060	2	-0.11063	0.012263	0.047732	0.75578	1113	2	-0.11063		KCNT2	3	0.23561	0.35775	0.992088	7089	1	1.6314	0.020222	0.0521	0.985559	1113	2	1.6314
	TNR	5	0.64471	0.73295	1	12430	1	1.0956	0.012334	0.047977	0.756706	1114	4	1.0956		ARIH2	3	0.97974	0.97984	0.999665	18573	0	1.6611	0.020264	0.052212	0.985559	1114	3	1.6611
	CLCA2	5	0.90823	0.90859	1	15755	0	0.46788	0.012336	0.047988	0.756706	1115	4	0.46788		CCDC109B	3	0.84271	0.8427	0.999665	16056	0	1.0978	0.020265	0.052213	0.985559	1115	2	1.0978
	HTR7	5	0.050729	0.14211	0.926752	2712	2	0.95681	0.012358	0.048071	0.756706	1116	3	0.95681		PHKG2	3	0.9797	0.97981	0.999665	18572	0	1.4353	0.020296	0.052283	0.985559	1116	3	1.4353
	TYK2	4	0.98763	0.98771	1	17475	0	0.85628	0.012369	0.040809	0.719319	1117	4	0.85628		CTRC	3	0.54438	0.58167	0.999665	11458	1	1.2408	0.020307	0.052313	0.985559	1117	2	1.2408
	TADA3	5	0.98763	0.9877	1	17474	0	0.80743	0.012374	0.048118	0.756706	1118	5	0.80743		AMY2B	3	0.97965	0.97976	0.999665	18571	0	1.5227	0.020347	0.052414	0.985559	1118	3	1.5227
	GABARAPL1	5	0.74349	0.78055	1	13333	1	0.93361	0.012375	0.048122	0.756706	1119	4	0.93361		PRR21	3	0.54953	0.58517	0.999665	11509	1	2.1867	0.020349	0.052418	0.985559	1119	2	2.1867
	CORT	4	0.74601	0.75329	1	13353	1	0.56847	0.012379	0.040828	0.719319	1120	2	0.56847		TMEM208	3	0.90446	0.90451	0.999665	17158	0	0.83863	0.020391	0.052533	0.985559	1120	3	0.83863
	LRRC29	5	0.98762	0.9877	1	17473	0	0.33369	0.012379	0.048136	0.756706	1121	5	0.33369		WBSCR17	3	0.97957	0.97969	0.999665	18569	0	1.6471	0.02043	0.052624	0.985559	1121	3	1.6471
	DRD2	5	0.93369	0.9339	1	16263	0	0.18471	0.012392	0.048191	0.756706	1122	3	0.18471		MS4A8	3	0.78428	0.78433	0.999665	15065	0	2.4681	0.020433	0.052632	0.985559	1122	2	2.4681
	ZDHHC16	5	0.9876	0.98768	1	17471	0	0.70853	0.012404	0.048235	0.756706	1123	5	0.70853		CYTL1	3	0.62964	0.64369	0.999665	12591	1	0.98589	0.020518	0.052838	0.985559	1123	2	0.98589
	FBXL14	5	0.23305	0.41673	1	7191	2	0.28532	0.01241	0.048253	0.756706	1124	3	0.28532		TMEM237	6	0.89197	0.90033	0.999665	16918	1	1.576	0.020538	0.083443	0.985559	1124	4	1.576
	SAA1	3	0.98758	0.98772	1	17469	0	1.0799	0.012421	0.032874	0.687371	1125	3	1.0799		CTSG	3	0.18368	0.29314	0.991358	5861	1	0.033911	0.02056	0.052945	0.985559	1125	1	0.033911
	MMP23B	5	0.88016	0.88059	1	15241	0	0.95683	0.012441	0.048375	0.757645	1126	3	0.95683		NAA16	3	0.97941	0.97954	0.999665	18566	0	1.6712	0.02059	0.053021	0.985559	1126	3	1.6712
	C1orf52	5	0.0047419	0.019846	0.602319	585	2	0.34275	0.012447	0.048397	0.757645	1127	3	0.34275		SETD3	3	0.59664	0.61875	0.999665	12109	1	2.678	0.020618	0.053079	0.985559	1127	2	2.678
	DYNC1H1	5	0.98751	0.98759	1	17468	0	0.79518	0.012488	0.048544	0.758788	1128	5	0.79518		PRSS12	3	0.97934	0.97949	0.999665	18565	0	1.8227	0.020657	0.053176	0.985559	1128	3	1.8227
	MEF2B	5	0.073289	0.17975	0.952873	3367	1	0.91101	0.012492	0.048554	0.758788	1129	4	0.91101		MST1R	3	0.97929	0.97943	0.999665	18564	0	1.4651	0.020709	0.053319	0.985559	1129	3	1.4651
	KCNB2	5	0.71066	0.76339	1	12998	1	0.67752	0.012559	0.048786	0.760745	1130	4	0.67752		HPCAL4	6	0.15578	0.3389	0.991358	5196	3	0.096098	0.020713	0.083961	0.985559	1130	3	0.096098
	SIAH2	5	0.55676	0.69763	1	11751	1	0.72435	0.012564	0.048809	0.760745	1131	4	0.72435		TRIM67	3	0.36974	0.47522	0.997083	9389	1	2.3594	0.020718	0.053345	0.985559	1131	2	2.3594
	HPS6	5	0.42529	0.58011	1	9937	1	0.85462	0.012593	0.048926	0.760862	1132	3	0.85462		MIPEP	3	0.63791	0.65025	0.999665	12706	1	2.7842	0.020751	0.053428	0.985559	1132	2	2.7842
	BBS7	5	0.73655	0.77676	1	13250	1	0.68022	0.012639	0.049098	0.760862	1133	3	0.68022		ERAP1	6	0.40846	0.61705	0.999665	9862	1	1.5708	0.020752	0.084073	0.985559	1133	5	1.5708
	SCD5	5	0.98735	0.98741	1	17466	0	0.74369	0.012651	0.049137	0.760862	1134	5	0.74369		TRPM2	3	0.55535	0.58917	0.999665	11594	1	2.5546	0.020765	0.053462	0.985559	1134	2	2.5546
	TIFAB	5	0.98734	0.9874	1	17465	0	0.50243	0.012665	0.049188	0.760862	1135	5	0.50243		BZRAP1	3	0.97921	0.97935	0.999665	18563	0	1.7714	0.02079	0.05353	0.985559	1135	3	1.7714
	PDLIM5	14	0.51827	0.79352	1	11196	2	0.85171	0.012674	0.073959	0.821209	1136	9	0.85171		POLR1D	6	0.024228	0.085703	0.973851	1277	4	-1.5122	0.020797	0.084218	0.985559	1136	2	-1.5122
	DHCR24	5	0.96583	0.96603	1	16930	0	0.94918	0.0127	0.04932	0.760862	1137	4	0.94918		PGAM1	3	0.97918	0.97933	0.999665	18561	0	1.3148	0.020815	0.053595	0.985559	1137	3	1.3148
	VWA5A	4	0.9873	0.98738	1	17464	0	0.65882	0.012701	0.041839	0.725648	1138	4	0.65882		LPCAT1	3	0.97916	0.9793	0.999665	18560	0	1.2207	0.020841	0.053655	0.985559	1138	3	1.2207
	LURAP1	5	0.086596	0.20146	0.965386	3720	1	0.73652	0.012727	0.049408	0.760862	1139	4	0.73652		NBPF20	3	0.97527	0.97544	0.999665	18479	0	2.5356	0.020858	0.053698	0.985559	1139	3	2.5356
	TACC3	5	0.14619	0.29483	1	5238	2	0.18269	0.012735	0.04944	0.760862	1140	2	0.18269		ARID3C	3	0.97913	0.97927	0.999665	18559	0	1.4462	0.020867	0.053718	0.985559	1140	3	1.4462
	PCDHGA1	5	0.5899	0.7109	1	12016	1	1.0678	0.012743	0.04946	0.760862	1141	4	1.0678		GLDC	3	0.97912	0.97926	0.999665	18558	0	1.5126	0.020877	0.053741	0.985559	1141	3	1.5126
	NOP9	5	0.90751	0.90787	1	15739	0	0.87211	0.012772	0.049574	0.760862	1142	3	0.87211		CYP4F11	3	0.55371	0.58804	0.999665	11569	1	0.24633	0.020939	0.053895	0.985559	1142	2	0.24633
	PLEKHF1	5	0.98722	0.98729	1	17463	0	0.65765	0.012778	0.049591	0.760862	1143	5	0.65765		PLEKHA4	3	0.88847	0.88855	0.999665	16840	0	1.9635	0.020981	0.05401	0.985559	1143	3	1.9635
	APOA4	5	0.96704	0.96725	1	16956	0	0.88621	0.012784	0.049613	0.760862	1144	4	0.88621		RAB43	11	0.93536	0.97115	0.999665	17735	2	1.1011	0.020983	0.10398	0.985559	1144	9	1.1011
	TIAL1	5	0.76629	0.79367	1	13597	1	1.2216	0.012786	0.049622	0.760862	1145	4	1.2216		C19orf80	3	0.97901	0.97916	0.999665	18556	0	1.1798	0.020987	0.054024	0.985559	1145	3	1.1798
	RNF144A	5	0.98721	0.98727	1	17462	0	0.32167	0.012795	0.049648	0.760862	1146	5	0.32167		REPIN1	6	0.59443	0.73931	0.999665	12089	1	1.4647	0.02101	0.084832	0.985559	1146	5	1.4647
	LRP5L	5	0.98385	0.98397	1	17369	0	0.92937	0.012809	0.049696	0.760862	1147	5	0.92937		PSD	9	0.96501	0.97066	0.999665	18280	1	0.94567	0.021016	0.099598	0.985559	1147	6	0.94567
	USP53	5	0.85684	0.85841	1	14815	1	0.10615	0.012817	0.049731	0.760862	1148	2	0.10615		EMC10	3	0.97895	0.9791	0.999665	18554	0	1.2892	0.021049	0.054153	0.985559	1148	3	1.2892
	CADM2	5	0.94195	0.94213	1	16431	0	1.0453	0.012821	0.049741	0.760862	1149	4	1.0453		NCK2	6	0.087828	0.22419	0.988233	3445	2	0.53099	0.021049	0.084958	0.985559	1149	4	0.53099
	ZNF211	5	0.08555	0.19973	0.965386	3688	1	0.92163	0.012834	0.049788	0.760862	1150	4	0.92163		FAM71E1	3	0.9467	0.94689	0.999665	17927	0	2.8565	0.02106	0.054188	0.985559	1150	3	2.8565
	HK3	5	0.98716	0.98723	1	17459	0	0.70299	0.012845	0.04983	0.760862	1151	5	0.70299		APOBEC3H	3	0.69409	0.69703	0.999665	13553	1	0.15387	0.021065	0.054202	0.985559	1151	1	0.15387
	PXDN	5	0.98715	0.98723	1	17458	0	0.47175	0.012847	0.049836	0.760862	1152	5	0.47175		IL3RA	3	0.8623	0.86228	0.999665	16387	0	1.9879	0.021107	0.054306	0.985559	1152	2	1.9879
	KLC4	5	0.90385	0.90422	1	15676	0	0.39045	0.012893	0.049995	0.761005	1153	4	0.39045		ODAM	3	0.18539	0.29537	0.991358	5901	1	0.35889	0.021107	0.054307	0.985559	1153	2	0.35889
	NUPR1	7	0.80533	0.87164	1	14047	1	0.65819	0.012905	0.057022	0.777235	1154	4	0.65819		CITED2	9	0.51065	0.7421	0.999665	11054	3	0.48273	0.021127	0.10004	0.985559	1154	6	0.48273
	MMP13	5	0.25482	0.43487	1	7488	1	0.89409	0.012933	0.050129	0.761005	1155	4	0.89409		PSMD2	6	0.52936	0.69468	0.999665	11286	2	0.24144	0.021133	0.085203	0.985559	1155	3	0.24144
	PTPN3	5	0.95783	0.95801	1	16733	0	0.87723	0.01294	0.050162	0.761005	1156	4	0.87723		LRTOMT	3	0.97879	0.97893	0.999665	18552	0	1.4731	0.021212	0.054558	0.985559	1156	3	1.4731
	OSR1	5	0.76066	0.79035	1	13515	1	0.72513	0.012942	0.050168	0.761005	1157	4	0.72513		ANKRD20A3	3	0.97875	0.9789	0.999665	18550	0	1.4102	0.021245	0.054638	0.985559	1157	3	1.4102
	HOXD11	5	0.55697	0.6978	1	11757	1	0.4675	0.012948	0.050193	0.761005	1158	3	0.4675		IGSF22	3	0.58639	0.61112	0.999665	11988	1	0.3038	0.021276	0.054712	0.985559	1158	2	0.3038
	MAGED2	5	0.98705	0.98713	1	17457	0	0.62894	0.012954	0.050218	0.761005	1159	5	0.62894		ANGPT2	3	0.97871	0.97885	0.999665	18548	0	1.1854	0.021294	0.054758	0.985559	1159	3	1.1854
	ADSS	3	0.66643	0.66916	1	12601	1	1.5521	0.012982	0.034289	0.697165	1160	2	1.5521		GLE1	3	0.092552	0.17572	0.983159	3586	1	1.4861	0.02136	0.054908	0.985559	1160	2	1.4861
	CORO7	5	0.98701	0.9871	1	17456	0	0.57366	0.012985	0.050321	0.761922	1161	5	0.57366		C1orf137	3	0.93914	0.93934	0.999665	17808	0	2.8616	0.021364	0.054914	0.985559	1161	3	2.8616
	CYSTM1	5	0.40657	0.56401	1	9655	1	0.74886	0.013012	0.050409	0.762135	1162	4	0.74886		GSK3B	3	0.97862	0.97877	0.999665	18547	0	2.4144	0.021377	0.054947	0.985559	1162	3	2.4144
	P4HB	5	0.071224	0.17634	0.950186	3308	1	0.9794	0.013014	0.05042	0.762135	1163	4	0.9794		PI4KB	5	0.97861	0.97873	0.999665	18546	0	0.54585	0.021386	0.079037	0.985559	1163	5	0.54585
	IKZF2	5	0.80731	0.82005	1	14076	1	1.0418	0.013049	0.050549	0.762135	1164	4	1.0418		NDFIP1	3	0.97861	0.97875	0.999665	18545	0	2.5577	0.02139	0.054981	0.985559	1164	3	2.5577
	NLGN2	5	0.18273	0.34925	1	6095	1	1.1496	0.013057	0.050575	0.762135	1165	3	1.1496		DCC	3	0.97226	0.97242	0.999665	18421	0	2.6298	0.021432	0.05509	0.985559	1165	3	2.6298
	TMIGD1	5	0.92302	0.92332	1	16055	0	0.94377	0.013125	0.050803	0.762135	1166	3	0.94377		IL36B	3	0.0077827	0.021076	0.962523	430	2	-2.5405	0.021444	0.055122	0.985559	1166	1	-2.5405
	ENHO	5	0.98687	0.98695	1	17455	0	0.79772	0.013129	0.050819	0.762135	1167	5	0.79772		OR4C11	3	0.6197	0.636	0.999665	12440	1	2.6826	0.021453	0.055142	0.985559	1167	2	2.6826
	C20orf196	4	0.032411	0.084868	0.849297	1966	1	1.1338	0.013155	0.043242	0.734913	1168	3	1.1338		LRRC32	6	0.4158	0.62165	0.999665	9947	2	0.32889	0.021482	0.086236	0.985559	1168	3	0.32889
	C22orf42	5	0.98684	0.98691	1	17454	0	0.47008	0.01316	0.050942	0.762135	1169	5	0.47008		MAP1A	3	0.92541	0.92549	0.999665	17530	0	2.8699	0.021486	0.055222	0.985559	1169	3	2.8699
	PFAS	5	0.98683	0.98691	1	17453	0	0.79448	0.013169	0.050974	0.762135	1170	5	0.79448		SYT2	6	0.47873	0.66151	0.999665	10664	2	1.5645	0.02149	0.086262	0.985559	1170	4	1.5645
	ITSN2	5	0.377	0.53831	1	9237	1	0.15464	0.013171	0.05098	0.762135	1171	2	0.15464		PRLH	3	0.97848	0.97862	0.999665	18542	0	1.9634	0.021515	0.055294	0.985559	1171	3	1.9634
	CHRND	5	0.98681	0.98689	1	17452	0	0.47058	0.013192	0.051053	0.762135	1172	5	0.47058		JRK	3	0.072623	0.14932	0.983159	3011	1	2.055	0.021529	0.055327	0.985559	1172	2	2.055
	TCF7	4	0.98681	0.98688	1	17451	0	0.8252	0.013195	0.043363	0.734913	1173	4	0.8252		PTPRE	6	0.85137	0.8771	0.999665	16202	1	1.0026	0.021553	0.086445	0.985559	1173	4	1.0026
	PBLD	5	0.86001	0.86122	1	14876	1	0.74895	0.013195	0.051065	0.762135	1174	4	0.74895		TAF1D	3	0.055369	0.12628	0.974719	2556	1	3.2098	0.021562	0.055393	0.985559	1174	2	3.2098
	PSMD8	5	0.5264	0.66991	1	11305	2	0.60761	0.013226	0.051186	0.762135	1175	3	0.60761		TNFRSF14	3	0.81005	0.80995	0.999665	15522	0	0.28978	0.021571	0.055419	0.985559	1175	2	0.28978
	SCT	5	0.95238	0.95257	1	16626	0	0.66898	0.013235	0.051209	0.762135	1176	4	0.66898		IL12RB1	6	0.37149	0.58856	0.999665	9410	2	0.61188	0.021637	0.086697	0.985559	1176	3	0.61188
	STYXL1	5	0.98676	0.98685	1	17450	0	0.61619	0.013236	0.051213	0.762135	1177	5	0.61619		DPP3	3	0.97836	0.9785	0.999665	18540	0	1.2729	0.021641	0.055585	0.985559	1177	3	1.2729
	CHD7	5	0.81775	0.82753	1	14227	1	0.6986	0.01324	0.051224	0.762135	1178	4	0.6986		YY1	3	0.97835	0.97849	0.999665	18539	0	1.5565	0.021654	0.055621	0.985559	1178	3	1.5565
	ZNF347	5	0.82548	0.83311	1	14339	1	1.3264	0.013278	0.051365	0.762396	1179	4	1.3264		C17orf62	6	0.96963	0.96977	0.999665	18378	0	1.5604	0.021672	0.086803	0.985559	1179	5	1.5604
	SLC8A3	11	0.99834	0.99831	1	17837	0	0.33786	0.013278	0.070342	0.814444	1180	9	0.33786		SLC24A4	9	0.96641	0.97142	0.999665	18312	1	0.32821	0.021684	0.10218	0.985559	1180	6	0.32821
	SMCO4	3	0.98672	0.98686	1	17449	0	0.87493	0.01328	0.035036	0.697929	1181	3	0.87493		CHRNA10	3	0.97831	0.97845	0.999665	18538	0	1.708	0.021691	0.05571	0.985559	1181	3	1.708
	TENC1	5	0.98668	0.98676	1	17447	0	0.45519	0.013316	0.051488	0.762396	1182	5	0.45519		LGALS13	3	0.33521	0.45643	0.996866	8983	1	0.51435	0.021697	0.055727	0.985559	1182	2	0.51435
	ARL13B	5	0.80773	0.82035	1	14082	1	1.3225	0.013318	0.051498	0.762396	1183	4	1.3225		FZD3	3	0.97829	0.97843	0.999665	18537	0	2.5936	0.021714	0.055769	0.985559	1183	3	2.5936
	SMIM15	5	0.98666	0.98674	1	17446	0	0.53234	0.013342	0.051582	0.762396	1184	5	0.53234		SNAPC3	3	0.97823	0.97838	0.999665	18536	0	2.7476	0.021771	0.055909	0.985559	1184	3	2.7476
	TMEM106A	4	0.98661	0.98667	1	17445	0	0.86	0.013385	0.043966	0.736838	1185	4	0.86		COL4A6	6	0.64946	0.77895	0.999665	12887	2	0.22048	0.021787	0.087133	0.985559	1185	3	0.22048
	APOO	5	0.51179	0.6567	1	11119	1	0.64484	0.013393	0.051757	0.762396	1186	3	0.64484		BAMBI	3	0.26205	0.3903	0.994188	7723	1	0.2343	0.021823	0.056031	0.985559	1186	2	0.2343
	CCDC37	5	0.9866	0.98669	1	17444	0	0.56576	0.013403	0.051784	0.762396	1187	5	0.56576		ST20	6	0.93907	0.93906	0.999665	17805	0	1.64	0.021834	0.087276	0.985559	1187	5	1.64
	LHPP	5	0.98659	0.98669	1	17443	0	0.5755	0.013407	0.05179	0.762396	1188	5	0.5755		EDC3	3	0.97816	0.97831	0.999665	18534	0	2.4696	0.021837	0.05606	0.985559	1188	3	2.4696
	C2orf62	5	0.95159	0.95178	1	16607	0	0.9404	0.013408	0.051795	0.762396	1189	4	0.9404		MESDC2	3	0.97814	0.97828	0.999665	18533	0	1.4532	0.021864	0.056118	0.985559	1189	3	1.4532
	DTX3	5	0.95108	0.95127	1	16597	0	0.73607	0.013428	0.051868	0.762396	1190	4	0.73607		SLA2	3	0.9781	0.97824	0.999665	18532	0	1.7001	0.021897	0.056211	0.985559	1190	3	1.7001
	SEPT3	5	0.98657	0.98667	1	17442	0	0.5476	0.013432	0.051883	0.762396	1191	5	0.5476		UBE2D1	3	0.9781	0.97824	0.999665	18531	0	1.6514	0.021904	0.056224	0.985559	1191	3	1.6514
	GATAD2A	5	0.96396	0.96416	1	16882	0	1.0734	0.013445	0.051933	0.762396	1192	4	1.0734		ZNF468	3	0.97806	0.9782	0.999665	18530	0	2.018	0.021941	0.056318	0.985559	1192	3	2.018
	SELRC1	5	0.694	0.75519	1	12837	1	1.3336	0.013449	0.05195	0.762396	1193	4	1.3336		CYP4A22	3	0.97804	0.97818	0.999665	18529	0	1.6104	0.021961	0.056366	0.985559	1193	3	1.6104
	EMX1	5	0.97497	0.97514	1	17132	0	0.87104	0.013457	0.051981	0.762396	1194	5	0.87104		TUSC2	3	0.92905	0.92917	0.999665	17599	0	2.25	0.021979	0.056407	0.985559	1194	3	2.25
	GADD45B	5	0.98653	0.98663	1	17441	0	0.59952	0.013469	0.052022	0.762396	1195	5	0.59952		TRAPPC5	3	0.40082	0.49253	0.997083	9770	1	2.7046	0.02202	0.056508	0.985559	1195	2	2.7046
	TMEM68	3	0.98651	0.98665	1	17440	0	0.89414	0.013493	0.035553	0.697929	1196	3	0.89414		ZBTB42	3	0.24379	0.36783	0.992996	7291	1	3.0214	0.022041	0.056549	0.985559	1196	2	3.0214
	ARID3A	5	0.91614	0.91641	1	15924	0	1.3187	0.013495	0.052098	0.762396	1197	4	1.3187		SOCS4	3	0.97796	0.97811	0.999665	18528	0	2.0585	0.022042	0.056552	0.985559	1197	3	2.0585
	FAM76B	4	0.9865	0.98657	1	17439	0	0.72842	0.013497	0.044316	0.736838	1198	4	0.72842		ANXA4	3	0.0093497	0.025129	0.962523	513	1	1.5163	0.022076	0.056627	0.985559	1198	2	1.5163
	GPATCH3	5	0.74604	0.78201	1	13354	1	0.69238	0.013502	0.052127	0.762396	1199	4	0.69238		ZNF197	3	0.9779	0.97805	0.999665	18527	0	2.0085	0.022095	0.056672	0.985559	1199	3	2.0085
	HHIPL2	5	0.9865	0.9866	1	17438	0	0.56763	0.013503	0.052131	0.762396	1200	5	0.56763		DHRS11	3	0.23959	0.36266	0.992088	7189	2	-0.55345	0.022118	0.056727	0.985559	1200	1	-0.55345
	PLIN3	5	0.94273	0.9429	1	16447	0	1.0816	0.013527	0.052212	0.762959	1201	3	1.0816		SSX4B	2	0.97781	0.97768	0.999665	18525	0	1.8689	0.022193	0.041133	0.976916	1201	2	1.8689
	ZNF536	5	0.77727	0.8004	1	13723	1	-0.074893	0.01356	0.052316	0.763407	1202	2	-0.074893		MRGPRG	3	0.97779	0.97793	0.999665	18524	0	1.7113	0.022213	0.056953	0.985559	1202	3	1.7113
	PGBD2	5	0.98644	0.98654	1	17435	0	0.63387	0.013563	0.052327	0.763407	1203	5	0.63387		LTF	6	0.96697	0.96714	0.999665	18326	0	1.7851	0.022238	0.088451	0.985559	1203	4	1.7851
	TEKT4	3	0.98643	0.98658	1	17434	0	1.0577	0.013568	0.035724	0.697929	1204	3	1.0577		KLRC4	3	0.082865	0.16302	0.983159	3294	2	-1.7943	0.022244	0.057025	0.985559	1204	1	-1.7943
	TMPRSS2	5	0.98636	0.98646	1	17433	0	0.51579	0.01364	0.052583	0.764145	1205	5	0.51579		LCE3D	3	0.88584	0.8859	0.999665	16800	0	2.354	0.022255	0.057048	0.985559	1205	3	2.354
	ANKRD2	5	0.016338	0.053496	0.774463	1220	2	-0.012739	0.013642	0.052594	0.764145	1206	2	-0.012739		CLEC18B	3	0.97772	0.97786	0.999665	18523	0	1.137	0.022284	0.057121	0.985559	1206	3	1.137
	CMTR2	5	0.94958	0.94975	1	16565	0	2.0074	0.013648	0.052609	0.764145	1207	4	2.0074		FAM216B	3	0.56408	0.59521	0.999665	11712	1	1.3535	0.022286	0.057125	0.985559	1207	2	1.3535
	TACR3	5	0.21544	0.39639	1	6864	1	0.86116	0.013649	0.052619	0.764145	1208	4	0.86116		PAX6	12	0.63418	0.85233	0.999665	12654	3	1.4085	0.022313	0.11495	0.985559	1208	8	1.4085
	IL1F10	5	0.98635	0.98645	1	17432	0	0.4061	0.013653	0.052632	0.764145	1209	5	0.4061		TAS2R16	3	0.20919	0.3252	0.991358	6449	2	-0.37732	0.022329	0.057221	0.985559	1209	1	-0.37732
	FGF23	5	0.72498	0.77068	1	13130	1	0.82013	0.01369	0.052775	0.765138	1210	4	0.82013		CDKN2D	3	0.97767	0.97782	0.999665	18522	0	1.7611	0.022332	0.057226	0.985559	1210	3	1.7611
	DNAJC14	5	0.46242	0.6127	1	10441	2	-0.013677	0.013727	0.052898	0.766148	1211	2	-0.013677		IFIT5	3	0.97765	0.97781	0.999665	18521	0	1.5701	0.022349	0.057266	0.985559	1211	3	1.5701
	RPAP1	5	0.5034	0.6492	1	10999	1	1.5999	0.013743	0.052959	0.766415	1212	3	1.5999		DNASE1L1	6	0.48845	0.66774	0.999665	10783	1	1.3667	0.022368	0.088844	0.985559	1212	5	1.3667
	CLPTM1L	5	0.98622	0.98633	1	17430	0	0.76674	0.013777	0.053084	0.767101	1213	5	0.76674		GIPR	3	0.54749	0.58377	0.999665	11490	1	1.2256	0.022371	0.05732	0.985559	1213	2	1.2256
	TMEM71	5	0.54833	0.68982	1	11621	2	0.94501	0.013783	0.053112	0.767101	1214	3	0.94501		OR51M1	3	0.97762	0.97777	0.999665	18520	0	1.1581	0.022383	0.05735	0.985559	1214	3	1.1581
	BRWD1	5	0.95663	0.95684	1	16705	0	0.95021	0.013798	0.053167	0.767101	1215	4	0.95021		GRIK5	3	0.97758	0.97773	0.999665	18519	0	1.3536	0.022423	0.057439	0.985559	1215	3	1.3536
	FITM1	5	0.98616	0.98626	1	17429	0	0.76437	0.013839	0.053314	0.767101	1216	5	0.76437		RCAN2	9	0.063377	0.20605	0.986294	2790	5	-0.38252	0.022467	0.10533	0.985559	1216	4	-0.38252
	SLC17A8	5	0.9767	0.97686	1	17167	0	1.1622	0.013846	0.053335	0.767101	1217	5	1.1622		ACTN1	3	0.13132	0.22614	0.988233	4625	1	2.9717	0.022491	0.057607	0.985559	1217	2	2.9717
	SMDT1	5	0.94512	0.9453	1	16486	0	1.0101	0.013849	0.053347	0.767101	1218	4	1.0101		WDR24	3	0.97748	0.97764	0.999665	18518	0	1.4502	0.022515	0.057661	0.985559	1218	3	1.4502
	GYPE	1	0.98611	0.98613	1	17428	0	3.6595	0.013893	0.013744	0.52599	1219	1	3.6595		PDCL2	3	0.97747	0.97763	0.999665	18517	0	1.5023	0.022525	0.05768	0.985559	1219	3	1.5023
	ZNF217	5	0.96565	0.96586	1	16923	0	0.77999	0.013897	0.053523	0.769018	1220	4	0.77999		RPE	3	0.97745	0.97761	0.999665	18516	0	1.1031	0.022546	0.057726	0.985559	1220	3	1.1031
	TMEM39A	5	0.92604	0.9263	1	16110	0	1.0151	0.013919	0.053601	0.769526	1221	3	1.0151		ZNF839	9	0.33517	0.59707	0.999665	8982	3	1.1009	0.02255	0.10565	0.985559	1221	5	1.1009
	RAP2B	4	0.96592	0.9658	1	16933	0	0.84087	0.013963	0.045742	0.74665	1222	4	0.84087		PHC3	3	0.059957	0.13245	0.978831	2694	2	-1.6972	0.022581	0.057812	0.985559	1222	1	-1.6972
	TSGA10	5	0.84767	0.85059	1	14668	1	0.22706	0.013966	0.053754	0.771106	1223	3	0.22706		VCX	3	0.92762	0.92773	0.999665	17566	0	2.5278	0.022588	0.057828	0.985559	1223	3	2.5278
	C1QTNF5	5	0.98118	0.98134	1	17297	0	0.86104	0.014	0.053868	0.771158	1224	5	0.86104		MATN2	3	0.08351	0.16387	0.983159	3316	1	2.2311	0.022595	0.057844	0.985559	1224	2	2.2311
	SERF2	8	0.45202	0.6727	1	10303	1	0.64529	0.014017	0.065131	0.803724	1225	6	0.64529		TTC5	3	0.12296	0.21532	0.988233	4396	2	-0.65047	0.022623	0.057917	0.985559	1225	1	-0.65047
	C2orf57	5	0.72658	0.77149	1	13148	1	0.82147	0.014036	0.053987	0.771158	1226	4	0.82147		TMEM68	6	0.97233	0.97237	0.999665	18422	0	0.99325	0.022653	0.089648	0.985559	1226	5	0.99325
	MID2	5	0.76209	0.79121	1	13549	1	0.91339	0.014042	0.054007	0.771158	1227	3	0.91339		WDR83	6	0.25004	0.45135	0.996744	7443	2	0.19703	0.022727	0.089882	0.985559	1227	3	0.19703
	PIK3R2	5	0.98596	0.98607	1	17427	0	0.78348	0.014043	0.054015	0.771158	1228	5	0.78348		C1QTNF8	3	0.10388	0.19057	0.983159	3919	1	2.113	0.022741	0.058231	0.985559	1228	2	2.113
	STK24	5	0.48318	0.63111	1	10742	2	1.0273	0.014086	0.05417	0.77118	1229	3	1.0273		DGKZ	12	0.0078161	0.043282	0.962523	431	5	0.24783	0.02278	0.11697	0.985559	1229	6	0.24783
	POLR2G	5	0.9859	0.98602	1	17426	0	1.4076	0.014097	0.054212	0.77118	1230	5	1.4076		CYCS	3	0.011387	0.030301	0.962523	629	1	0.39898	0.022791	0.058347	0.985559	1230	2	0.39898
	CTDP1	5	0.96452	0.9647	1	16890	0	1.1632	0.014117	0.054273	0.77118	1231	4	1.1632		RIMKLA	3	0.90895	0.90902	0.999665	17234	0	2.9478	0.022825	0.058441	0.985559	1231	3	2.9478
	GALNT7	5	0.21683	0.39837	1	6896	1	0.67865	0.014129	0.054313	0.77118	1232	4	0.67865		ECSIT	6	0.87216	0.88824	0.999665	16555	1	1.201	0.022843	0.090215	0.985559	1232	5	1.201
	BRF1	13	0.5357	0.79514	1	11437	3	0.78952	0.01413	0.07835	0.828733	1233	9	0.78952		CYP2C9	3	0.58496	0.61007	0.999665	11967	1	2.2634	0.022846	0.058492	0.985559	1233	2	2.2634
	ICAM3	5	0.96187	0.96205	1	16842	0	0.85794	0.014138	0.054348	0.77118	1234	3	0.85794		SPDL1	3	0.97711	0.97729	0.999665	18514	0	1.9488	0.022885	0.058586	0.985559	1234	3	1.9488
	RSPO1	5	0.98586	0.98597	1	17423	0	0.56401	0.014144	0.054365	0.77118	1235	5	0.56401		ESX1	3	0.87517	0.87527	0.999665	16602	0	2.1144	0.022909	0.05864	0.985559	1235	3	2.1144
	FAM151A	5	0.70604	0.7611	1	12943	1	0.47586	0.014172	0.054467	0.77118	1236	4	0.47586		RBM4B	3	0.97705	0.97722	0.999665	18513	0	1.2756	0.022947	0.05872	0.985559	1236	3	1.2756
	NEIL2	5	0.98582	0.98594	1	17422	0	0.74258	0.014179	0.054502	0.77118	1237	5	0.74258		HGC6.3	3	0.87827	0.87836	0.999665	16658	0	1.0606	0.02296	0.058755	0.985559	1237	3	1.0606
	AKAP3	5	0.94262	0.9428	1	16445	0	1.1603	0.014183	0.054513	0.77118	1238	3	1.1603		DSCAM	3	0.67999	0.68472	0.999665	13330	1	3.6103	0.023044	0.058946	0.985559	1238	2	3.6103
	TINAG	5	0.9655	0.9657	1	16917	0	0.97555	0.014193	0.054542	0.77118	1239	4	0.97555		CREB5	12	0.56031	0.80869	0.999665	11666	2	0.83921	0.023056	0.11819	0.985559	1239	9	0.83921
	CC2D2B	5	0.27526	0.45204	1	7758	2	-0.18957	0.014227	0.054658	0.77118	1240	1	-0.18957		PNLDC1	3	0.78969	0.78979	0.999665	15162	0	2.2186	0.023106	0.059095	0.985559	1240	2	2.2186
	ARHGEF17	5	0.45905	0.60977	1	10388	1	0.67817	0.01423	0.054667	0.77118	1241	4	0.67817		HIST1H1C	3	0.25434	0.38091	0.993744	7539	2	-0.37895	0.023128	0.059151	0.985559	1241	1	-0.37895
	PCDH12	5	0.98572	0.98584	1	17421	0	0.4695	0.014276	0.054816	0.771964	1242	5	0.4695		KCNRG	3	0.97685	0.97703	0.999665	18512	0	1.0474	0.023148	0.059194	0.985559	1242	3	1.0474
	TNFRSF19	5	0.32288	0.49195	1	8462	2	0.93619	0.014286	0.05485	0.771964	1243	3	0.93619		RSRP1	3	0.79682	0.79683	0.999665	15290	0	2.3274	0.023162	0.059224	0.985559	1243	2	2.3274
	GGACT	5	0.91326	0.91357	1	15865	0	0.4366	0.01431	0.054943	0.771964	1244	3	0.4366		TESK2	3	0.97683	0.97701	0.999665	18511	0	1.2164	0.023169	0.059239	0.985559	1244	3	1.2164
	SERPINA10	5	0.98569	0.9858	1	17420	0	0.48613	0.014314	0.05496	0.771964	1245	5	0.48613		EME2	3	0.97682	0.977	0.999665	18510	0	1.4106	0.023183	0.059281	0.985559	1245	3	1.4106
	RHBDF1	5	0.96298	0.96318	1	16865	0	0.71162	0.014318	0.054972	0.771964	1246	3	0.71162		GAN	3	0.40461	0.49471	0.997083	9814	1	1.7992	0.023212	0.059368	0.985559	1246	2	1.7992
	KIF22	4	0.68194	0.70661	1	12724	1	1.1131	0.014336	0.046919	0.752171	1247	3	1.1131		ZSCAN31	6	0.053747	0.15397	0.983159	2507	1	1.0891	0.023219	0.091302	0.985559	1247	4	1.0891
	TSPEAR	5	0.6944	0.75538	1	12842	1	0.85942	0.014354	0.055104	0.773215	1248	4	0.85942		CLASP1	3	0.30166	0.43842	0.995347	8615	1	2.9349	0.02324	0.059447	0.985559	1248	2	2.9349
	TM6SF2	5	0.7996	0.81473	1	13981	1	1.2554	0.014371	0.055162	0.773422	1249	4	1.2554		OR8B12	3	0.36205	0.47104	0.997083	9287	1	-0.12331	0.023254	0.05948	0.985559	1249	1	-0.12331
	IGSF9B	5	0.25923	0.43856	1	7543	2	0.22461	0.01445	0.055432	0.775773	1250	3	0.22461		HSPA2	3	0.33172	0.45459	0.996866	8939	1	-0.1319	0.023296	0.059574	0.985559	1250	1	-0.1319
	HSD17B12	4	0.011927	0.039466	0.739344	985	3	-1.9856	0.014472	0.047352	0.75374	1251	1	-1.9856		RNF123	3	0.41802	0.50253	0.997083	9969	1	2.1296	0.023303	0.059588	0.985559	1251	2	2.1296
	ANKRD9	5	0.96552	0.96571	1	16919	0	0.91692	0.014476	0.055524	0.775773	1252	4	0.91692		DPM1	1	0.97669	0.97674	0.999665	18508	0	3.8356	0.023309	0.023254	0.973885	1252	1	3.8356
	PSMD3	5	0.73301	0.77484	1	13215	1	0.95655	0.014483	0.055546	0.775773	1253	3	0.95655		APAF1	3	0.97047	0.97061	0.999665	18391	0	2.3254	0.023324	0.05963	0.985559	1253	3	2.3254
	C16orf13	5	0.98551	0.98563	1	17418	0	0.45486	0.014494	0.055578	0.775773	1254	5	0.45486		PUM2	6	0.23149	0.42958	0.99446	7001	1	1.5604	0.023327	0.091621	0.985559	1254	5	1.5604
	AQP5	5	0.41251	0.56914	1	9760	2	0.53765	0.014507	0.055635	0.775773	1255	3	0.53765		NAMPT	3	0.033524	0.08332	0.973383	1721	2	-0.86616	0.023338	0.059655	0.985559	1255	1	-0.86616
	C14orf164	5	0.26023	0.43938	1	7554	1	1.0498	0.014519	0.055683	0.775773	1256	3	1.0498		AADACL2	3	0.97665	0.97683	0.999665	18507	0	1.0925	0.023353	0.059688	0.985559	1256	3	1.0925
	FBXL5	5	0.98547	0.98559	1	17417	0	0.90354	0.014528	0.05571	0.775773	1257	5	0.90354		CDC42SE1	3	0.97664	0.97682	0.999665	18506	0	2.0778	0.023357	0.059697	0.985559	1257	3	2.0778
	NAV3	5	0.28644	0.46134	1	7921	2	0.25246	0.01453	0.055717	0.775773	1258	3	0.25246		KRBOX4	3	0.97664	0.97682	0.999665	18505	0	1.3799	0.023364	0.059716	0.985559	1258	3	1.3799
	MYH10	5	0.97445	0.97461	1	17116	0	1.0338	0.014561	0.055817	0.776264	1259	4	1.0338		CYP17A1	3	0.95258	0.95284	0.999665	18048	0	2.4879	0.023367	0.059724	0.985559	1259	3	2.4879
	PLA2R1	5	0.98543	0.98555	1	17416	0	0.6716	0.014566	0.055839	0.776264	1260	5	0.6716		RGL3	3	0.64725	0.65765	0.999665	12853	1	2.952	0.023388	0.059759	0.985559	1260	2	2.952
	HS3ST2	5	0.98156	0.9817	1	17307	0	0.59655	0.014631	0.056065	0.777235	1261	5	0.59655		CYP11B1	3	0.97657	0.97674	0.999665	18504	0	1.8974	0.023434	0.059876	0.985559	1261	3	1.8974
	USP12	3	0.77806	0.77813	1	13736	0	1.2822	0.014637	0.038447	0.707245	1262	2	1.2822		UGT2B10	3	0.97655	0.97673	0.999665	18503	0	1.5603	0.023448	0.059906	0.985559	1262	3	1.5603
	IGSF11	5	0.87715	0.87763	1	15184	1	0.92487	0.014644	0.056104	0.777235	1263	4	0.92487		CACTIN	3	0.77211	0.77234	0.999665	14861	0	0.49504	0.023465	0.059949	0.985559	1263	2	0.49504
	PEX13	4	0.91835	0.91809	1	15957	0	1.2861	0.014652	0.047893	0.756706	1264	3	1.2861		LRRC1	3	0.97334	0.97347	0.999665	18442	0	2.4243	0.023494	0.060025	0.985559	1264	3	2.4243
	MBOAT2	5	0.75711	0.78825	1	13477	1	0.60742	0.014681	0.056226	0.777235	1265	3	0.60742		ZNF223	3	0.97373	0.97386	0.999665	18452	0	1.8391	0.023507	0.060048	0.985559	1265	3	1.8391
	CNOT6L	5	0.33127	0.49918	1	8583	2	0.99409	0.014702	0.056301	0.777235	1266	3	0.99409		HUWE1	3	0.97649	0.97667	0.999665	18502	0	1.5023	0.023507	0.060049	0.985559	1266	3	1.5023
	SF3B3	5	0.98527	0.98538	1	17415	0	1.0649	0.014727	0.056387	0.777235	1267	5	1.0649		CAPN14	3	0.93851	0.93872	0.999665	17797	0	2.9084	0.02353	0.060105	0.985559	1267	3	2.9084
	PIK3R3	5	0.48666	0.63419	1	10779	2	0.14822	0.014727	0.056389	0.777235	1268	2	0.14822		AIM2	3	0.97646	0.97663	0.999665	18501	0	1.5191	0.023542	0.060131	0.985559	1268	3	1.5191
	NTF3	5	0.98524	0.98535	1	17414	0	0.6357	0.014756	0.056493	0.777235	1269	5	0.6357		GMFG	3	0.93238	0.9325	0.999665	17674	0	1.603	0.023633	0.060356	0.985559	1269	3	1.603
	TUSC1	5	0.98524	0.98535	1	17413	0	0.63553	0.014758	0.056504	0.777235	1270	5	0.63553		CRYGN	3	0.97632	0.97649	0.999665	18499	0	1.2739	0.023676	0.060478	0.985559	1270	3	1.2739
	EHBP1L1	5	0.84754	0.85048	1	14665	1	0.69647	0.014783	0.056594	0.777235	1271	3	0.69647		LCN10	3	0.51772	0.56392	0.997083	11147	1	2.4206	0.0237	0.060542	0.985559	1271	2	2.4206
	CELF6	5	0.81045	0.82224	1	14117	1	0.58719	0.014784	0.056599	0.777235	1272	4	0.58719		RBP2	3	0.029341	0.073822	0.962523	1539	2	-0.90248	0.023717	0.060575	0.985559	1272	1	-0.90248
	FAM43A	5	0.9852	0.98532	1	17411	0	0.39629	0.014802	0.056667	0.777235	1273	5	0.39629		RAP2C	6	0.45171	0.64422	0.999665	10356	2	0.14093	0.023733	0.092771	0.985559	1273	3	0.14093
	LCMT2	5	0.41015	0.56712	1	9723	2	0.83722	0.014832	0.056761	0.777235	1274	3	0.83722		UNC45A	6	0.22248	0.41911	0.994188	6770	2	0.66765	0.023734	0.092777	0.985559	1274	3	0.66765
	PADI3	5	0.66271	0.74074	1	12564	1	0.18738	0.014839	0.056783	0.777235	1275	3	0.18738		GNL3	3	0.97626	0.97643	0.999665	18498	0	1.7053	0.023743	0.06063	0.985559	1275	3	1.7053
	TRIP6	5	0.98515	0.98527	1	17409	0	0.50449	0.014847	0.056811	0.777235	1276	5	0.50449		FAF2	3	0.038985	0.0957	0.974719	1957	1	2.1315	0.023743	0.060631	0.985559	1276	2	2.1315
	WRAP73	5	0.98272	0.98282	1	17337	0	0.62686	0.014848	0.056814	0.777235	1277	5	0.62686		APBA3	3	0.40796	0.49665	0.997083	9853	1	0.98364	0.023759	0.060669	0.985559	1277	2	0.98364
	MN1	5	0.7732	0.79788	1	13678	1	0.5813	0.014856	0.056842	0.777235	1278	4	0.5813		LMNTD1	6	0.8451	0.87402	0.999665	16104	1	1.4467	0.023767	0.092857	0.985559	1278	5	1.4467
	BCLAF1	5	0.31207	0.48289	1	8297	2	2.4297	0.014864	0.056875	0.777235	1279	3	2.4297		CHIC1	3	0.96716	0.96735	0.999665	18330	0	2.7239	0.023786	0.060737	0.985559	1279	3	2.7239
	ALPI	5	0.75302	0.78591	1	13430	1	0.76876	0.014869	0.05689	0.777235	1280	4	0.76876		PLIN4	3	0.9486	0.94879	0.999665	17970	0	1.2497	0.023801	0.060767	0.985559	1280	3	1.2497
	CREB1	5	0.98511	0.98524	1	17408	0	0.67976	0.014886	0.056945	0.777235	1281	5	0.67976		LPPR3	3	0.91612	0.91616	0.999665	17360	0	2.607	0.023843	0.060879	0.985559	1281	3	2.607
	TAL2	5	0.15194	0.30365	1	5391	3	-0.40023	0.014888	0.056955	0.777235	1282	2	-0.40023		RILPL2	3	0.062181	0.13545	0.979332	2750	1	2.783	0.023857	0.060917	0.985559	1282	2	2.783
	CCDC120	5	0.60664	0.7174	1	12129	1	0.94249	0.014901	0.057007	0.777235	1283	4	0.94249		PODN	6	0.81943	0.86233	0.999665	15675	1	1.3938	0.023865	0.093167	0.985559	1283	5	1.3938
	RPUSD3	5	0.9851	0.98522	1	17407	0	0.36422	0.014903	0.057015	0.777235	1284	5	0.36422		CREG2	3	0.97612	0.97629	0.999665	18497	0	2.4992	0.023881	0.06098	0.985559	1284	3	2.4992
	RGS19	5	0.97726	0.97743	1	17187	0	0.66206	0.014907	0.057031	0.777235	1285	5	0.66206		SDC1	6	0.30534	0.51483	0.997083	8667	2	2.0501	0.023886	0.093223	0.985559	1285	4	2.0501
	BOLA1	5	0.98507	0.98518	1	17406	0	0.36434	0.014934	0.057123	0.777898	1286	5	0.36434		HNRNPLL	3	0.47954	0.53945	0.997083	10677	1	3.5481	0.023893	0.061002	0.985559	1286	2	3.5481
	MIER2	5	0.98504	0.98516	1	17405	0	0.77693	0.014963	0.057216	0.778575	1287	5	0.77693		SYNCRIP	10	0.70372	0.86821	0.999665	13702	3	0.7228	0.023919	0.11157	0.985559	1287	7	0.7228
	GUCY1A2	5	0.98501	0.98514	1	17403	0	0.74829	0.014987	0.057294	0.779056	1288	5	0.74829		DNHD1	3	0.97608	0.97625	0.999665	18495	0	1.422	0.023923	0.061078	0.985559	1288	3	1.422
	HIST2H3A	2	0.82009	0.81963	1	14257	0	1.6123	0.015022	0.028192	0.651765	1289	2	1.6123		HNRNPH1	4	0.53719	0.6424	0.999665	11372	1	1.4305	0.023926	0.075191	0.985559	1289	3	1.4305
	DIO2	5	0.98498	0.9851	1	17402	0	0.75205	0.015024	0.057414	0.779207	1290	5	0.75205		SPINK2	6	0.32499	0.53701	0.997083	8877	2	1.5044	0.023962	0.093441	0.985559	1290	4	1.5044
	WIBG	5	0.98496	0.98509	1	17401	0	0.6457	0.015036	0.057462	0.779207	1291	5	0.6457		GOLGA1	3	0.53775	0.5772	0.999665	11379	1	2.5101	0.023979	0.061212	0.985559	1291	2	2.5101
	ATP2B3	5	0.96016	0.96032	1	16789	0	0.70613	0.015037	0.057468	0.779207	1292	4	0.70613		RIBC1	3	0.25621	0.38315	0.993744	7586	2	-0.33655	0.024053	0.061375	0.985559	1292	1	-0.33655
	CILP2	5	0.83983	0.8442	1	14549	1	0.65938	0.01504	0.057479	0.779207	1293	4	0.65938		RCAN1	18	0.56431	0.8518	0.999665	11716	4	0.77376	0.024096	0.13665	0.990074	1293	12	0.77376
	PRKAG2	5	0.017429	0.056531	0.786094	1271	4	-0.72833	0.015061	0.057547	0.779552	1294	1	-0.72833		PARP15	6	0.16037	0.34462	0.991358	5319	3	0.64074	0.024098	0.093847	0.985559	1294	3	0.64074
	TNFAIP8L2	5	0.9694	0.96954	1	17008	0	0.55985	0.015096	0.057657	0.780301	1295	4	0.55985		FOXN3	6	0.09237	0.23321	0.988233	3582	4	-0.67922	0.024114	0.093897	0.985559	1295	2	-0.67922
	RFXANK	4	0.9849	0.98497	1	17400	0	0.88022	0.015097	0.049286	0.760862	1296	4	0.88022		ADAM18	3	0.97588	0.97606	0.999665	18491	0	1.2013	0.024119	0.061529	0.985559	1296	3	1.2013
	XDH	5	0.9156	0.91587	1	15911	0	0.60036	0.015107	0.057691	0.780301	1297	4	0.60036		PRR11	3	0.045627	0.11047	0.974719	2244	2	-1.7243	0.024137	0.061571	0.985559	1297	1	-1.7243
	TTC28	5	0.98488	0.98501	1	17399	0	0.5743	0.015116	0.057733	0.780301	1298	5	0.5743		ERG	11	0.0047915	0.027014	0.962523	276	3	0.83853	0.02415	0.11649	0.985559	1298	6	0.83853
	CCDC94	5	0.49947	0.64562	1	10937	1	0.46086	0.015153	0.057859	0.780565	1299	3	0.46086		SURF4	5	0.6396	0.75031	0.999665	12733	1	2.0172	0.02415	0.08807	0.985559	1299	4	2.0172
	TFCP2L1	5	0.45193	0.6035	1	10302	1	0.56077	0.015172	0.057931	0.780565	1300	4	0.56077		GNL2	3	0.65005	0.65987	0.999665	12891	1	0.89305	0.024179	0.061667	0.985559	1300	2	0.89305
	PRSS36	4	0.91253	0.91233	1	15849	0	1.0689	0.015179	0.049523	0.760862	1301	3	1.0689		OR13H1	3	0.22151	0.34032	0.991358	6749	2	-0.66918	0.024263	0.06186	0.985559	1301	1	-0.66918
	PHF20	4	0.4092	0.5546	1	9701	1	1.7693	0.015198	0.049571	0.760862	1302	3	1.7693		ARHGAP9	9	0.84868	0.92402	0.999665	16153	2	0.91037	0.024274	0.11148	0.985559	1302	6	0.91037
	TULP1	5	0.42875	0.5832	1	9979	1	0.90101	0.015204	0.058045	0.780565	1303	4	0.90101		GPR148	3	0.9757	0.97588	0.999665	18489	0	1.1211	0.024301	0.06195	0.985559	1303	3	1.1211
	PAPL	5	0.98477	0.9849	1	17397	0	0.57898	0.015226	0.058115	0.780565	1304	5	0.57898		KRTAP6-2	3	0.8911	0.89116	0.999665	16898	0	2.2796	0.024316	0.061989	0.985559	1304	3	2.2796
	EIF2B3	5	0.0086039	0.031357	0.696896	801	4	-2.7255	0.015227	0.058122	0.780565	1305	1	-2.7255		NSFL1C	3	0.97567	0.97586	0.999665	18488	0	1.5283	0.024327	0.062011	0.985559	1305	3	1.5283
	ZNF32	5	0.98477	0.98489	1	17396	0	0.70924	0.015232	0.058142	0.780565	1306	5	0.70924		WDR61	3	0.41575	0.5012	0.997083	9946	1	-0.5075	0.024347	0.062069	0.985559	1306	1	-0.5075
	FAM189B	5	0.98465	0.98477	1	17392	0	0.85024	0.015246	0.05819	0.780625	1307	5	0.85024		RPL36	4	0.95994	0.95988	0.999665	18178	0	1.4025	0.024363	0.076418	0.985559	1307	4	1.4025
	ARID3C	5	0.86868	0.86932	1	15025	1	0.90151	0.015274	0.058294	0.780754	1308	4	0.90151		KRT6A	3	0.1313	0.22611	0.988233	4624	2	-0.55313	0.02439	0.062164	0.985559	1308	1	-0.55313
	RRAGA	5	0.82643	0.83385	1	14350	1	0.22063	0.015283	0.05833	0.780754	1309	4	0.22063		PSTK	3	0.036403	0.089867	0.974719	1833	2	-0.60274	0.024432	0.062273	0.985559	1309	1	-0.60274
	KIF20B	4	0.96457	0.96446	1	16892	0	1.2235	0.015293	0.04987	0.760862	1310	4	1.2235		MECOM	12	0.7794	0.91836	0.999665	14986	3	0.55489	0.024438	0.1232	0.986979	1310	8	0.55489
	MFRP	5	0.89807	0.89844	1	15563	0	0.96052	0.015302	0.058405	0.781181	1311	4	0.96052		PDIA4	3	0.20711	0.32262	0.991358	6400	1	2.1611	0.024474	0.06239	0.985559	1311	2	2.1611
	MMP11	5	0.98468	0.9848	1	17393	0	0.62549	0.015322	0.058468	0.78144	1312	5	0.62549		MCOLN2	3	0.9755	0.97568	0.999665	18486	0	1.2267	0.024496	0.062433	0.985559	1312	3	1.2267
	C15orf52	5	0.85486	0.8567	1	14784	1	0.90508	0.015353	0.058575	0.78227	1313	4	0.90508		RNASEH2B	3	0.82546	0.82545	0.999665	15774	0	0.5868	0.024516	0.062482	0.985559	1313	2	0.5868
	SEC14L4	4	0.40772	0.55303	1	9677	1	1.14	0.015361	0.050081	0.761005	1314	3	1.14		CLPSL2	3	0.97545	0.97562	0.999665	18484	0	2.5089	0.02455	0.062561	0.985559	1314	3	2.5089
	RASA2	5	0.9674	0.9676	1	16963	0	0.91915	0.015366	0.058617	0.78227	1315	4	0.91915		CPNE7	3	0.97543	0.97559	0.999665	18483	0	1.3695	0.024575	0.062621	0.985559	1315	3	1.3695
	AGR2	4	0.19379	0.32841	1	6350	1	1.0435	0.015386	0.050151	0.761005	1316	3	1.0435		NCCRP1	3	0.90273	0.90279	0.999665	17119	0	2.5995	0.024605	0.062688	0.985559	1316	3	2.5995
	FAM73A	5	0.083488	0.19635	0.964438	3627	3	-0.56078	0.015394	0.058726	0.782695	1317	2	-0.56078		HAUS4	3	0.97537	0.97554	0.999665	18482	0	1.9994	0.024629	0.06275	0.985559	1317	3	1.9994
	SOX2	5	0.9846	0.98472	1	17391	0	0.30501	0.015401	0.058751	0.782695	1318	5	0.30501		WTIP	3	0.47246	0.53505	0.997083	10597	1	2.8521	0.024634	0.062767	0.985559	1318	2	2.8521
	EIF1AX	5	0.85294	0.85503	1	14763	1	1.0108	0.015412	0.058779	0.782695	1319	3	1.0108		NPAT	3	0.82484	0.82481	0.999665	15763	0	1.384	0.024642	0.062784	0.985559	1319	2	1.384
	LARGE	5	0.96295	0.96315	1	16864	0	0.89471	0.015431	0.058854	0.782928	1320	4	0.89471		SNRNP35	6	0.65165	0.78056	0.999665	12912	2	0.24166	0.024654	0.095485	0.985559	1320	3	0.24166
	FAM167A	5	0.58602	0.70941	1	11988	1	0.79145	0.015439	0.058884	0.782928	1321	4	0.79145		RNF115	3	0.83444	0.8344	0.999665	15914	0	0.54225	0.024684	0.06287	0.985559	1321	2	0.54225
	GPRASP1	5	0.57502	0.70535	1	11916	1	0.99407	0.015475	0.058999	0.783877	1322	4	0.99407		IL11RA	3	0.97531	0.97548	0.999665	18480	0	2.636	0.024691	0.062888	0.985559	1322	3	2.636
	PPP4R4	7	0.39209	0.60915	1	9446	2	0.79501	0.015514	0.066337	0.807486	1323	4	0.79501		PTPRU	3	0.79194	0.79202	0.999665	15208	0	2.9313	0.024736	0.063003	0.985559	1323	2	2.9313
	CCDC153	5	0.27029	0.44782	1	7693	2	0.70544	0.015562	0.0593	0.786761	1324	3	0.70544		KCNJ16	6	0.12049	0.28699	0.991358	4333	3	-0.26175	0.024738	0.095727	0.985559	1324	3	-0.26175
	GATAD1	5	0.79741	0.81327	1	13955	1	0.71172	0.01557	0.059331	0.786761	1325	4	0.71172		DUSP8	3	0.065829	0.14024	0.983159	2844	2	-2.8755	0.02481	0.063174	0.985559	1325	1	-2.8755
	DNAJA2	5	0.78075	0.80255	1	13757	1	1.1986	0.015574	0.059347	0.786761	1326	4	1.1986		CNFN	3	0.38027	0.48109	0.997083	9525	1	2.3577	0.024838	0.063246	0.985559	1326	2	2.3577
	RBMXL3	5	0.94737	0.94755	1	16527	0	1.0207	0.015589	0.059403	0.786925	1327	4	1.0207		HSFY2	3	0.97512	0.97527	0.999665	18475	0	0.89276	0.024883	0.063357	0.985559	1327	3	0.89276
	ACSBG1	5	0.17623	0.33979	1	5957	2	0.22566	0.015616	0.059496	0.787362	1328	3	0.22566		C11orf85	3	0.97511	0.97527	0.999665	18474	0	1.5299	0.02489	0.063376	0.985559	1328	3	1.5299
	RHBDD2	5	0.97842	0.97858	1	17223	0	0.68997	0.015623	0.059523	0.787362	1329	5	0.68997		HERC1	3	0.66819	0.67464	0.999665	13159	1	0.69693	0.024894	0.063386	0.985559	1329	2	0.69693
	IFI27L2	5	0.19282	0.36399	1	6325	1	0.76072	0.015675	0.059706	0.789197	1330	4	0.76072		HOXC8	3	0.97511	0.97527	0.999665	18473	0	2.2625	0.024894	0.063387	0.985559	1330	3	2.2625
	RRAGD	4	0.77431	0.77665	1	13691	1	0.92179	0.015682	0.051061	0.762135	1331	3	0.92179		HEMK1	3	0.97508	0.97524	0.999665	18472	0	1.6866	0.024916	0.063431	0.985559	1331	3	1.6866
	ZNF224	4	0.98427	0.98434	1	17387	0	1.1568	0.015729	0.051193	0.762135	1332	4	1.1568		OTUB2	3	0.40569	0.49534	0.997083	9828	1	2.3136	0.024925	0.063452	0.985559	1332	2	2.3136
	LAMTOR2	7	0.92383	0.92732	1	16070	1	0.82259	0.015762	0.067204	0.810902	1333	6	0.82259		SEPT4	12	0.38523	0.68031	0.999665	9586	3	1.0813	0.024928	0.12494	0.986979	1333	7	1.0813
	HTR3B	5	0.91223	0.91258	1	15843	0	0.65281	0.015762	0.060013	0.79151	1334	4	0.65281		SLC5A12	3	0.97506	0.97521	0.999665	18471	0	1.5817	0.024941	0.063498	0.985559	1334	3	1.5817
	SPAG6	5	0.98421	0.98431	1	17385	0	0.6789	0.01579	0.060112	0.792184	1335	5	0.6789		SNAI2	3	0.023507	0.060048	0.962523	1244	1	2.4183	0.024962	0.063553	0.985559	1335	2	2.4183
	DAXX	5	0.9842	0.9843	1	17384	0	0.62139	0.015804	0.060152	0.792184	1336	5	0.62139		FMO2	3	0.85723	0.85719	0.999665	16300	0	1.8932	0.024978	0.06358	0.985559	1336	2	1.8932
	ABCA7	5	0.9692	0.96935	1	17006	0	0.65618	0.015826	0.060228	0.792611	1337	4	0.65618		C16orf82	3	0.6435	0.6547	0.999665	12794	1	1.4904	0.02502	0.063693	0.985559	1337	2	1.4904
	GSTZ1	9	0.90946	0.94375	1	15780	1	0.48422	0.015827	0.077195	0.827159	1338	6	0.48422		CIDEC	9	0.055942	0.18655	0.983159	2576	3	0.031146	0.025081	0.1141	0.985559	1338	4	0.031146
	SLC38A4	4	0.98416	0.98422	1	17383	0	1.0738	0.015839	0.05152	0.762396	1339	4	1.0738		TCEAL6	3	0.9749	0.97506	0.999665	18470	0	1.9493	0.025095	0.063872	0.985559	1339	3	1.9493
	INPP5J	5	0.98416	0.98427	1	17382	0	1.011	0.015839	0.060277	0.792676	1340	5	1.011		ESRP2	3	0.59189	0.61519	0.999665	12051	1	1.2247	0.025104	0.063887	0.985559	1340	2	1.2247
	PTN	4	0.42426	0.57043	1	9924	2	0.66933	0.015842	0.051532	0.762396	1341	2	0.66933		TMEM52B	6	0.93416	0.93422	0.999665	17705	1	1.6102	0.025146	0.096893	0.985559	1341	5	1.6102
	FUBP1	5	0.98414	0.98424	1	17381	0	1.0403	0.015855	0.060336	0.792871	1342	5	1.0403		FAM180B	3	0.11637	0.2068	0.987152	4243	1	0.72419	0.025146	0.063984	0.985559	1342	2	0.72419
	CHRNA4	5	0.91987	0.9202	1	15991	0	0.42512	0.015894	0.060475	0.793192	1343	3	0.42512		ZNF227	3	0.50041	0.55263	0.997083	10926	1	2.8002	0.025174	0.064068	0.985559	1343	2	2.8002
	AMZ1	5	0.96612	0.96632	1	16937	0	0.56432	0.015895	0.060481	0.793192	1344	4	0.56432		RPS15	3	0.95952	0.95978	0.999665	18170	0	2.5706	0.025203	0.06414	0.985559	1344	3	2.5706
	FAM156B	3	0.9841	0.98424	1	17380	0	0.54376	0.015899	0.041526	0.723016	1345	3	0.54376		USP42	3	0.97099	0.97112	0.999665	18399	0	2.8804	0.02524	0.064224	0.985559	1345	3	2.8804
	ZDHHC9	5	0.95293	0.95311	1	16635	0	0.87774	0.0159	0.060501	0.793192	1346	4	0.87774		PSMB8	6	0.19246	0.3835	0.993744	6070	2	1.5272	0.025253	0.097186	0.985559	1346	4	1.5272
	GLTPD1	5	0.77359	0.79812	1	13685	1	0.91722	0.015916	0.060557	0.793192	1347	4	0.91722		USP43	3	0.91254	0.91262	0.999665	17299	0	2.3507	0.025269	0.06429	0.985559	1347	3	2.3507
	MYL12A	5	0.98408	0.98418	1	17379	0	1.0229	0.015923	0.060581	0.793192	1348	5	1.0229		TK2	9	0.33197	0.59366	0.999665	8944	4	0.18534	0.02529	0.11478	0.985559	1348	4	0.18534
	UTP11L	4	0.44619	0.58059	1	10222	1	1.25	0.015927	0.051796	0.762396	1349	3	1.25		UBE2Q2	6	0.83134	0.8676	0.999665	15868	1	1.3799	0.025308	0.097341	0.985559	1349	5	1.3799
	HYLS1	5	0.88077	0.88123	1	15252	0	0.61692	0.015949	0.060676	0.79386	1350	4	0.61692		PUF60	6	0.85716	0.88003	0.999665	16298	1	1.0267	0.025317	0.097368	0.985559	1350	5	1.0267
	SPIB	9	0.058581	0.18861	0.957897	2935	2	0.79033	0.015993	0.077806	0.827762	1351	6	0.79033		CFP	6	0.88852	0.89808	0.999665	16841	1	1.1949	0.025332	0.097413	0.985559	1351	4	1.1949
	CABYR	7	0.59684	0.75133	1	12064	1	0.8449	0.015995	0.068064	0.812543	1352	6	0.8449		MRPL3	3	0.78809	0.7882	0.999665	15144	0	0.82933	0.025356	0.064491	0.985559	1352	2	0.82933
	MSLN	5	0.984	0.98411	1	17377	0	0.34382	0.016003	0.060853	0.795592	1353	5	0.34382		SDCBP	3	0.90249	0.90255	0.999665	17117	0	1.0515	0.025398	0.064592	0.985559	1353	3	1.0515
	C2orf49	5	0.98398	0.98409	1	17376	0	0.6673	0.016021	0.060925	0.795817	1354	5	0.6673		CYTH4	3	0.028	0.07067	0.962523	1460	1	2.585	0.025408	0.064613	0.985559	1354	2	2.585
	PIGN	5	0.98396	0.98407	1	17375	0	0.43072	0.01604	0.060997	0.795817	1355	5	0.43072		RPS4Y1	3	0.55868	0.59148	0.999665	11643	1	1.8314	0.02544	0.064693	0.985559	1355	2	1.8314
	KDM5A	5	0.9535	0.95369	1	16643	0	0.62241	0.016042	0.061003	0.795817	1356	3	0.62241		EEF1A1	3	0.97452	0.97468	0.999665	18467	0	2.5836	0.025478	0.064781	0.985559	1356	3	2.5836
	DOHH	5	0.98392	0.98403	1	17374	0	1.2432	0.016079	0.061124	0.795817	1357	5	1.2432		SLC39A1	15	0.48075	0.78636	0.999665	10692	4	0.61589	0.0255	0.13567	0.989756	1357	8	0.61589
	ACTRT2	5	0.97695	0.97712	1	17177	0	0.52421	0.01608	0.061128	0.795817	1358	5	0.52421		STEAP4	3	0.59295	0.616	0.999665	12067	1	0.5162	0.025524	0.064886	0.985559	1358	2	0.5162
	BAK1	5	0.44276	0.59539	1	10173	2	0.11904	0.016092	0.061172	0.795817	1359	2	0.11904		ABCA10	3	0.4376	0.51394	0.997083	10182	1	2.1927	0.025541	0.064927	0.985559	1359	2	2.1927
	PNMA5	5	0.2649	0.44331	1	7609	1	0.95927	0.016094	0.061179	0.795817	1360	4	0.95927		SLC7A8	9	0.81818	0.90973	0.999665	15650	2	1.2469	0.025545	0.11556	0.985559	1360	6	1.2469
	ELK1	7	0.29604	0.51213	1	8044	2	0.82387	0.016122	0.068513	0.812543	1361	5	0.82387		HS3ST5	3	0.97445	0.97462	0.999665	18466	0	1.6398	0.025548	0.064942	0.985559	1361	3	1.6398
	GATA4	5	0.98386	0.98397	1	17370	0	0.86903	0.016143	0.061353	0.795933	1362	5	0.86903		OXCT1	3	0.96764	0.96781	0.999665	18341	0	2.2041	0.025548	0.064942	0.985559	1362	3	2.2041
	NOA1	5	0.98385	0.98397	1	17368	0	0.44081	0.016147	0.061367	0.795933	1363	5	0.44081		NUDT6	6	0.89024	0.89922	0.999665	16881	1	1.5017	0.025553	0.09805	0.985559	1363	5	1.5017
	C3orf84	5	0.89771	0.89811	1	15557	0	1.1801	0.016153	0.061389	0.795933	1364	4	1.1801		NM_001029887	3	0.81112	0.81102	0.999665	15540	0	1.0499	0.025566	0.064991	0.985559	1364	2	1.0499
	RTL1	5	0.98382	0.98393	1	17367	0	0.55274	0.016181	0.061484	0.795933	1365	5	0.55274		H2AFB3	3	0.97443	0.9746	0.999665	18465	0	1.2764	0.025567	0.064994	0.985559	1365	3	1.2764
	ZNF428	5	0.22873	0.41312	1	7139	1	1.3295	0.01621	0.061592	0.795933	1366	4	1.3295		SURF1	3	0.20554	0.32066	0.991358	6366	1	2.7667	0.025593	0.06505	0.985559	1366	2	2.7667
	HELQ	5	0.98378	0.98388	1	17366	0	0.3899	0.016222	0.061641	0.795933	1367	5	0.3899		BEND7	3	0.9744	0.97455	0.999665	18464	0	1.6832	0.025604	0.065075	0.985559	1367	3	1.6832
	VPS33B	5	0.51406	0.65872	1	11146	2	-0.057575	0.016225	0.061647	0.795933	1368	2	-0.057575		TNXB	9	0.49101	0.72971	0.999665	10809	2	0.87222	0.025604	0.11577	0.985559	1368	6	0.87222
	EFS	5	0.75854	0.7891	1	13490	1	0.66358	0.016226	0.061653	0.795933	1369	4	0.66358		KIF17	3	0.74596	0.74615	0.999665	14432	0	2.4686	0.025615	0.065101	0.985559	1369	2	2.4686
	GPR6	5	0.5948	0.71278	1	12054	1	0.43047	0.016233	0.061678	0.795933	1370	3	0.43047		TAP2	5	0.89235	0.89277	0.999665	16923	1	1.179	0.025616	0.092756	0.985559	1370	4	1.179
	ARHGEF38	5	0.98377	0.98387	1	17365	0	0.71377	0.016235	0.061683	0.795933	1371	5	0.71377		ATP13A4	3	0.49552	0.54952	0.997083	10858	1	2.3171	0.025644	0.065158	0.985559	1371	2	2.3171
	KIAA1549	4	0.98376	0.9838	1	17364	0	0.4767	0.016242	0.052786	0.765138	1372	4	0.4767		RNF175	3	0.61682	0.63382	0.999665	12394	1	0.29986	0.02565	0.065167	0.985559	1372	2	0.29986
	CD14	5	0.95744	0.95763	1	16727	0	0.67097	0.016267	0.061791	0.795933	1373	4	0.67097		TAF4B	3	0.28614	0.41954	0.994188	8254	1	2.4427	0.025659	0.065194	0.985559	1373	2	2.4427
	PRRC2B	5	0.36043	0.52395	1	9004	2	-0.17548	0.016275	0.061819	0.795933	1374	2	-0.17548		DCPS	3	0.87103	0.87112	0.999665	16545	0	2.3768	0.025689	0.065266	0.985559	1374	3	2.3768
	GPR84	5	0.14854	0.29836	1	5298	1	0.41648	0.016282	0.061851	0.795933	1375	3	0.41648		ARCN1	3	0.74153	0.74167	0.999665	14356	1	0.40011	0.025692	0.065275	0.985559	1375	2	0.40011
	MB	5	0.95914	0.95931	1	16764	0	0.73059	0.016329	0.062005	0.797337	1376	4	0.73059		RBM17	6	0.43296	0.63238	0.999665	10124	1	2.1197	0.025713	0.098503	0.985559	1376	5	2.1197
	DUSP5	5	0.90775	0.90811	1	15747	0	0.74676	0.016416	0.062316	0.799013	1377	3	0.74676		C6orf52	3	0.97428	0.97444	0.999665	18463	0	1.8221	0.025719	0.065327	0.985559	1377	3	1.8221
	LARP4	4	0.98356	0.98362	1	17362	0	0.89626	0.016435	0.05334	0.767101	1378	4	0.89626		RECK	3	0.26779	0.3972	0.994188	7846	1	2.2274	0.02574	0.065384	0.985559	1378	2	2.2274
	ODF2L	5	0.027317	0.083233	0.843543	1750	3	-1.2749	0.016449	0.062435	0.799013	1379	1	-1.2749		CPA1	3	0.97426	0.97442	0.999665	18462	0	1.3327	0.025741	0.065384	0.985559	1379	3	1.3327
	PODXL	5	0.98353	0.98364	1	17361	0	0.27856	0.016469	0.062497	0.799013	1380	5	0.27856		CPNE9	3	0.49126	0.54679	0.997083	10815	1	2.5766	0.025763	0.06543	0.985559	1380	2	2.5766
	EFTUD1	5	0.2225	0.40641	1	7023	2	1.2127	0.016505	0.062618	0.799013	1381	3	1.2127		A1CF	3	0.97423	0.97438	0.999665	18461	0	1.9693	0.025771	0.065445	0.985559	1381	3	1.9693
	CLEC2D	11	0.81544	0.92281	1	14189	2	0.50207	0.016511	0.084503	0.832542	1382	7	0.50207		PARVG	6	0.47745	0.6607	0.999665	10646	1	1.38	0.025779	0.0987	0.985559	1382	5	1.38
	TRMT61B	5	0.98348	0.98358	1	17360	0	0.35216	0.016522	0.062677	0.799013	1383	5	0.35216		GRIA2	6	0.91167	0.91438	0.999665	17280	1	1.5418	0.025786	0.098718	0.985559	1383	5	1.5418
	KHK	5	0.98347	0.98357	1	17359	0	0.71958	0.01653	0.062705	0.799013	1384	5	0.71958		DUS1L	3	0.7156	0.71665	0.999665	13905	1	2.2685	0.025807	0.065536	0.985559	1384	2	2.2685
	EPHA4	5	0.139	0.28382	0.997231	5076	1	0.82755	0.016533	0.062719	0.799013	1385	4	0.82755		ZNRD1	3	0.97417	0.97432	0.999665	18460	0	1.1358	0.025827	0.065581	0.985559	1385	3	1.1358
	ZNF793	5	0.76073	0.79039	1	13516	1	-0.074802	0.01656	0.062818	0.799013	1386	2	-0.074802		C10orf32	3	0.86036	0.86037	0.999665	16354	0	2.5843	0.025866	0.06567	0.985559	1386	2	2.5843
	MED1	5	0.073325	0.17981	0.952873	3369	3	-0.47797	0.016567	0.062843	0.799013	1387	2	-0.47797		UBE3C	3	0.97409	0.97423	0.999665	18459	0	2.1092	0.025913	0.065773	0.985559	1387	3	2.1092
	KCTD6	4	0.016159	0.050604	0.766694	1212	3	-0.76311	0.016605	0.053843	0.771158	1388	1	-0.76311		FAR1	3	0.97406	0.9742	0.999665	18458	0	1.6691	0.025943	0.065842	0.985559	1388	3	1.6691
	ADO	5	0.98339	0.9835	1	17358	0	0.83356	0.016606	0.062972	0.799013	1389	5	0.83356		ESRRB	3	0.33878	0.45838	0.996866	9025	1	1.558	0.025944	0.065844	0.985559	1389	2	1.558
	SCNM1	5	0.98339	0.98349	1	17357	0	0.92085	0.016615	0.062999	0.799013	1390	5	0.92085		GON4L	5	0.37639	0.54923	0.997083	9468	1	0.81883	0.025956	0.09381	0.985559	1390	3	0.81883
	IL31RA	5	0.30987	0.48099	1	8267	2	0.36167	0.016615	0.063	0.799013	1391	3	0.36167		CCDC124	6	0.38029	0.59825	0.999665	9526	3	0.061741	0.026006	0.099318	0.985559	1391	3	0.061741
	PDZK1IP1	5	0.70034	0.75827	1	12893	1	0.85885	0.016619	0.063016	0.799013	1392	4	0.85885		PPP6R3	3	0.97399	0.97412	0.999665	18456	0	1.3858	0.026011	0.066006	0.985559	1392	3	1.3858
	GALM	5	0.98338	0.98348	1	17356	0	0.46943	0.016621	0.063022	0.799013	1393	5	0.46943		TSC2	3	0.66589	0.67277	0.999665	13131	1	0.89947	0.026028	0.066043	0.985559	1393	2	0.89947
	TMEM179B	4	0.73688	0.74614	1	13257	1	0.40438	0.01665	0.05396	0.771158	1394	2	0.40438		SCN11A	6	0.029832	0.10093	0.974719	1556	1	1.1254	0.026055	0.099471	0.985559	1394	3	1.1254
	VRK1	5	0.84551	0.84882	1	14629	1	1.1143	0.01667	0.063182	0.799013	1395	3	1.1143		IRGQ	3	0.53128	0.57286	0.999126	11303	1	0.60241	0.02607	0.066145	0.985559	1395	2	0.60241
	FN3K	5	0.91361	0.91394	1	15872	0	0.17098	0.016671	0.063186	0.799013	1396	2	0.17098		KCTD19	3	0.7434	0.74357	0.999665	14387	1	2.8029	0.026089	0.066192	0.985559	1396	2	2.8029
	ADH6	5	0.98331	0.98341	1	17355	0	0.54165	0.016689	0.063248	0.799013	1397	5	0.54165		EYA3	3	0.94112	0.94124	0.999665	17837	0	2.1752	0.026097	0.066221	0.985559	1397	3	2.1752
	UBE2Q1	5	0.71771	0.76694	1	13059	1	0.67764	0.016696	0.063269	0.799013	1398	4	0.67764		TAF15	3	0.36078	0.47033	0.997083	9276	1	1.6785	0.026112	0.066262	0.985559	1398	2	1.6785
	ZNF276	5	0.92843	0.92871	1	16157	0	0.32432	0.016718	0.063345	0.799013	1399	4	0.32432		AMH	3	0.29765	0.43354	0.995281	8521	1	0.78966	0.026154	0.066345	0.985559	1399	2	0.78966
	CNEP1R1	5	0.77392	0.79833	1	13686	1	1.0818	0.016719	0.063347	0.799013	1400	4	1.0818		THSD4	6	0.19746	0.38955	0.994188	6197	2	0.48469	0.02618	0.099818	0.985559	1400	3	0.48469
	PARP15	5	0.099197	0.22174	0.975065	4062	2	0.079021	0.016726	0.063366	0.799013	1401	2	0.079021		PDE6D	3	0.97376	0.97388	0.999665	18453	0	1.851	0.026244	0.066552	0.985559	1401	3	1.851
	SVOPL	5	0.98327	0.98337	1	17353	0	0.54535	0.01673	0.063376	0.799013	1402	5	0.54535		TPSD1	3	0.88453	0.8846	0.999665	16782	0	2.1576	0.026276	0.066633	0.985559	1402	3	2.1576
	TBL2	5	0.53913	0.68145	1	11485	1	0.93114	0.016736	0.063393	0.799013	1403	3	0.93114		GADD45B	3	0.45103	0.52191	0.997083	10347	1	0.6694	0.02628	0.06664	0.985559	1403	1	0.6694
	RASA3	5	0.85988	0.8611	1	14873	1	0.85178	0.016743	0.063418	0.799013	1404	4	0.85178		UMODL1	6	0.42526	0.62756	0.999665	10048	2	1.302	0.026291	0.10014	0.985559	1404	4	1.302
	GCSAM	4	0.15788	0.29044	1	5521	1	0.99454	0.016768	0.054329	0.77118	1405	3	0.99454		RSPH10B	3	0.5099	0.55872	0.997083	11039	1	0.45168	0.026322	0.06674	0.985559	1405	2	0.45168
	HAO1	5	0.94453	0.94472	1	16475	0	1.076	0.016777	0.06354	0.799013	1406	4	1.076		POC1B	6	0.11496	0.2767	0.991165	4209	4	-0.5928	0.026327	0.10022	0.985559	1406	2	-0.5928
	POLR2M	5	0.98322	0.98332	1	17351	0	0.44778	0.016779	0.063545	0.799013	1407	5	0.44778		IER5L	3	0.89678	0.89687	0.999665	17012	0	2.2437	0.026328	0.066752	0.985559	1407	3	2.2437
	CXADR	5	0.34221	0.50846	1	8745	2	0.6445	0.016786	0.063567	0.799013	1408	3	0.6445		ZFHX4	3	0.85957	0.85959	0.999665	16332	0	1.4997	0.026364	0.066846	0.985559	1408	2	1.4997
	KLHL34	5	0.98321	0.98331	1	17350	0	0.41001	0.016792	0.063582	0.799013	1409	5	0.41001		SAMD12	3	0.97364	0.97377	0.999665	18450	0	1.5541	0.026365	0.066847	0.985559	1409	3	1.5541
	IFI27L1	5	0.76863	0.79508	1	13617	1	0.57183	0.016794	0.0636	0.799013	1410	4	0.57183		LAS1L	3	0.97363	0.97376	0.999665	18449	0	1.2098	0.026372	0.066863	0.985559	1410	3	1.2098
	ZC3H15	4	0.98085	0.9809	1	17286	0	1.1667	0.016802	0.054418	0.77118	1411	4	1.1667		SFXN5	3	0.14147	0.23925	0.988921	4868	1	1.1177	0.026406	0.066943	0.985559	1411	2	1.1177
	MYO19	5	0.98317	0.98328	1	17348	0	0.37543	0.016826	0.063709	0.799334	1412	5	0.37543		PDE1A	12	0.52442	0.78724	0.999665	11239	4	1.1572	0.026407	0.13021	0.989736	1412	7	1.1572
	PATZ1	5	0.90892	0.9093	1	15765	0	0.50451	0.016828	0.063714	0.799334	1413	3	0.50451		BVES	9	0.49904	0.73477	0.999665	10907	1	0.98385	0.026422	0.11843	0.985559	1413	7	0.98385
	RBM3	5	0.98315	0.98325	1	17347	0	0.45615	0.016854	0.063814	0.800032	1414	5	0.45615		SUMF2	3	0.94006	0.94021	0.999665	17822	0	2.2185	0.026433	0.067014	0.985559	1414	3	2.2185
	HIST2H2AC	4	0.98313	0.98321	1	17345	0	0.61264	0.016871	0.054635	0.77118	1415	4	0.61264		HIST1H3F	3	0.97353	0.97366	0.999665	18447	0	1.192	0.026475	0.067112	0.985559	1415	3	1.192
	SPCS1	5	0.45001	0.60179	1	10276	2	0.93268	0.016892	0.06393	0.800923	1416	3	0.93268		EFNA1	3	0.87776	0.87783	0.999665	16650	0	1.2066	0.02649	0.067151	0.985559	1416	3	1.2066
	ANO7	5	0.61945	0.72249	1	12233	1	0.75964	0.016906	0.063978	0.800965	1417	3	0.75964		ZNF519	3	0.97351	0.97364	0.999665	18445	0	1.897	0.02649	0.067151	0.985559	1417	3	1.897
	CHN2	5	0.98306	0.98316	1	17344	0	0.51762	0.016944	0.064111	0.801667	1418	5	0.51762		FAM84B	3	0.97349	0.97362	0.999665	18444	0	1.7451	0.026509	0.067193	0.985559	1418	3	1.7451
	U2SURP	5	0.56853	0.70303	1	11873	1	0.37251	0.016948	0.064123	0.801667	1419	3	0.37251		PCMT1	3	0.018168	0.047106	0.962523	990	2	-2.3655	0.026532	0.067242	0.985559	1419	1	-2.3655
	SERPINB8	13	0.51541	0.78359	1	11158	3	0.68547	0.016953	0.090733	0.84609	1420	10	0.68547		ADAM8	3	0.63858	0.6508	0.999665	12719	1	2.2352	0.026545	0.067271	0.985559	1420	2	2.2352
	IRF8	5	0.82029	0.82934	1	14261	1	0.95866	0.016977	0.064217	0.802059	1421	4	0.95866		CAB39L	9	0.15487	0.37656	0.993744	5180	3	0.55235	0.026559	0.11891	0.985559	1421	5	0.55235
	NAF1	5	0.97758	0.97775	1	17198	0	0.7447	0.016986	0.064243	0.802059	1422	5	0.7447		ARHGEF33	3	0.97343	0.97356	0.999665	18443	0	1.341	0.02657	0.067338	0.985559	1422	3	1.341
	FAM160B1	5	0.98297	0.98307	1	17342	0	0.76438	0.017032	0.064411	0.803011	1423	5	0.76438		SLC27A5	3	0.13137	0.22621	0.988233	4626	2	-1.3381	0.026573	0.067351	0.985559	1423	1	-1.3381
	UBE3D	5	0.76413	0.79241	1	13569	1	0.65764	0.017048	0.06447	0.803011	1424	3	0.65764		C10orf91	3	0.3134	0.44501	0.995666	8760	1	2.5473	0.026605	0.067432	0.985559	1424	2	2.5473
	TMSB15A	2	0.33435	0.35959	1	8637	1	0.42575	0.017097	0.031894	0.678704	1425	1	0.42575		MYOM2	3	0.96539	0.96556	0.999665	18293	0	1.0787	0.026615	0.06745	0.985559	1425	3	1.0787
	MAP3K6	5	0.94111	0.9413	1	16407	0	0.80972	0.017098	0.064641	0.803038	1426	4	0.80972		DCTN1	9	0.20776	0.45866	0.996866	6418	4	-0.022771	0.026662	0.11923	0.985559	1426	3	-0.022771
	HELB	5	0.94694	0.94711	1	16519	0	0.67132	0.017125	0.064732	0.803038	1427	4	0.67132		PIP4K2B	3	0.84324	0.84327	0.999665	16069	0	0.29497	0.026699	0.067653	0.985559	1427	2	0.29497
	ASB7	5	0.98287	0.98297	1	17341	0	0.32002	0.017132	0.064757	0.803038	1428	5	0.32002		GM2A	3	0.96422	0.96443	0.999665	18260	0	2.5055	0.02671	0.06768	0.985559	1428	3	2.5055
	BMI1	5	0.45581	0.60695	1	10351	1	1.4846	0.017145	0.064804	0.803038	1429	4	1.4846		METRNL	3	0.97326	0.97339	0.999665	18440	0	1.5926	0.026741	0.06775	0.985559	1429	3	1.5926
	BHLHE40	5	0.98285	0.98296	1	17340	0	0.5885	0.017149	0.064818	0.803038	1430	5	0.5885		CRX	3	0.47302	0.5354	0.997083	10604	1	2.2181	0.026741	0.06775	0.985559	1430	2	2.2181
	PHLDB1	5	0.90343	0.90379	1	15671	0	0.717	0.01716	0.064857	0.803038	1431	4	0.717		MAP3K6	3	0.97325	0.97338	0.999665	18439	0	1.2697	0.026749	0.067762	0.985559	1431	3	1.2697
	ENPP4	5	0.34074	0.50723	1	8724	1	1.5643	0.017166	0.064886	0.803038	1432	3	1.5643		RAB6B	3	0.97031	0.97046	0.999665	18387	0	2.676	0.026778	0.067828	0.985559	1432	3	2.676
	HEPACAM	5	0.98283	0.98294	1	17339	0	0.37787	0.017171	0.064901	0.803038	1433	5	0.37787		SCYL3	3	0.58982	0.61366	0.999665	12025	1	1.8883	0.026783	0.067841	0.985559	1433	2	1.8883
	XKR9	4	0.85404	0.85347	1	14774	0	0.28584	0.017227	0.055707	0.775773	1434	3	0.28584		CFAP53	3	0.40439	0.49459	0.997083	9810	1	0.0029704	0.026825	0.067931	0.985559	1434	1	0.0029704
	TIMP4	5	0.20455	0.38096	1	6607	1	0.45161	0.017227	0.065094	0.803724	1435	3	0.45161		OR9A2	3	0.96301	0.96324	0.999665	18233	0	1.0896	0.026867	0.06802	0.985559	1435	3	1.0896
	THADA	5	0.48802	0.63537	1	10797	1	1.0729	0.017233	0.065114	0.803724	1436	4	1.0729		UFC1	3	0.83568	0.83563	0.999665	15936	0	1.2131	0.026951	0.06823	0.985559	1436	2	1.2131
	TNFRSF1B	5	0.05472	0.14893	0.932656	2818	3	-0.31378	0.017261	0.065204	0.803724	1437	2	-0.31378		PTRH1	3	0.97303	0.97317	0.999665	18435	0	1.3188	0.026971	0.068277	0.985559	1437	3	1.3188
	IFITM5	5	0.91555	0.91581	1	15910	0	0.76794	0.01727	0.065235	0.803724	1438	4	0.76794		RUNX1T1	18	0.36356	0.70859	0.999665	9307	5	0.423	0.026993	0.14866	0.997831	1438	11	0.423
	CORIN	5	0.88066	0.88111	1	15251	0	0.24196	0.017281	0.065269	0.803724	1439	3	0.24196		UQCR11	3	0.71375	0.71496	0.999665	13870	1	2.876	0.027005	0.068357	0.985559	1439	2	2.876
	TRAPPC2	4	0.77973	0.78139	1	13746	1	1.6353	0.017309	0.055955	0.777235	1440	3	1.6353		TSC22D2	3	0.97298	0.97312	0.999665	18434	0	1.5477	0.027017	0.068391	0.985559	1440	3	1.5477
	TOP3B	5	0.25291	0.4333	1	7469	1	0.86811	0.017318	0.065405	0.803741	1441	4	0.86811		SNTG1	6	0.86319	0.88319	0.999665	16404	1	1.4355	0.027027	0.10228	0.985559	1441	5	1.4355
	DNASE1	5	0.68561	0.75125	1	12757	1	0.93741	0.017377	0.065615	0.805779	1442	4	0.93741		GGT5	3	0.88747	0.88755	0.999665	16827	0	3.2762	0.02705	0.068469	0.985559	1442	3	3.2762
	ZC3H8	5	0.40625	0.56373	1	9652	2	1.5595	0.017392	0.06566	0.805783	1443	3	1.5595		POLDIP2	3	0.97294	0.97306	0.999665	18433	0	2.1826	0.027064	0.068494	0.985559	1443	3	2.1826
	GFRA2	5	0.98259	0.98269	1	17336	0	0.60451	0.017414	0.065723	0.805997	1444	5	0.60451		GPRC5A	3	0.97293	0.97306	0.999665	18432	0	1.4044	0.027071	0.068508	0.985559	1444	3	1.4044
	PDE7B	5	0.87887	0.87933	1	15212	0	0.8117	0.017486	0.065982	0.807148	1445	4	0.8117		RHAG	3	0.97292	0.97304	0.999665	18431	0	1.8186	0.027083	0.068533	0.985559	1445	3	1.8186
	PPIA	1	0.98246	0.98257	1	17335	0	4.0612	0.017536	0.017456	0.582411	1446	1	4.0612		ZNF805	3	0.97285	0.97298	0.999665	18429	0	1.9849	0.027148	0.068684	0.985559	1446	3	1.9849
	TGFB1I1	5	0.96551	0.96571	1	16918	0	0.71518	0.01754	0.066167	0.807148	1447	4	0.71518		FCER2	6	0.56348	0.71782	0.999665	11706	1	0.87946	0.027151	0.10264	0.985559	1447	3	0.87946
	SLC10A1	5	0.98245	0.98256	1	17334	0	0.59835	0.017549	0.066203	0.807148	1448	5	0.59835		RPP25L	3	0.97284	0.97298	0.999665	18428	0	1.4146	0.02716	0.06872	0.985559	1448	3	1.4146
	CCDC159	5	0.98245	0.98256	1	17333	0	0.71223	0.017551	0.066215	0.807148	1449	5	0.71223		CNOT8	3	0.97189	0.97207	0.999665	18413	0	2.4312	0.027217	0.068848	0.985559	1449	3	2.4312
	FKBP1A	5	0.23865	0.42148	1	7284	2	0.87763	0.017558	0.066236	0.807148	1450	3	0.87763		PSMD1	3	0.79781	0.79779	0.999665	15303	0	2.2374	0.02724	0.068901	0.985559	1450	2	2.2374
	SYN3	5	0.98244	0.98254	1	17332	0	0.44713	0.017562	0.066254	0.807148	1451	5	0.44713		TFE3	3	0.97276	0.9729	0.999665	18427	0	0.97216	0.027241	0.068905	0.985559	1451	3	0.97216
	MAGEE1	5	0.31078	0.48175	1	8281	1	0.61854	0.017563	0.066256	0.807148	1452	4	0.61854		MGC57346-CRHR1	2	0.88831	0.88791	0.999665	16838	0	2.7941	0.027286	0.050169	0.985559	1452	2	2.7941
	ASB16	5	0.25781	0.43735	1	7525	2	0.78762	0.017564	0.06626	0.807148	1453	3	0.78762		ME1	3	0.27994	0.41208	0.994188	8115	1	1.5534	0.027287	0.06901	0.985559	1453	2	1.5534
	C6	4	0.98244	0.9825	1	17331	0	0.66497	0.017564	0.056697	0.777235	1454	4	0.66497		PPP2R1A	3	0.81064	0.81055	0.999665	15529	0	0.49259	0.027329	0.069106	0.985559	1454	2	0.49259
	ANO9	5	0.98243	0.98254	1	17330	0	0.79378	0.017567	0.066265	0.807148	1455	5	0.79378		SWAP70	3	0.92738	0.92748	0.999665	17561	0	2.5145	0.027331	0.069112	0.985559	1455	3	2.5145
	OAS1	5	0.98232	0.98244	1	17328	0	0.77713	0.017678	0.066632	0.808642	1456	5	0.77713		CLNK	3	0.95589	0.95619	0.999665	18113	0	2.5973	0.027371	0.06921	0.985559	1456	3	2.5973
	CNRIP1	5	0.69888	0.75756	1	12878	1	0.79383	0.017715	0.066748	0.808733	1457	4	0.79383		BUB1B	3	0.97262	0.97276	0.999665	18425	0	1.3663	0.027384	0.069236	0.985559	1457	3	1.3663
	ACTG2	6	0.98073	0.98067	1	17281	0	0.75746	0.017739	0.070949	0.814853	1458	5	0.75746		ODF2	12	0.38592	0.68095	0.999665	9598	4	0.38342	0.027423	0.13382	0.989756	1458	6	0.38342
	SMCO2	5	0.88056	0.881	1	15249	0	0.87083	0.01777	0.066941	0.809916	1459	4	0.87083		TMEM42	3	0.37366	0.47741	0.997083	9433	1	2.7498	0.027455	0.069392	0.985559	1459	2	2.7498
	GAS8	5	0.55173	0.69299	1	11665	1	0.49078	0.01778	0.066983	0.809916	1460	3	0.49078		CERS6	3	0.97253	0.97267	0.999665	18424	0	1.9084	0.027474	0.069438	0.985559	1460	3	1.9084
	COPS4	5	0.98222	0.98235	1	17327	0	1.044	0.01778	0.066987	0.809916	1461	5	1.044		RLTPR	3	0.97251	0.97266	0.999665	18423	0	2.2574	0.027486	0.069464	0.985559	1461	3	2.2574
	PLD6	5	0.49068	0.63771	1	10826	1	0.15023	0.017835	0.06716	0.810902	1462	3	0.15023		PURG	6	0.21114	0.40582	0.994188	6495	3	-0.3302	0.027506	0.10368	0.985559	1462	2	-0.3302
	ZBED2	5	0.98215	0.98228	1	17325	0	0.48822	0.017848	0.067203	0.810902	1463	5	0.48822		ESRRG	21	0.87423	0.97739	0.999665	16580	3	0.71838	0.027508	0.15772	0.999535	1463	13	0.71838
	SRP19	6	0.60706	0.74266	1	12132	1	0.89604	0.017858	0.071319	0.814865	1464	5	0.89604		SLC4A4	5	0.73486	0.78975	0.999665	14232	1	1.5025	0.027535	0.098872	0.985559	1464	3	1.5025
	AQP10	5	0.98214	0.98227	1	17323	0	0.58478	0.017861	0.067253	0.810956	1465	5	0.58478		CD79A	3	0.19733	0.31036	0.991358	6193	1	2.2962	0.027552	0.069614	0.985559	1465	2	2.2962
	TMEM214	5	0.97755	0.97772	1	17196	0	0.90071	0.01789	0.06736	0.811489	1466	5	0.90071		DTX2	6	0.79863	0.85377	0.999665	15319	1	1.5259	0.027569	0.10386	0.985559	1466	4	1.5259
	SLC44A4	5	0.98206	0.9822	1	17321	0	0.85278	0.017942	0.067545	0.811489	1467	5	0.85278		ANAPC11	8	0.96679	0.96757	0.999665	18321	1	1.7405	0.027595	0.11717	0.985559	1467	6	1.7405
	C16orf91	5	0.98206	0.9822	1	17320	0	0.43945	0.017944	0.06755	0.811489	1468	5	0.43945		DDX20	3	0.57269	0.60128	0.999665	11828	1	2.5789	0.027613	0.069757	0.985559	1468	2	2.5789
	ESCO1	4	0.98204	0.98211	1	17319	0	0.89462	0.01796	0.057837	0.780565	1469	4	0.89462		C1orf195	3	0.29014	0.42438	0.994188	8351	2	-0.30989	0.027622	0.069779	0.985559	1469	1	-0.30989
	DLGAP3	5	0.98203	0.98217	1	17318	0	0.37748	0.017974	0.067658	0.811489	1470	5	0.37748		PFKM	9	0.096361	0.27159	0.991165	3695	2	1.1876	0.02767	0.12246	0.986979	1470	7	1.1876
	CAP2	5	0.84972	0.85232	1	14705	1	1.2028	0.017976	0.067664	0.811489	1471	4	1.2028		KRTAP12-3	3	0.17028	0.27604	0.991165	5554	1	1.9677	0.027706	0.069982	0.985559	1471	2	1.9677
	TK2	5	0.76456	0.79266	1	13575	1	0.94804	0.017982	0.067684	0.811489	1472	4	0.94804		CACNA2D4	3	0.97225	0.97242	0.999665	18420	0	0.96761	0.027747	0.070073	0.985559	1472	3	0.96761
	NUAK2	5	0.867	0.86773	1	14991	1	0.46301	0.017995	0.067724	0.811489	1473	3	0.46301		DCTN5	3	0.01469	0.038553	0.962523	813	1	0.30935	0.027748	0.070076	0.985559	1473	2	0.30935
	SRA1	5	0.12358	0.25987	0.990693	4690	1	0.46668	0.018001	0.067748	0.811489	1474	4	0.46668		SEMA6D	6	0.63615	0.76927	0.999665	12682	1	1.4862	0.027751	0.10437	0.985559	1474	5	1.4862
	SDF4	4	0.73773	0.74683	1	13273	1	0.82332	0.018002	0.057966	0.780565	1475	3	0.82332		NKD1	3	0.62564	0.64058	0.999665	12523	1	2.0464	0.027774	0.070135	0.985559	1475	2	2.0464
	HES3	5	0.77246	0.79743	1	13664	1	0.53759	0.018025	0.067835	0.81199	1476	4	0.53759		SRCAP	3	0.85131	0.8513	0.999665	16200	0	0.44643	0.02779	0.070173	0.985559	1476	2	0.44643
	FAM47A	4	0.98195	0.98202	1	17315	0	0.53337	0.018048	0.058087	0.780565	1477	4	0.53337		CABP1	6	0.36537	0.58185	0.999665	9338	3	0.011361	0.02783	0.10458	0.985559	1477	3	0.011361
	RMDN3	5	0.45946	0.61011	1	10394	1	0.032542	0.018056	0.067934	0.812543	1478	2	0.032542		MBD1	6	0.6778	0.80014	0.999665	13294	1	1.3177	0.027875	0.1047	0.985559	1478	4	1.3177
	KLHL26	5	0.39097	0.55033	1	9430	1	1.0104	0.018093	0.068065	0.812543	1479	4	1.0104		SV2A	6	0.45979	0.64939	0.999665	10452	2	1.3756	0.027902	0.10477	0.985559	1479	4	1.3756
	SLC25A48	5	0.15995	0.31574	1	5583	1	1.0488	0.01811	0.068122	0.812543	1480	4	1.0488		AK4	9	0.35289	0.61512	0.999665	9184	3	0.37618	0.027913	0.12323	0.986979	1480	5	0.37618
	TMCO5A	5	0.054279	0.14816	0.932002	2807	3	-0.285	0.018112	0.068127	0.812543	1481	2	-0.285		YTHDF2	6	0.23019	0.42806	0.994188	6969	2	1.0443	0.027914	0.1048	0.985559	1481	4	1.0443
	FAM178B	10	0.21836	0.47539	1	6924	3	0.038993	0.018123	0.087012	0.839304	1482	4	0.038993		THSD1	3	0.41564	0.50114	0.997083	9945	1	0.039488	0.027916	0.070471	0.985559	1482	1	0.039488
	MAFA	5	0.94961	0.94979	1	16566	0	0.049008	0.018167	0.068309	0.812543	1483	2	0.049008		U2AF1	3	0.97208	0.97226	0.999665	18417	0	1.6862	0.02792	0.070481	0.985559	1483	3	1.6862
	MAP7	5	0.95673	0.95694	1	16708	0	1.0086	0.018184	0.068361	0.812543	1484	4	1.0086		ST3GAL4	12	0.36995	0.66602	0.999665	9391	4	0.7468	0.027934	0.13567	0.989756	1484	7	0.7468
	SPSB1	5	0.40183	0.55986	1	9587	2	0.65351	0.018187	0.068365	0.812543	1485	3	0.65351		OTC	3	0.024122	0.061535	0.962523	1271	2	-1.5217	0.027958	0.070559	0.985559	1485	1	-1.5217
	ITGAX	5	0.51891	0.6631	1	11205	1	1.3141	0.018195	0.0684	0.812543	1486	4	1.3141		RBM20	3	0.60383	0.62409	0.999665	12221	1	1.0587	0.028	0.07067	0.985559	1486	2	1.0587
	C7orf55	5	0.9818	0.98194	1	17314	0	0.62546	0.018196	0.068401	0.812543	1487	5	0.62546		BCL7C	3	0.67402	0.67956	0.999665	13235	1	2.8588	0.028004	0.070684	0.985559	1487	2	2.8588
	UBXN4	5	0.95805	0.95824	1	16737	0	1.3729	0.018204	0.068431	0.812543	1488	3	1.3729		MYLK4	3	0.97199	0.97216	0.999665	18415	0	2.2082	0.028014	0.070708	0.985559	1488	3	2.2082
	RBFOX2	5	0.64165	0.73166	1	12403	1	0.75101	0.018206	0.068436	0.812543	1489	3	0.75101		FNDC4	3	0.8395	0.83948	0.999665	16005	0	2.4507	0.028027	0.070726	0.985559	1489	2	2.4507
	HPGD	15	0.69178	0.89323	1	12817	4	0.38167	0.018236	0.10143	0.860236	1490	8	0.38167		PPP5C	3	0.36439	0.47231	0.997083	9321	1	0.60932	0.028042	0.070756	0.985559	1490	2	0.60932
	AK4	3	0.98175	0.9819	1	17313	0	1.0948	0.018254	0.047313	0.75374	1491	3	1.0948		ZNF266	3	0.80511	0.80503	0.999665	15424	0	2.7546	0.028042	0.070758	0.985559	1491	2	2.7546
	SHC1	5	0.82597	0.83351	1	14343	1	1.7095	0.018283	0.068685	0.814048	1492	3	1.7095		GFAP	3	0.70673	0.70852	0.999665	13750	1	2.5929	0.02805	0.07078	0.985559	1492	2	2.5929
	GALC	5	0.9817	0.98184	1	17312	0	0.76939	0.018299	0.068742	0.814184	1493	5	0.76939		TAS2R14	3	0.97192	0.9721	0.999665	18414	0	1.3379	0.028077	0.070841	0.985559	1493	3	1.3379
	MYBPC2	5	0.30769	0.47914	1	8241	1	0.34354	0.018334	0.068861	0.814444	1494	3	0.34354		SFXN3	3	0.6012	0.62215	0.999665	12180	1	2.4511	0.028081	0.070846	0.985559	1494	2	2.4511
	HAGH	5	0.98162	0.98176	1	17309	0	0.53066	0.018381	0.069007	0.814444	1495	5	0.53066		ZCCHC24	3	0.24918	0.37449	0.993545	7424	2	-0.63438	0.028126	0.07095	0.985559	1495	1	-0.63438
	CLSTN1	5	0.73348	0.77509	1	13224	1	0.59367	0.01844	0.0692	0.814444	1496	4	0.59367		C2orf16	3	0.93953	0.93971	0.999665	17816	0	2.4468	0.028142	0.070979	0.985559	1496	3	2.4468
	ELMOD3	5	0.98152	0.98166	1	17306	0	0.70662	0.018483	0.069335	0.814444	1497	5	0.70662		ETV1	12	0.037489	0.15096	0.983159	1887	3	1.0402	0.028147	0.13643	0.989756	1497	9	1.0402
	MARK2	5	0.061827	0.16087	0.937631	3037	2	-0.13888	0.0185	0.069388	0.814444	1498	2	-0.13888		C22orf29	3	0.82617	0.82611	0.999665	15783	0	2.5046	0.02815	0.071002	0.985559	1498	2	2.5046
	IRF5	5	0.61423	0.72044	1	12188	1	0.89073	0.018513	0.069434	0.814444	1499	4	0.89073		APOC2	3	0.96247	0.96269	0.999665	18222	0	2.2786	0.028158	0.071021	0.985559	1499	3	2.2786
	SMAD7	5	0.98148	0.98163	1	17305	0	0.9239	0.018522	0.069469	0.814444	1500	5	0.9239		SPNS3	3	0.20867	0.32456	0.991358	6436	2	-0.50052	0.028167	0.071044	0.985559	1500	1	-0.50052
	USP19	5	0.98145	0.98161	1	17304	0	0.44505	0.018552	0.069578	0.814444	1501	5	0.44505		MEOX1	6	0.74229	0.83382	0.999665	14371	1	1.5787	0.028173	0.10554	0.985559	1501	5	1.5787
	DYNAP	5	0.19334	0.36474	1	6339	1	0.15981	0.018555	0.069588	0.814444	1502	2	0.15981		MBNL3	10	0.10766	0.30756	0.991358	4016	5	-0.2453	0.028193	0.12671	0.987554	1502	5	-0.2453
	OPRD1	5	0.63603	0.7293	1	12360	1	0.77679	0.018557	0.069596	0.814444	1503	3	0.77679		SLAIN2	3	0.75299	0.75316	0.999665	14546	0	1.6076	0.028209	0.071153	0.985559	1503	2	1.6076
	HOXD8	10	0.29618	0.56105	1	8046	4	-0.069621	0.018566	0.08871	0.841707	1504	4	-0.069621		SYN1	3	0.97177	0.97194	0.999665	18412	0	1.336	0.028232	0.071197	0.985559	1504	3	1.336
	SOHLH1	5	0.93986	0.94005	1	16381	0	0.45535	0.018573	0.069649	0.814444	1505	4	0.45535		GAGE2A	1	0.97175	0.97185	0.999665	18411	0	2.7045	0.028251	0.028189	0.973885	1505	1	2.7045
	DHRS4	5	0.98141	0.98157	1	17303	0	0.54693	0.018592	0.069715	0.814444	1506	5	0.54693		PICK1	3	0.69419	0.69712	0.999665	13554	1	0.93134	0.028251	0.07124	0.985559	1506	2	0.93134
	RANBP17	5	0.98141	0.98157	1	17302	0	0.35621	0.018594	0.06972	0.814444	1507	5	0.35621		MYLK	6	0.70981	0.82392	0.999665	13805	1	0.88235	0.028269	0.10581	0.985559	1507	4	0.88235
	FCAMR	5	0.9814	0.98156	1	17301	0	0.79623	0.018599	0.069731	0.814444	1508	5	0.79623		TRPM8	3	0.89468	0.89476	0.999665	16969	0	2.3141	0.028289	0.071334	0.985559	1508	3	2.3141
	FANCA	5	0.51754	0.66184	1	11188	2	1.2135	0.018605	0.069755	0.814444	1509	3	1.2135		GAMT	3	0.9717	0.97187	0.999665	18408	0	2.218	0.028303	0.071377	0.985559	1509	3	2.218
	NOS2	5	0.98139	0.98156	1	17300	0	0.72153	0.018605	0.069755	0.814444	1510	5	0.72153		DGCR6	3	0.77277	0.77298	0.999665	14871	0	2.8614	0.028328	0.07143	0.985559	1510	2	2.8614
	GCNT3	5	0.3818	0.54244	1	9299	1	1.668	0.018611	0.069775	0.814444	1511	3	1.668		SERPINB13	3	0.76209	0.76237	0.999665	14696	0	2.2527	0.028343	0.071465	0.985559	1511	2	2.2527
	YIF1B	5	0.81056	0.82232	1	14120	1	0.69203	0.018618	0.06981	0.814444	1512	4	0.69203		LCK	6	0.51825	0.68725	0.999665	11157	1	1.2548	0.028351	0.10604	0.985559	1512	5	1.2548
	GMPPA	5	0.90218	0.90254	1	15640	0	0.65767	0.018645	0.069898	0.814444	1513	4	0.65767		FAM76A	3	0.97164	0.97181	0.999665	18407	0	1.466	0.028362	0.071513	0.985559	1513	3	1.466
	GRPR	5	0.1266	0.26466	0.990693	4771	2	0.017246	0.018666	0.069958	0.814444	1514	2	0.017246		FDPS	6	0.71442	0.82527	0.999665	13884	1	1.4821	0.028385	0.10615	0.985559	1514	5	1.4821
	KDELC2	5	0.89715	0.89756	1	15545	0	0.97749	0.018681	0.070016	0.814444	1515	4	0.97749		ATP1A3	6	0.96696	0.96714	0.999665	18325	0	1.0002	0.0284	0.10619	0.985559	1515	5	1.0002
	KIAA0556	5	0.78201	0.80336	1	13770	1	1.0346	0.018685	0.070028	0.814444	1516	4	1.0346		KCNAB1	9	0.11702	0.30978	0.991358	4254	5	-0.46747	0.028413	0.12482	0.986979	1516	3	-0.46747
	CYLD	5	0.95144	0.95163	1	16605	0	1.0062	0.018688	0.070037	0.814444	1517	4	1.0062		FANCL	3	0.099223	0.18447	0.983159	3792	1	2.1436	0.02849	0.071836	0.985559	1517	2	2.1436
	CASP1	13	0.28516	0.5857	1	7900	4	0.49714	0.018693	0.098275	0.858897	1518	7	0.49714		HRC	3	0.83843	0.8384	0.999665	15982	0	1.5336	0.028503	0.071864	0.985559	1518	2	1.5336
	HHIPL1	5	0.79174	0.80954	1	13890	1	0.97833	0.018694	0.070058	0.814444	1519	3	0.97833		NM_001079538	3	0.97142	0.97159	0.999665	18406	0	1.462	0.028578	0.072026	0.985559	1519	3	1.462
	KIAA2018	5	0.3366	0.50371	1	8664	1	0.81157	0.018703	0.07009	0.814444	1520	4	0.81157		SMAGP	6	0.25674	0.45916	0.996866	7600	1	1.8956	0.028607	0.10679	0.985559	1520	5	1.8956
	TVP23A	5	0.98127	0.98144	1	17299	0	1.0223	0.018726	0.070161	0.814444	1521	5	1.0223		CCBL1	3	0.11234	0.20166	0.986185	4132	2	-1.2484	0.028629	0.072155	0.985559	1521	1	-1.2484
	BEX4	5	0.84235	0.84625	1	14586	1	0.65406	0.018741	0.070209	0.814444	1522	4	0.65406		GARNL3	6	0.8865	0.89678	0.999665	16811	1	1.9601	0.028632	0.10686	0.985559	1522	4	1.9601
	FAM63A	5	0.92009	0.92042	1	15996	0	0.8529	0.018742	0.070212	0.814444	1523	4	0.8529		DFNB31	6	0.97919	0.9791	0.999665	18562	0	1.1195	0.028664	0.10695	0.985559	1523	5	1.1195
	NOV	5	0.84092	0.84509	1	14564	1	0.63466	0.01875	0.070244	0.814444	1524	4	0.63466		ATP5SL	6	0.28202	0.48815	0.997083	8164	3	0.66178	0.028738	0.10717	0.985559	1524	3	0.66178
	OTX1	5	0.98123	0.9814	1	17298	0	0.39775	0.018766	0.070295	0.814444	1525	5	0.39775		FAM217B	6	0.45817	0.64834	0.999665	10428	2	0.25304	0.028761	0.10723	0.985559	1525	3	0.25304
	FOXG1	5	0.98118	0.98134	1	17296	0	0.33136	0.018825	0.070489	0.814853	1526	5	0.33136		TMEM139	4	0.97121	0.9712	0.999665	18403	0	1.4758	0.028793	0.088648	0.985559	1526	4	1.4758
	SEC24A	5	0.98115	0.98131	1	17295	0	0.44184	0.018853	0.070584	0.814853	1527	5	0.44184		FOXN4	3	0.9712	0.97136	0.999665	18402	0	1.3672	0.028798	0.072561	0.985559	1527	3	1.3672
	SYTL1	5	0.98114	0.9813	1	17294	0	0.82336	0.018865	0.070621	0.814853	1528	5	0.82336		PDK2	9	0.3717	0.63426	0.999665	9413	1	1.8714	0.028798	0.12603	0.986979	1528	7	1.8714
	SYNE3	5	0.98112	0.98128	1	17293	0	0.4436	0.018879	0.070668	0.814853	1529	5	0.4436		BHMT2	3	0.48875	0.54515	0.997083	10788	1	2.4422	0.028817	0.072596	0.985559	1529	2	2.4422
	TPI1	9	0.33061	0.58772	1	8570	4	-0.051856	0.018884	0.088176	0.841534	1530	4	-0.051856		SLC6A3	3	0.50363	0.55472	0.997083	10959	1	0.82635	0.028838	0.072639	0.985559	1530	2	0.82635
	DLX5	5	0.98106	0.98121	1	17292	0	0.52142	0.018942	0.070878	0.814853	1531	5	0.52142		REXO1	3	0.71208	0.7134	0.999665	13844	1	0.28423	0.02888	0.072737	0.985559	1531	2	0.28423
	IGLL1	5	0.98105	0.9812	1	17291	0	0.36892	0.018954	0.070924	0.814853	1532	5	0.36892		RDH13	6	0.49429	0.67145	0.999665	10842	1	0.95957	0.028915	0.10766	0.985559	1532	5	0.95957
	PTPLAD2	5	0.70953	0.76282	1	12987	1	1.7653	0.018955	0.070926	0.814853	1533	4	1.7653		SIGLEC10	3	0.099423	0.18474	0.983159	3798	1	2.2926	0.028926	0.072846	0.985559	1533	2	2.2926
	CBX1	5	0.91696	0.91726	1	15933	0	1.1506	0.018961	0.070951	0.814853	1534	3	1.1506		VCY1B	3	0.91321	0.9133	0.999665	17311	0	2.1351	0.028989	0.072991	0.985559	1534	3	2.1351
	PTX3	5	0.35037	0.51542	1	8851	2	0.70287	0.018979	0.071019	0.814853	1535	3	0.70287		SYCE1L	3	0.971	0.97114	0.999665	18401	0	2.378	0.028995	0.073003	0.985559	1535	3	2.378
	ZNF365	11	0.94993	0.97282	1	16574	1	0.5236	0.018982	0.095038	0.854206	1536	9	0.5236		SIGLEC15	3	0.89806	0.89817	0.999665	17041	0	0.81755	0.029006	0.073026	0.985559	1536	3	0.81755
	TNNI3	5	0.96708	0.96728	1	16958	0	1.0043	0.018988	0.071054	0.814853	1537	4	1.0043		GPAA1	3	0.97099	0.97113	0.999665	18400	0	1.7662	0.029007	0.07303	0.985559	1537	3	1.7662
	APOLD1	5	0.981	0.98116	1	17290	0	0.75171	0.018996	0.071081	0.814853	1538	5	0.75171		FZD7	3	0.9472	0.9474	0.999665	17939	0	2.3775	0.029012	0.073045	0.985559	1538	3	2.3775
	ZNF774	5	0.981	0.98116	1	17289	0	0.4636	0.019003	0.071105	0.814853	1539	5	0.4636		MDK	11	0.9786	0.98496	0.999665	18544	1	0.90593	0.02903	0.13557	0.989756	1539	9	0.90593
	CEBPE	5	0.98094	0.9811	1	17288	0	0.3695	0.019058	0.071301	0.814865	1540	5	0.3695		ATP8B1	3	0.97095	0.97109	0.999665	18398	0	1.8236	0.029047	0.073132	0.985559	1540	3	1.8236
	AGTR1	5	0.98091	0.98108	1	17287	0	0.42161	0.019086	0.071381	0.814865	1541	5	0.42161		ELOVL2	3	0.4921	0.54734	0.997083	10826	1	0.41792	0.029048	0.073134	0.985559	1541	2	0.41792
	CCDC137	5	0.82772	0.83483	1	14367	1	0.84162	0.019103	0.071432	0.814865	1542	4	0.84162		FN1	3	0.97095	0.97109	0.999665	18397	0	2.8507	0.029052	0.073144	0.985559	1542	3	2.8507
	AKAP9	5	0.021211	0.066877	0.808926	1473	2	0.60973	0.019109	0.071456	0.814865	1543	3	0.60973		KRTAP13-4	3	0.97092	0.97105	0.999665	18396	0	1.3863	0.029084	0.073229	0.985559	1543	3	1.3863
	GRPEL2	5	0.36298	0.52617	1	9038	1	0.79731	0.019131	0.071528	0.814865	1544	3	0.79731		ANKRD30A	3	0.97088	0.97102	0.999665	18395	0	1.59	0.02912	0.073309	0.985559	1544	3	1.59
	ERC2	5	0.12262	0.25839	0.990693	4668	1	0.84442	0.019134	0.071536	0.814865	1545	3	0.84442		TXNRD3	3	0.84792	0.84792	0.999665	16139	0	2.0375	0.029122	0.073312	0.985559	1545	2	2.0375
	SEL1L3	5	0.98084	0.98101	1	17285	0	0.35227	0.019164	0.071635	0.814865	1546	5	0.35227		ZNF320	3	0.17634	0.28378	0.991358	5698	1	0.31196	0.029131	0.073337	0.985559	1546	2	0.31196
	DNAAF2	5	0.87522	0.87573	1	15140	1	0.87203	0.019172	0.071656	0.814865	1547	3	0.87203		EPS15	6	0.13218	0.30853	0.991358	4644	2	0.35101	0.02914	0.10828	0.985559	1547	3	0.35101
	TSPAN8	5	0.98083	0.981	1	17284	0	0.69152	0.019172	0.071656	0.814865	1548	5	0.69152		TYW5	3	0.95589	0.95618	0.999665	18112	0	2.392	0.029161	0.073405	0.985559	1548	3	2.392
	TOP1MT	5	0.98081	0.98098	1	17283	0	0.56774	0.019191	0.071715	0.814865	1549	5	0.56774		ATXN7L1	6	0.31392	0.52454	0.997083	8770	2	0.60625	0.029165	0.10835	0.985559	1549	4	0.60625
	ZNF346	5	0.86797	0.86864	1	15005	1	0.91261	0.01922	0.071832	0.814865	1550	3	0.91261		GRID2	3	0.33875	0.45837	0.996866	9024	1	0.44864	0.029173	0.073428	0.985559	1550	2	0.44864
	ITGAM	5	0.98077	0.98093	1	17282	0	0.93058	0.019226	0.071846	0.814865	1551	5	0.93058		ZNF287	3	0.39279	0.48801	0.997083	9678	1	2.4914	0.029192	0.073478	0.985559	1551	2	2.4914
	HOXA3	5	0.95982	0.95998	1	16777	0	0.73692	0.01924	0.071892	0.814865	1552	4	0.73692		SH2D4A	6	0.89018	0.89918	0.999665	16879	1	0.1464	0.029223	0.1085	0.985559	1552	3	0.1464
	ATXN7L2	5	0.31107	0.48201	1	8288	1	0.64699	0.019268	0.071993	0.814865	1553	4	0.64699		KLRC3	3	0.97076	0.9709	0.999665	18394	0	1.2402	0.029238	0.073574	0.985559	1553	3	1.2402
	ZNF592	5	0.98073	0.98089	1	17280	0	0.73459	0.019274	0.072011	0.814865	1554	5	0.73459		FGF21	3	0.046456	0.11231	0.974719	2277	1	2.1754	0.029247	0.073595	0.985559	1554	2	2.1754
	TGFBI	5	0.97461	0.97477	1	17121	0	0.58504	0.019275	0.072013	0.814865	1555	5	0.58504		PPARA	3	0.97075	0.97089	0.999665	18393	0	1.35	0.029254	0.073615	0.985559	1555	3	1.35
	VIL1	5	0.98068	0.98085	1	17279	0	0.88256	0.019317	0.072173	0.81603	1556	5	0.88256		CBWD3	3	0.91106	0.91112	0.999665	17266	0	1.6475	0.029255	0.073618	0.985559	1556	3	1.6475
	UPK2	5	0.1587	0.31386	1	5550	3	-0.20582	0.01933	0.072207	0.81603	1557	2	-0.20582		TMEM39A	3	0.44805	0.52017	0.997083	10309	1	2.0196	0.029271	0.073654	0.985559	1557	2	2.0196
	DNAJC11	5	0.98065	0.98082	1	17278	0	0.62802	0.019346	0.072263	0.816158	1558	5	0.62802		C19orf68	3	0.86535	0.86536	0.999665	16442	0	2.6451	0.029294	0.073712	0.985559	1558	2	2.6451
	SKOR2	5	0.25992	0.43911	1	7551	1	0.71832	0.019394	0.072414	0.817353	1559	4	0.71832		DENND4C	3	0.29091	0.42532	0.994188	8371	1	2.0932	0.029388	0.073931	0.985559	1559	2	2.0932
	HMGXB3	5	0.80287	0.81692	1	14021	1	0.32117	0.019441	0.072564	0.81845	1560	3	0.32117		NAT8	3	0.3136	0.44512	0.995666	8764	1	1.9588	0.029396	0.073947	0.985559	1560	2	1.9588
	TMEM18	5	0.98053	0.98069	1	17277	0	0.52286	0.019473	0.072672	0.81845	1561	5	0.52286		KCTD3	3	0.96521	0.96539	0.999665	18284	0	2.4668	0.029404	0.07396	0.985559	1561	3	2.4668
	IQGAP3	5	0.98049	0.98065	1	17276	0	0.48383	0.019509	0.072797	0.81845	1562	5	0.48383		WRAP53	9	0.44881	0.70312	0.999665	10318	2	1.1831	0.029453	0.1281	0.989182	1562	7	1.1831
	ADAM29	5	0.98048	0.98064	1	17275	0	0.79863	0.019519	0.072825	0.81845	1563	5	0.79863		GMEB1	3	0.63142	0.64512	0.999665	12617	1	2.5795	0.029466	0.074109	0.985559	1563	2	2.5795
	S100A12	5	0.97302	0.97314	1	17080	0	0.86732	0.01952	0.072828	0.81845	1564	4	0.86732		TTC1	3	0.12956	0.2239	0.988233	4576	2	-0.8042	0.029508	0.074203	0.985559	1564	1	-0.8042
	MTRF1L	4	0.98046	0.98054	1	17274	0	1.0257	0.019536	0.062501	0.799013	1565	4	1.0257		ZG16	3	0.097302	0.18193	0.983159	3726	2	-1.6913	0.02955	0.0743	0.985559	1565	1	-1.6913
	DCHS1	5	0.045613	0.12993	0.911739	2524	1	0.36097	0.019538	0.072883	0.81845	1566	4	0.36097		NPAS1	3	0.97044	0.97059	0.999665	18390	0	2.4751	0.029559	0.07432	0.985559	1566	3	2.4751
	SLC35E4	5	0.98046	0.98062	1	17273	0	0.53221	0.01954	0.072887	0.81845	1567	5	0.53221		CRHR2	6	0.15047	0.3324	0.991358	5075	3	0.23406	0.029582	0.10952	0.985559	1567	3	0.23406
	P2RX6	5	0.40597	0.56348	1	9647	2	0.092677	0.019552	0.072923	0.81845	1568	2	0.092677		BAHCC1	1	0.97041	0.97056	0.999665	18389	0	3.89	0.02959	0.029516	0.973885	1568	1	3.89
	LRP11	5	0.98044	0.9806	1	17272	0	0.41767	0.019562	0.07296	0.81845	1569	5	0.41767		EIF1	3	0.62138	0.63727	0.999665	12460	1	0.601	0.029592	0.074392	0.985559	1569	2	0.601
	TRAPPC5	5	0.98038	0.98054	1	17271	0	0.97234	0.019618	0.073148	0.81845	1570	5	0.97234		OR6C3	3	0.97033	0.97047	0.999665	18388	0	1.74	0.029674	0.074586	0.985559	1570	3	1.74
	CYP11A1	5	0.98037	0.98052	1	17270	0	0.5246	0.019632	0.073189	0.81845	1571	5	0.5246		NGB	3	0.91467	0.91473	0.999665	17338	0	2.7906	0.029704	0.074664	0.985559	1571	3	2.7906
	VAMP7	5	0.39218	0.55141	1	9447	1	1.176	0.019634	0.073191	0.81845	1572	4	1.176		EP400	3	0.098147	0.18304	0.983159	3762	1	2.5909	0.029718	0.074697	0.985559	1572	2	2.5909
	PXK	5	0.87546	0.87596	1	15147	1	0.29936	0.019638	0.073209	0.81845	1573	3	0.29936		SEC22C	6	0.21383	0.40897	0.994188	6562	3	0.50063	0.029748	0.10999	0.985559	1573	3	0.50063
	PARK2	5	0.95539	0.95559	1	16686	0	0.91711	0.01965	0.073244	0.81845	1574	4	0.91711		PM20D1	3	0.64916	0.65916	0.999665	12883	1	2.7249	0.029759	0.074797	0.985559	1574	2	2.7249
	C6orf136	12	0.35563	0.64689	1	8931	5	0.071257	0.019659	0.099752	0.859074	1575	6	0.071257		FABP2	3	0.26418	0.39283	0.994188	7774	1	2.0626	0.029799	0.074878	0.985559	1575	2	2.0626
	SLC25A42	5	0.59806	0.71409	1	12072	1	0.67658	0.019659	0.073272	0.81845	1576	4	0.67658		SNIP1	3	0.15876	0.2613	0.989799	5271	1	1.0548	0.029802	0.074882	0.985559	1576	2	1.0548
	CHRNA3	5	0.96744	0.96764	1	16966	0	0.56324	0.019662	0.073285	0.81845	1577	4	0.56324		FAM47E	3	0.97018	0.97034	0.999665	18386	0	1.849	0.029821	0.074929	0.985559	1577	3	1.849
	KRTAP4-5	3	0.98027	0.98039	1	17267	0	0.71611	0.019733	0.050847	0.762135	1578	3	0.71611		ZNF667	3	0.157	0.25907	0.989799	5219	1	2.7036	0.029822	0.074932	0.985559	1578	2	2.7036
	PDP2	5	0.79653	0.81268	1	13945	1	0.66171	0.019749	0.073582	0.820499	1579	4	0.66171		SEMA3G	3	0.95701	0.95729	0.999665	18137	0	2.2868	0.029843	0.074976	0.985559	1579	3	2.2868
	MON1B	5	0.85791	0.85935	1	14835	1	0.73829	0.019765	0.073632	0.820499	1580	4	0.73829		UGCG	3	0.97013	0.97028	0.999665	18385	0	1.436	0.029875	0.075042	0.985559	1580	3	1.436
	TXNRD1	4	0.98019	0.98027	1	17266	0	1.0231	0.019806	0.063264	0.799013	1581	4	1.0231		LRRC8C	3	0.91792	0.91801	0.999665	17392	0	1.4868	0.029927	0.07515	0.985559	1581	3	1.4868
	GRIK1	5	0.54161	0.6837	1	11523	1	0.5685	0.019833	0.073863	0.821209	1582	4	0.5685		SHISA5	12	0.31473	0.61269	0.999665	8777	3	0.84714	0.029959	0.14279	0.995156	1582	8	0.84714
	COX8C	4	0.90146	0.90108	1	15620	0	0.86178	0.019837	0.063354	0.799013	1583	3	0.86178		PRKAR1A	11	0.31172	0.60026	0.999665	8741	5	0.50877	0.029971	0.13915	0.993883	1583	6	0.50877
	TBX20	5	0.9605	0.96064	1	16803	0	0.59157	0.019871	0.073987	0.821209	1584	4	0.59157		TMEM239	3	0.97003	0.97019	0.999665	18383	0	1.3388	0.029974	0.075255	0.985559	1584	3	1.3388
	HTR1E	5	0.9801	0.98026	1	17265	0	0.86529	0.019895	0.074075	0.821209	1585	5	0.86529		CECR2	3	0.96997	0.97013	0.999665	18382	0	1.3041	0.030027	0.075371	0.985559	1585	3	1.3041
	NTN4	5	0.43487	0.58857	1	10070	2	0.07727	0.01991	0.074112	0.821209	1586	2	0.07727		NRARP	3	0.96997	0.97013	0.999665	18381	0	1.8685	0.030031	0.075382	0.985559	1586	3	1.8685
	MSRA	5	0.78476	0.80514	1	13797	1	0.64321	0.019915	0.074127	0.821209	1587	4	0.64321		NUDT14	3	0.57868	0.60554	0.999665	11889	1	2.3789	0.030084	0.075524	0.985559	1587	2	2.3789
	GTSF1L	5	0.39541	0.55428	1	9508	2	0.43298	0.019939	0.074209	0.821209	1588	3	0.43298		SLC23A1	3	0.23657	0.35897	0.992088	7110	1	1.8549	0.030095	0.07555	0.985559	1588	2	1.8549
	DDIT3	7	0.95533	0.95534	1	16684	0	0.29009	0.019961	0.081896	0.832542	1589	3	0.29009		SEBOX	3	0.68774	0.69146	0.999665	13447	1	2.1887	0.030116	0.075595	0.985559	1589	2	2.1887
	CUL7	5	0.55612	0.69703	1	11741	1	0.96142	0.019982	0.074334	0.821209	1590	3	0.96142		C20orf194	3	0.96984	0.97	0.999665	18380	0	1.6664	0.030164	0.075707	0.985559	1590	3	1.6664
	KRT222	5	0.90243	0.90278	1	15647	0	0.15561	0.019994	0.074378	0.821209	1591	2	0.15561		MAPK8IP3	3	0.96981	0.96997	0.999665	18379	0	2.0589	0.030189	0.075771	0.985559	1591	3	2.0589
	ABCG4	5	0.96051	0.96065	1	16804	0	0.83376	0.019996	0.074383	0.821209	1592	4	0.83376		SLC43A3	7	0.15616	0.35042	0.991358	5205	2	0.35807	0.030207	0.11718	0.985559	1592	4	0.35807
	GP9	5	0.015005	0.049707	0.761258	1157	1	0.91971	0.020001	0.074398	0.821209	1593	4	0.91971		PIAS2	3	0.91381	0.91388	0.999665	17327	0	2.6863	0.030211	0.075822	0.985559	1593	3	2.6863
	ELTD1	3	0.56552	0.58678	1	11845	1	1.6045	0.020026	0.051577	0.762396	1594	2	1.6045		TBXA2R	3	0.71612	0.71713	0.999665	13915	1	2.243	0.030227	0.075853	0.985559	1594	2	2.243
	HES6	10	0.44768	0.70612	1	10245	1	0.44669	0.02005	0.094342	0.852466	1595	7	0.44669		MOCS1	6	0.86994	0.88698	0.999665	16526	1	1.3874	0.030258	0.11142	0.985559	1595	5	1.3874
	ZAP70	5	0.96161	0.96178	1	16833	0	0.71819	0.020056	0.074593	0.822853	1596	3	0.71819		CD93	3	0.74132	0.74145	0.999665	14351	1	-0.2354	0.030262	0.075927	0.985559	1596	1	-0.2354
	CAV2	6	0.094463	0.23597	0.987517	3933	3	-0.30514	0.020104	0.078143	0.828021	1597	2	-0.30514		OR51S1	3	0.13217	0.22728	0.988233	4643	1	2.659	0.030283	0.075965	0.985559	1597	2	2.659
	CDH18	5	0.052311	0.14478	0.927289	2754	2	-0.0084327	0.020105	0.074766	0.823607	1598	2	-0.0084327		VPS39	3	0.37	0.47537	0.997083	9393	1	2.3638	0.030291	0.075985	0.985559	1598	2	2.3638
	C3orf27	5	0.97988	0.98004	1	17262	0	0.60794	0.020122	0.074819	0.823607	1599	5	0.60794		LINGO2	6	0.50635	0.67944	0.999665	10996	2	0.4492	0.030332	0.11163	0.985559	1599	4	0.4492
	SYT1	5	0.38638	0.5464	1	9367	1	0.3893	0.02013	0.074844	0.823607	1600	3	0.3893		ZNF717	6	0.70701	0.8225	0.999665	13755	2	1.5406	0.030343	0.11167	0.985559	1600	4	1.5406
	MPP4	5	0.97983	0.98	1	17260	0	0.25062	0.020166	0.074964	0.824221	1601	5	0.25062		PREPL	12	0.8593	0.95132	0.999665	16330	2	1.002	0.030358	0.14418	0.995419	1601	8	1.002
	UMODL1	5	0.22002	0.40284	1	6958	1	0.47777	0.020185	0.075037	0.824221	1602	4	0.47777		CTAGE1	3	0.39866	0.49133	0.997083	9742	1	0.87214	0.030388	0.076192	0.985559	1602	2	0.87214
	GPR50	5	0.89366	0.89409	1	15490	0	0.13125	0.020203	0.075085	0.824221	1603	2	0.13125		OR10G2	3	0.9696	0.96977	0.999665	18377	0	1.3699	0.030396	0.076214	0.985559	1603	3	1.3699
	TTYH1	5	0.97978	0.97994	1	17258	0	0.58981	0.020218	0.075134	0.824221	1604	5	0.58981		IER3IP1	3	0.90145	0.90153	0.999665	17102	0	2.4958	0.030443	0.076313	0.985559	1604	3	2.4958
	LCN1	5	0.97977	0.97993	1	17257	0	0.74946	0.020231	0.075175	0.824221	1605	5	0.74946		CRYGA	3	0.38643	0.48455	0.997083	9604	1	2.0873	0.030451	0.076327	0.985559	1605	2	2.0873
	SLC22A3	5	0.26902	0.44676	1	7676	2	0.8395	0.020265	0.07528	0.824632	1606	3	0.8395		RPS6KL1	3	0.96954	0.96971	0.999665	18376	0	1.1328	0.030459	0.076346	0.985559	1606	3	1.1328
	C14orf93	5	0.82207	0.83063	1	14287	1	0.014298	0.020286	0.07535	0.824632	1607	2	0.014298		OR4D2	3	0.96951	0.96967	0.999665	18375	0	1.579	0.030488	0.076415	0.985559	1607	3	1.579
	KHDC1	5	0.97969	0.97985	1	17256	0	0.51336	0.02031	0.075432	0.824782	1608	5	0.51336		ATP6V1F	3	0.86068	0.86067	0.999665	16359	0	2.3467	0.030603	0.076674	0.985559	1608	2	2.3467
	MED8	5	0.30748	0.47899	1	8238	2	0.91633	0.020332	0.075506	0.824782	1609	3	0.91633		CBR4	3	0.21466	0.33198	0.991358	6581	2	-0.5123	0.030639	0.076763	0.985559	1609	1	-0.5123
	LPHN2	4	0.97964	0.97972	1	17255	0	0.83174	0.020362	0.064894	0.803038	1610	4	0.83174		CCDC132	3	0.3109	0.4437	0.995666	8729	1	2.4389	0.030699	0.076913	0.985559	1610	2	2.4389
	SLC27A3	5	0.95851	0.95868	1	16746	0	0.87891	0.020372	0.075649	0.824782	1611	4	0.87891		DOC2A	11	0.27916	0.56285	0.997083	8090	2	0.82983	0.030705	0.14196	0.995156	1611	9	0.82983
	C5orf64	5	0.97963	0.97978	1	17254	0	0.51929	0.020375	0.075661	0.824782	1612	5	0.51929		STH	3	0.70775	0.70945	0.999665	13772	1	0.29418	0.030722	0.076966	0.985559	1612	2	0.29418
	CXCR5	5	0.89865	0.89905	1	15571	0	0.73362	0.020375	0.075662	0.824782	1613	4	0.73362		PPM1B	3	0.96927	0.96946	0.999665	18374	0	1.7268	0.030726	0.076974	0.985559	1613	3	1.7268
	TTLL4	5	0.67614	0.7468	1	12683	1	0.10704	0.020378	0.075669	0.824782	1614	2	0.10704		CCZ1	2	0.94192	0.94181	0.999665	17847	0	2.9255	0.030739	0.05621	0.985559	1614	2	2.9255
	KDM4A	5	0.8643	0.86517	1	14947	1	0.27689	0.020382	0.075684	0.824782	1615	3	0.27689		TELO2	3	0.91016	0.91025	0.999665	17252	0	2.3809	0.030763	0.077048	0.985559	1615	3	2.3809
	ALS2CL	10	0.15061	0.36999	1	5350	4	0.74645	0.020402	0.095677	0.856099	1616	6	0.74645		C10orf55	3	0.6868	0.69066	0.999665	13428	1	-0.16313	0.030764	0.077052	0.985559	1616	1	-0.16313
	NFRKB	5	0.19055	0.36073	1	6265	1	0.90882	0.020474	0.075998	0.825488	1617	4	0.90882		SYDE2	3	0.69187	0.69505	0.999665	13509	1	3.1043	0.030804	0.077151	0.985559	1617	2	3.1043
	DES	5	0.95731	0.9575	1	16723	0	0.90701	0.02048	0.076017	0.825488	1618	4	0.90701		ASCL4	3	0.96919	0.96937	0.999665	18372	0	1.4699	0.030806	0.077154	0.985559	1618	3	1.4699
	CBLN1	5	0.46875	0.61827	1	10524	1	0.32008	0.020492	0.076058	0.825488	1619	3	0.32008		MVD	3	0.96918	0.96935	0.999665	18371	0	1.1769	0.030823	0.07719	0.985559	1619	3	1.1769
	ST14	5	0.52337	0.66714	1	11262	1	0.75119	0.020496	0.076075	0.825488	1620	4	0.75119		LRRC30	3	0.96914	0.96932	0.999665	18370	0	1.152	0.030865	0.077297	0.985559	1620	3	1.152
	ARHGEF37	5	0.97949	0.97964	1	17251	0	0.41164	0.020508	0.076111	0.825488	1621	5	0.41164		BYSL	3	0.96911	0.9693	0.999665	18368	0	1.1246	0.03089	0.077351	0.985559	1621	3	1.1246
	TBCEL	4	0.24605	0.38318	1	7377	2	0.33713	0.020508	0.065322	0.803741	1622	2	0.33713		EEF1G	3	0.9691	0.96928	0.999665	18366	0	1.2369	0.030903	0.07738	0.985559	1622	3	1.2369
	PSPN	5	0.61919	0.7224	1	12230	1	0.73252	0.020519	0.07615	0.825488	1623	4	0.73252		PAQR4	6	0.52385	0.69098	0.999665	11231	1	0.84679	0.030917	0.11325	0.985559	1623	4	0.84679
	CDK10	5	0.97945	0.9796	1	17249	0	0.92227	0.020545	0.076242	0.825488	1624	5	0.92227		SLC30A4	3	0.24634	0.37097	0.992996	7356	1	-0.13428	0.030932	0.077452	0.985559	1624	1	-0.13428
	CENPU	5	0.74079	0.77905	1	13302	1	0.2434	0.020548	0.076244	0.825488	1625	3	0.2434		PTBP3	6	0.93736	0.93742	0.999665	17762	0	0.91231	0.030933	0.11329	0.985559	1625	5	0.91231
	MEGF11	5	0.88146	0.8819	1	15263	0	0.96956	0.020551	0.076253	0.825488	1626	4	0.96956		ZMYND10	3	0.96904	0.96923	0.999665	18365	0	1.3528	0.030962	0.077517	0.985559	1626	3	1.3528
	SURF1	5	0.9794	0.97954	1	17248	0	0.8161	0.020598	0.076411	0.826423	1627	5	0.8161		LOC339862	3	0.86188	0.86187	0.999665	16381	0	1.8808	0.030964	0.077521	0.985559	1627	2	1.8808
	PRCD	2	0.9794	0.97928	1	17247	0	1.1111	0.020599	0.038216	0.706869	1628	2	1.1111		PDE2A	9	0.69157	0.8589	0.999665	13505	3	1.1747	0.030985	0.13295	0.989756	1628	6	1.1747
	SLC6A8	5	0.85809	0.85951	1	14839	1	0.22972	0.020603	0.076431	0.826423	1629	3	0.22972		FBXL14	3	0.96896	0.96916	0.999665	18363	0	2.2792	0.031037	0.077684	0.985559	1629	3	2.2792
	GREM1	6	0.86191	0.87402	1	14902	1	0.85171	0.02061	0.079649	0.831377	1630	5	0.85171		LRFN2	3	0.46804	0.53225	0.997083	10545	1	2.4664	0.031061	0.07774	0.985559	1630	2	2.4664
	FGF5	5	0.12337	0.25953	0.990693	4686	3	-0.3043	0.020627	0.076508	0.826759	1631	2	-0.3043		CDC25C	6	0.047373	0.14019	0.983159	2310	3	0.22054	0.031062	0.11365	0.985559	1631	3	0.22054
	JMJD8	5	0.96591	0.96611	1	16932	0	0.63591	0.020669	0.076656	0.827159	1632	4	0.63591		SLC47A1	3	0.61914	0.63558	0.999665	12428	1	2.1231	0.031069	0.077754	0.985559	1632	2	2.1231
	CABP2	5	0.97931	0.97945	1	17244	0	0.30886	0.020694	0.076741	0.827159	1633	5	0.30886		MAGEH1	3	0.96698	0.96717	0.999665	18327	0	2.2132	0.03111	0.077852	0.985559	1633	3	2.2132
	CHST1	5	0.088947	0.20528	0.966693	3783	1	0.67709	0.020701	0.076755	0.827159	1634	4	0.67709		MMRN2	3	0.61016	0.62878	0.999665	12320	1	3.034	0.031118	0.077869	0.985559	1634	2	3.034
	RGS11	5	0.97926	0.97941	1	17243	0	0.87212	0.020742	0.076901	0.827159	1635	5	0.87212		RALGDS	12	0.1623	0.4159	0.994188	5373	5	0.21613	0.031162	0.14693	0.997302	1635	6	0.21613
	LGALS16	5	0.37822	0.53934	1	9252	2	1.2073	0.020748	0.076916	0.827159	1636	3	1.2073		PIANP	6	0.004415	0.019438	0.962523	264	3	-0.59862	0.031164	0.11393	0.985559	1636	2	-0.59862
	DYSF	5	0.92696	0.92723	1	16133	0	0.15803	0.020766	0.076971	0.827159	1637	3	0.15803		AIMP1	8	0.37799	0.62479	0.999665	9493	2	1.2756	0.031186	0.12975	0.989485	1637	6	1.2756
	BLOC1S4	5	0.9792	0.97934	1	17242	0	0.34294	0.020803	0.077095	0.827159	1638	5	0.34294		MRPS35	3	0.96879	0.96898	0.999665	18362	0	1.4086	0.031211	0.078088	0.985559	1638	3	1.4086
	HES5	5	0.97918	0.97933	1	17241	0	0.4036	0.020818	0.077149	0.827159	1639	5	0.4036		PSIP1	6	0.24721	0.44807	0.996744	7378	1	1.4524	0.031222	0.11409	0.985559	1639	5	1.4524
	CNN2	4	0.91351	0.91328	1	15871	0	0.60768	0.020818	0.06618	0.807148	1640	3	0.60768		KRT38	3	0.086812	0.16813	0.983159	3416	1	0.90789	0.031266	0.078207	0.985559	1640	2	0.90789
	RUNX1T1	5	0.97918	0.97933	1	17240	0	0.59794	0.020821	0.077155	0.827159	1641	5	0.59794		DNAAF5	3	0.9687	0.96889	0.999665	18361	0	2.1535	0.0313	0.078286	0.985559	1641	3	2.1535
	BPI	5	0.057494	0.15366	0.936563	2899	3	-0.19432	0.02084	0.077219	0.827159	1642	2	-0.19432		ZNF277	3	0.96867	0.96886	0.999665	18360	0	1.6891	0.031334	0.078355	0.985559	1642	3	1.6891
	EDAR	5	0.56656	0.70232	1	11858	1	0.40553	0.020859	0.077268	0.827159	1643	3	0.40553		ITGB2	4	0.96862	0.9686	0.999665	18359	0	0.77641	0.031381	0.095752	0.985559	1643	4	0.77641
	EPYC	5	0.41034	0.56728	1	9725	2	1.0281	0.020861	0.077275	0.827159	1644	3	1.0281		TPBGL	3	0.96859	0.96877	0.999665	18358	0	2.1249	0.03141	0.078516	0.985559	1644	3	2.1249
	HLA-DQB2	5	0.10398	0.22935	0.982129	4171	1	0.62336	0.020863	0.077281	0.827159	1645	4	0.62336		TBC1D30	3	0.4252	0.50669	0.997083	10046	1	-0.10835	0.031434	0.078563	0.985559	1645	1	-0.10835
	VWA3A	5	0.18302	0.34969	1	6099	1	0.70705	0.020892	0.077378	0.827199	1646	4	0.70705		C2orf44	3	0.29825	0.43425	0.995281	8541	1	2.506	0.031458	0.078622	0.985559	1646	2	2.506
	DCST2	5	0.94764	0.94783	1	16531	0	0.80625	0.020899	0.077407	0.827199	1647	4	0.80625		EPS8L3	3	0.45312	0.52316	0.997083	10364	1	2.5502	0.031482	0.078687	0.985559	1647	2	2.5502
	SNX20	5	0.81412	0.82493	1	14168	1	0.71211	0.020918	0.077464	0.827199	1648	4	0.71211		ZNF540	6	0.92636	0.92682	0.999665	17545	1	0.26416	0.031497	0.11487	0.985559	1648	4	0.26416
	KY	5	0.97908	0.97923	1	17238	0	0.54708	0.020922	0.077484	0.827199	1649	5	0.54708		PANK3	3	0.96848	0.96866	0.999665	18357	0	1.8241	0.031521	0.078774	0.985559	1649	3	1.8241
	ACOX2	5	0.97905	0.97921	1	17236	0	0.72759	0.020945	0.07756	0.827199	1650	5	0.72759		TIRAP	3	0.96459	0.96478	0.999665	18268	0	2.3781	0.031555	0.078859	0.985559	1650	3	2.3781
	CYCS	4	0.97904	0.97911	1	17235	0	1.2625	0.02096	0.066583	0.808642	1651	4	1.2625		DBI	12	0.93445	0.97355	0.999665	17714	1	0.9832	0.031561	0.14831	0.997831	1651	9	0.9832
	HYKK	4	0.97903	0.97911	1	17234	0	0.73702	0.020968	0.066602	0.808642	1652	4	0.73702		GLO1	3	0.37485	0.47803	0.997083	9446	1	2.1036	0.031579	0.078925	0.985559	1652	2	2.1036
	FIG4	5	0.97896	0.97911	1	17233	0	0.85172	0.021042	0.077878	0.827762	1653	5	0.85172		HSBP1L1	3	0.96841	0.96858	0.999665	18356	0	1.2155	0.031594	0.078953	0.985559	1653	3	1.2155
	C1QTNF2	5	0.76791	0.79464	1	13612	1	0.20045	0.021055	0.077918	0.827762	1654	3	0.20045		POM121L12	3	0.96838	0.96856	0.999665	18355	0	1.3174	0.031619	0.079001	0.985559	1654	3	1.3174
	SV2B	5	0.41989	0.57545	1	9867	1	0.98475	0.021061	0.077935	0.827762	1655	4	0.98475		COL20A1	3	0.96834	0.96851	0.999665	18354	0	1.9794	0.031658	0.079089	0.985559	1655	3	1.9794
	MAS1	5	0.78939	0.80806	1	13860	1	0.58747	0.021064	0.077946	0.827762	1656	4	0.58747		NUF2	3	0.037872	0.093193	0.974719	1904	2	-1.4795	0.031685	0.079153	0.985559	1656	1	-1.4795
	SCN4B	10	0.63785	0.82457	1	12376	1	0.66034	0.021078	0.098228	0.858897	1657	8	0.66034		C1orf86	9	0.68297	0.85318	0.999665	13374	2	1.0933	0.031707	0.13525	0.989756	1657	7	1.0933
	IGLON5	5	0.91541	0.91568	1	15904	0	1.0735	0.021089	0.078029	0.827762	1658	3	1.0735		FBXW10	3	0.14913	0.249	0.989799	5047	1	1.9172	0.031727	0.079261	0.985559	1658	2	1.9172
	CELSR3	5	0.97891	0.97906	1	17232	0	0.77178	0.021094	0.078049	0.827762	1659	5	0.77178		ACTR8	3	0.96826	0.96843	0.999665	18352	0	1.0239	0.031739	0.079283	0.985559	1659	3	1.0239
	UGT1A1	5	0.9789	0.97905	1	17231	0	0.34431	0.021101	0.078073	0.827762	1660	5	0.34431		PIK3C2B	3	0.46698	0.53158	0.997083	10527	1	1.1636	0.03181	0.079439	0.985559	1660	2	1.1636
	PRCP	5	0.97887	0.97902	1	17230	0	0.52949	0.021132	0.07819	0.828029	1661	5	0.52949		SIGIRR	6	0.88035	0.89299	0.999665	16702	1	0.67009	0.03183	0.11581	0.985559	1661	4	0.67009
	KLHDC7A	5	0.97882	0.97897	1	17229	0	0.57609	0.021184	0.078363	0.828733	1662	5	0.57609		AKAP12	6	0.3578	0.57349	0.999126	9238	1	1.1107	0.031843	0.11585	0.985559	1662	5	1.1107
	EPS15L1	5	0.74705	0.7826	1	13364	1	0.5069	0.021195	0.078401	0.828733	1663	4	0.5069		RAB3IP	6	0.6762	0.79895	0.999665	13270	1	1.2611	0.031848	0.11586	0.985559	1663	4	1.2611
	DISP2	5	0.80005	0.81504	1	13988	1	0.61757	0.021242	0.078552	0.828733	1664	4	0.61757		TSPAN16	3	0.96811	0.96829	0.999665	18351	0	1.236	0.031893	0.079623	0.985559	1664	3	1.236
	SORBS1	5	0.2769	0.45339	1	7777	1	1.0933	0.02125	0.078581	0.828733	1665	4	1.0933		BANF2	6	0.76342	0.84088	0.999665	14720	1	1.3904	0.031933	0.11612	0.985559	1665	5	1.3904
	PFDN1	3	0.97874	0.9789	1	17228	0	1.2933	0.021261	0.054702	0.77118	1666	3	1.2933		OR10J1	3	0.93836	0.93856	0.999665	17790	0	1.6163	0.031936	0.079726	0.985559	1666	3	1.6163
	VEGFA	17	0.55197	0.83585	1	11671	4	0.34759	0.021263	0.11918	0.887683	1667	12	0.34759		ZNF676	3	0.36918	0.4749	0.997083	9384	1	2.3702	0.031938	0.079731	0.985559	1667	2	2.3702
	ESD	5	0.97874	0.97888	1	17227	0	0.95668	0.021264	0.07863	0.828733	1668	5	0.95668		AMER3	9	0.98528	0.98549	0.999665	18675	0	0.32157	0.031948	0.13598	0.989756	1668	5	0.32157
	RCBTB2	5	0.016268	0.053307	0.774463	1215	3	-1.1645	0.021266	0.078637	0.828733	1669	2	-1.1645		OR2T35	3	0.0040751	0.011246	0.962523	241	1	0.7573	0.031977	0.079827	0.985559	1669	2	0.7573
	CCDC106	5	0.15867	0.31383	1	5548	2	0.017177	0.021289	0.078704	0.828733	1670	2	0.017177		RPS19BP1	3	0.46801	0.53223	0.997083	10544	1	2.2059	0.031979	0.079829	0.985559	1670	2	2.2059
	B3GNT8	5	0.85679	0.85836	1	14813	1	0.76074	0.021293	0.078717	0.828733	1671	4	0.76074		GPATCH3	3	0.96802	0.9682	0.999665	18349	0	1.1717	0.031979	0.079829	0.985559	1671	3	1.1717
	IVL	5	0.97867	0.97882	1	17226	0	0.26491	0.021326	0.078807	0.828923	1672	5	0.26491		BANK1	6	0.050723	0.14744	0.983159	2423	3	-0.23368	0.031996	0.11629	0.985559	1672	2	-0.23368
	FBXO9	5	0.97372	0.97385	1	17094	0	0.80699	0.021339	0.078858	0.828923	1673	4	0.80699		ZNF417	3	0.96799	0.96815	0.999665	18348	0	2.312	0.032014	0.079916	0.985559	1673	3	2.312
	FOXI1	5	0.74452	0.78114	1	13339	1	0.57192	0.021346	0.078873	0.828923	1674	4	0.57192		SLAMF8	3	0.86314	0.86314	0.999665	16402	0	1.0901	0.032019	0.079927	0.985559	1674	2	1.0901
	ZNF573	4	0.63249	0.67545	1	12333	1	0.27023	0.021349	0.067717	0.811489	1675	2	0.27023		CNR2	3	0.70675	0.70854	0.999665	13751	1	0.15153	0.032061	0.080029	0.985559	1675	1	0.15153
	DIXDC1	5	0.75597	0.7876	1	13462	1	0.50699	0.021364	0.078934	0.829087	1676	4	0.50699		BTD	9	0.097588	0.27389	0.991165	3738	3	0.13961	0.032074	0.13636	0.989756	1676	4	0.13961
	CPA3	5	0.74116	0.77925	1	13306	1	0.99296	0.021386	0.079004	0.829331	1677	3	0.99296		BCL2L2	6	0.92459	0.92523	0.999665	17518	1	0.50106	0.032081	0.11652	0.985559	1677	3	0.50106
	PRICKLE2	5	0.90111	0.90149	1	15615	0	0.82323	0.02141	0.079081	0.829434	1678	3	0.82323		CA4	3	0.9679	0.96806	0.999665	18345	0	2.5981	0.032104	0.080126	0.985559	1678	3	2.5981
	SLC9A3R1	5	0.84739	0.85036	1	14661	1	0.62869	0.021428	0.079144	0.829434	1679	4	0.62869		OR14A16	3	0.96786	0.96802	0.999665	18344	0	1.7716	0.032143	0.080208	0.985559	1679	3	1.7716
	UPB1	5	0.89046	0.89093	1	15433	0	0.42774	0.021432	0.079159	0.829434	1680	4	0.42774		REN	3	0.20174	0.31594	0.991358	6287	2	-0.64047	0.032145	0.080214	0.985559	1680	1	-0.64047
	PARVG	5	0.97856	0.97871	1	17225	0	0.56355	0.021442	0.079198	0.829434	1681	5	0.56355		APC	6	0.19247	0.38351	0.993744	6071	1	0.69109	0.032163	0.11675	0.985559	1681	5	0.69109
	SEMA3G	5	0.63215	0.72764	1	12329	1	0.80868	0.021543	0.079538	0.831377	1682	4	0.80868		ETV5	3	0.89421	0.89427	0.999665	16960	0	0.50309	0.032186	0.080309	0.985559	1682	3	0.50309
	CDCA2	5	0.8664	0.86718	1	14979	1	1.3943	0.02155	0.079556	0.831377	1683	4	1.3943		FMO1	6	0.8855	0.89615	0.999665	16793	1	0.76898	0.032215	0.11688	0.985559	1683	5	0.76898
	RNF43	5	0.97842	0.97857	1	17222	0	0.51962	0.021583	0.079667	0.831377	1684	5	0.51962		ELK3	3	0.085283	0.16616	0.983159	3372	1	0.2477	0.032228	0.080415	0.985559	1684	2	0.2477
	EGR2	5	0.53994	0.68219	1	11492	2	-0.053139	0.021598	0.079714	0.831377	1685	2	-0.053139		CTBP1	3	0.29527	0.43063	0.99446	8477	2	-0.22971	0.03227	0.080512	0.985559	1685	1	-0.22971
	ZNF441	5	0.59741	0.71385	1	12067	1	1.1998	0.021613	0.079767	0.831377	1686	3	1.1998		FXYD4	3	0.9677	0.96787	0.999665	18343	0	1.132	0.032303	0.080587	0.985559	1686	3	1.132
	BIRC2	4	0.85622	0.85566	1	14804	0	0.93757	0.021615	0.068502	0.812543	1687	2	0.93757		GULP1	3	0.96768	0.96786	0.999665	18342	0	1.523	0.032316	0.080615	0.985559	1687	3	1.523
	C2CD5	5	0.97837	0.97853	1	17220	0	0.42254	0.021628	0.079812	0.831377	1688	5	0.42254		NDUFV1	3	0.066514	0.14116	0.983159	2862	1	2.8967	0.032381	0.08076	0.985559	1688	2	2.8967
	DDX51	5	0.64774	0.73423	1	12450	1	0.90947	0.021636	0.079842	0.831377	1689	4	0.90947		MORN2	3	0.85384	0.85388	0.999665	16248	0	0.65426	0.032395	0.080791	0.985559	1689	2	0.65426
	CHP2	5	0.91708	0.91739	1	15938	0	0.50495	0.021638	0.079845	0.831377	1690	4	0.50495		RAB20	3	0.75363	0.75379	0.999665	14557	0	1.091	0.032437	0.080889	0.985559	1690	2	1.091
	ANKK1	5	0.97834	0.97849	1	17219	0	0.68761	0.021664	0.079929	0.831766	1691	5	0.68761		C14orf93	6	0.46085	0.65006	0.999665	10469	2	0.649	0.032479	0.1176	0.985559	1691	3	0.649
	GCC2	5	0.074482	0.18169	0.954495	3395	3	-0.42712	0.021742	0.080182	0.831868	1692	2	-0.42712		CERS3	6	0.15218	0.33451	0.991358	5115	2	1.5293	0.032479	0.11761	0.985559	1692	4	1.5293
	SNTB1	5	0.23143	0.41533	1	7165	1	0.82411	0.021777	0.080296	0.831868	1693	3	0.82411		OR12D2	3	0.96744	0.96761	0.999665	18338	0	1.4075	0.032564	0.081177	0.985559	1693	3	1.4075
	ELF4	5	0.34217	0.50842	1	8744	1	0.836	0.021779	0.0803	0.831868	1694	4	0.836		PDZD7	3	0.46571	0.53083	0.997083	10511	1	0.68142	0.032604	0.081261	0.985559	1694	2	0.68142
	TXLNA	5	0.9782	0.97837	1	17218	0	0.87115	0.021804	0.080378	0.831868	1695	5	0.87115		DTNB	9	0.85857	0.92902	0.999665	16317	1	1.2805	0.032617	0.13802	0.992613	1695	7	1.2805
	EPHX3	5	0.88931	0.88978	1	15415	0	0.69882	0.021808	0.080395	0.831868	1696	3	0.69882		MTERF4	3	0.64714	0.65757	0.999665	12851	1	1.9722	0.032652	0.08137	0.985559	1696	2	1.9722
	PCSK4	5	0.93846	0.93865	1	16348	0	0.78195	0.021813	0.08041	0.831868	1697	4	0.78195		CSH1	3	0.37582	0.47858	0.997083	9463	1	0.77347	0.032688	0.081457	0.985559	1697	2	0.77347
	BRINP2	5	0.97819	0.97835	1	17217	0	0.47334	0.021814	0.080418	0.831868	1698	5	0.47334		NCOA4	9	0.41644	0.67868	0.999665	9956	3	0.2967	0.032736	0.13839	0.993492	1698	5	0.2967
	FAM107A	6	0.79086	0.8365	1	13883	1	0.46987	0.021821	0.083319	0.832542	1699	4	0.46987		FHL5	3	0.93373	0.93388	0.999665	17693	0	1.5385	0.032772	0.081639	0.985559	1699	3	1.5385
	C19orf60	5	0.97817	0.97834	1	17216	0	0.77187	0.021827	0.080467	0.831868	1700	5	0.77187		DEPDC1B	3	0.5502	0.58564	0.999665	11522	1	2.2534	0.032793	0.081683	0.985559	1700	2	2.2534
	CAPN13	5	0.10994	0.23874	0.988959	4319	2	1.0454	0.021831	0.080479	0.831868	1701	3	1.0454		SERPINB3	3	0.9672	0.96738	0.999665	18333	0	1.081	0.032796	0.081689	0.985559	1701	3	1.081
	FTSJ2	5	0.97816	0.97833	1	17215	0	0.61585	0.021843	0.080526	0.831868	1702	5	0.61585		DCBLD2	3	0.9672	0.96738	0.999665	18331	0	1.8353	0.0328	0.081696	0.985559	1702	3	1.8353
	EEF2K	5	0.97815	0.97832	1	17214	0	0.48922	0.021848	0.080545	0.831868	1703	5	0.48922		GPR35	6	0.41023	0.61819	0.999665	9880	2	0.20437	0.032861	0.11867	0.985559	1703	3	0.20437
	SELM	5	0.52449	0.66814	1	11275	2	0.85598	0.021865	0.0806	0.831868	1704	3	0.85598		ANO1	3	0.22876	0.34931	0.991358	6927	1	-0.17389	0.032897	0.08191	0.985559	1704	1	-0.17389
	TAF3	5	0.97544	0.97563	1	17140	0	1.1769	0.021876	0.080632	0.831868	1705	5	1.1769		RPS19	3	0.58501	0.6101	0.999665	11968	1	1.2165	0.032939	0.082004	0.985559	1705	2	1.2165
	SNX22	5	0.96577	0.96598	1	16929	0	0.50688	0.02191	0.080735	0.831986	1706	4	0.50688		SARS2	3	0.96704	0.96723	0.999665	18329	0	1.7928	0.032958	0.082044	0.985559	1706	3	1.7928
	C14orf182	5	0.97806	0.97824	1	17213	0	0.40678	0.021941	0.080839	0.832116	1707	5	0.40678		MERTK	3	0.82878	0.82872	0.999665	15829	0	1.7764	0.032981	0.082092	0.985559	1707	2	1.7764
	SEMA6B	5	0.6663	0.74231	1	12599	1	0.81548	0.021941	0.08084	0.832116	1708	4	0.81548		KDM5C	3	0.96701	0.9672	0.999665	18328	0	1.4575	0.032993	0.082125	0.985559	1708	3	1.4575
	HORMAD2	4	0.97804	0.97811	1	17212	0	0.67725	0.021964	0.069479	0.814444	1709	4	0.67725		FPGS	6	0.97527	0.97523	0.999665	18478	0	1.1288	0.033002	0.11907	0.985559	1709	5	1.1288
	KLHDC3	5	0.97803	0.9782	1	17211	0	0.88156	0.021973	0.080952	0.832542	1710	5	0.88156		OR10P1	3	0.66782	0.67434	0.999665	13156	1	-0.28586	0.033022	0.082184	0.985559	1710	1	-0.28586
	RBM28	5	0.12657	0.26462	0.990693	4769	3	-0.48706	0.021984	0.080992	0.832542	1711	1	-0.48706		ZNF624	3	0.236	0.35826	0.992088	7099	1	2.0321	0.033066	0.082304	0.985559	1711	2	2.0321
	TSPAN6	5	0.96841	0.9686	1	16987	0	1.1085	0.022003	0.081053	0.832542	1712	4	1.1085		PLAT	3	0.96691	0.96711	0.999665	18323	0	2.0012	0.03309	0.082348	0.985559	1712	3	2.0012
	ANKRD34C	5	0.97799	0.97816	1	17210	0	0.44791	0.02201	0.081073	0.832542	1713	5	0.44791		IQCF6	3	0.89634	0.89645	0.999665	17007	0	2.9086	0.0331	0.082373	0.985559	1713	3	2.9086
	PTPN13	5	0.97794	0.97811	1	17209	0	0.52066	0.022063	0.081263	0.832542	1714	5	0.52066		PJA2	3	0.75813	0.75837	0.999665	14635	0	1.2227	0.033106	0.082379	0.985559	1714	2	1.2227
	KIAA0753	5	0.72347	0.7699	1	13117	1	1.2817	0.022105	0.081387	0.832542	1715	3	1.2817		ANKMY1	3	0.556	0.58961	0.999665	11603	1	2.7718	0.033116	0.082404	0.985559	1715	2	2.7718
	SALL1	5	0.97786	0.97803	1	17208	0	0.757	0.02214	0.081488	0.832542	1716	5	0.757		TRIM14	3	0.062304	0.1356	0.979332	2753	1	0.47693	0.033148	0.082476	0.985559	1716	2	0.47693
	TCP10	5	0.78166	0.80313	1	13766	1	0.70588	0.022148	0.081519	0.832542	1717	4	0.70588		ZNF614	3	0.96684	0.96703	0.999665	18322	0	1.5396	0.033165	0.08251	0.985559	1717	3	1.5396
	BACE1	5	0.19381	0.36543	1	6351	3	-0.19321	0.02215	0.081525	0.832542	1718	2	-0.19321		NEURL1B	3	0.29711	0.43288	0.995281	8513	1	2.5339	0.033174	0.082534	0.985559	1718	2	2.5339
	MAGEA9B	2	0.97785	0.97776	1	17207	0	1.0298	0.022151	0.041043	0.720884	1719	2	1.0298		TC2N	6	0.96081	0.96096	0.999665	18194	0	1.6278	0.033175	0.11956	0.985559	1719	5	1.6278
	TOX4	4	0.37922	0.52298	1	9268	1	1.0647	0.022175	0.070107	0.814444	1720	3	1.0647		CCDC33	6	0.26301	0.46637	0.997083	7744	2	1.6333	0.033207	0.11964	0.985559	1720	4	1.6333
	MNS1	5	0.20356	0.37954	1	6584	3	-0.21946	0.022189	0.08165	0.832542	1721	2	-0.21946		POLR3G	3	0.48145	0.54062	0.997083	10701	1	1.344	0.033273	0.082757	0.985559	1721	2	1.344
	PTPRG	5	0.97781	0.97798	1	17206	0	0.65588	0.022191	0.081661	0.832542	1722	5	0.65588		CCRL2	6	0.84329	0.87317	0.999665	16070	1	1.0769	0.033326	0.11996	0.985559	1722	4	1.0769
	NCAPH2	5	0.55255	0.69374	1	11679	1	1.1259	0.022205	0.081706	0.832542	1723	4	1.1259		SSR1	3	0.96665	0.96684	0.999665	18318	0	1.5079	0.033346	0.082904	0.985559	1723	3	1.5079
	TRHDE	5	0.97779	0.97796	1	17205	0	0.51858	0.022207	0.081709	0.832542	1724	5	0.51858		TRIML2	3	0.4127	0.4994	0.997083	9912	1	-0.039102	0.033357	0.082931	0.985559	1724	1	-0.039102
	FUT6	5	0.9541	0.95429	1	16653	0	0.91013	0.022213	0.081725	0.832542	1725	4	0.91013		C1QTNF9B-AS1	6	0.8979	0.9043	0.999665	17037	1	1.0541	0.033378	0.12011	0.985559	1725	5	1.0541
	PHF20L1	5	0.9273	0.92758	1	16141	0	0.9457	0.022218	0.081741	0.832542	1726	3	0.9457		AOC2	3	0.45751	0.52587	0.997083	10421	1	-0.076428	0.033398	0.08302	0.985559	1726	1	-0.076428
	RYR2	5	0.46377	0.61387	1	10466	2	0.71247	0.022237	0.081817	0.832542	1727	3	0.71247		DLG1	9	0.6897	0.85769	0.999665	13479	2	0.94744	0.033399	0.14051	0.993883	1727	7	0.94744
	SUV420H2	5	0.97776	0.97793	1	17204	0	0.5276	0.022239	0.081825	0.832542	1728	5	0.5276		SSSCA1	3	0.96654	0.96674	0.999665	18317	0	1.3547	0.033461	0.083174	0.985559	1728	3	1.3547
	ASIC2	5	0.97772	0.97789	1	17203	0	1.1248	0.022282	0.08196	0.832542	1729	5	1.1248		NUDT13	3	0.96652	0.96672	0.999665	18316	0	1.6249	0.033479	0.083216	0.985559	1729	3	1.6249
	BBS4	5	0.97772	0.97788	1	17202	0	0.51349	0.022285	0.081972	0.832542	1730	5	0.51349		TSGA10	6	0.25473	0.45682	0.996866	7550	2	0.8895	0.033492	0.12043	0.98656	1730	4	0.8895
	CPOX	5	0.9777	0.97787	1	17201	0	0.81483	0.022295	0.082001	0.832542	1731	5	0.81483		USP8	3	0.84029	0.84028	0.999665	16018	0	2.1694	0.033499	0.083257	0.985559	1731	2	2.1694
	TWIST2	5	0.9777	0.97787	1	17200	0	0.46446	0.022303	0.082031	0.832542	1732	5	0.46446		S100A6	3	0.96649	0.9667	0.999665	18314	0	1.0159	0.033505	0.083274	0.985559	1732	3	1.0159
	WBSCR28	5	0.97763	0.9778	1	17199	0	0.2047	0.022371	0.082243	0.832542	1733	5	0.2047		PFN3	3	0.91374	0.91381	0.999665	17324	0	2.4287	0.033549	0.083386	0.985559	1733	3	2.4287
	LRP4	5	0.51422	0.65887	1	11148	2	-0.23355	0.022371	0.082246	0.832542	1734	2	-0.23355		LOC101927322	3	0.72217	0.72288	0.999665	14017	1	2.0277	0.033574	0.08344	0.985559	1734	2	2.0277
	ITPKA	5	0.9592	0.95936	1	16768	0	0.66627	0.022412	0.082369	0.832542	1735	4	0.66627		ZDBF2	6	0.33755	0.55103	0.997083	9010	2	1.5405	0.033578	0.12067	0.986979	1735	4	1.5405
	TEX13B	5	0.018389	0.05918	0.788131	1328	2	0.098432	0.022426	0.082419	0.832542	1736	2	0.098432		METTL15	3	0.96641	0.96662	0.999665	18313	0	1.2859	0.033585	0.083464	0.985559	1736	3	1.2859
	MRPS5	5	0.88262	0.88308	1	15288	0	1.1935	0.02244	0.082464	0.832542	1737	4	1.1935		VKORC1	3	0.9664	0.96661	0.999665	18311	0	1.5213	0.033599	0.083498	0.985559	1737	3	1.5213
	FXYD2	4	0.97755	0.9776	1	17197	0	0.39833	0.022445	0.070883	0.814853	1738	4	0.39833		BZW2	3	0.87411	0.87422	0.999665	16579	0	0.67512	0.033649	0.083617	0.985559	1738	3	0.67512
	RNF182	5	0.97752	0.9777	1	17195	0	0.3718	0.022476	0.082599	0.832542	1739	5	0.3718		POLR1A	3	0.96635	0.96655	0.999665	18310	0	1.4964	0.033652	0.083624	0.985559	1739	3	1.4964
	AFF3	5	0.95466	0.95489	1	16669	0	0.86262	0.022491	0.082646	0.832542	1740	4	0.86262		STEAP1	3	0.93799	0.93819	0.999665	17776	0	1.713	0.033733	0.083799	0.985559	1740	3	1.713
	RBMS1	5	0.9775	0.97767	1	17194	0	0.47736	0.022497	0.082664	0.832542	1741	5	0.47736		RPL10L	3	0.92448	0.92454	0.999665	17513	0	2.1847	0.033733	0.083801	0.985559	1741	3	2.1847
	TMEM70	6	0.92089	0.9207	1	16017	0	0.64624	0.022505	0.085361	0.832891	1742	5	0.64624		MYOZ1	3	0.96626	0.96646	0.999665	18309	0	1.431	0.033737	0.083807	0.985559	1742	3	1.431
	KCTD18	5	0.94855	0.94877	1	16552	0	0.95289	0.022509	0.082705	0.832542	1743	4	0.95289		HMGA2	3	0.85013	0.85012	0.999665	16177	0	2.3365	0.03375	0.083833	0.985559	1743	2	2.3365
	KRT25	5	0.97748	0.97765	1	17193	0	0.35666	0.022519	0.082736	0.832542	1744	5	0.35666		GGN	3	0.56922	0.59884	0.999665	11777	1	0.51393	0.033774	0.083886	0.985559	1744	2	0.51393
	ZFP1	5	0.9617	0.96187	1	16837	0	0.38826	0.022537	0.082785	0.832542	1745	4	0.38826		VLDLR	3	0.84395	0.84397	0.999665	16079	0	2.5913	0.033775	0.083892	0.985559	1745	2	2.5913
	UBXN7	5	0.97743	0.97759	1	17192	0	0.49887	0.02257	0.082894	0.832542	1746	5	0.49887		AP5M1	3	0.10659	0.1941	0.985108	3985	2	-0.80625	0.033816	0.083986	0.985559	1746	1	-0.80625
	HPS4	5	0.85028	0.85279	1	14715	1	0.40326	0.022573	0.082904	0.832542	1747	3	0.40326		PRRG3	3	0.96617	0.96635	0.999665	18308	0	1.5686	0.033831	0.084022	0.985559	1747	3	1.5686
	LRGUK	5	0.90446	0.90483	1	15684	0	0.82761	0.02261	0.083027	0.832542	1748	4	0.82761		ZC4H2	6	0.38297	0.60121	0.999665	9557	3	1.3162	0.033852	0.12143	0.986979	1748	3	1.3162
	YWHAQ	5	0.6349	0.72882	1	12352	1	0.94649	0.022631	0.083105	0.832542	1749	4	0.94649		DGKH	9	0.42221	0.68435	0.999665	10015	4	0.5908	0.033852	0.14193	0.995156	1749	5	0.5908
	IST1	7	0.69372	0.81366	1	12836	1	0.53636	0.022643	0.09094	0.84609	1750	5	0.53636		SUCNR1	3	0.49607	0.54986	0.997083	10866	1	0.22265	0.033858	0.084084	0.985559	1750	1	0.22265
	S100A3	5	0.97733	0.9775	1	17191	0	0.35401	0.022665	0.083214	0.832542	1751	5	0.35401		RIN2	6	0.0027959	0.013388	0.962523	172	3	0.028539	0.033901	0.12157	0.986979	1751	3	0.028539
	ABHD16B	5	0.89744	0.89784	1	15549	0	0.72742	0.022665	0.083214	0.832542	1752	4	0.72742		NPTX2	3	0.96606	0.96624	0.999665	18307	0	2.1442	0.033938	0.084262	0.985559	1752	3	2.1442
	L1CAM	5	0.51381	0.6585	1	11142	1	0.74776	0.022686	0.083276	0.832542	1753	4	0.74776		FCRL4	3	0.61808	0.6348	0.999665	12412	1	-0.16857	0.033941	0.084269	0.985559	1753	1	-0.16857
	MORN2	5	0.76243	0.79142	1	13552	1	-0.20205	0.022702	0.083325	0.832542	1754	2	-0.20205		C10orf62	3	0.036575	0.090236	0.974719	1848	2	-1.1679	0.033983	0.084365	0.985559	1754	1	-1.1679
	PLA2G2A	5	0.16487	0.32301	1	5692	1	0.69281	0.022703	0.083328	0.832542	1755	4	0.69281		TRMT112	3	0.96601	0.96618	0.999665	18304	0	2.3484	0.033987	0.084374	0.985559	1755	3	2.3484
	PDE6G	5	0.9773	0.97746	1	17189	0	0.23366	0.022703	0.083329	0.832542	1756	5	0.23366		APBB1IP	3	0.96601	0.96617	0.999665	18303	0	1.305	0.033992	0.084387	0.985559	1756	3	1.305
	CCT6B	5	0.44708	0.5992	1	10236	1	0.0072795	0.022718	0.083374	0.832542	1757	2	0.0072795		SLC12A6	12	0.26629	0.56346	0.997083	7819	4	0.92231	0.034063	0.15696	0.999535	1757	8	0.92231
	ZNF778	5	0.97727	0.97744	1	17188	0	0.60718	0.022731	0.083417	0.832542	1758	5	0.60718		RGPD4	3	0.92589	0.92598	0.999665	17540	0	2.4621	0.034078	0.084579	0.985559	1758	3	2.4621
	RAB4B	5	0.16667	0.32567	1	5728	2	0.72648	0.022757	0.083506	0.832542	1759	3	0.72648		CYB561	9	0.93221	0.95814	0.999665	17668	1	1.175	0.034091	0.14264	0.995156	1759	6	1.175
	TTC39C	8	0.99531	0.99527	1	17722	0	0.31007	0.022766	0.099076	0.858897	1760	7	0.31007		RBM19	3	0.16195	0.26535	0.989799	5364	1	2.6902	0.03412	0.084663	0.985559	1760	2	2.6902
	TMA16	4	0.93482	0.93458	1	16284	0	1.7937	0.022791	0.071875	0.814865	1761	3	1.7937		PROZ	3	0.96581	0.96597	0.999665	18301	0	1.6642	0.034194	0.084848	0.985559	1761	3	1.6642
	EIF4E1B	5	0.23447	0.41791	1	7212	1	0.75341	0.022803	0.083661	0.832542	1762	4	0.75341		F3	3	0.96578	0.96595	0.999665	18299	0	1.0916	0.034217	0.084892	0.985559	1762	3	1.0916
	CLK3	5	0.97643	0.97661	1	17165	0	0.76629	0.02281	0.083688	0.832542	1763	5	0.76629		TMEM196	3	0.72444	0.72504	0.999665	14050	1	1.0647	0.034234	0.084923	0.985559	1763	2	1.0647
	ATP5D	5	0.4914	0.63838	1	10835	2	0.36404	0.022813	0.083702	0.832542	1764	3	0.36404		TMEM246	3	0.71544	0.7165	0.999665	13903	1	0.76342	0.034275	0.085016	0.985559	1764	2	0.76342
	PSMD7	5	0.40461	0.5623	1	9625	2	-0.15136	0.022815	0.083709	0.832542	1765	2	-0.15136		NLRP7	3	0.20887	0.3248	0.991358	6442	1	2.1067	0.034314	0.085095	0.985559	1765	2	2.1067
	TJP1	5	0.96255	0.96274	1	16853	0	0.84913	0.02282	0.083723	0.832542	1766	4	0.84913		WDR36	3	0.96562	0.96579	0.999665	18298	0	0.95173	0.034379	0.085258	0.985559	1766	3	0.95173
	ZNF563	4	0.9148	0.91458	1	15893	0	1.137	0.022833	0.071998	0.814865	1767	3	1.137		MUCL1	3	0.96559	0.96576	0.999665	18297	0	1.5	0.034411	0.085328	0.985559	1767	3	1.5
	DCHS2	12	0.54997	0.79427	1	11646	3	0.39163	0.022897	0.11223	0.878098	1768	7	0.39163		TMEM132A	3	0.11936	0.21067	0.988233	4309	1	2.0999	0.034424	0.085357	0.985559	1768	2	2.0999
	KLK7	5	0.94817	0.94838	1	16544	0	0.76797	0.022903	0.084019	0.832542	1769	4	0.76797		SEC14L1	12	0.038865	0.1548	0.983159	1952	3	0.83051	0.03443	0.15819	0.999535	1769	9	0.83051
	POGK	5	0.97709	0.97726	1	17184	0	0.50947	0.022911	0.084047	0.832542	1770	5	0.50947		RPL37	3	0.13991	0.23724	0.988921	4826	2	-0.88236	0.034442	0.085408	0.985559	1770	1	-0.88236
	C1orf234	5	0.55172	0.69298	1	11664	2	0.11255	0.022912	0.084048	0.832542	1771	2	0.11255		C10orf10	3	0.96549	0.96565	0.999665	18296	0	1.1903	0.034515	0.085578	0.985559	1771	3	1.1903
	FABP4	5	0.21729	0.39902	1	6903	2	0.054074	0.022923	0.084085	0.832542	1772	2	0.054074		KIAA0556	3	0.38976	0.48636	0.997083	9640	1	0.26914	0.034568	0.085694	0.985559	1772	2	0.26914
	DOPEY2	5	0.97706	0.97723	1	17183	0	0.40068	0.022936	0.084129	0.832542	1773	5	0.40068		FCGR2A	3	0.96539	0.96557	0.999665	18294	0	1.3787	0.034605	0.08577	0.985559	1773	3	1.3787
	LCE3B	5	0.96332	0.96352	1	16872	0	0.98686	0.022948	0.084174	0.832542	1774	4	0.98686		USP34	3	0.61121	0.62957	0.999665	12333	1	1.8606	0.034609	0.085779	0.985559	1774	2	1.8606
	CHRNA7	5	0.97704	0.9772	1	17182	0	0.42504	0.022963	0.084228	0.832542	1775	5	0.42504		BPGM	3	0.96537	0.96554	0.999665	18292	0	1.116	0.034633	0.085831	0.985559	1775	3	1.116
	MRPL28	5	0.97703	0.9772	1	17181	0	0.45801	0.022966	0.084239	0.832542	1776	5	0.45801		MOXD1	3	0.96534	0.96551	0.999665	18291	0	1.2463	0.03466	0.085888	0.985559	1776	3	1.2463
	PPARD	5	0.88502	0.88547	1	15335	0	0.8613	0.022968	0.084243	0.832542	1777	4	0.8613		AGR2	3	0.96534	0.96551	0.999665	18290	0	1.5708	0.034664	0.085897	0.985559	1777	3	1.5708
	DENND2A	5	0.97702	0.97718	1	17180	0	0.69631	0.022982	0.084292	0.832542	1778	5	0.69631		IFT20	3	0.96532	0.96549	0.999665	18289	0	2.1533	0.034678	0.085931	0.985559	1778	3	2.1533
	JDP2	5	0.97699	0.97715	1	17179	0	0.62696	0.02301	0.084375	0.832542	1779	5	0.62696		LRRC26	3	0.96531	0.96548	0.999665	18288	0	1.2742	0.034692	0.085962	0.985559	1779	3	1.2742
	PTPRF	5	0.89395	0.8944	1	15499	0	0.36459	0.023033	0.084469	0.832542	1780	3	0.36459		PFN2	3	0.9653	0.96548	0.999665	18287	0	1.3982	0.034701	0.085981	0.985559	1780	3	1.3982
	ITIH3	5	0.86502	0.86586	1	14956	1	0.84809	0.023048	0.084518	0.832542	1781	4	0.84809		FAM222B	6	0.0047807	0.020745	0.962523	274	2	0.72658	0.034738	0.12388	0.986979	1781	4	0.72658
	UBE2M	5	0.7437	0.78067	1	13334	1	0.61791	0.023073	0.084596	0.832542	1782	4	0.61791		TPK1	3	0.96524	0.96542	0.999665	18286	0	0.89448	0.034755	0.086099	0.985559	1782	3	0.89448
	PNPLA6	5	0.29879	0.47177	1	8093	2	-0.082254	0.023089	0.08465	0.832542	1783	2	-0.082254		URGCP-MRPS24	3	0.96522	0.96539	0.999665	18285	0	1.648	0.034783	0.086166	0.985559	1783	3	1.648
	AHSP	5	0.60217	0.71569	1	12101	1	1.0975	0.02309	0.084657	0.832542	1784	4	1.0975		ALOX5	3	0.42771	0.50818	0.997083	10075	1	0.24689	0.03486	0.086356	0.985559	1784	1	0.24689
	PCDHGA6	5	0.97689	0.97705	1	17176	0	0.66133	0.023112	0.084723	0.832542	1785	5	0.66133		TMEM161A	3	0.96512	0.96529	0.999665	18283	0	1.2389	0.034883	0.086412	0.985559	1785	3	1.2389
	SIKE1	5	0.3823	0.54288	1	9307	1	0.79264	0.023144	0.084815	0.832542	1786	3	0.79264		CNIH4	3	0.25059	0.37624	0.993744	7456	2	-0.27662	0.034901	0.086453	0.985559	1786	1	-0.27662
	PHLDB3	5	0.26234	0.44117	1	7578	2	0.74628	0.023149	0.084828	0.832542	1787	3	0.74628		MMP2	6	0.58833	0.73503	0.999665	12011	2	1.1215	0.034904	0.12435	0.986979	1787	4	1.1215
	TIMP3	5	0.97685	0.97701	1	17175	0	0.80613	0.02315	0.084831	0.832542	1788	5	0.80613		AURKC	6	0.68791	0.80773	0.999665	13452	1	1.5404	0.034926	0.12441	0.986979	1788	3	1.5404
	PPP1R14A	5	0.97684	0.977	1	17174	0	0.47497	0.023164	0.084874	0.832542	1789	5	0.47497		ZDHHC11	3	0.86622	0.86625	0.999665	16461	0	0.31303	0.034943	0.086555	0.985559	1789	2	0.31303
	ASXL1	5	0.92728	0.92757	1	16139	0	0.70836	0.023174	0.084907	0.832542	1790	4	0.70836		KLRK1	3	0.96505	0.96523	0.999665	18281	0	1.1325	0.034947	0.086563	0.985559	1790	3	1.1325
	ALDH18A1	5	0.97682	0.97699	1	17173	0	0.5446	0.023178	0.084919	0.832542	1791	5	0.5446		PDCL3	3	0.94872	0.94891	0.999665	17972	0	1.5461	0.034985	0.086641	0.985559	1791	3	1.5461
	KRTAP22-1	2	0.97682	0.9767	1	17172	0	1.2853	0.023183	0.042902	0.732096	1792	2	1.2853		ISM2	3	0.33028	0.4538	0.996866	8924	1	2.5938	0.034992	0.086663	0.985559	1792	2	2.5938
	AXIN1	5	0.97681	0.97698	1	17171	0	0.55419	0.023189	0.08495	0.832542	1793	5	0.55419		GABBR2	3	0.91569	0.91572	0.999665	17353	0	2.3631	0.035001	0.086679	0.985559	1793	3	2.3631
	LOC729020	5	0.95808	0.95826	1	16738	0	1.1406	0.023199	0.08498	0.832542	1794	4	1.1406		TRIM29	3	0.96499	0.96516	0.999665	18278	0	1.4468	0.035011	0.086695	0.985559	1794	3	1.4468
	SDK2	5	0.9768	0.97696	1	17170	0	0.33636	0.023203	0.084994	0.832542	1795	5	0.33636		WDPCP	3	0.96498	0.96515	0.999665	18277	0	1.137	0.03502	0.086714	0.985559	1795	3	1.137
	TIGD6	5	0.76558	0.79324	1	13587	1	0.98747	0.023205	0.084998	0.832542	1796	4	0.98747		ZNF586	3	0.36195	0.47099	0.997083	9286	1	-0.15824	0.035027	0.086731	0.985559	1796	1	-0.15824
	RFX4	4	0.8753	0.87479	1	15142	0	0.87728	0.023211	0.073105	0.81845	1797	3	0.87728		ULBP3	3	0.96493	0.9651	0.999665	18275	0	1.208	0.035075	0.086854	0.985559	1797	3	1.208
	MXI1	7	0.45788	0.67187	1	10376	2	0.45665	0.02322	0.092897	0.851874	1798	4	0.45665		CDYL2	3	0.96492	0.96509	0.999665	18274	0	3.8865	0.035079	0.086866	0.985559	1798	3	3.8865
	PCDHGC5	5	0.97677	0.97693	1	17169	0	0.71654	0.023225	0.085075	0.832735	1799	5	0.71654		TCEAL7	3	0.64545	0.65623	0.999665	12824	1	0.24443	0.03511	0.086941	0.985559	1799	1	0.24443
	OLAH	5	0.49346	0.64021	1	10861	1	1.1208	0.023235	0.08511	0.832735	1800	3	1.1208		FRMD6	9	0.34122	0.60317	0.999665	9042	4	0.12476	0.035139	0.14592	0.995958	1800	4	0.12476
	UBE4A	5	0.20801	0.38594	1	6687	1	0.7	0.023254	0.085172	0.832766	1801	3	0.7		LYST	3	0.96486	0.96503	0.999665	18273	0	1.9052	0.035143	0.087023	0.985559	1801	3	1.9052
	SLC22A18AS	5	0.85249	0.85465	1	14752	1	0.19472	0.023311	0.085348	0.832891	1802	3	0.19472		NOX4	6	0.96127	0.96139	0.999665	18200	0	1.0251	0.035165	0.12506	0.986979	1802	5	1.0251
	LCE3A	5	0.82818	0.83516	1	14374	1	0.7226	0.023336	0.085431	0.832891	1803	4	0.7226		DHH	3	0.80765	0.80756	0.999665	15481	0	0.27527	0.035193	0.087146	0.985559	1803	2	0.27527
	MKNK2	5	0.97664	0.97681	1	17166	0	0.62253	0.023358	0.085499	0.832891	1804	5	0.62253		LEMD3	3	0.64547	0.65625	0.999665	12825	1	1.9879	0.035197	0.087154	0.985559	1804	2	1.9879
	TOMM40	5	0.31847	0.48826	1	8388	2	-0.27676	0.023364	0.085517	0.832891	1805	1	-0.27676		HTRA2	3	0.9648	0.96498	0.999665	18272	0	1.2409	0.035203	0.087169	0.985559	1805	3	1.2409
	TELO2	5	0.83194	0.83805	1	14435	1	1.2938	0.023372	0.085542	0.832891	1806	3	1.2938		CCNK	2	0.96475	0.96469	0.999665	18270	0	2.0838	0.035248	0.064007	0.985559	1806	2	2.0838
	TLL2	5	0.61434	0.72048	1	12190	1	0.58231	0.023394	0.085608	0.833077	1807	4	0.58231		CAMSAP2	3	0.87773	0.8778	0.999665	16647	0	1.7846	0.035342	0.087478	0.985559	1807	3	1.7846
	PEX1	4	0.88884	0.88837	1	15404	0	1.102	0.023396	0.07365	0.820499	1808	3	1.102		TRAM1L1	3	0.25488	0.38157	0.993744	7559	1	0.063437	0.03536	0.087522	0.985559	1808	1	0.063437
	TUBB2A	3	0.56947	0.58974	1	11879	1	0.86906	0.023452	0.059948	0.791241	1809	2	0.86906		CASC10	3	0.85808	0.85806	0.999665	16310	0	0.93025	0.035402	0.087612	0.985559	1809	2	0.93025
	SLC7A10	5	0.12938	0.26897	0.990693	4848	1	0.76336	0.023467	0.085836	0.834852	1810	4	0.76336		ZNF45	3	0.63302	0.64637	0.999665	12633	1	2.0596	0.035454	0.087721	0.985559	1810	2	2.0596
	CD96	5	0.91374	0.91406	1	15876	0	0.38089	0.023507	0.085973	0.835315	1811	3	0.38089		KLF8	5	0.52391	0.67044	0.999665	11234	2	0.92125	0.035459	0.12275	0.986979	1811	3	0.92125
	SPOPL	5	0.84303	0.84678	1	14595	1	0.88577	0.023529	0.086045	0.835315	1812	4	0.88577		TMEM255B	3	0.96453	0.96472	0.999665	18266	0	1.668	0.03547	0.08776	0.985559	1812	3	1.668
	C11orf63	5	0.82162	0.83029	1	14282	1	0.95962	0.023531	0.086048	0.835315	1813	4	0.95962		NUPL1	3	0.96452	0.9647	0.999665	18265	0	1.042	0.035479	0.087783	0.985559	1813	3	1.042
	COL21A1	5	0.8823	0.88275	1	15278	0	0.97452	0.023539	0.08607	0.835315	1814	4	0.97452		KDM4C	6	0.15166	0.33387	0.991358	5104	3	0.010944	0.035484	0.12596	0.986979	1814	3	0.010944
	TRIT1	4	0.7934	0.79376	1	13909	1	1.1418	0.023561	0.074117	0.821209	1815	3	1.1418		FAM134B	6	0.36069	0.57669	0.999665	9274	3	0.97333	0.035608	0.12632	0.986979	1815	3	0.97333
	HPCAL1	5	0.62223	0.72359	1	12266	1	0.88865	0.023566	0.086165	0.835677	1816	4	0.88865		PRKCQ	3	0.63665	0.64927	0.999665	12689	1	2.1718	0.035608	0.088082	0.985559	1816	2	2.1718
	WBP2NL	4	0.97642	0.97643	1	17164	0	0.54291	0.023577	0.074161	0.821209	1817	4	0.54291		ADCY10	3	0.18327	0.29262	0.991358	5850	1	0.21303	0.035611	0.08809	0.985559	1817	2	0.21303
	BEX1	5	0.54212	0.68416	1	11531	1	0.56077	0.023585	0.08623	0.835677	1818	3	0.56077		UNG	6	0.10479	0.25731	0.989799	3946	2	0.48615	0.035644	0.12641	0.986979	1818	4	0.48615
	NDUFB8	4	0.95777	0.95766	1	16731	0	0.88916	0.023615	0.074278	0.821209	1819	4	0.88916		SHOX	3	0.96435	0.96455	0.999665	18263	0	1.0596	0.03565	0.088179	0.985559	1819	3	1.0596
	THG1L	5	0.16921	0.3295	1	5789	3	-0.75303	0.023695	0.086572	0.83793	1820	2	-0.75303		RRM1	3	0.9643	0.9645	0.999665	18262	0	1.1808	0.035697	0.088275	0.985559	1820	3	1.1808
	PEA15	5	0.97479	0.97497	1	17126	0	0.40069	0.023772	0.086822	0.839304	1821	5	0.40069		HOXC11	3	0.96428	0.96449	0.999665	18261	0	1.1339	0.035715	0.088319	0.985559	1821	3	1.1339
	KIF26A	5	0.90261	0.90296	1	15653	0	1.0467	0.023785	0.086859	0.839304	1822	4	1.0467		KRT4	3	0.95822	0.95847	0.999665	18151	0	2.1136	0.035728	0.088346	0.985559	1822	3	2.1136
	ATOH1	5	0.075407	0.18327	0.954653	3419	2	0.22523	0.023792	0.086889	0.839304	1823	3	0.22523		SYCE3	3	0.82499	0.82496	0.999665	15765	0	0.85641	0.035777	0.088443	0.985559	1823	2	0.85641
	ADCY6	5	0.97618	0.97636	1	17161	0	1.009	0.023824	0.086985	0.839304	1824	5	1.009		MTRNR2L6	3	0.00074757	0.0021595	0.774664	56	1	2.2894	0.035806	0.088504	0.985559	1824	2	2.2894
	CALCA	7	0.96495	0.96489	1	16904	0	0.92308	0.023834	0.094921	0.854206	1825	4	0.92308		ATP8B3	5	0.24628	0.43979	0.995347	7354	2	-0.05057	0.03583	0.12363	0.986979	1825	2	-0.05057
	IFT74	5	0.97616	0.97635	1	17160	0	0.83731	0.023841	0.087037	0.839304	1826	5	0.83731		DIAPH3	6	0.50651	0.67955	0.999665	10998	1	1.3519	0.035856	0.127	0.987554	1826	3	1.3519
	MDK	9	0.3421	0.60032	1	8742	1	0.55806	0.023849	0.10536	0.869325	1827	6	0.55806		TNIP2	6	0.72352	0.82799	0.999665	14040	1	1.6691	0.035862	0.12702	0.987554	1827	5	1.6691
	MRPL9	5	0.68816	0.75247	1	12789	1	0.94005	0.023861	0.087102	0.839304	1828	4	0.94005		CECR1	9	0.0041294	0.02174	0.962523	248	3	1.5285	0.035862	0.14812	0.997831	1828	6	1.5285
	FOXQ1	5	0.8283	0.83525	1	14377	1	0.42461	0.023891	0.087199	0.839304	1829	3	0.42461		MTTP	3	0.60604	0.62574	0.999665	12259	1	2.575	0.035918	0.088778	0.985559	1829	2	2.575
	PVRL3	5	0.83441	0.83998	1	14468	1	0.96758	0.023898	0.08722	0.839304	1830	4	0.96758		CHRM2	10	0.96671	0.97653	0.999665	18319	1	0.726	0.035941	0.15316	0.999535	1830	6	0.726
	TNFRSF10B	5	0.96992	0.97006	1	17022	0	0.53805	0.023906	0.087243	0.839304	1831	4	0.53805		C16orf62	3	0.52735	0.57023	0.998727	11264	1	1.4713	0.035944	0.088839	0.985559	1831	2	1.4713
	WISP1	17	0.74699	0.92832	1	13363	5	0.19418	0.023909	0.1301	0.904137	1832	9	0.19418		SKA2	3	0.96405	0.96424	0.999665	18257	0	1.9165	0.035952	0.088858	0.985559	1832	3	1.9165
	NDUFAF7	5	0.97609	0.97628	1	17158	0	0.50461	0.023915	0.087271	0.839304	1833	5	0.50461		RIT1	6	0.56753	0.72058	0.999665	11755	1	1.4048	0.035969	0.1273	0.987652	1833	5	1.4048
	UBTF	5	0.22415	0.40877	1	7063	3	-0.39083	0.023916	0.087277	0.839304	1834	2	-0.39083		IL24	3	0.96402	0.96422	0.999665	18256	0	0.8227	0.035975	0.088917	0.985559	1834	3	0.8227
	N4BP3	5	0.97606	0.97625	1	17157	0	0.40803	0.023938	0.087344	0.839304	1835	5	0.40803		C9orf3	6	0.88582	0.89635	0.999665	16799	1	1.0518	0.035993	0.12736	0.987652	1835	5	1.0518
	CDNF	5	0.28115	0.45696	1	7849	1	1.1259	0.023945	0.087366	0.839304	1836	4	1.1259		DBNDD1	9	0.60145	0.80002	0.999665	12183	3	0.79481	0.036008	0.14858	0.997831	1836	6	0.79481
	DGKQ	5	0.52125	0.66521	1	11235	1	0.78825	0.02401	0.087568	0.839952	1837	3	0.78825		RPL7	3	0.96399	0.96419	0.999665	18255	0	1.5448	0.036008	0.088992	0.985559	1837	3	1.5448
	NRD1	5	0.22016	0.40303	1	6961	2	0.4864	0.024019	0.087595	0.839952	1838	3	0.4864		ATP1B2	3	0.18282	0.29205	0.991358	5836	1	-0.13045	0.036069	0.089127	0.985559	1838	1	-0.13045
	SULT1C3	5	0.66375	0.7412	1	12575	1	0.74579	0.024021	0.0876	0.839952	1839	4	0.74579		LOC113230	3	0.85173	0.85173	0.999665	16210	0	0.69872	0.036111	0.089216	0.985559	1839	2	0.69872
	P4HA3	5	0.15115	0.30239	1	5367	3	-0.32269	0.024026	0.08762	0.839952	1840	2	-0.32269		PAH	3	0.96386	0.96406	0.999665	18254	0	1.2412	0.036143	0.089287	0.985559	1840	3	1.2412
	PURA	5	0.97593	0.97613	1	17156	0	0.68862	0.024071	0.087774	0.840402	1841	5	0.68862		IL23A	3	0.47358	0.53577	0.997083	10609	1	1.8597	0.036151	0.089304	0.985559	1841	2	1.8597
	HSFX1	3	0.97593	0.97613	1	17155	0	0.52289	0.024075	0.061439	0.795933	1842	3	0.52289		FCHO2	3	0.065098	0.13927	0.983159	2826	2	-1.0928	0.036153	0.08931	0.985559	1842	1	-1.0928
	SUSD3	5	0.032487	0.096711	0.86368	1971	2	0.52139	0.024082	0.087807	0.840402	1843	3	0.52139		MAP3K4	3	0.79525	0.7953	0.999665	15257	0	1.2554	0.036194	0.089404	0.985559	1843	2	1.2554
	RNF26	5	0.97587	0.97606	1	17154	0	0.66245	0.024126	0.08794	0.840857	1844	5	0.66245		PEF1	3	0.3897	0.48632	0.997083	9639	1	2.3072	0.03622	0.089472	0.985559	1844	2	2.3072
	TCF23	5	0.97586	0.97605	1	17152	0	0.29452	0.02414	0.087984	0.840857	1845	5	0.29452		DSCR4	3	0.96377	0.96398	0.999665	18253	0	1.8219	0.036232	0.089489	0.985559	1845	3	1.8219
	DNASE1L3	5	0.90147	0.90182	1	15621	0	0.62251	0.024148	0.088023	0.840857	1846	4	0.62251		CEND1	3	0.78774	0.78784	0.999665	15138	0	0.23422	0.036236	0.089496	0.985559	1846	1	0.23422
	DTX2	5	0.97585	0.97604	1	17151	0	0.54987	0.024154	0.088042	0.840857	1847	5	0.54987		EPYC	3	0.96374	0.96396	0.999665	18252	0	1.2807	0.036255	0.089539	0.985559	1847	3	1.2807
	TAS2R43	4	0.97583	0.97582	1	17150	0	0.93119	0.024173	0.075876	0.825488	1848	4	0.93119		ZNF853	3	0.9637	0.96391	0.999665	18251	0	1.1935	0.036297	0.089634	0.985559	1848	3	1.1935
	BCL9L	4	0.97427	0.97421	1	17109	0	0.78997	0.024186	0.075911	0.825488	1849	4	0.78997		SERINC4	3	0.9637	0.96391	0.999665	18250	0	1.1012	0.036302	0.089645	0.985559	1849	3	1.1012
	SCN9A	5	0.97578	0.97597	1	17148	0	0.43399	0.024217	0.088252	0.841534	1850	5	0.43399		PAPPA2	3	0.64912	0.65913	0.999665	12882	1	2.0073	0.036332	0.089713	0.985559	1850	2	2.0073
	ZNF728	3	0.97576	0.97598	1	17147	0	0.98138	0.024236	0.061811	0.795933	1851	3	0.98138		MTRNR2L2	3	0.9636	0.96381	0.999665	18246	0	1.4578	0.036401	0.08986	0.985559	1851	3	1.4578
	SPNS3	5	0.97575	0.97594	1	17146	0	0.39821	0.024246	0.088335	0.841534	1852	5	0.39821		GATS	3	0.24305	0.36693	0.992996	7278	2	-1.0251	0.036403	0.089867	0.985559	1852	1	-1.0251
	HSP90AB1	5	0.55181	0.69307	1	11667	2	-0.22955	0.024247	0.08834	0.841534	1853	1	-0.22955		OC90	3	0.96354	0.96377	0.999665	18245	0	1.3319	0.036457	0.089983	0.985559	1853	3	1.3319
	MAGIX	5	0.97575	0.97594	1	17145	0	0.36285	0.024249	0.088346	0.841534	1854	5	0.36285		IREB2	3	0.17108	0.27702	0.991165	5578	2	-0.77925	0.036486	0.090042	0.985559	1854	1	-0.77925
	DCTPP1	5	0.97571	0.9759	1	17144	0	0.4081	0.024286	0.088467	0.841707	1855	5	0.4081		CRABP2	6	0.10222	0.2524	0.989799	3880	1	1.0972	0.036495	0.12866	0.989192	1855	5	1.0972
	RHOB	5	0.1544	0.3074	1	5446	1	0.61059	0.024303	0.088521	0.841707	1856	4	0.61059		PIGT	3	0.96349	0.96371	0.999665	18244	0	1.6192	0.036509	0.090092	0.985559	1856	3	1.6192
	TMCC3	5	0.071807	0.17731	0.950461	3329	1	0.66101	0.024343	0.088643	0.841707	1857	4	0.66101		TEX10	6	0.46099	0.65016	0.999665	10472	2	1.1398	0.036515	0.12872	0.989192	1857	4	1.1398
	PRR9	5	0.97565	0.97584	1	17143	0	0.71527	0.024349	0.088655	0.841707	1858	5	0.71527		DCP1A	3	0.50352	0.55465	0.997083	10957	1	2.6125	0.036523	0.090126	0.985559	1858	2	2.6125
	C12orf23	5	0.65548	0.73756	1	12502	1	0.37754	0.024357	0.088677	0.841707	1859	3	0.37754		GLYAT	3	0.14232	0.24029	0.988921	4894	1	2.1601	0.036541	0.090155	0.985559	1859	2	2.1601
	BSG	9	0.48844	0.71527	1	10799	2	0.32307	0.02438	0.10715	0.873167	1860	5	0.32307		SLC4A8	9	0.2884	0.54741	0.997083	8313	3	0.63002	0.036552	0.15023	0.999154	1860	5	0.63002
	NDUFV3	8	0.46026	0.67965	1	10408	2	0.65326	0.024424	0.10522	0.869325	1861	5	0.65326		VIP	3	0.092872	0.17614	0.983159	3600	2	-1.1042	0.03657	0.090228	0.985559	1861	1	-1.1042
	MRPS2	5	0.49428	0.64096	1	10877	1	1.4141	0.024451	0.088978	0.843066	1862	4	1.4141		CES4A	6	0.90221	0.90739	0.999665	17107	1	1.0581	0.036587	0.1289	0.989192	1862	5	1.0581
	TTC24	5	0.97554	0.97573	1	17142	0	0.65067	0.024459	0.088997	0.843066	1863	5	0.65067		BTLA	3	0.24802	0.37305	0.993421	7391	2	-0.31396	0.036611	0.090314	0.985559	1863	1	-0.31396
	NT5C1A	5	0.14714	0.29623	1	5261	3	-0.29227	0.024467	0.089022	0.843066	1864	2	-0.29227		XKR8	3	0.71868	0.71956	0.999665	13959	1	2.1686	0.036653	0.090404	0.985559	1864	2	2.1686
	KLHL40	5	0.12232	0.25793	0.990693	4658	1	0.041585	0.024567	0.089348	0.845155	1865	2	0.041585		UBE2N	3	0.96334	0.96357	0.999665	18242	0	1.0534	0.036659	0.090426	0.985559	1865	3	1.0534
	CYP4F11	4	0.89441	0.89403	1	15504	0	1.2688	0.024569	0.076973	0.827159	1866	3	1.2688		APEX2	3	0.96333	0.96356	0.999665	18241	0	1.1095	0.036673	0.090455	0.985559	1866	3	1.1095
	ZFAND2A	5	0.31082	0.48178	1	8283	2	0.86086	0.024603	0.089475	0.845155	1867	3	0.86086		WDR62	3	0.87305	0.87317	0.999665	16568	0	0.82821	0.036695	0.090513	0.985559	1867	3	0.82821
	P2RX7	5	0.27221	0.44943	1	7720	1	0.93646	0.024604	0.089478	0.845155	1868	4	0.93646		SULT1C3	3	0.96328	0.96351	0.999665	18240	0	1.102	0.036716	0.090558	0.985559	1868	3	1.102
	PEAK1	5	0.97154	0.97169	1	17052	0	0.74455	0.024636	0.089572	0.8456	1869	4	0.74455		SQSTM1	9	0.59895	0.79841	0.999665	12139	2	0.5572	0.036718	0.15072	0.999154	1869	4	0.5572
	KMT2C	5	0.95365	0.95385	1	16646	0	1.2135	0.02468	0.089713	0.845786	1870	4	1.2135		SLC5A6	3	0.96328	0.9635	0.999665	18239	0	1.7409	0.036721	0.09057	0.985559	1870	3	1.7409
	PLEKHG4	5	0.63326	0.72812	1	12338	1	0.76685	0.024687	0.089731	0.845786	1871	4	0.76685		ASPRV1	3	0.14532	0.24417	0.989799	4958	1	2.2513	0.036776	0.090698	0.985559	1871	2	2.2513
	CPNE7	5	0.35049	0.51552	1	8853	2	0.18013	0.024688	0.089732	0.845786	1872	2	0.18013		PDZRN3	3	0.78897	0.78905	0.999665	15158	0	1.7812	0.036778	0.090704	0.985559	1872	2	1.7812
	UGT1A7	2	0.27982	0.31664	1	7821	1	-0.48224	0.02473	0.04567	0.74665	1873	1	-0.48224		ZNF574	3	0.96322	0.96344	0.999665	18238	0	1.7526	0.036782	0.090713	0.985559	1873	3	1.7526
	USP16	5	0.67675	0.74707	1	12687	1	0.47151	0.024743	0.089912	0.84609	1874	3	0.47151		LRRC72	3	0.85762	0.8576	0.999665	16303	0	2.1567	0.036793	0.090743	0.985559	1874	2	2.1567
	INS	4	0.82328	0.82272	1	14309	0	1.0097	0.024769	0.077556	0.827199	1875	3	1.0097		SPHAR	3	0.9632	0.96342	0.999665	18237	0	1.8916	0.036801	0.090759	0.985559	1875	3	1.8916
	OMA1	5	0.19168	0.36235	1	6296	2	0.91618	0.024798	0.090091	0.84609	1876	3	0.91618		RNASE1	6	0.74441	0.83451	0.999665	14408	1	1.5987	0.036815	0.12954	0.989485	1876	5	1.5987
	CCDC177	5	0.8768	0.87726	1	15177	1	0.10583	0.024798	0.090092	0.84609	1877	2	0.10583		TP53BP2	3	0.94261	0.94276	0.999665	17860	0	2.4045	0.036819	0.090806	0.985559	1877	3	2.4045
	ZADH2	5	0.97518	0.97536	1	17139	0	0.37317	0.024816	0.090151	0.84609	1878	5	0.37317		C1orf167	3	0.96314	0.96336	0.999665	18236	0	1.3663	0.036858	0.090905	0.985559	1878	3	1.3663
	NOD2	5	0.97517	0.97535	1	17138	0	0.2125	0.024831	0.090188	0.84609	1879	5	0.2125		OR6C75	3	0.44474	0.51816	0.997083	10263	1	2.4468	0.036871	0.090937	0.985559	1879	2	2.4468
	ADCY1	5	0.88634	0.88681	1	15356	0	0.993	0.024838	0.090203	0.84609	1880	4	0.993		DNTTIP2	3	0.16267	0.26634	0.989799	5381	1	2.1109	0.03688	0.090955	0.985559	1880	2	2.1109
	SLC34A3	5	0.92975	0.93002	1	16181	0	0.75421	0.024841	0.090214	0.84609	1881	4	0.75421		CELA1	3	0.95094	0.95119	0.999665	18022	0	1.9868	0.036889	0.090977	0.985559	1881	3	1.9868
	HIST1H3J	4	0.97515	0.97512	1	17137	0	0.99877	0.024847	0.077775	0.827762	1882	4	0.99877		CD4	3	0.9631	0.96332	0.999665	18235	0	1.3845	0.036896	0.090988	0.985559	1882	3	1.3845
	TMEM219	5	0.8873	0.8878	1	15375	0	0.90826	0.024848	0.090237	0.84609	1883	4	0.90826		RARRES3	3	0.70513	0.70706	0.999665	13727	1	1.8186	0.036903	0.091002	0.985559	1883	2	1.8186
	RPS6KL1	5	0.96018	0.96034	1	16790	0	0.91455	0.024898	0.090421	0.84609	1884	4	0.91455		MUS81	3	0.1994	0.31295	0.991358	6244	1	2.1122	0.036924	0.091044	0.985559	1884	2	2.1122
	NME5	4	0.9751	0.97507	1	17136	0	0.71219	0.024901	0.07795	0.827762	1885	4	0.71219		CNEP1R1	3	0.96307	0.96328	0.999665	18234	0	1.5003	0.036933	0.091064	0.985559	1885	3	1.5003
	TOX3	5	0.91526	0.91552	1	15901	0	0.53485	0.024918	0.090478	0.84609	1886	4	0.53485		PCDHGB6	3	0.32316	0.45013	0.996744	8858	1	2.2914	0.036945	0.091085	0.985559	1886	2	2.2914
	SYNE1	5	0.24634	0.42786	1	7382	1	0.83725	0.024928	0.090507	0.84609	1887	3	0.83725		ZBED2	3	0.94435	0.94451	0.999665	17889	0	1.8151	0.036985	0.091175	0.985559	1887	3	1.8151
	RBM6	5	0.91402	0.91434	1	15883	0	0.84214	0.024943	0.09055	0.84609	1888	4	0.84214		CHAMP1	3	0.79679	0.7968	0.999665	15289	0	2.4248	0.037011	0.09123	0.985559	1888	2	2.4248
	CD200R1	7	0.12237	0.29021	1	4660	4	-0.84134	0.024957	0.098775	0.858897	1889	3	-0.84134		USP48	3	0.077571	0.15596	0.983159	3154	1	2.1197	0.037028	0.091264	0.985559	1889	2	2.1197
	TRIML1	5	0.97503	0.97521	1	17134	0	0.45555	0.024971	0.09064	0.84609	1890	5	0.45555		REEP4	3	0.96297	0.96319	0.999665	18232	0	1.1167	0.037033	0.091275	0.985559	1890	3	1.1167
	SCGB1A1	5	0.010274	0.036194	0.71792	904	4	-0.69074	0.025018	0.090791	0.84609	1891	1	-0.69074		PELO	3	0.76311	0.76337	0.999665	14714	0	2.0064	0.037064	0.09135	0.985559	1891	2	2.0064
	TMEM251	7	0.93229	0.93381	1	16228	1	0.36044	0.025021	0.098974	0.858897	1892	4	0.36044		GABRP	3	0.22288	0.34198	0.991358	6779	2	-0.4847	0.03707	0.091365	0.985559	1892	1	-0.4847
	TRIM72	5	0.97496	0.97513	1	17131	0	0.4119	0.025045	0.090869	0.84609	1893	5	0.4119		FAM109A	3	0.82826	0.82818	0.999665	15822	0	1.6969	0.037072	0.091372	0.985559	1893	2	1.6969
	PMVK	5	0.97495	0.97512	1	17130	0	0.66605	0.025054	0.090892	0.84609	1894	5	0.66605		SLC39A11	3	0.60351	0.62387	0.999665	12215	1	-0.31898	0.037111	0.091455	0.985559	1894	1	-0.31898
	AGRN	5	0.65385	0.73685	1	12488	1	0.30959	0.025074	0.090952	0.84609	1895	4	0.30959		QRICH2	3	0.96289	0.9631	0.999665	18231	0	0.92272	0.037114	0.091462	0.985559	1895	3	0.92272
	EFHC1	5	0.9749	0.97508	1	17129	0	0.70344	0.025095	0.091009	0.84609	1896	5	0.70344		IGFN1	3	0.16873	0.27404	0.991165	5522	1	2.1312	0.037151	0.091542	0.985559	1896	2	2.1312
	MCF2L2	5	0.75693	0.78814	1	13474	1	0.77395	0.025103	0.091034	0.84609	1897	3	0.77395		RIC8A	3	0.91177	0.91185	0.999665	17283	0	1.7272	0.037153	0.091551	0.985559	1897	3	1.7272
	FAM179A	5	0.61955	0.72253	1	12235	1	0.62931	0.025129	0.091122	0.846476	1898	3	0.62931		KRTAP9-3	3	0.96283	0.96305	0.999665	18230	0	1.2254	0.037166	0.091581	0.985559	1898	3	1.2254
	ZC3H11A	5	0.30724	0.47881	1	8235	2	0.27603	0.025184	0.091285	0.84709	1899	2	0.27603		OPA1	3	0.92935	0.92946	0.999665	17610	0	2.197	0.037221	0.091713	0.985559	1899	3	2.197
	ZNF205	5	0.84127	0.84538	1	14568	1	0.69531	0.025214	0.091374	0.84709	1900	4	0.69531		CCDC73	3	0.96276	0.96298	0.999665	18229	0	1.3685	0.037238	0.091747	0.985559	1900	3	1.3685
	GLTSCR2	5	0.97478	0.97496	1	17125	0	0.85177	0.025219	0.09139	0.84709	1901	5	0.85177		DMRT2	6	0.20787	0.40194	0.994188	6419	1	1.2167	0.037238	0.13066	0.989756	1901	5	1.2167
	BEND7	5	0.21951	0.40216	1	6946	1	0.664	0.025249	0.091481	0.84709	1902	4	0.664		AP3S2	3	0.96272	0.96294	0.999665	18228	0	1.1829	0.03728	0.091849	0.985559	1902	3	1.1829
	NLRC4	5	0.97475	0.97492	1	17124	0	0.36485	0.025252	0.091488	0.84709	1903	5	0.36485		OSTF1	3	0.43784	0.51408	0.997083	10186	1	2.706	0.0373	0.091893	0.985559	1903	2	2.706
	ZSCAN5A	5	0.97474	0.97491	1	17123	0	1.0676	0.025261	0.091517	0.84709	1904	5	1.0676		FASTKD3	3	0.35595	0.46764	0.997083	9218	1	2.0784	0.037318	0.091919	0.985559	1904	2	2.0784
	SLC5A2	5	0.95058	0.95076	1	16587	0	0.68712	0.025323	0.091729	0.847788	1905	4	0.68712		POLN	3	0.80087	0.80085	0.999665	15349	0	1.669	0.03732	0.091926	0.985559	1905	2	1.669
	UQCC2	5	0.97467	0.97485	1	17122	0	1.0112	0.025326	0.091734	0.847788	1906	5	1.0112		SPINT1	6	0.15723	0.34072	0.991358	5227	1	1.0926	0.037335	0.13091	0.989756	1906	5	1.0926
	COPS7B	6	0.93366	0.9335	1	16262	0	0.78809	0.025359	0.09376	0.852466	1907	4	0.78809		SLC22A18AS	3	0.93213	0.93223	0.999665	17664	0	0.7716	0.037361	0.092028	0.985559	1907	3	0.7716
	ADH5	3	0.24203	0.3645	1	7328	1	1.5415	0.025361	0.064498	0.803011	1908	2	1.5415		SERINC5	3	0.96263	0.96286	0.999665	18227	0	2.0695	0.037366	0.092038	0.985559	1908	3	2.0695
	JUNB	5	0.97458	0.97475	1	17119	0	0.45897	0.025415	0.092044	0.850218	1909	5	0.45897		EIF4E3	15	0.8124	0.94623	0.999665	15564	4	0.6132	0.037373	0.17994	0.99972	1909	11	0.6132
	SAMD13	5	0.67918	0.7482	1	12705	1	0.72318	0.025461	0.092172	0.850495	1910	4	0.72318		SMARCAD1	9	0.65889	0.83746	0.999665	13020	2	1.3104	0.03742	0.15284	0.999535	1910	6	1.3104
	FGF4	5	0.767	0.7941	1	13603	1	0.22658	0.025514	0.092326	0.850495	1911	4	0.22658		TAF6	7	0.95671	0.95663	0.999665	18129	1	1.067	0.037444	0.13953	0.993883	1911	6	1.067
	PPIL4	5	0.419	0.57468	1	9853	2	0.30908	0.025515	0.092331	0.850495	1912	3	0.30908		CELF5	3	0.94288	0.94307	0.999665	17864	0	2.1887	0.037476	0.092279	0.985559	1912	3	2.1887
	SOX9	5	0.78803	0.80718	1	13843	1	0.78372	0.025516	0.092335	0.850495	1913	4	0.78372		ZNF286B	3	0.96252	0.96274	0.999665	18226	0	1.5933	0.037476	0.092282	0.985559	1913	3	1.5933
	ANAPC2	5	0.095088	0.2151	0.971089	3949	2	0.72286	0.025526	0.092358	0.850495	1914	3	0.72286		CCDC38	3	0.0099016	0.026526	0.962523	546	1	2.6386	0.037484	0.092297	0.985559	1914	2	2.6386
	CERKL	4	0.92041	0.92018	1	16006	0	0.82055	0.025547	0.079744	0.831377	1915	3	0.82055		FOXP4	3	0.94059	0.94072	0.999665	17829	0	1.1969	0.037486	0.092303	0.985559	1915	3	1.1969
	GTF2E2	3	0.32195	0.42984	1	8444	1	0.6838	0.025668	0.065204	0.803724	1916	2	0.6838		TTLL2	3	0.9625	0.96273	0.999665	18224	0	1.0247	0.037495	0.092331	0.985559	1916	3	1.0247
	WFIKKN2	5	0.62495	0.72469	1	12283	1	0.72743	0.025681	0.092738	0.851874	1917	4	0.72743		TXNDC17	3	0.96248	0.9627	0.999665	18223	0	1.3703	0.037519	0.092391	0.985559	1917	3	1.3703
	HNRNPR	5	0.8794	0.87987	1	15219	0	1.0186	0.025684	0.092744	0.851874	1918	3	1.0186		OR1Q1	3	0.61813	0.63483	0.999665	12414	1	1.7323	0.037528	0.092414	0.985559	1918	2	1.7323
	TAF13	4	0.9729	0.97285	1	17079	0	1.8411	0.025695	0.080137	0.831868	1919	4	1.8411		TRIML1	3	0.2468	0.37152	0.992996	7369	2	-0.33036	0.03757	0.092505	0.985559	1919	1	-0.33036
	CELA2A	5	0.69616	0.75622	1	12861	1	0.49239	0.025707	0.092808	0.851874	1920	4	0.49239		TRPC3	6	0.056403	0.1597	0.983159	2592	4	-0.73991	0.037638	0.13174	0.989756	1920	2	-0.73991
	PRMT2	5	0.89188	0.89232	1	15458	0	0.49824	0.025726	0.092857	0.851874	1921	4	0.49824		PLAUR	3	0.81894	0.8189	0.999665	15666	0	0.8398	0.037653	0.092686	0.985559	1921	2	0.8398
	RDH13	5	0.02777	0.084417	0.848458	1765	2	-0.17059	0.025735	0.092879	0.851874	1922	2	-0.17059		FAM32A	3	0.96232	0.96254	0.999665	18220	0	1.4029	0.037678	0.092756	0.985559	1922	3	1.4029
	ABHD17A	3	0.97425	0.97444	1	17108	0	0.74037	0.025746	0.065393	0.803741	1923	3	0.74037		C2orf61	3	0.456	0.52497	0.997083	10405	1	2.0454	0.037687	0.09277	0.985559	1923	2	2.0454
	UNC50	5	0.78902	0.80783	1	13854	1	0.11017	0.02579	0.09299	0.851874	1924	2	0.11017		ZC3H13	3	0.96225	0.96247	0.999665	18219	0	1.0286	0.03775	0.09291	0.985559	1924	3	1.0286
	ZNF251	5	0.058126	0.15469	0.936563	2920	2	-0.12225	0.025845	0.093107	0.851874	1925	2	-0.12225		PNMAL1	3	0.96221	0.96242	0.999665	18218	0	1.5097	0.037788	0.092997	0.985559	1925	3	1.5097
	GAS2L1	5	0.37089	0.533	1	9148	1	0.55223	0.025853	0.093127	0.851874	1926	4	0.55223		GTPBP8	3	0.61757	0.63441	0.999665	12406	1	0.30419	0.037819	0.093069	0.985559	1926	2	0.30419
	SPATA33	5	0.77486	0.7989	1	13699	1	1.0997	0.025862	0.093153	0.851874	1927	4	1.0997		EAF1	3	0.84551	0.84556	0.999665	16113	0	0.81271	0.037861	0.093166	0.985559	1927	2	0.81271
	CLDN4	5	0.96134	0.96151	1	16830	0	0.56289	0.025891	0.093214	0.851874	1928	4	0.56289		C12orf29	3	0.94704	0.94724	0.999665	17935	0	2.5474	0.037863	0.093169	0.985559	1928	3	2.5474
	L1TD1	4	0.91204	0.91185	1	15838	0	1.6487	0.025896	0.080703	0.831986	1929	3	1.6487		ADH1A	3	0.70471	0.70669	0.999665	13719	1	2.002	0.037898	0.093252	0.985559	1929	2	2.002
	RETNLB	5	0.72773	0.77207	1	13159	1	0.93833	0.025899	0.093234	0.851874	1930	4	0.93833		METTL10	3	0.89138	0.89144	0.999665	16905	0	1.5015	0.037903	0.093264	0.985559	1930	3	1.5015
	DHX35	5	0.95014	0.95032	1	16578	0	0.22501	0.0259	0.093235	0.851874	1931	4	0.22501		KITLG	3	0.96203	0.96224	0.999665	18216	0	1.4865	0.037967	0.093393	0.985559	1931	3	1.4865
	EFNA1	5	0.52789	0.67124	1	11323	1	0.85335	0.02594	0.093346	0.851894	1932	4	0.85335		IMPDH2	3	0.96202	0.96223	0.999665	18215	0	1.0565	0.037976	0.093422	0.985559	1932	3	1.0565
	GOLGA7	5	0.50979	0.6549	1	11083	1	0.94943	0.025955	0.093381	0.851894	1933	4	0.94943		DUSP18	3	0.40633	0.49571	0.997083	9836	1	2.6891	0.037978	0.093425	0.985559	1933	2	2.6891
	NR6A1	5	0.22076	0.40391	1	6978	3	-0.21844	0.025965	0.093409	0.851894	1934	2	-0.21844		GALNTL6	3	0.83643	0.8364	0.999665	15951	0	2.2198	0.038013	0.093502	0.985559	1934	2	2.2198
	PPP1R26	5	0.83455	0.84008	1	14470	1	0.38158	0.02601	0.093519	0.852023	1935	3	0.38158		CASC5	3	0.96198	0.96219	0.999665	18214	0	1.5343	0.038024	0.093523	0.985559	1935	3	1.5343
	ASB8	5	0.41343	0.56991	1	9772	2	-0.24268	0.026047	0.093615	0.852023	1936	2	-0.24268		HBZ	3	0.7381	0.73832	0.999665	14292	1	1.9878	0.03804	0.093562	0.985559	1936	2	1.9878
	LRP8	5	0.96343	0.96362	1	16875	0	0.64784	0.026061	0.09365	0.852023	1937	4	0.64784		CNTN6	3	0.96192	0.96213	0.999665	18212	0	1.3084	0.038083	0.093667	0.985559	1937	3	1.3084
	SPINK2	8	0.76284	0.8657	1	13557	1	0.52587	0.026129	0.11144	0.878098	1938	6	0.52587		ACSM6	3	0.96189	0.9621	0.999665	18211	0	1.0749	0.038107	0.093717	0.985559	1938	3	1.0749
	LRRC3B	5	0.080514	0.19155	0.960301	3554	2	0.98145	0.026143	0.093849	0.852466	1939	3	0.98145		GCM2	3	0.021739	0.055835	0.962523	1169	1	2.0258	0.038128	0.093759	0.985559	1939	2	2.0258
	MT3	2	0.97384	0.97379	1	17098	0	1.0552	0.02616	0.04818	0.756706	1940	2	1.0552		CDK2AP2	6	0.13732	0.31626	0.991358	4780	2	0.82015	0.038135	0.13309	0.989756	1940	3	0.82015
	SMR3A	5	0.32411	0.49302	1	8477	2	0.99162	0.02616	0.093897	0.852466	1941	3	0.99162		SH3BGRL3	3	0.92001	0.92004	0.999665	17419	0	1.0633	0.038153	0.093821	0.985559	1941	3	1.0633
	EEF1D	11	0.70736	0.87158	1	12961	2	0.54592	0.026188	0.12306	0.895014	1942	8	0.54592		PSMC3IP	6	0.57106	0.723	0.999665	11800	2	1.2231	0.038164	0.13317	0.989756	1942	4	1.2231
	MTO1	5	0.9084	0.90876	1	15756	0	0.78899	0.026201	0.094001	0.852466	1943	4	0.78899		OR10W1	3	0.96183	0.96204	0.999665	18210	0	1.8326	0.038174	0.093869	0.985559	1943	3	1.8326
	CTSS	5	0.87759	0.87808	1	15192	1	0.34084	0.02623	0.09408	0.852466	1944	3	0.34084		PCDH1	9	0.92422	0.95599	0.999665	17503	1	0.25604	0.038185	0.15514	0.999535	1944	5	0.25604
	TAF5	5	0.97254	0.97267	1	17070	0	1.0742	0.026239	0.094097	0.852466	1945	4	1.0742		C5orf58	3	0.9618	0.96202	0.999665	18209	0	0.98586	0.038199	0.093917	0.985559	1945	3	0.98586
	SOGA1	5	0.40772	0.56501	1	9678	1	0.56867	0.026247	0.094117	0.852466	1946	4	0.56867		PRDM7	3	0.71124	0.71262	0.999665	13826	1	2.3815	0.038208	0.093936	0.985559	1946	2	2.3815
	ZNF10	5	0.75524	0.78719	1	13457	1	0.17134	0.026263	0.094149	0.852466	1947	3	0.17134		TSPY4	4	0.73966	0.75566	0.999665	14326	1	1.5334	0.038209	0.11407	0.985559	1947	2	1.5334
	SPRN	5	0.024417	0.075444	0.832625	1611	2	0.66844	0.026285	0.094208	0.852466	1948	3	0.66844		EPPIN-WFDC6	3	0.96171	0.96193	0.999665	18208	0	1.2257	0.038291	0.094124	0.985559	1948	3	1.2257
	EIF3C	3	0.97367	0.97383	1	17092	0	0.61854	0.026333	0.066754	0.808733	1949	3	0.61854		SLC35B4	3	0.9617	0.96192	0.999665	18207	0	2.0818	0.038296	0.094139	0.985559	1949	3	2.0818
	TMEM170A	5	0.20063	0.37535	1	6514	2	0.096487	0.02634	0.094355	0.852466	1950	2	0.096487		C1QL3	3	0.96166	0.96188	0.999665	18206	0	1.0466	0.038339	0.094247	0.985559	1950	3	1.0466
	EID1	5	0.82889	0.8357	1	14388	1	0.86334	0.026344	0.094361	0.852466	1951	3	0.86334		IL31RA	6	0.9731	0.97309	0.999665	18438	0	0.86873	0.038368	0.13368	0.989756	1951	5	0.86873
	MTUS2	10	0.59983	0.80176	1	12087	3	0.64566	0.026357	0.11783	0.886103	1952	7	0.64566		PITX2	6	0.032994	0.1082	0.974719	1701	3	0.37735	0.038383	0.13372	0.989756	1952	3	0.37735
	ACSF3	5	0.74884	0.78361	1	13382	1	0.42019	0.026403	0.094518	0.853036	1953	4	0.42019		LYN	3	0.78081	0.78088	0.999665	15013	0	2.3166	0.038386	0.094345	0.985559	1953	2	2.3166
	PAQR7	5	0.84744	0.8504	1	14662	1	0.75848	0.026407	0.094529	0.853036	1954	3	0.75848		ATF1	3	0.9616	0.96183	0.999665	18205	0	1.5927	0.038403	0.09438	0.985559	1954	3	1.5927
	CDH24	5	0.11255	0.24288	0.990359	4393	1	0.50398	0.026449	0.094632	0.853536	1955	4	0.50398		COL4A3BP	6	0.96744	0.96761	0.999665	18339	0	1.3679	0.038412	0.1338	0.989756	1955	5	1.3679
	YWHAB	5	0.76401	0.79234	1	13567	1	0.69701	0.026469	0.094683	0.853565	1956	4	0.69701		FCGR2B	3	0.091546	0.17436	0.983159	3558	2	-1.1791	0.038444	0.094472	0.985559	1956	1	-1.1791
	METTL21C	5	0.8102	0.82207	1	14114	1	0.12535	0.026505	0.094776	0.85398	1957	1	0.12535		OR5K4	3	0.29094	0.42536	0.994188	8373	1	1.1075	0.038486	0.094569	0.985559	1957	2	1.1075
	IRF2BP1	5	0.66339	0.74106	1	12571	1	0.97716	0.026595	0.094999	0.854206	1958	4	0.97716		DRICH1	3	0.9615	0.96175	0.999665	18204	0	1.0769	0.0385	0.094605	0.985559	1958	3	1.0769
	ZBTB16	5	0.95937	0.95953	1	16771	0	0.7827	0.026604	0.095027	0.854206	1959	4	0.7827		PPP1R7	6	0.89376	0.90151	0.999665	16950	1	0.90957	0.038512	0.13406	0.989756	1959	5	0.90957
	C2orf50	4	0.59278	0.65251	1	12034	1	0.92166	0.02664	0.082732	0.832542	1960	3	0.92166		SNX3	3	0.48993	0.54592	0.997083	10802	1	1.817	0.038528	0.094667	0.985559	1960	2	1.817
	LRRC26	5	0.9174	0.9177	1	15943	0	0.54264	0.026667	0.095185	0.855099	1961	4	0.54264		P4HA2	6	0.13377	0.31149	0.991358	4686	1	1.2934	0.038529	0.1341	0.989756	1961	5	1.2934
	BTBD17	5	0.20697	0.38445	1	6669	3	-0.17248	0.026697	0.095265	0.855328	1962	2	-0.17248		CLPTM1	9	0.77489	0.89132	0.999665	14908	2	1.0966	0.03853	0.15622	0.999535	1962	7	1.0966
	RHOT2	5	0.97166	0.9718	1	17054	0	0.7471	0.026711	0.095306	0.855328	1963	4	0.7471		KDM1B	3	0.96146	0.96171	0.999665	18203	0	1.9523	0.038539	0.094683	0.985559	1963	3	1.9523
	SLC25A38	5	0.80013	0.81509	1	13989	1	0.34228	0.02678	0.095477	0.856099	1964	3	0.34228		CIR1	3	0.30455	0.44037	0.995347	8657	1	2.9198	0.038564	0.094743	0.985559	1964	2	2.9198
	PPAP2C	5	0.27738	0.45378	1	7783	1	0.94759	0.026799	0.095517	0.856099	1965	4	0.94759		API5	3	0.55605	0.58964	0.999665	11604	1	2.1772	0.038569	0.094754	0.985559	1965	2	2.1772
	NR2C1	5	0.14923	0.2994	1	5317	1	0.58983	0.026832	0.095605	0.856099	1966	4	0.58983		FGF23	3	0.95352	0.95383	0.999665	18070	0	1.9452	0.038572	0.094762	0.985559	1966	3	1.9452
	SMIM10	5	0.78146	0.803	1	13764	1	0.91814	0.026853	0.095652	0.856099	1967	3	0.91814		LAG3	3	0.73866	0.73886	0.999665	14306	1	0.47102	0.03861	0.094838	0.985559	1967	2	0.47102
	TAF12	5	0.65735	0.73837	1	12521	1	1.2565	0.026941	0.09587	0.857067	1968	4	1.2565		LARP4	3	0.90384	0.90387	0.999665	17139	0	0.89093	0.038652	0.094938	0.985559	1968	3	0.89093
	AEN	5	0.25054	0.43133	1	7426	2	-0.015751	0.026947	0.09588	0.857067	1969	2	-0.015751		CLDN20	3	0.96133	0.96159	0.999665	18201	0	1.3981	0.038671	0.094991	0.985559	1969	3	1.3981
	UNG	5	0.02678	0.081802	0.842517	1725	2	0.20525	0.026999	0.096013	0.857159	1970	3	0.20525		MYOD1	3	0.72843	0.72888	0.999665	14127	1	1.5422	0.038694	0.095046	0.985559	1970	2	1.5422
	NLRP13	4	0.65767	0.69085	1	12523	1	0.80054	0.027025	0.08379	0.832542	1971	3	0.80054		CST9L	3	0.08912	0.17113	0.983159	3483	2	-0.85624	0.038735	0.095135	0.985559	1971	1	-0.85624
	RFC2	5	0.51003	0.65511	1	11088	2	1.3625	0.027031	0.0961	0.857159	1972	3	1.3625		ATP2C2	6	0.96494	0.96513	0.999665	18276	0	1.9356	0.038745	0.13467	0.989756	1972	5	1.9356
	C1orf198	7	0.12283	0.29103	1	4676	1	0.022993	0.027034	0.10571	0.869325	1973	2	0.022993		ADPRM	3	0.87953	0.8796	0.999665	16684	0	0.28579	0.038777	0.095228	0.985559	1973	3	0.28579
	HIST1H3D	5	0.8721	0.87261	1	15090	1	0.44722	0.027055	0.09616	0.857159	1974	4	0.44722		FAM45A	3	0.96121	0.96147	0.999665	18199	0	1.5656	0.038793	0.095264	0.985559	1974	3	1.5656
	TMEM221	5	0.071436	0.17668	0.950186	3318	3	-0.71348	0.027061	0.096179	0.857159	1975	2	-0.71348		PLAC8L1	3	0.24825	0.37333	0.993421	7396	1	0.43085	0.038819	0.09532	0.985559	1975	2	0.43085
	APOL1	4	0.40644	0.55167	1	9654	1	0.95017	0.027064	0.083895	0.832542	1976	3	0.95017		CMKLR1	6	0.56961	0.722	0.999665	11783	1	0.53007	0.03882	0.13488	0.989756	1976	4	0.53007
	KCNK7	5	0.053227	0.14636	0.927485	2784	3	-0.58184	0.027082	0.096221	0.857159	1977	2	-0.58184		DCAF8L2	3	0.81196	0.81188	0.999665	15557	0	2.5917	0.038831	0.095342	0.985559	1977	2	2.5917
	MYO1D	5	0.96253	0.96271	1	16852	0	1.0106	0.02711	0.096291	0.857159	1978	4	1.0106		UNC13B	3	0.14767	0.24716	0.989799	5011	1	2.7284	0.038858	0.095403	0.985559	1978	2	2.7284
	TNFRSF1A	5	0.83426	0.83986	1	14466	1	1.1526	0.027182	0.096468	0.857159	1979	4	1.1526		CENPBD1	3	0.64799	0.65824	0.999665	12867	1	2.809	0.038867	0.095424	0.985559	1979	2	2.809
	KRTCAP2	5	0.88277	0.88323	1	15293	0	1.0889	0.027219	0.096564	0.857159	1980	3	1.0889		CITED4	3	0.14505	0.24382	0.989799	4948	2	-0.24908	0.038902	0.095505	0.985559	1980	1	-0.24908
	USH1G	5	0.42936	0.58375	1	9985	2	0.89265	0.02722	0.096565	0.857159	1981	3	0.89265		HRH1	12	0.53423	0.79308	0.999665	11340	4	0.47067	0.038933	0.17325	0.99972	1981	6	0.47067
	MRVI1	5	0.037571	0.10979	0.882069	2197	3	-0.46895	0.027275	0.096702	0.857159	1982	2	-0.46895		MCTP2	6	0.62365	0.76018	0.999665	12490	2	1.2912	0.038943	0.13521	0.989756	1982	4	1.2912
	TMOD3	5	0.40193	0.55994	1	9590	1	0.68059	0.02728	0.096711	0.857159	1983	4	0.68059		SERPINB7	9	0.74417	0.87942	0.999665	14402	2	0.82755	0.038946	0.15749	0.999535	1983	7	0.82755
	AKR1B1	5	0.046696	0.13248	0.914359	2564	1	0.94994	0.027281	0.096712	0.857159	1984	4	0.94994		LONP1	8	0.879	0.92936	0.999665	16670	1	1.2383	0.038952	0.1559	0.999535	1984	6	1.2383
	ITGAL	5	0.96758	0.96778	1	16967	0	0.62317	0.027302	0.096748	0.857159	1985	4	0.62317		NKX2-5	3	0.96104	0.96131	0.999665	18197	0	1.1275	0.03896	0.095641	0.985559	1985	3	1.1275
	GON4L	5	0.36622	0.52891	1	9083	1	1.5474	0.027381	0.096941	0.857881	1986	4	1.5474		SSX2IP	6	0.21452	0.40978	0.994188	6578	3	-0.25257	0.038969	0.13528	0.989756	1986	3	-0.25257
	PRR25	5	0.8931	0.89355	1	15478	0	0.58932	0.027397	0.096975	0.857881	1987	4	0.58932		SNCAIP	3	0.05184	0.12141	0.974719	2446	2	-3.3379	0.038985	0.0957	0.985559	1987	1	-3.3379
	CFHR2	4	0.76822	0.77147	1	13615	1	0.34172	0.027399	0.084839	0.832542	1988	2	0.34172		LIMD1	3	0.39939	0.49176	0.997083	9751	1	0.3714	0.039027	0.0958	0.985559	1988	2	0.3714
	RGN	5	0.49798	0.64424	1	10919	1	0.70641	0.027444	0.097087	0.857881	1989	4	0.70641		NME6	3	0.91343	0.91352	0.999665	17316	0	2.3674	0.039046	0.095846	0.985559	1989	3	2.3674
	NDUFS5	5	0.80079	0.81554	1	13994	1	1.1732	0.027452	0.097107	0.857881	1990	4	1.1732		POLL	3	0.96095	0.96122	0.999665	18196	0	2.3195	0.039048	0.095852	0.985559	1990	3	2.3195
	NEU1	5	0.95012	0.95029	1	16577	0	0.51629	0.027456	0.097115	0.857881	1991	4	0.51629		ODF1	3	0.27425	0.4051	0.994188	7977	2	-0.30674	0.039068	0.095905	0.985559	1991	1	-0.30674
	CYP4A11	3	0.97253	0.97272	1	17069	0	0.77504	0.027472	0.069447	0.814444	1992	3	0.77504		GALR1	3	0.85244	0.85244	0.999665	16223	0	0.94051	0.03911	0.095992	0.985559	1992	2	0.94051
	FAM46D	5	0.4571	0.60812	1	10370	2	0.63278	0.02748	0.097173	0.85797	1993	3	0.63278		CLUAP1	6	0.38826	0.6046	0.999665	9623	1	0.78647	0.039127	0.1357	0.989756	1993	4	0.78647
[truncated: 16,972 more rows]

## Sheet: Supp Data 3
	Supplementary Data 3. Genes ranked for enrichment: MAGeCK analysis of osimertinib vs control PC-9 cells following transduction with a genome-wide CRISPRn or CRISPRa library.
	Cells were transduced with either a genome-wide loss-of-function CRISPR/Cas9 library (targeting 18,010 human genes) or in parallel a genome-wide gain-of-function (activation) CRISPR/dCas9 SAM library targeting 23,430 coding isoforms with a unique transcription start site.
	After selection, library transduced cells were treated with osimertinib (100nM) twice per week over 21 days to select for resistance genes using the MAGeCK software package.
	Genes from both screens are ranked for enrichment (resistance) in the tables below.
	A description of the table headers is found at: https://sourceforge.net/p/mageck/wiki/Home/#gene_summary_txt
	CRISPR/Cas9 knockout library - PC-9/osimertinib															CRISPR/dCas9 SAM activation library - PC-9/osimertinib
	Gene	num	neg|score	neg|p-value	neg|fdr	neg|rank	neg|goodsgrna	neg|lfc	pos|score	pos|p-value	pos|fdr	pos|rank	pos|goodsgrna	pos|lfc		Gene	num	neg|score	neg|p-value	neg|fdr	neg|rank	neg|goodsgrna	neg|lfc	pos|score	pos|p-value	pos|fdr	pos|rank	pos|goodsgrna	pos|lfc
	NF2	10	1	1	1	18001	0	6.4583	4.1883e-30	2.7501e-07	0.000215	1	10	6.4583		WWTR1	7	0.54158	0.73493	0.999258	11409	2	4.96	1.9125e-06	1.2792e-05	0.107261	1	5	4.96
	KCTD5	5	1	1	1	17999	0	9.9193	1.3996e-20	2.7501e-07	0.000215	2	5	9.9193		NTRK1	6	0.77633	0.84522	0.999258	14906	1	3.7004	2.4395e-06	1.6969e-05	0.107261	2	5	3.7004
	NF1	5	1	1	1	18000	0	11.024	2.3086e-20	2.7501e-07	0.000215	3	5	11.024		MET	3	1	1	0.999996	18963	0	6.9303	3.5446e-06	1.0181e-05	0.107261	3	3	6.9303
	CSK	5	1	1	1	17998	0	7.2738	3.88e-16	2.7501e-07	0.000215	4	5	7.2738		FGF1	18	0.14547	0.42991	0.994925	4887	3	1.8971	5.4133e-06	8.119e-05	0.384901	4	14	1.8971
	CIC	5	1	1	1	17997	0	6.6094	1.0981e-15	2.7501e-07	0.000215	5	5	6.6094		FOSL1	3	0.59158	0.61492	0.999258	12051	1	6.4372	5.7006e-05	0.00017569	0.484006	5	2	6.4372
	RASA1	5	1	1	1	17996	0	5.0472	5.4775e-13	2.7501e-07	0.000215	6	5	5.0472		MRPS24	3	0.99994	0.99994	0.999996	18962	0	4.0605	6.0188e-05	0.00018875	0.484006	6	3	4.0605
	PAWR	5	1	1	1	17995	0	4.4052	3.0342e-12	2.7501e-07	0.000215	7	5	4.4052		PBRM1	3	0.99898	0.999	0.999996	18942	0	6.2366	8.2352e-05	0.00025088	0.484006	7	3	6.2366
	KIAA0907	5	1	1	1	17994	0	4.8139	2.758e-11	2.7501e-07	0.000215	8	5	4.8139		TXK	3	0.99992	0.99991	0.999996	18961	0	4.7531	8.2829e-05	0.00025192	0.484006	8	3	4.7531
	PTEN	4	1	1	1	17993	0	5.9365	6.1267e-11	2.7501e-07	0.000215	9	4	5.9365		FGF13	12	0.52881	0.78973	0.999258	11250	4	0.84319	8.5455e-05	0.00082991	0.729538	9	7	0.84319
	MED12	5	1	1	1	17992	0	4.9145	1.742e-10	2.7501e-07	0.000215	10	5	4.9145		KRAS	3	0.9879	0.98807	0.999825	18723	0	6.9641	8.5505e-05	0.00025714	0.484006	10	3	6.9641
	DPH2	5	0.99888	0.99889	1	17873	0	4.9576	1.525e-09	2.7501e-07	0.000215	11	5	4.9576		CYBA	3	0.036903	0.091011	0.969031	1857	1	6.1297	9.3407e-05	0.00028012	0.484006	11	2	6.1297
	ROCK2	5	0.99564	0.99564	1	17737	0	4.4075	1.6087e-09	2.7501e-07	0.000215	12	5	4.4075		FOSB	3	0.9999	0.99989	0.999996	18960	0	5.9311	0.00010492	0.00032659	0.484006	12	3	5.9311
	ETV3	9	1	1	1	17974	0	2.5722	4.0456e-09	2.7501e-07	0.000215	13	9	2.5722		ATF3	9	0.93849	0.95996	0.999258	17818	1	2.6747	0.00010547	0.00078866	0.729538	13	7	2.6747
	AJUBA	10	0.99992	0.99992	1	17942	0	2.5366	5.0592e-09	2.7501e-07	0.000215	14	10	2.5366		CD6	3	0.99989	0.99989	0.999996	18959	0	3.0443	0.0001055	0.00032868	0.484006	14	3	3.0443
	SUPT20H	5	1	1	1	17991	0	4.976	7.9584e-09	2.7501e-07	0.000215	15	5	4.976		ANAPC16	3	0.99183	0.99195	0.999825	18796	0	2.1461	0.00010682	0.00033181	0.484006	15	3	2.1461
	DET1	5	1	1	1	17990	0	3.128	1.0009e-08	2.7501e-07	0.000215	16	5	3.128		RGPD5	8	0.9848	0.9848	0.999825	18666	0	2.1962	0.00012107	0.00084975	0.729538	16	7	2.1962
	DPH1	5	1	1	1	17971	0	4.1257	4.452e-08	2.7501e-07	0.000215	17	5	4.1257		CSF1R	6	0.48517	0.66555	0.999258	10763	1	2.4167	0.00012818	0.00069729	0.729538	17	5	2.4167
	CARM1	5	1	1	1	17989	0	4.8871	4.7003e-08	2.7501e-07	0.000215	18	5	4.8871		GCFC2	6	0.96358	0.96378	0.999258	18293	0	2.4752	0.00013842	0.00075055	0.729538	18	5	2.4752
	THAP11	5	1	1	1	17988	0	2.6974	6.384e-08	2.7501e-07	0.000215	19	5	2.6974		PDGFRB	3	0.81826	0.81819	0.999258	15643	0	7.3209	0.00014954	0.00045921	0.621994	19	2	7.3209
	TAF5L	5	1	0.99999	1	17969	0	3.7229	7.0932e-08	2.7501e-07	0.000215	20	5	3.7229		TSEN2	6	0.99981	0.9998	0.999996	18958	0	2.6084	0.00018733	0.0010236	0.729538	20	6	2.6084
	MED24	5	1	1	1	17987	0	3.0095	1.0191e-07	2.7501e-07	0.000215	21	5	3.0095		ME3	9	0.35235	0.61456	0.999258	9216	3	1.5368	0.00019055	0.0014089	0.744071	21	6	1.5368
	PDCD10	5	1	1	1	17986	0	3.396	1.0438e-07	2.7501e-07	0.000215	22	5	3.396		DPEP2	3	0.44459	0.51797	0.999107	10272	1	0.10953	0.00023499	0.00070095	0.729538	22	1	0.10953
	TADA2B	5	1	1	1	17985	0	4.5214	1.1535e-07	2.7501e-07	0.000215	23	5	4.5214		GHR	27	0.27477	0.65969	0.999258	7990	10	0.38113	0.00023815	0.0030244	0.875113	23	15	0.38113
	DAPK3	5	0.99981	0.99982	1	17931	0	4.391	1.4832e-07	8.2504e-07	0.000619	24	5	4.391		RASGRP3	9	0.9623	0.96931	0.99931	18273	1	2.7055	0.00024242	0.0017969	0.758306	24	7	2.7055
	BCL2L11	17	0.97939	0.99364	1	17278	1	1.7132	3.4735e-07	3.5752e-06	0.002011	25	13	1.7132		AGTR1	6	0.31805	0.52915	0.999107	8807	1	2.4717	0.00026543	0.0014163	0.744071	25	5	2.4717
	SPRED1	5	1	1	1	17984	0	3.047	3.5061e-07	1.3751e-06	0.000854	26	5	3.047		RBMY1B	2	0.99973	0.99973	0.999996	18957	0	3.9929	0.00026619	0.00051768	0.654455	26	2	3.9929
	HIVEP1	5	1	0.99999	1	17967	0	4.8813	3.5901e-07	1.3751e-06	0.000854	27	5	4.8813		PRRG2	3	0.9997	0.99969	0.999996	18956	0	3.8385	0.0002995	0.00088943	0.729538	27	3	3.8385
	MED15	5	1	1	1	17980	0	3.9317	3.6664e-07	1.3751e-06	0.000854	28	5	3.9317		SF3A3	3	0.33146	0.45431	0.99645	8963	1	6.086	0.00030344	0.00089674	0.729538	28	2	6.086
	CBLB	5	1	1	1	17983	0	4.1924	4.4784e-07	1.3751e-06	0.000854	29	5	4.1924		SRC	6	0.83103	0.86738	0.999258	15878	1	2.8168	0.00031263	0.0016585	0.744071	29	5	2.8168
	TSC2	4	1	1	1	17982	0	3.4519	5.0561e-07	1.3751e-06	0.000854	30	4	3.4519		NTNG2	3	0.018873	0.048826	0.942024	1056	1	4.6869	0.00032043	0.00095522	0.729538	30	2	4.6869
	TAF6L	5	1	1	1	17981	0	3.4462	5.1278e-07	1.9251e-06	0.001155	31	5	3.4462		TADA1	3	0.99968	0.99967	0.999996	18955	0	4.6741	0.00032305	0.00096305	0.729538	31	3	4.6741
	NFIB	9	0.99894	0.99893	1	17879	0	2.0144	6.1483e-07	6.3253e-06	0.00292	32	9	2.0144		CYP7A1	3	0.31107	0.44365	0.994925	8713	1	4.8132	0.00035588	0.0010638	0.729538	32	2	4.8132
	C11orf73	5	1	1	1	17979	0	3.6739	6.8541e-07	2.4751e-06	0.001437	33	5	3.6739		GOLGA8N	3	0.8076	0.8075	0.999258	15429	0	5.0143	0.00037935	0.0011296	0.729538	33	2	5.0143
	VGLL4	5	1	1	1	17978	0	2.4135	1.0109e-06	4.1252e-06	0.00225	34	5	2.4135		C16orf78	3	0.84252	0.84252	0.999258	16073	0	5.3345	0.00038031	0.0011317	0.729538	34	2	5.3345
	CRB3	5	0.99999	0.99999	1	17965	0	2.8169	1.2534e-06	4.6752e-06	0.002338	35	5	2.8169		SERPINF1	3	0.99961	0.99961	0.999996	18954	0	3.3731	0.0003886	0.0011541	0.729538	35	3	3.3731
	NHLRC2	5	1	1	1	17977	0	3.7369	1.2904e-06	4.6752e-06	0.002338	36	5	3.7369		CYP21A2	5	0.9996	0.99959	0.999996	18953	0	2.5063	0.00039778	0.0017995	0.758306	36	5	2.5063
	MIDN	5	1	1	1	17976	0	2.3184	1.3885e-06	4.6752e-06	0.002338	37	5	2.3184		OS9	3	0.99958	0.99958	0.999996	18952	0	2.7883	0.00041703	0.0012424	0.738397	37	3	2.7883
	SBNO2	5	1	1	1	17975	0	2.5579	1.5638e-06	6.3253e-06	0.00292	38	5	2.5579		SF3B6	3	0.99958	0.99958	0.999996	18951	0	3.4019	0.00041846	0.001246	0.738397	38	3	3.4019
	MYL6	4	1	1	1	17973	0	3.2035	1.8426e-06	5.2252e-06	0.002542	39	4	3.2035		FBXO41	3	0.43984	0.51517	0.999107	10216	1	3.4585	0.00044859	0.0013343	0.744071	39	2	3.4585
	STK40	5	1	1	1	17972	0	2.2095	2.1239e-06	7.4253e-06	0.003342	40	5	2.2095		GNAQ	3	0.99954	0.99953	0.999996	18950	0	3.4345	0.00046017	0.0013677	0.744071	40	3	3.4345
	PPM1F	5	0.9998	0.9998	1	17928	0	3.4172	2.7062e-06	1.1826e-05	0.005192	41	5	3.4172		TMEM237	6	0.98205	0.98199	0.999825	18625	0	2.168	0.00046144	0.0024438	0.827528	41	5	2.168
	KLHL12	5	0.99114	0.99123	1	17599	0	3.0482	3.2239e-06	1.4026e-05	0.006011	42	5	3.0482		CCND3	5	0.63271	0.74763	0.999258	12637	1	2.9843	0.00046502	0.0021112	0.768519	42	4	2.9843
	GATA6	5	1	0.99999	1	17970	0	3.0169	3.6069e-06	1.5126e-05	0.006332	43	5	3.0169		PHB	4	0.82422	0.82414	0.999258	15762	1	3.2927	0.00051275	0.0018815	0.768519	43	3	3.2927
	LZTR1	5	1	0.99999	1	17968	0	2.5633	4.6333e-06	1.8976e-05	0.007591	44	5	2.5633		NTSR2	3	0.8835	0.88355	0.999258	16806	0	5.395	0.00051893	0.0015186	0.744071	44	3	5.395
	WWC1	5	0.99999	0.99999	1	17963	0	2.5871	4.8097e-06	1.8976e-05	0.007591	45	5	2.5871		RHOG	3	0.72146	0.72216	0.999258	14004	1	3.418	0.00053402	0.0015583	0.744071	45	2	3.418
	CDC42	5	0.99999	0.99999	1	17966	0	3.3541	5.194e-06	2.1176e-05	0.008287	46	5	3.3541		RPL34	4	0.064115	0.14941	0.994651	2759	1	4.1477	0.00054347	0.0019781	0.768519	46	3	4.1477
	TRIM28	5	0.99999	0.99999	1	17964	0	3.2334	5.9773e-06	2.5576e-05	0.009796	47	5	3.2334		DAPP1	3	0.99945	0.99946	0.999996	18949	0	3.7465	0.00054572	0.0015959	0.744071	47	3	3.7465
	RNF7	7	0.54697	0.72035	1	11698	2	1.7617	6.2946e-06	3.2726e-05	0.012273	48	5	1.7617		S100A12	3	0.98211	0.98227	0.999825	18627	0	5.2785	0.00054715	0.001599	0.744071	48	3	5.2785
	SPRED2	5	0.91061	0.91099	1	15815	0	2.7333	8.2468e-06	3.8227e-05	0.014043	49	4	2.7333		LRRFIP1	6	0.51769	0.68677	0.999258	11128	1	2.1539	0.00055535	0.0029257	0.875113	49	5	2.1539
	LIMK2	5	0.99996	0.99996	1	17954	0	2.7506	1.1484e-05	5.0327e-05	0.018119	50	5	2.7506		WDR26	3	0.99944	0.99945	0.999996	18948	0	4.2752	0.00055895	0.0016335	0.744071	50	3	4.2752
	SUPT7L	5	0.99999	0.99999	1	17962	0	2.2841	1.2266e-05	5.1977e-05	0.018346	51	5	2.2841		KDM5A	3	0.3888	0.4857	0.998948	9643	1	1.5816	0.00057673	0.0016872	0.744071	51	2	1.5816
	GOLGB1	5	0.82629	0.83331	1	14405	1	3.3189	1.2714e-05	5.3077e-05	0.018374	52	3	3.3189		WNT16	6	0.99573	0.99575	0.999825	18882	0	1.8572	0.00057871	0.0030458	0.875113	52	6	1.8572
	DNTTIP1	5	0.99993	0.99994	1	17945	0	3.3581	1.5325e-05	6.4078e-05	0.021763	53	5	3.3581		ITGB4	6	0.65126	0.78024	0.999258	12915	1	2.6732	0.00063412	0.003333	0.929249	53	4	2.6732
	PARD3	5	0.99998	0.99998	1	17961	0	2.4353	1.7007e-05	7.5078e-05	0.025028	54	5	2.4353		ERMN	6	0.7249	0.82824	0.999258	14060	1	1.1767	0.00067568	0.0035282	0.929249	54	5	1.1767
	TAOK2	5	0.99106	0.99114	1	17596	0	2.9056	1.8014e-05	7.9479e-05	0.026013	55	5	2.9056		SLC9B1	3	0.12364	0.21616	0.994651	4346	2	-0.94643	0.00070486	0.0020418	0.768519	55	1	-0.94643
	FBXL5	5	0.74817	0.78232	1	13408	1	3.1034	1.9155e-05	8.4429e-05	0.027139	56	4	3.1034		FITM1	3	0.62913	0.64328	0.999258	12579	1	5.2096	0.00072016	0.0020846	0.768519	56	2	5.2096
	HS6ST2	5	0.26782	0.44451	1	7781	1	2.3817	2.019e-05	8.8279e-05	0.027605	57	4	2.3817		FRAT1	3	0.99928	0.99929	0.999996	18947	0	3.2754	0.00072231	0.0020898	0.768519	57	3	3.2754
	MAU2	5	0.9998	0.99981	1	17929	0	3.6119	2.0571e-05	8.9379e-05	0.027605	58	5	3.6119		PDC	6	0.30369	0.51292	0.999107	8607	2	0.55177	0.00072617	0.0037851	0.93491	58	3	0.55177
	ERF	5	0.99998	0.99998	1	17960	0	2.0683	2.0893e-05	9.0479e-05	0.027605	59	5	2.0683		DTX4	3	0.11097	0.1998	0.994651	4003	1	5.0309	0.00073068	0.0021154	0.768519	59	2	5.0309
	FOSL2	5	0.99998	0.99998	1	17959	0	2.9712	2.1468e-05	9.5429e-05	0.02863	60	5	2.9712		RASGRP1	3	0.99852	0.99855	0.999893	18937	0	3.795	0.00074757	0.0021598	0.768519	60	3	3.795
	PTBP1	5	0.99986	0.99987	1	17935	0	3.665	2.4936e-05	0.00011908	0.03514	61	5	3.665		CDK9	3	0.99924	0.99925	0.999996	18946	0	3.5513	0.0007569	0.0021885	0.768519	61	3	3.5513
	SETDB1	5	0.99149	0.99158	1	17608	0	3.4682	2.6165e-05	0.00012458	0.036171	62	5	3.4682		KIAA1324L	6	0.31419	0.52483	0.999107	8761	2	2.3743	0.00080523	0.0041715	0.93491	62	4	2.3743
	ADRBK1	5	0.40582	0.56273	1	9792	1	2.5779	2.9585e-05	0.00013943	0.03984	63	4	2.5779		SSTR4	3	0.99819	0.99823	0.999825	18931	0	4.6255	0.00082875	0.0023801	0.820612	63	3	4.6255
	BST2	5	0.99997	0.99997	1	17958	0	2.6887	3.1658e-05	0.00015153	0.042621	64	5	2.6887		RASGRP4	3	0.30411	0.43998	0.994925	8613	1	-0.14776	0.00087569	0.0025138	0.836286	64	1	-0.14776
	FRMD6	5	0.94721	0.94739	1	16560	0	2.2803	3.3466e-05	0.00016033	0.044402	65	4	2.2803		EEF1D	5	0.050647	0.14203	0.994651	2386	2	0.53884	0.00090532	0.0040394	0.93491	65	3	0.53884
	BCR	5	0.99996	0.99997	1	17957	0	1.8043	3.5342e-05	0.00016583	0.04523	66	5	1.8043		TMEM184A	3	0.99907	0.99909	0.999996	18945	0	3.1453	0.00092646	0.002661	0.861973	66	3	3.1453
	MYO18B	5	0.99996	0.99997	1	17956	0	1.9899	3.5715e-05	0.00016968	0.045589	67	5	1.9899		GPR126	3	0.99907	0.99908	0.999996	18944	0	4.5899	0.00093379	0.0026819	0.861973	67	3	4.5899
	EWSR1	5	0.99996	0.99996	1	17955	0	2.7819	3.7495e-05	0.00017958	0.04685	68	5	2.7819		SLC11A2	12	0.99745	0.99746	0.999825	18913	0	1.2586	0.00093426	0.0074609	0.951032	68	11	1.2586
[truncated: 18,895 more rows]

## Sheet: Supp Data 4
	Supplementary Data 4. Genes ranked for enrichment: MAGeCK analysis of gefitinib vs control HCC827 cells following transduction with a genome-wide CRISPRn or CRISPRa library.
[truncated: 18,963 more rows]

[truncated: 14 more sheets: Supp Data 5, Supp Data 6, Supp Data 7, Supp Data 8, Supp Data 9, Supp Data 10, Supp Data 11, Supp Data 12, Supp Data 13, Supp Data 14, Supp Data 15, Supp Data 16, Supp Data 17, Supp Data 18]
